# Supplementary material
Source: publisher figshare collection journal article supplement (https://gsajournals.figshare.com/ndownloader/files/15558686)
Supplement: Supplementary file 1 [file 15558686]

>g2
ATGCATGCGCGAAACTGCAAACTTGCAGATGAACAGACTTTTGGTTCACTCAGAATGAAC
TGGGGAATATTCCAAGGTTTGCTCAGCGGAGTTAGCAAATTCTCCACTGCATTTGGCCGT
ATCTGGTTATCTGTTGTCTTCATATTTCGACTTCTAGTTTATGTGGTGGCAGCAGAGCGA
GTATGGAGTGATGAGCAAGGGGACTTTGACTGCAACACCAAGCAACCAGGATGTACAAAT
GTTTGCTATGATCACTATTTCCCTGTCTCACATATTCGACTGTGGGCTCTTCAACTTATT
TTAGTCACCTGTCCATCTCTCCTTGTAATAATGCATGTTGCGTATCGGGAGGACAGAGAA
AAAAAATACAGGGAGAAGTTGGGAGAGAACTGTGGAAGACTGTATGTGGATACAGGAAAG
AAGAGAGGAGGTTTGTGGTGGACTTATCTCATCAGTCTCCTAACAAAAGCTTTGGTGGAT
TCTATATTCCTTTATGTCTTCCATCACATCTATGAGAATTACACTCTTCCAAACGTTGTC
AAGTGCACCATTGACCCTTGTCCAAATATTGTTGACTGCTTTATATCCAGACCAACTGAA
AAAAATCTCTTCACTCTCTTTATGGTGGTAACTACTGGTGTTTGCATCCTACTCAACTTG
TGCGAGATGGGCTACTTGGTGTGTAAGAGATGTCACGAGTGCCTTACCCACAAAAACATG
TCAGCCAAGGAGAAAGACAACAAAGTCATTGTATATCTTCAAAGTCAGGAGATCTTCCAT
AACATCAATAAGATGAATGAGGAAATGGACAGACTGCATCCATGCATACATGTGACACCA
CCGGAGACTAAATTGTCTTGA
>g3
ATGAACTGGGGTGTCTATGAAGCCCTGCTGACAGGAGTTAATAAGTACTCCACTGAATTT
GGGAGACTTTGGCTTTCCATTGTCTTCATTTTTCGAGTCCTGGTATATGCAGTGTCAGCA
ACTCGTGTCTGGGGTGATGACCAAAGAGATTTTGACTGCAATACTCGCCAGCCAGGATGT
ACCAATGTCTGTTATGACTACTACTTCCCTGTTTCTCACATTCGACTTTGGGCACTGCAG
CTCATCTTGGTTACATGTCCTTCTCTGATGGTTGTTATGCACGTTGCCTACAGAGAAAAT
CGAGAGAGGAAGCGTAAAGAGAAATTTGGGGAAAACTGTGATAGACTTTACAAGGATATT
GGCAAAAAGAGAGGAGGACTATGGTGGACATACCTCCTCAGTCTCTTGGTCAAGGCTACG
GTAGACAGCACATTTATATATGTCTTTTATCGGCTGTATGATAACTTTTTCCTGCCTAGA
TTGGTGAAATGTCCTCTTGCCCCTTGTCCTAACATTGTGGACTGTTTTATATCTAGGCCT
TCTGAAAAAAACATCTTCACCCTTTTTATTATTGTGACTTCTGCAATCTGCATAATTTTG
AACTTAGTGGAAGCAACCTACCTAATTGGGAAAAAGTGCAAAGAAAACATCCATGGAAGT
ACACAGAAAAATTTTCACGAAAGAATTGAAACAACAGCTCTAACTAGTTGCTCTGTTCAC
AGGGAAAATAAAGATTCCAAAAGAGCAGGAGATACTCATGATGAAGTAGACTGTAAGACG
TTGACCACCAAAGTTAGCACTACATCTTGCAAGAAGACAAAAGAAAACAATGATGAGTGA
>g11
ATGTTTGACTCTAACTCTGAACTCATGAGGCACCAACATCTTAACAAAGGAGTGAAGCTT
TATTTCTGTTCCGAGTGCAGGAAATGTTTTAACAGGAAATCAAACTTTGCTCAGCATCTC
AGAACTCACACCGGGGAGAAGCCTTATTCCTGTACCAAGTGCGGGAAATGTTTTAACAGG
AAGGCACACCTTCTTCGACATCTCAAAATTCACACGGATGAGAAAGCTTATTCTTGTACC
GACTGCGGGAAACATTTTAAGGACAACACAAATCTTGTTAAACATCTCAGATATCACAAC
CAGAGGAAGTCTTTTTCCTGTTCCGAGTGCGAGAAAAGTTTTAAATGCAACTTACACCTT
GTTGAACATCTCCGAATTCACAGCGGGGAGAAGCCTTATTCCTGTACCGAGTGCGGGAGA
TGTTTTAACAGGAACTCAATCCTTATTCGACATCTCAAAATTCACACGGGTGAGAAAACG
TATTCCTGTCCCGAGTGCGGGAAGCTTTTTAAGGCGAACGCAGATCTTGTTCAACATCTC
AGATATCACTCTGGAGAGAAGCCTTATTCCTGTTCAGTGTGCGGGAAATGTTTTACTGTA
AACTCAAGCCTTGTGCAACATCTCAGAATTCACTCTGGAGAGAAGCCTTATTCCTGCTTG
GACTGCGGAAAATGTTTTCGGTTTAGTTCGCAGCTTCGTCGGCACCGAACAATTCACACC
AGTGAGAAGGCGTAA
>g20
ATGTCGCAGCAAACCTGGGGATATGAGGCATGCAATGGACCCGACCACTGGCACAAGCTC
TATCCCATCGCTCAAGGAGATAACCAGTCACCCATTGACATTAAAACCCAAGAAGCAAAG
ACTGATGGTGCACTAAAGTCTCTTAGCATTAACTACAGTTCATCGTCTATAAAATCCATA
GTCAACGTTGGACATTCTTTCCAAGTGATCTCTGAAGACAAGGACAACATATCAGTGGTG
AAAGGTGGACCCCTTCAGGCAACCTATAGACTGAACCAGTTCCATTTCCACTGGGGGCCA
ACCAATGATTCTGGGTCAGAACACACTGTGGACGGCAAGAAATATGCTGCAGAGCTGCAC
CTGGTTCACTGGAATGCTGATAAATATTCAAGCTTTGCCGAAGCTGTTCAGAATCGCGAT
GGATGTGCTGTTCTTACTGTCTTCCTACAGGTTGGCAATGCACACCCAGGACTGCAGAAA
GTTGTTGATGCGCTAAGTCTCATTAAAACAAAAGGTAAACAAGCCGCTTTTACTAATTTT
GATGCTGCAACCCTTCTTCCTGCCTCTTTGGACTACTGGACCTACTTTGGCTCTTTGACT
CACCCCCCACTGCTTGAATGTGTGACATGGATCATATTCAAAGAGCCGATAAGCGCCAGC
TCTGACCAGATAAACCAATTCCGAAGTCTCCTGTCTTCGGCTGATGGGGATACAGCTTGC
CCGGTTTTGGCCAATAATCGCCCTACGCAGCCATTGAAGGGAAGAATAGTCAAAGCTTCC
TTTTAA
>g22
ATGGAAGGTGAGAAGAATGAAGCCCTCCATAAGATGATGGCTAGCGAGCAGAAAGCAGCC
CTTTTCAACCTCTTCCAGGACAAGAACAGGCCGTCGGCCGCCAACTGGCCTCAGGAGAAT
TCCGAGCTCTACGTCGTCTCGCAGTTTTTTGTGGAAGAGTGGCGAAAGTTTATACGGAGG
CCAACAAGATGCAGCCCTGTGTTGTCCTTGGGTAACAGCATCCTCCTGTGTCCGCACGGG
GGCATCATGTTCACGTTTTCCAACATGACCAACGAAGACGCCAGGCTTGTAGCTCTCTTA
TGGCCTGAGGAATGGGAAATAATGCGGAAGCTCTTTATCGTCGATTACTCGATAAGGATT
AGCAGATCGTTTGTGACTGAGGGTGATGGGATTGTAGCTGCGCAGTATGTGTCTGAGCCA
GAGATGTGTCCAGACTGCCGGGAAGGGCTGCTATGTCAGCAGCAGAGGGACATGCGCGAA
TACGCCCAGGCAACAATCTACATCCACAAAGTGGTGGATAACACAAAGGTGATGAAGGAG
GCTGCTCCCGAGCTGAATGTCAGCAGTTCCGAGCCCGAGGATGAAAAAGACGATCAGCGA
CCCGAAGGGGAGATTGATCCAGATTTCCACCAGACAAATGGAGGAGTGAAGCGTCAGAAG
GTGTCCAGCCAGGGCCACGTTTCCCACCACAAGCAGGGCATCCGCCGCAGCACGCGGAAT
AGGAAGGTGCGGGGAGAAAAGGCTTTACTGGTCTCTGCCAACCAGACCTTAAAGGATTTG
AAAATCCAGATCATGCACGCATTCTCAGTGGCTCCGTTCGACCAGAACTTGTCCATCGAG
GGGAAGGTGTTGAGTGATGACTCCGCCACTCTCGGCGACCTGGGGATCATTCCAGAATCG
GTGATTTTATTAAAGGCAGATGAACCGATTGCAGACTACGCTGCCATAGATGATGTGATG
CAAGTTTGTATGCCAGAGGAAGGATTTAAAGTTGTTTTCGTTTGCCAGGAACGGGTCTTC
TTGGGCACTGATGCGGTGACGCGGGGTTCGGCTCGTAGCGTGGAGCACCGAGGTGTTTCC
GTTCAGACCGAAGACATCGGCTTTCCCAGGAGGCCTTTCTTCCAGATTCATCTCCCACTC
CAAATGCCTTATGACTACAGCAGATTGCACTGA
>g27
ATTTCTGGGAAAAGTCAGCTACTGTTTGCACTGGTATTTACCACACGGTACCTGGATTTA
TTCACCTCATTTATATCCATCTACAACACTGTAATGAAGATCATCTTTTTGCTTTGTGCA
TACGTCACAGTTTACTTGATCTACATGAAGCTACGCAAAACATACGACAGCGAGAATGAC
ACATTCCGGTTAGAATTTCTCCTGGTGCCTGTTATTGGATTGTCCTTTTTGGAGAATTAT
GATTTCACTCCTTTAGAGGTGAGAGTTTATCTTAGCACTGTCTTCTAG
>g24
TATTGGATCAATGAATACACATCTACTCTGGGAATAGGGGTATTCCATTCAGGGATCGAA
ATCTATGGCAGAGAGTTTGCTTACGGAGGCCATCCATACCCATTTAGTGGAATTTTCGAA
ATCACGCCTGGCAGTGCCCTGGAGCTGGGGGAGACATTCAAATTCAAGGAATCTATTGCC
CTTGGCACTACAGATTTCACAGAGGAAGACATAGATAACATCATGGAAGAGCTCGGGAAG
GAGTATAAAGGAAACGCTTATCACCTAATGCACAAAAACTGTAATCATTTTTCGGCGGCA
CTGGCTGAGATGCTGTGTGGGAAGGAAATCCCGCGCTGGGTGAATCGGTTGGCCTACTTC
AGCTCATGCATCCCATTTCTTCAGAGCTGCCTTCCGAAGGAATGGCTGACACCAGCAGCC
TTGCAGAGTCACATCACGCTTGGCCTCCAAAGAGAAGAACAGGGAGACACAACAGATGAG
GACTCGCCATCCACTTCGGCGGCAGCAGCAGCCGCCCCATCCGGAACGCGAACTTCGGCG
AGTTGTGTTAAAGAGATCACTGTTGAAAAGCAAACATCTTGGGCAGATGTCCACCTGACT
GTTGAGAAGCAAACATCTTGGGCAGACGTCCAGCTGTCTGTTGAGAAGCAAACATCTTGG
GCAGATGTCTACCTGGCTATTGAGAAGTAG
>g18
ATGTATGTGATATTGGGGCGGTGTAAGCAGCGTGCGGACTGGCGGTGGACGGTGGAGAGG
GCGGCCATCATCTGCCGCTGGACCTGGTTACAGGCGCAGGTGTCTGACCTCGAGTTCCGG
ATACGGCAGCAGACTGAGATCTACAAACAGATCCGGTGTACCAAGGGCGCCGTTGTTCTC
GGGGATTGTGCCCAGTCTGAGGACGGATCGAATCGGCCCGCAGGAGGTGGGAGAAGCGGC
CGCCTGTCTGCCGGCCGAGTCCCCTCCGGGGAAGGTGCCGAGACGGCCAGCGGCTCCCGC
TGGGACCCCAGCCCTGACAAACAGGGTTCCCGCCTCGCCCAATCTGTTGAAAATGTTCCG
TGTCAAAATCCACCCGCTACCCCCGCGTCTGAATCCCACGGACCCCACAAACCGCCTCGT
CAAGTCAACGGACTCGTCAACTGCGTGCGCTCCGGCCCGGCGTGTAACGGCTCCGCGGGG
GATTTGGATCCGGACGACGCATTGGGCAAGAAACGTCGCGCCGCCGGCCTTCCCGCCTCA
GCACTTACAGAGTCCGGCTGCGTGGCTGCGAGAACGCGACCTCTCCGCGGGTACAAGAAG
CGACGGCTCGTCCGATCCAGTGCGGTGTCGTCCCTGAGCCGGAAGCCGCAGAAGCCGCTG
TCCGTGAAGTGCGGCTGCGAGGCTCCCGTCGCGTGCATTTTGTGCGGCTGTAAAACCCAC
GCAAAAGATGCGGACCCCGGCTGTATGACGACGAGAGAGCGGATAGCACTGACGGACCCC
GCTTTCCACCCCATCCTCTCCTTCCCTCACGACACATCCCTTAACTTGCACTTTGAAGCT
TTGCTGAAAGATGATCGTCGGTTCCGGCTCGGCCACGGACTCAAAGCTCTGAAGCTCTCC
CAGCTTAACAAGAAGCCTCTGGACAGAGGGAAGAAAGACCCACAGAGCCCCGCGGCGGAC
CCTGCAGCCGCAGGTTATTCACACGGGGGACTCGACCAGGAGAAGCTGTGTCTGTACCGC
CTGGAGACGTGGCAGCGCAACGCCGATAGAGTCCGGTCCCAGCTCCGAAGATCCGCTCCG
TTTTCCGCCTCCCAAGGGTCCCTGTTGAAAGAGGAGCGGCCGCACAAAGCGTTCTCCAGC
CATGTATCCACTACCCCTTCCAGACCGAGCTCCATGTGCCACTCGCTGTCCTCTCTCCCC
GACGCCTCGTGTGCCGGCTCGGCGAACATTAAAAGGAAACGAGTGGAGAATTCGTACGAC
ATCAATAACATCGTCATTCCCATGTCCATGGCGGCAGCCGCTCGCGTGGAGAAGCTGCAG
TACAAGGAGATCCTGACTCCGAGCTGGCGGGTCCTGGACTCTGTGGAGAGAGACTCGTTC
CTGGAGGCCGATCCGCAGCTGGAAGATCTGTCTGACGAGACGTATCTGAATCGCCACAAC
GCGCACGAGGAGCAGGAGCGATCTCGCTGGGATTCCTGGGCTTCGATGTACCCCCAGAGG
CGCGGCAGCCGATCTTCCAACAGGTCAGACGGCCGCTGGACCCCGCAGCCCCCTTCCCAC
AGCCAGGGGTCACTTCAGCCAGCATCCCCGGATGTCGGTTTCCAGAGCCTTAATGACGTC
CCGCTTACCCTGGCATCCACTGCACCCGACAGCCCAGAGCCTTACAGCACAGTCCCGTGC
CTCTCCGTCCGGAACAGGACCAGAGTGTTCTCCTGGAGCGAAGAGACGCGGTCCTCCACC
CCGGAGCTTCCCGATGAAGAAGAGCAGGCCGTTCTGCCGTGGGAGCGCCGAGCCTTTCCC
CTCTCGGACAGAGATCTGCGAGCGCTGCAGGAATTGCCTGAAACCCCCACCAGAGGCAGA
AACAAGCAGCCCCCGGACATCACGTGGCCCCCGTCAGACCAGCCTGGTCCACGAACTGAG
AGCACAGACTTTGGCGCGTCAACAGAAAGCCTCGGCCCTCCTTCCAAAGACCCCCCGCTC
CCCAACAGCATTTCGGTGGTTCGTTTCCGCGCCCACAGCGGAGAGAAAATCGCGAGCTTG
GAGTACTTCCCAGCCAGGCCGGTCACCAAGAGATGA
>g23
ATGGCGCCGCGACTCCAGCTGGAGAAAGCTGCCTGGCGGTGGGCCGACACAGTGAGACCC
GAAGACGTGGGGCAGGAGCACATCGAAACGGCTTACCGGGTCCGCCTGGAGCCCTGCGTC
CGGGGCTTGTGCAGGTACCAAGTCTCAGAACCCAGCATTGGGCCGCTAAATGCAGGGAAG
TACTGGCCCTGCGGAGCAGAAAGGCGGGCGCAGCCGAGAGCGCCGGAGTTGCCGTCCGAT
AGACCTGCTCCAAGTAGCAAAATCACGTGCGGGCTCAGCCACTGCTTCATTTACTATTTG
AAGCCTTTCCTGGAGGGTTTTGTGCACTACGTGCTGTACAGGCGACCCCTCAGTGACTTT
ATCACCTCGGTGCTGCGTCCAGCGGTGCGACGGCTCCGCGGGGAGGTGGGGGCCGGTGCG
ACGGCTCCGCGGGAAGGTTGGGATGGCCAGAACATTTTGCGAGCGCTTTTTGTCGCGTAT
CTCTGGCCAACCAAGGAGCCGGAAGGAGCAGGGAGAAACTGTAAAGGAAATCCGAACTGT
TTAGTGGGGCTCGGTGAGCACGTTTGGCTCGGAGAGATAGATGAGAACAGCTTTCACAAC
ATCGATGACCCAAACAGCGAGAGGAGGAAGAAGGACACGTTTGTTGGTTTGACCAATTTG
GGGGCCACTTGTTACGTGAACACGTTTGTCCAAGTGTGGTTTCTTAACACGGAGTTCCGC
AGAGCTCTGTATCTGTACGAGAATTTGCGGAGCGTGGCCAAGGCCGAGGAGTGCATCCAG
GAGGATAAAGAGTACGAGCCCCAGTCCGTCTGCGAGCAGCTCCAGTACTTGTTTGCTTTA
CTGCAAAACAGCAACAGGCGGTACATCGATCCTTCCGGGTTCATCAAAGCTCTCGGTCTG
GACACTGGACAACAACAGGATGCCCAGGAATTCTCCAAGTTGTTTATGTCCCTGCTGGAG
GACACTTTGTCTAAACAGCAGAATCCAGATGTAAGAAACATTATTCAGAATCAGTTCTGT
GGACAGTGTGCTTATGTCACAGTCTGCAGTCTCTGTGGCCGGGAATCCAAGTGCGTCTCC
AAGTTTTATGAGTTGGAACTGAATATCCAGGGACACAAGCAGCTCACGGACTGCATCGCC
GAATTCCTCAAGGAAGAAAGGCTGGAGGGTGACAATCGATATTTCTGCGAGAACTGCCAG
AGTAAGCAGAACGCTACGAGAAAGATTCGCTTGCTTGATCTGCCACCGACGCTCAATCTG
CAGCTGATGCGCTTTGTGTTTGACAGGCAAACGGGTCATAAGAAGAAGCTGAATACATAC
ATCGGGTTTTCAGAGACTCTTGACATGAACCCATCTTTAGAGGGGACTGACGGAAGGTTT
GTGTACGACCTGAGTGCAGTCCTTATACACAGAGGAGTGAGTGCGTACTCTGGCCATTAC
ATCGCTCATGTGAAGGATCCTCAAACTGGTGAATGGTATAAATTCAACGACGAAGAAATA
GAGAAGATGGAGGGCAAGAAACTTCAGTTAGGGATTGAGGAGGATCTAGAGCAGTCTAAA
GCCCCAGCGCGCAAACCTAAATGTGCCAAAGGCATCCACTGTTCCCGCAACGCGTACATG
TTGGTTTATCGACGGAAGTCGGATGAGAAAGAGGATGTACCTTTTGAGGTGCCAGCTTTC
CTGCAGAAGCTGGTGGAACTGGATAACTGCAAGTTTGAGGAATGGTGCGTGGAGATGTCT
GAGATGCGCAGAGAAAGCGTAGACAAAGGGAAAGCCAAGCATGAGGAGGTGAAGGAGCTG
TACCAGAGGTTACCTGCTGGAGCTGGGGACGCCTATGAGTTTGTGTCTCTGGAGTGGCTG
CAGAAATGGCTGGATGAGTCCACGCCGACTAAAGCCATTGACAACTCCAAATGGCTGTGC
CCACATGGCAAGCTGCACCCTGACAAGACTTCCATGATGAAGAGGATCTCTGCGTATGCA
GCAGAAATATTTTACCAGCGATACGGGGGAGGCCCTCGCCTCAAAGCTGACGCGTTGTGC
AAGAACTGTGTGGTGGAGCGGTGCCGGCTCCTTCGCCTGAAGAACCAGTTAAATGAAGAT
TATAAAACCATATGTAACTTGGTGAAGGTTACGGCCAGCAGTGATGAGGGCTTTTGGGTT
GGGAAGGCATCGCTGCGACGCTGGCGCCAGTTGGCGTCCGAGCAGCTGGGTCAGCAGGAT
GATGAACTGGATACGAGCAATGGGAATGTTAATGGAGACGCGCCGAAGATGGATTCAGAT
GATTTGCCTGAAGAAAAGAAAGAAAGTGAGCCGGAGCTTGGCTTTAATGAAGACATTGTT
TGCGAGCACGGTGGGCTCTGCATTGGTGAAAGTGAGAGGAAAGTGATAACGGATGAAGCG
TGGTACAAACTGAAGGTGTACTTCCCTAGTGCTCCAGAATTTCGGCACACCAGGAGTCCT
GTTCCCAGTGCAAGGTATTTCCAAGAGTACAATAGTCCTTCGCGCTCTGCTGCAAGCAGG
GGTTTTACGCACCAGAGCTAG
>g31
ATGGAGAACCAGGACCCGTCCTGTCAGATCAGAGACTATTATAATTTACTTGGGGTTTCA
AAAGATGCGAGCAGTAGAGAAATCCGTCAAGCTTTTAAGAAGCTGGCATTAAAATTACAC
CCTGATAAAAATCAGAACGATCCTAATGCACATGACAAATTTTTAAAAATAAACCGGGCA
TATGAGGTTTTGAAAGATGAAGACCTTCGAAAAAAGTATGATAAGTATGGTGAAAAAGGT
CTTGAGGACCAACAGCAAGGTGGCCAGTATGAAAGCTGGAGTTTTTATCGCTATGATTTT
GGTATTTATGATGATGACCTTGAAATTGTCACTTTGGACAGAGGAGAGTTTGATGGTGCT
GTCAACTCTGGGGAAGTGTGGTTTATTAATTTCTATTCACCTCGATGTTCACACTGTCAT
GATCTTGCGCCTACGTGGAGAGAATTTGCTAAAGAAATGGATGGACTACTTCGAATTGGA
GCAGTGAACTGTGGTGACGACAGAATGCTTTGCAGAAGTCAAGGAATCAATAGCTACCCA
AGTCTTTATATTTACAGAGCTGGAATGAATCCAGTAAAATATTTTGGGGAACGAACAACA
GAGGATTTGGCAAATTTTGCTATGCAGTTTGTTTCAAGCACTGTGACAGAGTTATGGGCA
GGAAATTTTAGGAGTTCCATTGAAAATGCATATGCCTCGGGACATGGTTGGCTTATTACC
TTCTGTGCTGACAGTGGAGACTGTTTAACTTCCCAGACACGTTCAAAGCTGGCAGCTATG
CTGGAAGGGCTTGTCAATGTGGGATGGATGGATTGTGCTACACAAGCAGACCTCTGTGAG
AATCTGGACATCACCACAAGCGCAACGGCCTACTTCCCTCCTGGAGCTACATTAGTGGAT
GATAAAAGCAATGTTTTGGACAGATTAGCACATCATCGCTGGCTTATTTTCTTCATTTTT
GGGGAGAATGAGCAGTCCCACATTCCAGAATTCAAAAAACTAAAGGTTTTGCTTAGCAAT
GAACATGTCCAACATAACATCAGAGCTTATCCAACAACCGTAGTATTCAACCAGTCCAAC
ATTCACGAATATGAAGGTCATCATGATGCAGAACGGATTTTAGAGTTCATACAGGATCTT
CAAAACCCTTCAGTTGTTGCACTCACCCCAGAAACTTACAAAGAGTTGGTGAAACGGCGG
AAAAGAGATGAAATCTGGGTTGTTGATTATTATGCTCCGTGGTGTGGACCGTGTCAAGCC
CTGATGCCAGAATGGAAACGAATGGCAAGGCTTTTAAATGGCTTGATCAATGTTGGAAGT
GTTGACTGTCAGAAGTACGGTAACCTGTGCAACCAAGAGCATGTGCAAGGCTATCCTGAA
ATCAGGCTTTACCCTGCAAATACAGACTCTGCAAATCATTACTTCCCATATAATGGCTGG
CACAGAGATTCCCATTCTCTTAGGATCTGGGCACTTGGTTATTTACCAAAAGCATCTATT
GACCTTACACCTGAAAGTTTTAATGAGAAGGTGCTAAATGGAAAAGACCATTGGGTCCTA
GATTTTTATGCTCCATGGTGTGGCCCATGTAGAAGCTTTGCTCCAGAATTTGAGCTGCTA
GCTCGG
>g40
ATGGGTCCCCGTTTTATTGGTCCTTTCCGCATCCGTGCCATACTCAACGACGTGACGGTG
TCCCTTGATCTGCCACCTACCATGAAAATACCTAGGTCCTTCCACGTCTCATTGTTGAAG
CCGTTTGTGACCAACCAGTTCTCCGGTCCCGTTCAGTCTCCTGCTCCCCTCGACGTCCAG
GGTCATGAGGAGTACCTTGTCGACAGGGTTCGCAACGGCTTGCAGTACCTTGTGGCCTGG
AAGGGGTACGGTCCTGAGGAGCGGACTTGGGTGCCGTCTCGCTTTGTGCACGCTCCCCGT
TGTGTTGCCCGTTTCCACACGCTGTTTCCCTCTCGTCCGGCTCCGTCGCGCTCGGGGCGC
GCTCCTGTGTCCGTAACGAAAACCGACCATCCGAACGAGACGTGTATATCGGACTTGCCG
TGA
>g32
ATGGATTGCACCAGCCAGAGTGCAAACATTACCACCAGACCTCTCCTGCCTCCAAGTCTG
CTTCCATCAGTATCCTCTCCATCCCTTTCCACTCCTTCGACAATGCCAGTCCCACCAGGT
GTGCCAATGGCGGCATCATTCCTGAAGCCCCCCACTCTGCTATTAAGAGCTGCAGCAGCA
GCTGCTGCTGCTGCCTGCACCCCAAGGATGGCAATGTCTCTGGACAGAGGGACAGGGTCA
GGTGCTAGTGGTTTGTACCCAAGAACACCAAAGTGTGCAAGATGCCGCAACCATGGTGTG
GTATCAGCACTGAAAGGACACAAGCGTTTCTGTCGTTGGAGGGACTGCTCCTGTGCAAAG
TGTACGCTAATAGCAGAGAGACAACGCGTAATGGCTGCACAGGTGGCACTCAGAAGGCAG
CAAGCACAGGAGGAGTGTGAGGCCAGGGGTGTGCAACACTTCATGTACCCAGTGTCAGGC
ACAGGGGTGGAGGCAGTCGGACACAGGGTCCAAGGACATCAGCTGCTCAACCAGTCAGGG
AATAAAGGTTCAGATGAAAAAAATGAAAAGAATGAACACTCTTTGCAAAAAATATCAAGA
TCCATGGCAGTTTCCCATTCTCTTTCACAATGCTCTCCACACGGCATAACCAACATGCAC
CATAACTTGAAGACTTTGTGTCAAGAAACCTCAAGCAGGGGAAATTCTCTTCAGTCCCCT
GTATCAGAAACCAGATCAGAAGGTGCTGATAGTCCACATTCTCTGTCTTCTTCTTCTGAC
CAGGAATCAGGAAACGAAAGTGAGTGGCCTAAAGAGCATAGTGACCCTAATTCAAAAGTC
CCAATTGTATCGTCTAAACACAGAGATCCCCTGGAGATACTGAGTAAAGTCTTCCCAAGC
CACAAACAAAGCACACTAGAAAGAATCTTGCAGTGCTGCAAAGGGGATGTGGTTCAAGCC
ATAGAACTGGTTTTAAACGGAGAAGAACACAAACAAGATGTAAAGGATATAGGAAGTCCA
TTAGGATCTGACCTTAGCTCATTTACAAGAGATCCAACATTCAATCTCACTGGTTTTGGG
TTTGGTGCATTTGGCACTAAATCTGCATTTTCTCCTCTTCACACAAGTCCATCTTCTATT
GAAGGTGACACAAGTATATTTAACCCTAGACTTGGGCTTAGCCCCATGCGCTTGGCTTAC
TCAACATCTAACAGAGGACTACCTGGTTTTATATCGCCTTATATTACATCGGGGTTTGTT
CCATCATTTCCATTCCGTCCTGGAATGAATTACTCGTTGCCTGGGATGCTACAAGATGCC
CCTTATTATCAACGTAAGGATGCTGTAGCCATCACAGGACTTTATTCCAGATTAAACTCG
GACAATCAGTAG
>g52
ATGTCGAACAACATGACCCGCATCGCCGAGGCGCGGAAAGCCGTGGAGCAGCTGAAGATG
GAAGTGAACGTGAACAGGATGAAGGTGTCTCTGGTGGTCTCCGAGCTGCTGTCGTTCTGC
CAGTCTCACTCTCTGTCGGATCCACTCGTCTCCCCGGTTCCATCGTCTGAAAATCCGTTC
AGAGAGAAGCGA
>g61
TCCGTGGGATTGAAGCCAGCATCTGGACTAAAAGGAAAATATCCTTTGCTGAAGTCTAAC
TATGAAGCAAAGCACACCCGTGGTCTGTATGTGGTGGGTACAGCTAGTCATGGAATTGAT
TTTCGGAAATCTGCTGGTGGATTCATACATGGCTTTCGTTATACAGCTCGATCTGTCCAC
CAGTTAACTGAATACGGGTACCACGGTATACCCTGGAGAGCGTCTTGTTACCCTATCTCT
CAACTCCTTAATGTTCTCCTTAGACGTATGAATGAAGCATCAGGTCTGTACCAGATGTTC
GAAGTCCTGGCCGATGTAATTCTTCTTGGAAAAGATGCCAAAGACTTCAAATATTTGGAG
GAGGTGCCAGTTGGAATCCTGCCAGATTTAAAGAAGAGCACTGGTCACAAGGTACAGGAA
ACAGGACTGTTTATTCTTGTGATGGAATATGGGAAGAACTTTTCTGGGCCAGATAAAGAT
GTCTTCTATTACAACCGTGCCATTGGAGAAGCAAAAGAAGCATGGCGTTCCAACTTTCTG
CATCCTGTGCTCTATTATTACAGTATGCTGCCAACAGGTACATTCACAATCCCTTAA
>g55
ATGGAAGATGGTGTAAAGGGGAATAGCAATACCTCAACAGCATCTCAGGTTACTTTCAAA
GCCGGCTGGTTAAAGAAAAGTAGTGGCCTCCTAGGCTTGTGGAAAGATCGCTATATTCTG
CTACTGAAGACCAAGCTGCTGGTGTGCGAAAGTGAGGATGAACAGAAATGCTTGGAGACA
CTGGAGCTCAGTAGCTACGAACGGTGCCAGGATCAGAGAGCTTTCCTCAAGCGCAAAAGG
CATTTCACCCTTATCCCATCACCAGGCACCAAGGTGCAAGATGTGAAGTTTCTGGCAAGG
AATGCAGAAGAGAGGGACACGTGGATCCAGGCACTAAATGATGGAATAAACAGAGGCAAA
AACACAATTCTTGATGAGGTGAAAGTGGACACCACCATCTCATTAGAACATGTGACCAGG
GACAGAGCAAGAATGGGACCAGCAAAGAGAAGACCTCCCACCAGAATCCACCTTAAAGAA
GTTGCTGAAGCTGCTGAAGATGATTCTTTAAGGCTAGGTCTGGATACACTGAAGACTGAA
GTTTTAACAGTAATACCACGTGAACCTGAGGAAAGGGTACCTCAACCACAGAAGGAACCA
GTAAAGATACCTATGCCACCTTCAAAACCGTCTTCCTCTACTTCAACTGAAATGCATCAA
CAAGATAACTCAGGCGGTGTTTCTGAAATACCTCATCCGCCATCTCCACCTCCAAAAACT
GCCAAGGAAAGTATTTATGCCAGAGAAAAGTTTTTGTCAGAGGCTGAGGAAACAAAACAG
GAGATCAAGACACCGAATAGTGGCAGCCGAGAAAATTTAGTAGAAATAATATATACCCCT
CCCAAACCTCCACCGAAGATTTTATCTGACAAAATGAAGATTAAATGGATGGGATCCTCT
TCAGACATGTTGGAAACAGAAAGTATGAAATCACATGATAACGGTAGCAAAGAAAACTTG
GTAGAATTTGAGTCTGATGAACCTGAAACATCACATAGTCCTGTTCTACAAGCGTTTGAG
GAAGCGGAAGCTGCAGTGATTGAACATAGTGCGAGCAATGTGGAAGGTGAGAGCCTGGAA
GTCCCTAACGATGTGGTTAATAAGGACTTAACTGATGGAGATAGTCTGAATGAATCCTCC
AGAGAAGATAAAGAAGAAGAAACAAATACAAAGTCAGAAACAAAAGACCAGCTTGAAGTT
AGTGATGTCCAAGACACAGAAACATATGAGAAGGTAGAATCTTTACCAAATGAAGGTTCA
GATGAGGATACACATTCTTTAAAAGTAGAAGGATCCAGGTTTCCTGACACAAAACCAAGG
TCATCTTCCATGGGCAACCTACTGAGCGAATTCAGCATGGATAGTGAAAGTAAAACTATG
CAAAAGAGCTACTTATTACATGTCACTAAGGACCATTTTCATGAAGTAGAGATGAAGCTG
TCTCGTGGAAGGAAGAATACTGAGAGCCTTTTAAACCAAGTATTGCAAGGCCAACTCGTA
AAGAGCTCTGAAGCCAATGGACCAGACATTAATGCAGAGACTCTTCTGCATGAAGCAGTG
AAACAACTCAGAGAAGCATCCATGGTGCTGCAAGAGATAAAAGAATCTAGTAATGCATCA
GCTATCCCCGAGGCAGTGACTGACAATCAGAAAGAGAAGAGAAAGGAACTACTGACTCTT
TACAGGAGGAGTGTCCCTTAA
>g54
ATGGGGCTTTTTTACTGCAATAAGAGTAGCGGCGGTCCCAATAATGTCTGGAACGGCATT
AAAAGCCAAATTCAGAGCCATGCACCGGATTGCCTGGAACTGGATGAAATCCACATGCTG
CAGCAGAAGAGAATTGACGACTCTCCCCTACTTCTCGCTGCCAAAGAGAACGACGTTGGC
GCGATCAGGAAACTGTTGGATTGTCCATCTACTGACCTACACATGCGAGGTGCGGTGGGA
GAGACCGCCCTTCACGTGGCCGCGCTGTATGATAATTTGGAGGTAGCGCGGATCTTGATC
GAAGAAGCCCCTGATCTCATCAATCAGCCGATCACCTCTGATCTTTATGAAGGGCAGACG
GCGCTTCACATCGCAGCCGTCAATCAGAACATGAATCTGGTGAAGCTGCTGATTGAAGAA
GGCGCCGACGTCTGCTCTCCTCGGGCCACCGGAAGCTTCTTTGCCTACAGTGAAGAAAAT
CTCTTTTACTTCGGCAACACAGTACTCCATATTCTTGCCCTTCAGCCCAACCAGACCTAC
TCCTGCCAGATGTTTGACCTCATCGTGTCCTACGACCAAGGAGAAGGCGAGGGAAGTCTT
GAGATGGTCCCGAATCACATGGGGCTCACCGCCTTCAAACTGGCCGCTGCCCAAGGGAAC
GCCGTGATGTTCCAGCATCTGATACAGAAGCGCAAAAGGATCCAATGGACGTTTGGTCCC
ATTTGCTCGACTTTGTACGACCTGTCGGGGATTGACTCATGGGGCGAGGAGCAATCTATA
CTAGAGCTTGTGGTGTCTTCCAAAAAAAGAGCGGCTCGGCAAATCCTTGACCTGACGCCC
GTGAAGGAACTCGTCAGCCTGAAGTGGCGAAGCTGCGGCCGCCCGTACTTCTGGTTCTTG
GCGGCCTTGTACGTGATGTACATGATCTGCGTGACCATGTGCTGTATCTACAGACCCCTC
AAGCCGGTCTCTAACAAGTCAAACAACTCGCGTCACATCACCATCCTCATGCAGAGGCCT
CTAAATGAGGCGTATACGGAGTACGAAGACGAGCTGAGGCTGGTTGGAGAGTTAATCAGC
GTCATTGGAGCCATCGTTATCTTGCTTCTCCTTATCCCAGACCTCCTTCGTGTTGGCGCC
ACTAGATATTTTGGGCAGACTGTTCTTGGAGGACCTTTTCATATAATCATAATTGTTTTT
GCCTGCATGGTGATGGCTGCGTTGGTGATGAGGGTAACAAACAGCGACGGAGAAGTTGCC
CCCATGTCTATTGCTCTGGTGCTTGGCTGGTGCTATGTCATGTATTTCACAAGAGGCTTC
CAGATGCTCGGACCTTTCACGATCATGATTCAGAAGATGATTTTTGGGGATCTTATGCGG
TTTTGTTGGCTCATGGCTGTTGTCATTCTTGGTTTTGGAGCGGCATTCTATGTGATCTTC
CAGATGGAGGATCCCGATCAGCTGGGTCATTTCATGACTTACCCCATGTCCCTGTTCAGC
ACTTTCGAGCTCTTCCTTACAATCATCGACGGACCCGCGAATTACGACGTGGACCTGCCG
TTCATGTACAGTTTTATGTACTCTGCGTTTGCTATAATAGCGGCTTTGTTGATGCTGAAC
CTGCTGATCGCCATGATGGGAGACACTCACTGGAGGGTGGCGCATGAGCGAGACGAGCTG
TGGAGGGCACAGGTGGTAGCAACTACTATAATGCTCGAGAGGAAGATGCCAAAAGCCCTG
TGGCCACGTTTGGGGATTTGTGGGAAGAATTATGGACTAGGAGACTGCTGGTTCCTCCGA
GTTGAAGAACGCAGGGACTTGGACAAGAGAAAGATCAAAAGCTACGTTGATGCTTTCCAG
GCCACTGACGAAGATGATGGCGGAGACCAGAAATCTCTAAATCCAGATTCCACAGAAGAC
AAAGAAGAATCCTATCACCCGCGTGGCGCGAATCCACCGTCGTCAATGACCCCTCCTCTA
GACCGCAAAGTATCCAGCAGGCGATCAAGTAAAGGATGGAGCCTTCTCCGAAAGGCCTCT
GTTGACCAACTGCAAGGCAAAATTAATTACGCCCTAGACATTGATGAGGATGTATATGAT
GTGGGTGTCTCGGGTTTGCCGTCCCTGGTACCTCCCAGTCGAGTGCCGAAGCTGCGCAAT
GGAGGTGCCTTCAGAGACTTGTGGAAGCCGAACCTATGCGAGGGAATCTCCCTTTTTATC
ATATTGAAGTTCTGCCAGCTCCTTCCTATACATGAGTAG
>g63
ATGGAAAAAGAAACATATAAAGCAGCCAAATTAATCCTTGAAAGGTTTGATCCAGATTCC
AAGAAGATAAAAGATCTCGAACACCCTGTTGCTGGCGCACCCATTACTCCAAGGCCAGGT
CAAGATCTGCGCCAGAGGACGGCAGCTCAAAGAAATATAAGTGTGTCTACTCCAGTAAAC
CAGAGCCAGGGATCTCCACAAGTTGCAATGCTGTTGGCGGCAACTCCAGGTCTTCAAAGG
GATACTTCAGCTCCTGGTGCCCCCCCTGAGCGAGCTATTCAGCCAGCAGTGCTGCCAAAC
CTTGTTGTGAGACGGCCGGGATCGCCTGCCCCTTCAGTATCTGGAATGGCTATTCATCCT
CCAGGACCTCCTTTGGCAAGGCCAATTCTTCCACGAGAGAGGGGAGCTGTAGACAGAGTT
ATTGAATACTTAGTTGGTGACGGGCCTCAAAACAGATATGCCTTAATCTGCCAGCAGTGT
TTTTCTCACAATGGAATGGCTCTTAAGGAAGAATTTGAATATATTGCTTTTAGGTGTGCT
TACTGCTATTTCCTGAATCCTGCCAGAAAAACAAGACCACAGGCACCGAGACTTCAAGAA
TTTAACTTTGAGAGGCCACGAACTGACTCTCAAGGCTCAATTAGTGCTGGACAAGTGACT
ACAGAAGAACAGTTGGAAAACCAAACCTCTGCAGAAACACCAGAAGAGTCTGAGGCCGAA
TCACAGGCTACCACAGTTACAGAGGATATGGCGGATGACTTGTGCACTGAGCAGGCAGAT
GACAAAATACCAGAGGAAACACCAACAGACAAATCAGCGGTACAAGAGATAAAGATGCCA
ACTGCCAGTGTGGTGGATGAAAGTGAAGAGTCCCTTATGGAAACAGAATGA
>g59
ATGTTTAAAGCCAACCAAGGAATGGGAACCTGCTTACCGTGTCCTGCCAATAGCCGGTCG
ACTGCCGAGGCTTCTCCGATCTGTGTTTGTCGCAACGGCTACTACCGCGCTGACTTTGAC
CCACCTGAGGCTATGTGTACAAGTGTTCCCTCGGGTCCACGCAATGTGATTTCCATAGTC
AATGAGACATCGATAACTTTGGAGTGGCATCCACCACGTGAAACCGGTGGCAGAGACGAT
GTCACCTACAATATCATTTGCAAGAAGTGCAGGTCCGACCGCCGCAGCTGCTCCCGGTGC
GATGACAATGTGGAGTTTGTCCCACGGCAGATGGGGTTGACCGACACGCGTGTCTTTATT
AGCAACCTATGGGCTCACACCCCTTATACCTTTGAAATCCAGGCGGTGAATGGGGTTACC
AACAAAAGCCCCTTCCCTCCCCAACATGTCTCTGTCAACATCACCACCAACCAAGCAGCT
CCCTCTACTGTCCCCATAATGCACCAGGTTCGAGCCACCATGAAGAGCATCACTTTATCT
TGGCCTCAGCCGGATCAACCCAATGGAATTATCCTGGATTATGAACTACGATATTATGAG
AAGGATCACAGCGAATTTAACTCTTCCATTTCAAAAAGCCAAACGAATACAGCCAGCATA
GAAGGGCTCCGGCCCGGGATAGTTTACGTGGTACAGGTCCGGGCTCGCACTGTGGCAGGC
TACGGGAAATACAGCGGAAAGATGTGCTTCCAGACGTTAACTGACGGTGGTACTTTGGCC
TGTTCGATCCTAATTTTCCCTCACTGTGAGATAATTGAATTCCAACACATCTGTCACTAC
TTGACAGACGAGAGGGTTCTCCTCCACGAGCGGAAATATTCTGCCCACGCTGGCAGGGGG
CAGCTTGCCAGATTACTGCAGGAGTACAAGTCGGAGCTGAGAGAGCAGCTGCCCCTGATC
GCGGGATCCGCAGCTGCAGGAGTGGTCTTCATAGTCTCTCTGGTAGCCATCTCCATTGTC
TGCAGTAGGAAGAGGACCTACAGCAAAGAGGCTGCGTACAGCGACAAACTGCAGCATTAC
AGCACTGGCAGAGGTTCTCCAGGGATGAAGATATACATAGATCCTTTTACATACGAAGAT
CCCAACGAAGCCGTGAGGGAGTTTGCCAAGGAGATCGATGTCTCGTTTGTGAAGATCGAG
GAGGTCATCGGGGCTGGAGAATTCGGAGAAGTGTACAAGGGGCGCCTGAAACTCCCAGGA
AAGAGAGAAATCTATGTTGCCATCAAAACACTGAAGGCCGGGTACTCTGAAAAGCAGAGA
CGGGACTTCCTGAGCGAAGCAAGCATCATGGGTCAGTTTGACCACCCAAACATCATTCGG
CTAGAAGGTGTGGTGACCAAAAGCCGGCCAGTTATGATTATTACAGAGTTCATGGAAAAT
GGAGCCCTGGATTCCTTTCTACGGCAAAACGACGGGCAGTTCACGGTGATTCAGCTGGTT
GGGATGCTCAGAGGTATTGCAGCCGGTATGAAGTACCTCTCAGAAATGAACTATGTTCAT
CGTGACCTGGCAGCCCGAAATATCCTGGTAAACAGCAACTTGGTCTGCAAAGTGTCAGAC
TTTGGTCTGTCTCGCTATCTACAAGACGACACTTCAGACCCCACATATACCAGCTCCCTG
GGTGGGAAGATACCCGTCAGATGGACAGCCCCAGAAGCCATCGCTTACCGCAAATTTACA
TCAGCCAGTGATGTGTGGAGTTACGGCATCGTCATGTGGGAAGTCATGTCATTTGGAGAA
CGGCCATATTGGGACATGTCCAACCAAGATGTCATCAATGCTATAGAGCAGGATTATCGC
TTACCACCCCCCATGGACTGTCCAGCTGCCTTACACCAGCTCATGTTGGACTGTTGGCAG
AAGGATCGAAACAGTCGGCCACGATTTGGGGATATTGTCAATACTTTGGACAAGATGATC
CGAAACCCTGCCAGCCTCAAGACAATGGCCACCATCCCTACTGTGCCTTCCCAGCCGCTG
CTTGACCGGTCGATCCCAGATTTCACAGCCTTTACCTCAGTAGATGACTGGCTGAGCGCT
ATTAAAATGGGACAATACAGAGACAACTTCCTGAGCTCTGGCTTCACCTCGCTGCAGCTG
GTTGCCCAGATGACCTCAGAGGACCTGCTGAGGATAGGAATAACATTAGCTGGACATCAG
AAAAAAATTCTTAACTGTGTTCAATCCATGAGGGTCCAAATGAGCCAATCTCCCACCTCT
ATAGCATGA
>g71
ATGCGCGGAGCGAGTATTATTCCTGCAGATACCGAATCGCTATTTACCAAACGGGTGGAA
TCGGTTTTCCTGCAGAGCAACAAACTTCATTCCATGACTGATGATTTGGTGAATGCTGGG
GTCAGCGCCCTGTTTTTCTTCATCTCCTCGGTAACTTTGGCCTCCATCAACCACAAGTCC
GGCTCTGCGATCGCTGCAGCGAGATCCCCAATAGAGCGGCTTCTGGGGGCAGTTGTTGTT
CTCGTGGTCCGTCTGGGTTTCTGGCTGTCTGTCCGTTGA
>g66
GTGCTGGTGGGGGCTCCGTGGGACGGATCCGCTGGGAACAGACAAGGAGACGTGTACAGA
TGCAGCGTGGGCGCCCAGGCCAACTCCACATGCGCCAAGGTCAACTTGGGCGAACTCGCC
CTCAGGAATGTCTCCAAAGAAATCAAAAACATGCATTTCGGCATGTCGCTGACCCAGGAC
GCGGAGGGTGGATTCGTGGCCTGTGCCCCTCTCTGGTCTCAGGAATGCGGGTCCTCTATG
TACAGTACCGGGATCTGTACCCGGGTCGACAGAACCTTCCAGCCGACGGAAACCATAGCT
CCAACGGCGCAGAGATGTTCCACCTACCTGGACATTGTGCTTCTGCTGGATGGGTCCAAC
AGCATCTACCCCTGGTACGAGGTACAGAACTTCCTCAGCAACATTCTCAGCAAGTTCTTC
ATCGGACCGGATCAGATCCAGGTCGGGGTCCTGCAGTACGGAGAAGTAGCTGTCCATGAA
TGGTCCTTGAAGGACTTTACAACCTCCAAAGAAGTCGTGGAAGCAGCCAAAAACATCAGC
CGGCAAGAGGGCCGGGAGACGCGGACAGCGTTCGCCATACACAAAGCCTGCTCTGAAGCT
TTCAGCCCCGAGCGCGGCGGACGCAAAGACGCCACTCGACTCCTCATCGTCGTAACAGAC
GGTGAATCCCACGATGGAGACGAACTCCCCATGGCGTTACTGGAATGCGAGAAGCGTGAC
ATCACCCGATACGCCATCGCAGTTTTGGGCAACTATATGAGAAGACAGCAGGATCCGAAT
TCCTTTATCAACGAGATCAAATACATCGCCAGTGACCCTGACGAGAAGTATTTCTTCAAC
GTCACCGACGAAGCTGCTCTCAACGACATTGTAGATGCTTTAGGGGACAGAATATTCAGT
TTAGAAGGGACGTTCGGGTTTAATGAAAGCTCCTTTGAGCTGGAGATGTCACAGGTTGGA
TTTTCCATCCATATGTTAGAGGTGAGTGACGTGGATGAACTCTCTGACCATGCTGACCAA
CAGACGTTAAAGCGAAAGGTTATGGTGGCCAACCCATACATGTGCCCCAGGCCCCAAATG
GTTAATCGCTGTGGTTAA
>g74
ATGTTGCTGTGGAGATTGGGGGGCCGGTGCCCCGCTTGGGGTATACTGCGCTCCCCGGCA
CAGAAAGGCCCCAGCTGGGCGGCCCGCCGGGGGCTGAAGGGCCGGAACCCGTTCACCAGC
GGCCAGGAGGATGAGTGGCGGAGCCGCAATAAGACCGTCCTGACGTACGTGGCTGCGGCC
GCCGTGGGGATGGTGGGCATGTCGTATGCCGCGGCAACCGGCCTCGGAGGGGCAGCGGTG
GCCGGACATAACTCTGAGCAGATCGAGACGATGGAGCCTGTGAAGGATCGTGTGATTAAA
GTCAATTTCAACGCAGATGTACACGCCAGCCTGCACTGGAATTTTAGGCCTCAGCAAACA
GAAGTCTATGTGGTTCCAGGTGAAACTGCGCTAGCTTTTTACAGAGCGAAGAACTCCACA
GACAAGCCAGTGATTGGGATATCCACCTACAATGTGGTACCGTATGAAGCTGGCCAGTAC
TTCAACAAAATTCAGTGCTTTTGCTTTGAAGAGCAGAGACTGAACCCCCACGAAGAGGTG
GACATGCCAGTGTTTTTTTACATCGACCCGGAATTTGCCGAGGACCCCCGAATGATAAAA
GTGGACACAATCACGTTATCTTATACCTTTTTTGAAGCCAAAGAAGGTCACAAGTTACCT
CTCCCTGGCTACAACTGA
>g70
ATGCCTCGGCCAGGAAAGAATTCATATAGTGACCAGAAACCTCCATATTCATATATCTCT
TTGACTGCTATGGCCATCCAGAGTTCCAGTGAGAAAATGTTGCCCCTCAGTGACATTTAC
AAGTTCATTATGGACAGATTCCCTTACTACCGAGAAAATACCCAGAGGTGGCAAAACTCA
CTAAGGCACAATCTCTCCTTTAACGATTGCTTCATCAAGATCCCGAGAAGACCAGACCAG
CCTGGTAAAGGGAGCTTCTGGGCTCTTCACCCAGACTGTGGGGACATGTTTGAGAATGGT
AGCTTCTTGAGGAGGAGGAAGAGATTTAAGGTACACAGAGCTGAGCACCTGGCATCCAAA
AATCACCAGATGATACACTATTTCCACCACCAACACAATCCGAGCAAGTTGGGTCTTGCT
TCTTCTGAAAGCGCTACAGTAGCTGGCATTGGAAGGTTACCACACTTTCAACCGTATGCT
ATTAGTGGGGCACAGACCACTGGGTTTAAGCACCCTTTTGCTATAGAGAACATCATTGGC
AGGGACTACAAAGGTGTTATGGCTGGTGGACTTCCTTTAGCCTCTATGATGCATCATCTT
GGATACCCTGTACCCAGCCAACTGAGCAACATGGTTAGCTCTATGTGGCCTCACGTTGGT
ATGATGGACTCTGTGACGAGTATGACGGTGCCACAAGAATATGGACACTTTGGTGTGCCG
ATGAAAACTATTTGCCATGCTCCTAGTCAGACAATCCCTGCTGTCCCTGTTCCCATAAAG
CCCACAGCCTCTCTACCACCGGTTTCAGCCATTCCAAGTTTGACAGTGAACCCCTCCAAC
ATGTGCTCTTCACTACCATCTCAGACTGGAGTGGCAGTGTCCCGTCTGGCTCACTCACCT
TCTGCCCACTCTGAGAGTAAGGCCGGCATGCTGCACTCAGTACTGATCCACTCCTAG
>g79
ATGGCAACTCAGAAATGGATGACAGGAAAAATACTTTGTCAAACAGGAGTTGATTTGGTC
AATGCCACAGATCCAGAATTAGTCAAATTTATTGGAGATATTTACTATGGACTTTTCCAA
GGAGGCAAAGTGCGACAGTGCGGGCTCGGTAAGAGACGGTTCAAATTCACAATCTTCCCG
CACATGGTGAAAACATTGAACAGCACTCTTCACGTGGCCATTATACTGTTCCTCTTCTCA
GCCATATCTTTTGCTCTGATCAGTTTTGGGTTCTGTGTTCACAATATATTGAAGGTTCCT
TACCGCTCCATTAAGGGCCCTGCTGGAATATGCCTTTGGAATTTTATCGCAGGGATGTTT
ATTGTGTTTGCTGCAACAAGCTTCATTGCCGCAGTCCGACTCCATCAACTCACAGAAAGA
ATTGCAAACTTCCGAGAAAACGTTTTCAGAATTGTCATCTTAGAAGAAACATATGAAGAC
TCATTTTGGCTGTGTGTAGCAAGTGGAGCAACCCATGCAGCAAACATGTTATTAATGGCA
GCAAGTGCAATACGCCTCCCTAAGTTTAAGACAAAGACAGAAGAGGCAAATGTGACTGCA
GAGGACATCATGTATTGA
>g83
ATGCAAGAACAGCCCATTAAAACATTTAGCCATCACAGCCTTACAATCCTTTTGGCCACA
GATCAAATTAACATTATAGAGAAGGGGGCAGAAGCTGTAGAAGCGCAGTGTAAAAGATTT
GAGGTGAAGTCAAACGAGGATGGAAGGATGCTGTTTTCTGCCGATGAGGAGGAAATCACC
ATTGGTGCTGATAGACTCAGAGTAACAGGAACTGAGGGAGCAGTTTTTGAGCACTCTGTG
GAAACACCATACATAAGAGCAGGACCTTCTCAAGACCTC
>g73
ATGGCTGGGATGGAGAAGACGGCTGAAATAAGCGAGTGTCCCGTCCAGCTGATTACCGTA
TCTAAGCACACAAGCCTGGGACTGAGCCTCGGAGGACTTAGCAGCACAGAAGGGCCATTG
ATCTACGTTAAGGACATTATCCCCGGGGGAGACTGTCACAAGGACGGGCGTTTGCGACCA
GGAGATCGTCTCGTCTCTGTCAACTCAGAATCGCTGCTTGGGGTGTCCTGTGAAGAAGCA
AAAAGCTTATTAAACAGAGCAAAATTACGGAGCGGCGCTACCTGGGAAATCGCATTTATC
AGATCAGAGAAGACGCGTCCCGAGCGGATATCGCACCCGGATCAATCTGCGCGGTCGCGT
GAAGCCATGGACTTCACACCAACGTCGTCCTCCACTCCTAGCGCCGTGAAATCAGGCCTG
CCGGTCCAGAGGGGACAGGTTAAGGGCCATCAGAGCCCAGATGTCTCGGAAGAACCTGTG
CCAGACCGTCTTCGAGAAAAGTTGGCTTTTTTGAATCCCGATGCCAGGATCAAGGTGGAA
AAACTTGAGTCGGCTCTGAACTACCTCGGAATAACCCCCACAGAGGAGCAGAAACTGGCA
ATACGGCAGAGCGTACAGACGGACGCCAACGGAACCGTGTCTTTCGGAGACTTTGTCCAG
GTGGCCAGAAACCTGTTCAGCTTGCAGTTAATGGCAGGAGATCTTGGCCCCAATCCCGTC
GTGCCGAGAGAAAACGAATCGTCAGGTTTATTAAGCTCCGTCGCTAATCAGGTTCAGTCG
TGTAATCTCTCCGACACGGACGATGTAGAAAGGTTAAAAAGAGAAAAGGATGAGGCGTTT
GCGGAGATAAAGAGACTAAAGGACCAGCTCTCTGAATCAGAGAAACAGAAAAATCACGTC
TCTGAAGAGCTAGAGAATGTGAAACGGGAAGCCAAAGCTTCGGTGGAGGAGGCCAGAGCC
CTACGAAGCAGGATTCACCTGGCCGAAGTGGCCCAGAGGCAGGCGCGGGCCATGGAGATG
GACTTTGAGGAGGTCATCCGCCTCTTGGAGGCCGAAATCGCGGAGCTGAGAGCTCAACTG
GCAGATCACTCCGGCCAAAACAAAGACAGCGCGCAGGATCTGAAGCGGCGAATTACCGTC
CTGGGCTGCCAGCTGCGCAAATCCGAGCTGGCGAGAAAAACCTTCGAAGTGTCCACGGAA
AAGCTTCTCCAGTTTGTTGAGAGTGTCCCTGAATTACTGGCCGACGATACGAGCTCCACG
TTAAACCTCTGCGAACGGATTCCTGCGTTTCCATCTCAGCTGTCGAGGCTGGGCGCAAAC
AGACGCGGACTCGCGGCAGCCCTCGCAACAGAAGCGAAAGAACTTGCAAGATCCGTGCGT
TCCATCATCGAAGTAGACTGCCTCCCGTACGGCTGGGAAGAAGCTTACACTGCAGATGGA
ATCAAGTACTTCATCAAGTAA
>g77
ATGCCAACGCCCCTGTCTCCCCACAGGTTTGTAGCTGGAAAAGGCCTAGTCATTTACCCA
GAAATTGGTGATCGTCTGGACATAATCTGCCCCAAAGGGGAGCCATCTCAGCCTTATGAG
TATTACAAGTTGTATATGGTGCGCAAAGACCAGGCGGAATCCTGCAGCACCGTCATGGAT
CCCAACGTCCTGGTGACCTGCAATCAGCCGGACAAAGAGTTTCGCTTCACCATCAAGTTC
CAAGAATTCAGCCCCAACTACATGGGCCTTGAGTTCAGGAGACACCAGGACTATTACATT
ACATCAACATCAAATGGGACCCTCCAGGGCCTTGAAAATCGGGAAGGGGGTGTCTGTCAA
TCAAGATCCATGAAGATTATCATGAAGGTTGGGCAAGATCCAAACGCTGCTTTACCGGAA
CACCTTACGACTAGCAGGCCCAGTAAAGAGGCAGACAACACGGGAAAAATGGCAACTCTT
GGACCCTGGATCCACGTGGTAGAGGGAGAAGCCCCTGCCAGGCCAGGTACCAACGCAGAA
AATACTGGAGGTGTTGACAGTTTCTTCAACTCTAAGATTGCCGTGTTTGCTGCGATTGGA
GCTGGTTGTGTCATCTTCATCCTTATTATAATTTTCCTAATTGTCTTACTTATCAAGATC
CGGAAACGCCACCGCAAGCATACGCAGCAACGGGCGGCTGCGCTCTCCCTTAGCACGCTG
GCTAGCCCCAAGTGCAGCGGCAACGCAGGCTCAGAGCCCAGTGACATAATAATCCCACTG
CGGACTACAGAGAACAACTACTGCCCGCATTATGAGAAGGTGAGCGGTGACTATGGGCAC
CCTGTGTACATTGTGCAAGAAATGCCCCCGCAAAGCCCTGCAAATATTTACTACAAGGTC
TGA
>g65
ATGTCCGGGTTGTTGCAGGAGAAGAGCCGAGCGGAGGAGCAGCTCGTTCACATGGGAGAG
GAGCTGGAGGCTCTGAGGTCGGAGAAAGAAGTCCTCCACGAAGCGCTGCGAGAACTCACT
CAGGCCGTGCTCAGTGACTCAGACAGTGGTCTGCAGATGTCCGCCAGCGACAGGACTTCT
GACTTTATAGAGAGTGAGGGTCCGGGGCTCAGCCTACGTGGTCTGTCCAGCAGCCTGCGC
GCCTCCTCCCCGCTGAGACGCTCCTCGCCGCATCGCAGCAGCTCTCCAAGGCGCAGCCTG
TCCCCGGCGCTCAGAGACTCAACCGTGTCCGCGGTGCACTCGGCCTTACAAAGGAGGCAG
CTGCAGGTCCAGGAGCTGAGGGGCCGCCTGGAGGCCGGTCAGGAGACAGTCGGATCCCTG
CAGAAGCAGCTGAGCGCCAACGAGAACGAGCGCAGGAGCCTGGATGAGAAGATCCTGCAA
ATCCAACGCGAGCTGGACGCGTGCCGCTTGGCCAGAGAGGACGCCGAACACAGAATAGCC
AGACTGCGGAGCAACGCGGAGCAACTAACCGGGGACAGGGATGCTCTGCAGGGGACGGTG
CAGAACCTGCAAGAGCAGCTGGAGACGCAGCGCCAGGAGTACGAGAAGCTGCAGCTGGCA
AACGGCGACCTGCAGCGGCAGAGAGATATCCTGCAGGAGGAGAAAGAGGATGCCTTCCAG
GATCGCGACAGGGCCCAGCGGGAGGTGGAGAGAGGACACAAGGCTCAGGAGCAGCTGGAA
GTGAAGCTGTCGGCCCTGAGGAAGGAAGTGGTGCTTGTGAAGGAATCTCTGCATCGCTCC
AGCCTGGAGAAAGAGGTGTGCGAGGCAGAGAGAGAGGACATCTCCCAGGCGCTGTCTAAG
GCCGAGACCGGCCGTGCTGAGCTGGAGCTGGCGCTAAACAGACAGAGGACCGAAGAGGCT
TCGCTGCGGGATGCTCTGTCCAAAATGAGCGCTCTCAATGAGAGTTTGGCCCAAGACAAG
ATTGAACTCAACCGCATTATAGCTCAGCTGGAGGAGGAGCGCTCCTCTCTGCAGGGGCAG
AAGCATGAAGTGGAGCAGGAGAAGGCATCCATTCGGGACGAGCTCGTCCGCCTGGAGCAG
GAGAAGCTGGAGCTGGACACGGAACGCTTTGGCTTGGATAACTCCCTGCAGGTCATGGAG
CAGAGCCGCGAGAAACTCCTGCAGGAGCTGCAGACGCTGCGCAGGGAACGGGGGCAGTTA
CAGGAGCAGCTGGGGCAGATGTCGCGGCAGAAGAACTCGCTGAGCGAGGATCTGGTGCAG
AGTCGGAAGGAAGTGGAGCAGCAGAGCGAGAGCCTCCTCCGAGCCTTCAAGGAGAAAGAG
GGCCTGATGAAGGACAAGGGCAGCCTAGCGGTGCAGCTGACGGCTTCCGAGCGAGAGAAC
AGGGCACAGGCCGAGGAAATAGCTGCTCTCAGGTCGGAGAAGGAGGCGTTGGAGGGCGCG
CTGTTTGATGTCCAGCAGCAGGTCGCCCGCATCTCGTCCCGCAAGGAGCAGGTGGAAGCC
GGGAACCAAAGCCTGCGCTCGGCCAAGGAGGCTCTGCAAGCGGAGGCCAACGCTCTGCGC
CAGCGCATGGAGGCTGCGATCAGCAAGTTGGAAAGAGACAAAGAGACGCTGAGCCAGCAG
CTGAGCCACATGGAGAAGGAGGCCGAGGTCACGCTGAGGAGCGAGCAGAAAGCCCACGAG
GAGGACGTGGAGCGGCTGCACAGGGAGAAGGCAAGTAACTCCATAACCAAAAGAGAGACC
CTTCGCAAGGAGCTGGAGTCTGAGAAGGAGGATCTGGTTCGCCGCTTAACGCAGGAGCGA
GAGGAGCTGGCGGCGCAACACGAGATGGAGAGGGAAGAGATGAGCGAGGAGATCGCTGCC
CTGCAACAGGAGAGAGACGACATCCTCCTGCATGGCGAGAGCGAGAAACAGCAGGCGCTG
TCACTAAAGGAGTCGGAAAAAGCTTCGCTGAGTGAGAAATTAAGCAGCACTCAGCAGAGT
CTGGCTGCCGTCGGCCTGGAGATGGAGCGGCAGAAACGGGAATTCACCGTGAGGCAGGAG
CAGGATCGGACCACAATCATCTCCCTGAACTCGGATCTGAGGAACCTTCGAGTGCAGCTG
GAAGAGTCCGTGGCGTCTCACGAGAGAGAGCTCAGGGGTCTTCAGGAACACAGCAGGGAG
CTGGGGAAGCAGAGAGAGTCGGCACTGCGAGAGGTGGAGGAACTGAAGACTCAGCTGTGT
GTCGTGGAAGACGCCAGGGACGCCGTGCGCCGGGAGCTCATCGAGGCTCACAGGCGAATC
CGAGAGAGTCAGGAAGCGGCGGAGTTTCATAAGAAGGAGAACGCGGACCTGCGGAGGTCA
CTCGCCGACGAGGCCAGAGAAAAGGAGGCTGTGCAGAAATCCAACGAGGAGCTGCGCGGA
GCCGTGCGCCGAGCGGAGAGCGAACGCATCAGGTAA
>g75
ATGGCTTTCGCAAAGAACTCCAAAGATCCTTTTGGCAGCCACGTCGGGCGTTTAATAGCT
TCGGCGAACCGTGCAGCAGACTGGGGACAGTTCTTTAACATCTGTGATGTCATAAATTCT
ACTGAAGATGGGCCAAAGGACGCCATAAAAGCTCTCAAGAAAAGAATTGGGAAAAACTAC
AATCAAAAGGAAGTTCGTCTGAGTCTTTCTCTTTTGGACATGTGCATGCAGAACTGTAAA
CCGTCCTTCCAGTCCTTGGTGGTGAAGAAAGATTTTTGCAGGGACGTCCTTGTAAAACTT
TTAAACCCCAAATACAATCTGCCGCTCAACTTTCAAAACAAGATCCTCCACTTTATTAAG
ACGTGGTCCAGAGGCTCATTGCCAGGCGTGGATGTTACCGAGGTAAAAGAGGTATACCTG
GATTTGATAAAAAAAGGAATTCAGTTCCCGTCCCTGCCGCCTAACGGAGAGATATCCCTG
GAGACAGAGCAGGAAACCAAGTCTTCAGGTGCACCTTTAACCCCAACAACCCCAACGCCA
ACCATACAGAACCTTTCTCCTGAGCAGATTGGCAAGCTGTACAGTGAACTGGACATGGTG
AATATGAACCTAAAGGTCATGTCTGAGATACTACTCGAGAACACGCCTGGAAAAGAGAGT
CCAGACGACTTGAGTCTTCTACAGGAGCTGCACACGACATGTCGGGAGATGCAGAAGAGA
ATTCTAGCTCTTTTGGAGACGGTGCAGAATGAAGAAGTGATCGTGGAACTGGTGCAAGTG
AACGATGATTTGAACAATGTCTTCTTGAGATACGAGAGATTTTCTCGGACTAGATCTTAC
CAGGCAGCAGAAAACAGCAGAAAGGCTGAAACTGTGGTGGCAGACGAGAAAAAACCGTCG
GCTCCATCCAGCGAACTCATCGACCTTGAATCTTTATCAGAACCTGCGAATCAAGTTCCG
GCGTTTGGATTCCCGTTATCCCGCGATTATTTCCCTGCTCGAGGTTTACCACCTGCCGCC
ACGCAAGCTCCAGCTTACGGCGCGCAAGCCGCTCCAACGCCAGTCCCGCAAAATAATTTC
ATGTATCCGCAGATGGATCTGCTTGGATTAACGGAAGCCGTCAATACACCGTTTATGTTC
GGGGCGCAGGAGCAGGTCTCAAGTCTTCCTCCCAGACAGATCTATGATAACATTTGCATA
TCCACGCCTCTCATCCCGGCAGAAACCAGTCTGCCCCCTGCTCTCGTACCGTTACCTAGT
GAGGCTCCGCAGAAAGTGAACCGTAAATCAGATAAAGACAATTCGTTACCAAACTATTAC
GAGCTCCTGGAATTTGATCCTCTCGTGGAGAAGAACGAACCGGACACTGTTTATGAAGAA
ATCGACACATCGCAGTGGAACTCAAAGGCAGCGAAAATCGGTAATAACCTGCGGTACCCT
TGCAATGACGAGAAACCTAGGAGACGAAACACCAAACCCGCACATGCCTGA
>g88
ATGTTACAGTTAAAAGATCAGCCTGCCTCAATTGTCTGGAACCCTGGCATGAGTTTCACT
GAGATGACGGATCCCAAGACAAAAGAATGGCTGGCCAGGTATTTGGATCCTGTCTTCGGA
TACCCGCAGTTTGTCCGGTTCAGCTGGAGTACAGCCCAAACCATTCTGCAGAGCAGAGCT
GCCCCAGTCGTCTGGGCGGACGATGAGGACGCAGCTGCCGGCTCGACGGGTAAATCTTCC
TCCCAGCCTGTCCTCTCCTCGTACTTTTCATCCCAGAAGGAAGACTGTCAGCCCAAAAGA
CACCGGTTCTTCCAGGAAAGACTTTTGGAACCCCTGTCGGATCTGTAG
>g89
ATGCCTATGAGGTCCAATCCAGTTCAGGATGTAGACACCGTGGTGGCTCCAAACTCAATT
CTTCAACTTCCCCATCACTTGAGGTCAAAACGATACACTTTGACTCCAGGTCTACTGAAA
TGGAACCACTTCAACCTGACATACAGGATTGTATCATTCCCAAGAAATTTGATCAATGAA
AGCGACACCAGAAAGGGCATTGCTGCAGCTTTCCGCATGTGGAGTGACGTTTCTGCTTTC
CACTTCAAGGAAGTTCCTGCAGACCATGAAAGCGATCTAAAGATTGGGTTTTATGGTATC
ACTCACACAGACTGCTTGGAGTCATCGATCCATTACTGTTTTGATGGACCCACTGGAGAA
CTTGCACATGCCTACTTCCCACAAACCGGAGAGATCCACTTTGATGATAGTGAATACTGG
ATTTTGGGGAACACCAGATTCAGCTGGAAGAAAGGAGTATGGCTGACAGACTTGGTCCAT
GTAGCGGCCCATGAGATTGGACATGCACTGGGACTCATGCATTCCCTCAACAGCAATGCT
CTGATGCACATCAACGCTACGCTCACTGGGAAAAAGGACATCTCACAAGATGACGTATGG
GGGATATACAGTTTGTACGATTTCCCATTGCCAACAAAAATGCCAACTCCGGCACCACCG
AGAACTAAAGTCCGAATGGTGCCGGAAGGCAGGAATGTCACCTTCAGATGTGGAAAAAAG
ATTATACATAAGAAAGGAAAAGTTTACTGGTACAAAGACAAAGAGCTTCTGGAGTACTCT
TATCCTGGATACCTCTACCTTGCCGACGACCACATGAGCATCATTGCCAACGCCATCAAC
GAAGGTCTCTACACATGCATCGTTAAGAAGCGGGATCGAGTGCTCACAACATATTCATGG
AACATCCGAGTACCGATGTAA
>g92
ATGCTCGCAAATAAGCTCCATCGTGTGGCAGCCTTGTCTCGTCCCCAGTTTATTTACTCG
GCCTCAGGCTCCACTTTGAAAAATGGAATTTGCTTCTACTATGCTTCCCTTTACAATCTT
TCTGACGACATTCACACTCCCCAACCCACTCATGATGTCATTAATCGATATTTAGATTCA
CTGACTCTTCCTACACTTAATACAGACATGATCCGCTCTCTGGAATCCCCGTTGGAGATT
GAGGAGATTCGGACTGTGCTCTCCCAGCTCAAGACTAAGTCTGCCCCTGGCCCGGATGGT
GTTGAGCCGGGTTCTGTTGTGATCACAAGTCAGTCTGTCGATGCAACTTTTAAGCCTCAG
TTTGAGCAGATGATACTAGGAAAAACTGTAGTTCGTAACACCGAATTGGATCCTGGTTTA
ATCCAAGAACTGGTTCAATGTAGCAAAGAGATAAATGAATTCAATACAGTCATTGGAAAC
ACCATGTGCACAATGGATTTTTATGAAGGACAAGCACGTCTTGATGGTGCATTTTGCTCC
TACACAGAAGAAGCAAAAATTGAGTACCTGAAAGCAGCATATGAAGCAGGCGTACGAAAT
ATTGAGATGGAGTCATCTGTGTTTGCAGCAATGTGTAATATCAGTGGCCTGAGA
>g94
ATGTGGATCCACTTTGCCCCCCTCAACATTCCGCTCTCCAGGCGCCTGCAGACAGCTGCG
GTCCTACAATGGACGTTCTCATTTCTAGCAATGGCCCAGTGCTGCCTGGTCCTCTATGTC
CTCCTCATCTTCTCCCAGTACTGGTTTCTTGCGTTACTCTATGGCATCTGGCTGTACCTG
GACTGGGACACCCCATCGCAGGGTGGAAGGCGCTCGGAATGGGTCAGGAGGTGGACAGTA
TGGAAGTATTTTGCTGAATATTTCCCCATGAAGCTGGTGTGCACCGCCCCATTGGATCCT
CGTAACAATTACATCCTTGGATTCCATCCTCATGGGGTTCTAGTGGTTGGAGCCTTCGGG
AATTTCTGCACCGAGGGTACCGGCTTCTCCCACTTCTTCCCTGGGCTCACCCCTCATCTC
CTGATGCTGCCGGCTTGGTTCCGAGTGCCCTTCTTCCGAGAGTACATCATGAGTGGCAGT
AAGGACATCTCTGTTTCTGTCTCATATCTCAGTCGCTTTGGACCACTTTCTTACTTTGAC
GCCATGTACCCTACTCTGTTGTTCTCAGGTCTGGTGTCCTCGGATAAGGCCAGCGCCTCC
CACCTGCTGTCTAAGGAAGGTGGAGGCCATGCTTTGGTGATTGCAGTCGGAGGTCCACCT
GAAGCGCTAGATGCCAAACCTGGGCAACTTACCCTTCAGTTGCTCAAAAGGACTGGTTTC
ATTAAACTGGCTTTGATGCATGGGGCCCATCTGGTTCCAGTTATTTCTTTTGGGGAGAAT
GATCTGTACTATCAGGTAAATAATCCCCGTGGGTCTTTGCTACGAACCGCTCAGGAGAAG
ATGCAGAAGATTTTGGGAGTCGCACTGCCGCTCTTCCACGGTCGAGGCGTCTTCCAGTAC
AGCTTGGGCTTACTGCCCCATAGAAGACCCATCTATACAGTGGTGGGCTCGCCAATCCCG
GTGGAAAAAACTCCACATCCTACTACAGAACAGATAGCCTCTCTCCACGCTGCTTACATT
GAGAAGCTCCAGGATCTCTTTGAGGCTCAAAAGACTCGGTATGGAATTCCGAAAGATTGT
CAGCTGGTTCTATGCTGA
>g102
CTGGACCCAGCTCAGCCTTATTTCCAGAACACTCCTCCCGAGGTCCATTTGGATTTGTCT
GACGCTGACCTGGTTGATATCATCCACACTAATGGCGCTCCTTTTATCCCCAATTTAGGT
CTTGGAATGAGTCAGGTCATCGGCCACCTGGACTTCTTCCCCAACGGCGGAGAGCAAATG
CCTGAATGCCCCTTTAATGCTGGTTTACCGACCACTCCGGCCCCAACCATTGAAGATATA
TTTGCAGATCTCGCGAGCCCCTTGCTATGTAACCACGTGAGCTCCGTCCGGTACTATACA
GAGAGCATCACCAACCCCGACATCTATACCAGCTACCCCTGCGCTGATTACCCCACCTTT
CAGGCTGGCGGCTGCACAACCTGCCCCAGCGCCGGGTGTCCAAAGATGGGTCACTACGCC
GAGACCTACAGCGGCGTGACCTCCTCCAGCCAAGTGTTTTATCTGAACGCATCCTGA
>g108
ATGGCGGCCAAGTCGGACGGCATGTTGGGGGTCGGCTCCGGCTTCGCCCAGCTCCATAAC
CTGGACGAGGCTGCGGCTGCTGCGATGGGGGGCGAGGGGGACCCCGGGGAGAGCAGCTCC
ATCCACATCTGCCATTGCTGCAACACCTCATCGTGCTACTGGGGCTGCAGGAGCGCCTGC
CTCCGGTCCCTGCTGCGGAGGGGCAAGGGGTCCGGGGTCCTGGGGGGCAACAAGAGGGAG
AAGCAGGTGCAGAAGGGGGAGAGGGCCTGGTTAGACTGCCTTTGGATAGTGCTGGCCCTG
ATGGTCTTCTTCTGGGACGTGGGCACCGACCTGTGGCTGGCTGCAGACTATTACACCAAG
AGGGACTACCTGTACTCCTCCTTGACCCTGCTGTTCGTCCTGGTGCCCTCGGTGCTGGTT
CAGATCCTTAGCTTCAGGTGGTTCGCCCAGGATTATTCCGGGGGTGGGCTGGGGGCGGTG
GAAGGGCTCAGCAGCAGGGGACCCCCCATGATGGGGAGTACCCATCACTACCACCGACAC
CAGTACACAACGACCACCACCAGACCCGGGGCTGAGACGTTCTGCAGGATGTCTGTCTGG
ATCTGGCAGTCTGTCATCCACATCCTGCAGATGGGACAAGTGTGGAGGTAA
>g106
ATGGCCGCGTCCAACAGACTCATACTGGGACCCCTGGTGGGAGCTATAGATCAGGGCACA
GGATCCACAAGGTTTCTGGTTTTCAATGCAAAAACAGCAGAGTTATTAAGTCATCATCAA
GTGGAGATCAAACAAAAGTTCCCAAAAGAAGGGTGGGTTGAGCAAGACCCAAAGGAGATT
TTGCAGTCTGTTTATGAGTGTGTGGAGAAGACATGTGAGAAGCTTAGCCAACTGACCATT
GATATCACCAATATTAAAGCAATTGGAGTCAGCAATCAAAGAGAAACAACAGTGGTGTGG
GACAAGACCACCGGGGAGCCTTTATACAATGCCATTGTTTGGCTTGACCTGAGAACACAG
TCAACTGTTGAGAGGCTGTTAAAGAGAATTCCAGGAAAGAACAAGAATGTCTTCAAGAGC
CGTACTGGACTCCCCCTCAGCACTTATTTCAGTGCGGTGAAGCTCCGGTGGCTGCTGGAC
AATGTTGAAGAAATTAGGCAAGCGGTTGCAGAAGGAAGAGCCATGTTTGGAACCGTAGAC
TCCTGGATTATTTGGAGCCTGACTGGAGGGAAGACCGGAGGTGTTCACTGTACAGATGTT
ACCAATGCTAGCAGAACTATGCTGTTCAACATTCACACCCTTGAGTGGGACACAGAACTG
TGCCAATATGGTACAGGTTGTTTCTTGCTGTGCAACACCGGTTCAAAGCCTGTCTTGTCC
GAACATGGCCTTCTCACAACTGTGGCGTATAAGCTTGGTCGAGACAAGCCTGCTTGCTAT
GCACTTGAAGGATCTGTGGCCATCGCAGGAGCTGTAGTGCGCTGGTTGAGAGACAACCTT
GGTATTGTGAAGACTACTGAGGAAGTGGAAAAACTTGCTGCTGATGCAGGGACATCATAT
GGCTGCTACTTTGTTCCTGCATTTTCAGGGTTATATGCACCTTACTGGGAACCCAGTGCA
AGAGGCATCATCTGTGGTCTTACTCAGTTTACTAACAAGAACCATATTGCCTTTGCTGCT
CTAGAGGCAGTCTGTTTCCAAACCAGAGAGATTCTAGATGCCATGAATAAAGACTGCGGC
ATCCCTCTTAGCCAACTTCAGGTTGATGGGGGTATGACCAACAATAAGATTCTAATGCAA
TTACAGGCTGATATCCTGTGCATTCCTGTAGCGCTTGGAGCTGCTATGGCTGCAGGGGCA
GCGGAAGGAGTTGGCGTCTGGAGCCTGAACCCCGGAGATCTTACGGCAGTGACTTGTGAA
CGATTTGAGCCACAGATCAATCCCGAGGAAAGTGAATTTCGCTATGCCAGATGGAAAAAG
GCTGTGGTGAAGTCAATGGGTTGGGAAACCTCTGAGCCCTCTTCCAACGGGAATGCTATG
TACAAGACTTGTTGA
>g109
TCTCCACGCTTTCCCAGCCAGACCCGACGAGGAGTGAAAATGGCAACCCAGACCTCTGAA
GCCCAACGACCCAGCCAGGCCACCGGAAGCCGAGCCCAGCCTGCTGTGACCCCAGGGAGC
CCAGGGACGGTGGTCCTAAAGCTAAAGGAAGTGGAAGGCCGCACCCCCGACCTGGATGTG
GACACCTTCAGCAAGAAGGTAGTGCACGAGGGAGCAGGCTTCAGTCCAGCAGAGACCCTG
AGCGTCCAGTCGTTTTTGAAGGGAATGTTCCACGTAACGTTCATTTCAGCGGCGGTTTGC
AAAAGGTTCTGGGAAGCCTTCAGGGTGGCGAAACCGGACCAGGTTCTCTCCCGTTTCTCT
GGAAACAGCCCGATCCACCGGGAGGAGAGACCCGTGACGGTCTCGATGCGGAACCCTCAC
ACCCCAGGAAAAGGCGTGGCAACTTTTCTGGGAAGATACTGCCACGTTGTGAAAGAACCA
ACCAAGATCCTCAATCAGTACGGCTTCTGGACAGGAAGATGGTCCCTTGTGATCCGTCTG
AGGGCAGACTCCACCTCACCGGACGGGCTCCAACACCTTCCGCAGAGCTTCGCCCTGGAA
AATTCTACAGGCATGCTTTTCTACCCTGGACAGCCCACAACCTGCAGACGATGCAGCCAA
CTGGGACACAGGGCGGAGGAATGA
>g107
ATGGAAACCAAAAATGATGTACTTCCTATAGGTCTACAACATAAAGAAATTGATCGGATG
TGCAACCTTGCAAATGCTAAATCTATCAATCCACAACAAACATGTTATGTAAAAAATAAT
GTGGAAGGACATTTGGGTAGTCTGCAAGAAAACAGTGATATAGCAGTAGAAGGCGATGCA
ATGGATACCCTGATGTATAGTAGATACAGGTTAGGAGGTTCAGTTGAAAGCTTACTTTCT
CAGGCCTCCAACCAGAATATTGAACGGACAATTCTAAGGCACAGCAAGTCTCAAAATGCA
CTTGATTTTGATTTTAGAAACCACCAGGAATGCAGTGACAGTAAGCCTGAATACCCTAAA
ATTCCGGATGTTGTTGATGATGTAGTGGGTGATGAAGTTCTGTTAAAATACTTTGGGCAG
GTGTTTGAAGATGAGAGCCTTATGGAATGTAGGCTCAACAACTCACTGTCCTTCATATGT
TCTCAAGATGCAAGGATGCCAAAATCGAAATCCATGTCAGAAAACTTTACACCGCATAAG
GAGCACCAAGACTGTGAAAGACGTAGATACTCCCAAAATTCTTACAAAGCAGGACAGTGT
CATGACATGTACCAGGAGCCAATAGCCCCTTTATTACCTGTTGATGTGCAAGACAAAGAA
GCTATGCCACTGGAGCCAGTGTTTGAGCAAGCTAAGAACCCAGAAATTATTATCTCTTAT
GAAGAATTAGATTCTGCCCACACTCAGGCTGCTGAATCTGATGGATCACATAATATCTCT
GTGTCTCTCCTGAAATCTGTTCTCAAGGAAAGAGAGGTTAAAATAAATGATCTCAGCCAC
ATTTTAAAGAGGGAACGAACTGAAAAACTGCGCTTAATAGAGGAAAAGGAACAACTTCTT
TCCGAAATCGAAACACTTAGGAACGAATTTAAGGTCATGACATTTGATAAGGAGAGAAAA
AAACAAGATGCTTTTAATTCATTTGACCCCAACTCCCCTGTGGTTCTTCAAAAAGAAATT
GTTAACCTCAAAAGCCAGATAAATGACCTTCAAGAAGCCAATGAAAGTGCAGTTATAGAG
CTAGCCAAAGCTGATGAGGAGATTTCACAGAATAAGAAAGACATGGCCAGGCTTAAAGCA
GACTATAACCACAAACTAGAAGATTCTCATGAAGAAATCAAATTGCTTAAGGAAAAGATA
AATCAGATCCCAAACATATGCTGCCATACAGAGGATAACGATGATGGCCTTCTTAGGGAG
ATCTCCCAGCTGAGGAGTGAGTGCAGAAGACTGAGGACTCACAGTCATCAGCTGAGTGAG
CAAAACCACCATCTGCAGGAAGAGATGTGGGATATCAAAAGGAGATATGAATCTTTACTA
AAAAGAACAACATGTTTCCCAAGTGGGCAAGACAATGGAGAATCAGTCGGGCCACATACT
GATCTGTACAATAAAGGATCTTTCTCTAAAGACTGGATTTCTGAGGAGAACAGGTAA
>g110
ATGGTATCAGAGACAAAGGGACAGCCCGGGCAAAGCAGGAACTTGCCATGGGTGGAAAAA
TATCGACCGCAGACACTGGATGATCTGATTTCCCACCAAGACATCTTGAGCACAATTAAT
AGGTTTATCAGTGAAGACAAGCTGCCTCATCTTTTACTGTATGGACCCCCTGGGACTGGG
AAAACCTCCACAATTCTAGCCTGTGCAAAACAGCTGTACAAAGACAGAGAGTTCAATTCC
ATGGTTTTAGAGTTGAATGCCTCAGATGACAGGGGGATAGATATTGTCAGAGGACCTATA
TTAAGTTTTGCCAGCACAAGAACCATTTTCAAAAAAGGCTTCAAGCTTGTGATCTTAGAT
GAAGCAGATGCAATGACTCAGGATGCTCAGAACGCTTTGAGACGAGTGATTGAAAAGTTC
ACAGAAAATACGCGTTTCTGCCTCATCTGCAACTACCTGTCGAAAATAATCCCAGCTCTG
CAGTCAAGATGCACAAGGTTCCGCTTTGGCCCACTGAGTTCAGAAATGATGGTTCCCAGG
CTGGAGCATGTTGTTGAACAGGAGAGTGTGGACATTAGCCCAGATGGCATGAAGGCCTTG
GTGACACTGTCCAATGGAGACATGCGTAGAGCACTCAATATACTACAGAGTACAAACATG
GCTTATGGAACCGTGACCGAGGATACCGTGTACACTTGTACTGGACACCCACTGAGGTCT
GATATAGCCAATATTCTTGACTGGATGCTCAATAAGGACTTCAGTACTGCTTATAAGAAC
ATAATGGAACTGAAAACCTTGAAGGGGCTAGCACTCCATGATATTCTGACAGAAGTTCAT
CTTTATGTACATCGA
>g114
ATGGCTGCCATACGCAAGAAGCTGGTGATTGTGGGGGATGGGGCCTGCGGGAAGACATGT
CTGCTCATCGTCTTCAGCAAAGACCAGTTTCCTGAGGTCTACGTGCCGACGGTGTTTGAG
AACTACGTGGCCGACATCGAAGTGGATTCCAAGCAGGTGGAACTGGCGCTGTGGGATACA
GCGGGGCAGGAGGACTACGACCGCCTCAGACCTCTCTCGTACCCCGATACCGATGTCATC
CTCATGTGTTTCTCCATCGATAGTCCTGACAGTTTGGAAAACATCCCCGAGAAATGGACC
CCAGAAGTAAAACATTTCTGCCCCAACGTGCCCATAATCCTGGTGGGGAATAAAAAAGAC
CTGAGGAACGATGACCACACTCGGAGGGAGCTCGCCAAAATGAAGCAGGAGCCGGTGAAG
CCGGAGGAGGGCAGGGAAATGGCCAATCGGATTGGAGCGTTTGGGTATCTCGAGTGTTCG
GCGAAGACGAAGGACGGCGTCCGCGAGGTGTTTGAAATGGCGACACGCGCTGCGCTGCAG
GCCAAGCGAGGGCGGAAGAAGAACACGTGTGATCTCCTGTGA
>g80
ATGAGTTCCGATCAGGAAATGTCCGTTTTTGGGGTGGCCGCCCAGTTCCTCAGGAAATCC
GAGAAGGAGAGGATCGAGGCGCAGAATAAACCCTTTGACGCCAAGACATCTGTCTACGTG
AACGATGTTAAAGAATCGTATGTGAAAGGAACCCTTATGAGCAAGGAGGGTGGCAAAGCC
ACGGTGAAGACAGAAGGTGGACAGACTTTAACAGTGAAGGACGACCAGATCTACCCCATG
AACCCACCCAAGTTTGATAAGATTGAAGACATGGCCATGATGACCCACCTGAACGAACCG
TCCGTCCTGTATAACCTCAAAGAGCGTTACGCAGCCTGGATGATCTACACCTATTCCGGG
TTGTTCTGCGTCACCGTGAACCCCTACAAGTGGCTTCCCGTCTACAACCCGGAGGTGGTG
AACGCTTACCGGGGCAAGAAGCGCCAGGAGGCTCCACCACACATCTTCTCCATCTCTGAT
AACGCCTATCAGGCCATGTTAACCGATCGTGAGAACCAGTCTATCCTGATCACCGGAGAA
TCCGGGGCCGGAAAGACCGTGAACACCAAGCGTGTCATCCAGTACTTTGCGACAATCGCA
GCCGTCGGTGACAAGAAGAAGGAAGAGGCTTCAAAAAATAAGGGCACCCTGGAGGATCAA
ATCATCCAGGCCAACCCTCTGCTGGAAGCCTTCGGTAACGCCAAGACCGTGAGGAACGAC
AACTCGTCCCGCTTCGGTAAATTCATTCGGATCCATTTCGGCACCACCGGGAAACTGTCC
TCGGCAGACATTGAAACATATCTGCTGGAGAAGTCTAGGGTTACCTTCCAGCTGAAGGCC
GAGAGGAGCTACCACATCTTCTACCAGATAATGTCCAACAAGAAGCCGGAACTCATTGAA
ATGCTCCTGATCACAACCAACCCGTACGACTTTCCCTTCGTCAGCCAAGGTGAAATCTCG
GTGGCGAGTATCGATGACACGGAGGAGCTGATGGCCACTGATAGTGCCATTGATATCCTT
GGCTTCACCTCAGAAGAGAAGTTGGCTATTTACAAGCTGACGGGCGCCGTCATGCACTAC
GGCAACATGAAGTTCAAGCAGAAGCAGAGAGAGGAGCAGGCCGAGCCCGACGGCACAGAA
GTTGCTGATAAGGCCGCTTACTTGATGAACCTTAACTCTTCGGATTTGCTTAAAGCTCTT
TGCTACCCTCGAGTCAAGGTCGGAAATGAATATGTCACCAAAGGGCAGACAGTGCAACAG
GTTTACAACAATGTCGGTGCTCTGGGCAAAGCCGTCTATGAGAAAATGTTTTTGTGGATG
GTCACTCGTATTAACGAACAGTTGGACACAAAACAGCCTCGTCAGTTCTTCATTGGTGTG
TTGGATATCGCCGGATTCGAGATCTTTGATTTCAACAGCCTGGAACAGCTGTGCATCAAC
TTCACCAACGAGAAGCTGCAGCAGTTCTTCAACCACCACATGTTCGTCTTGGAACAAGAG
GAATATAAGAAGGAAGGGATCGAGTGGACGTTCATCGACTTCGGCATGGACTTGGCCGCC
TGCATCGAGCTTATCGAGAAGCCGATGGGCATCTTCTCCATCCTTGAAGAGGAGTGCATG
TTCCCCAAGGCAACAGACACTTCATTCAAGAACAAGCTTTACGACCAACATCTCGGCAAA
TCCAACAACTTCCAGAAGCCAAAACCAGGCAAAGGCAAGGCAGAGGCTCACTTCTCCCTC
GTCCACTACGCCGGGACGGTGGATTACAACATCTCTGGGTGGCTCGACAAGAATAAGGAC
CCGCTGAATGAAACCGTCATTGGGCTCTACCAGAAGTCTTCCATGAAAACTCTGGCTCAC
CTGTTCTCTAGCTACTCAGCAACAGAAGCAGAGGGGGGAGCCAAAAAGGGTGGCAAAAAG
AAGGGTTCCTCTTTCCAGACCGTGTCCGCTCTGTTCAGGGAAAATTTGAACAAGCTGATG
ACCAACCTCAGGACAACTCACCCCCATTTCGTACGTTGCATTATTCCCAATGAGACCAAA
ACCCCAGGGGCAATGGAACACGCGCTTGTGCTTCATCAGCTCAGGTGTAACGGGGTGCTG
GAGGGCATCAGGATCTGCAGGAAAGGATTCCCCAGCAGGATCCTCTACGGTGACTTCAAA
CAGAGATACAAGATCCTTAACGCCACCGCCATTCCCGAGGGACAGTTTATTGACAGCAAG
AAGGCTTCAGAAAAACTTCTGGGATCTATTGATGTTGACCATACTCAGTACAAATTTGGC
CACACCAAGGTGTTCTTCAAAGCTGGTCTCCTGGGTACACTGGAAGAGATGCGAGACGAC
CGTTTGGCACAAATCATCACTCGAACCCAAGCCAGGTGCAGAGGATACCTGATGAGGGTT
GAGTTCCAGCGCATGATGGAGAGAAGGGAGTCCGTCTTCTGCATTCAGTACAATATCCGC
GCCTTCATGAACGTCAAGCACTGGCCATGGATGAAGCTCTACTTCAAGATCAAGCCTCTC
CTGAAGAGCGCCGAGTCCGAGAAGGAGATGCAAAACATGAAGGAAGAGTTTGCGAAGACA
AAAGAAAGTCTGGCAAAGTCAGAAGCTAAAAGGAAGGAGCTGGAGGAGAAAATGGTTAAA
ATTCTCCAAGAGAAGAATGACCTCCATCTTCAAGTCCAGTCTGAATCGGAGAACTTGATG
GACGCGGAGGAAAGATGCGATCAATTAATTAAAACCAAAATCCAACTGGAGGCCAAAATC
AAGGAGCTGAACGAGAGGCTGGAGGATGAGGAAGAGTCGAACGCCGAGCTGACGGCCAAG
AAGAGAAAGCTGGAGGACGAATGCTCCGAGCTGAAGAAAGACATCGACGACCTTGAGTTG
ACTTTGGCCAAGGTTGAGAAGGAGAAACACGCCACAGAGAACAAAGTAAAAAACCTTACA
GAAGAAATGGCTGTTTTGGATGAAAACATTGCTAAACTTACCAAGGAGAAGAAAGCCCTT
CAAGAAGCCCACCAGCAGACTCTCGATGACCTGCAGGCAGAAGAAGACAAAGTGAATACC
CTGACCAAAGCAAAGACCAAGCTGGAACAGCAAGTGGACGACCTTGAGGGGTCTCTCGAA
CAAGAAAAGAAACTGCGCATGGATCTCGAAAGGTCCAAGAGGAAGCTTGAAGGGGATCTT
AAATTAGCCCAGGAAACCATCATGGACCTTGAAAATGACAGACAGCAAATGGATGAGAAA
ATTAAGAAGAAGGATTTTGAAATCAGCCAATTTATGAGCAGAATTGAGGATGAGCAGGCA
CTTGGCGCTCAACTTCAGAAAAAGATTAAAGAATTACAGGCCCGTATCGAGGAACTGGAA
GAGGAAATCGAGGCCGAACGGACTGCGAGAGCCAAGGCCGAGAAACAGCGATCCGACCTC
TCCAGGGAGCTCGAGGAGATCAGCGAGCGTCTGGAAGAAGCCGGTGGAGCAACCTCCGCT
CAGATCGAGATGAACAAGAAGCGCGAGGCCGAGTTCCAGAAAATGCGCCGTGATCTGGAA
GAGTCCACCCTGCAACACGAAGCCACAGCCGCCGCTCTCCGAAAGAAGCACGCCGATAGC
TCGGCGGAACTCGGAGAACAGATCGATAACCTCCAGCGTGTGAAGCAGAAGCTGGAAAAG
GAGAAGAGCGAACTGAAGATGGAGATCGACGACCTGGCCAGCAACATGGAAACTGTATCA
AAGGCCAAGGCCAACTATGAAAAGATCTGCCGCACCCTCGAGGATCAGCTGAGTGAAGTG
AAATCGAAGGAAGAGGAGCACCAGCGCCAGATCAATGAAATCAACGCCCAAAGAGCGCGT
CTGCAAACAGAAAACGGGGAATTCTCCCGACAGCTGGAAGAAAGAGACACCTTAATCTCC
CAGCTGTCTCGCAGCAAACAAGCCTTTACCCAACAGATTGAAGAGTTGAAGAGACAGCTA
GAAGAGGAGACTAAGGCCAAGAACGCCCTCGCTCATGGTCTACAATCTTCCCGCCATGAC
TGCGATCTGCTCAGGGAGCAATATGAAGAGGAGCAGGAAGCCAAGGCCGAGCTCCAGAGA
TCCTTGTCCAAAGCCAACGGAGAAGTCGCCCAATGGAGGACGAAATACGAGACGGACGCT
ATTCAGCGCACAGAGGAACTGGAGGAAGCCAAGAAGAAACTTGCTCAACGTCTTCAGGAC
GCAGAAGAGCAAATCGAGGCGGTGAATTCCAAATGCTCTTCGCTTGAAAAGACCAAAGTC
AGACTGCAGAATGAAGTGGAGGATCTTATGGTGGACGTGGAAAGGTCGAATAGCGCCTGC
GCCGCTCTGGATAAGAAACAAAAGAACTTTGACAAGATTCTTGCAGATTGGAAACAGAAG
TATGAGGAGTCACAAGCAGAATTGGAAGCTTCCCTGAAGGAAGCCCGATCTCTCAGCACA
GAGTTATTCAAGATGAAGAATGCCTACGAGGAATCTATGGATCACCTGGAGACCGTCAGG
AGAGAGAATAAGAATCTACAACAGGAGATTTCCGATCTTACGGAACAAGTATCTGAAAGC
GCCAAGAGTCTGCATGAAGTGGAGAAGGCCAAAAAACAGATTGAGCAGGAGAAAAGTGAA
ATCCAGTCTGCCCTTGAAGAAGCAGAGGCTTCCCTTGAACACGAAGAGGGTAAGATTCTC
AGAATACAGCTCGAGCTCACCCAAGTGAAATCCGAAATCGACAGGAAGATTGCCGAGAAG
GATGAAGAAATCGATCAGCTGAAGAGAAACCATATAAGAGTGGTGGAGTCCATGCAGAGC
TCGCTCGACGCTGAAATCAGAAGCAGAAACGATGCCCTGAGGTTAAAGAAGAAAATGGAA
GGAGATCTCAATGAAATGGAGATCCAGCTCAGCCATGCCAACCGCCAAGCCGCAGAATCT
CAGAAGCAGTTGAGGAACGTCCAGGGAATACTTAAGGATGTCCAAATCCACCTTGATGAT
TCTCTCAGGAGTCAAGAAGACCTGAAGGAACAGCTGGCCCTGGTGGAGCGCAGAGCTAAC
CTGATGCAGGCTGAGATTGAGGAAATGAGGGCCGCTCTAGAACAAACAGAACGGAGCAGG
AAGGTGGCTGAGCAGGAACTGCTGGATGCCAGTGAACGCGTCCAACTCCTACACAGTCAG
AACACAAGTTTGATAAACACCAAGAAGAAGCTGGAGACAGACATCGCTCAGCTGCAGTCA
GAGGTGGAAGAGTCCATACAAGAAGCCCGCAACGCAGAAGAGAAAGCTAAGAAAGCAATC
ACTGACGCTGCCATGATGGCTGAGGAGCTGAAGAAGGAGCAGGACACCAGCGCTCACCTC
GAGAGGATGAAGAAGAACCTGGATCAGACCGTGAAGGATCTCCAGCACCGGCTGGATGAG
GCTGAGCAGCTGGCGCTGAAAGGAGGCAAGAAACAGCTCCAGAAACTGGAGGCCAGGGTC
CGCGAACTGGAAAATGAAGTGGAGGCAGAACAGAAACGCAGCTCTGAAGCCATCAAAGGT
GTCCGTAAATATGAGAGAAGAGTAAAGGAACTCACGTACCAGTCTGAGGAAGACAAGAAG
AACGTCATGCGGCTGCAAGATCTGGTGGACAAACTTCAGCTGAAAGTCAAGGCTTACAAG
AGGCAGACCGAGGAGATTGAGGAGCAGTCTAACATGAATCTGACCAAATACCGCAAAGTT
CAGCACGAGCTGGAAGAGGCCGAGGAACGCGCCGACATCGCAGAGTCTCAGGTCAACAAG
CTCCGGGTGAAGACCCGCGAAGTCACCAAGATCGTGAAAAGCGAGGAATAG
>g120
ATGAGAGAGTGCATCTCAATCCACGTGGGCCAAGCCGGAGTGCAGATCGGCAATGCATGC
TGGGAGCTGTACTGCCTAGAGCACGGGATCCAGCCGGACGGACAGATGCCCAGTGACAAA
ACCATAGGCGGTGGGGACGATTCCTTCAACACCTTCTTCAGCGAGACGGGGGCTGGCAAA
CATGTCCCCCGAGCCGTCTTTGTGGATCTGGAGCCAACAGTGGTGGATGAAGTGCGCACC
GGGACGTACCGCCAGCTCTTCCATCCTGAGCAGCTGATCACCGGCAAGGAAGATGCCGCT
AACAACTACGCACGTGGCCATTACACGATCGGGAAAGAAATTGTCGATTTTGTTCTGGAC
CGCATCCGTAAACTAGCTGACCAGTGCACAGGCCTGCAGGGCTTCCTCATTTTCCACAGC
TTCGGTGGCGGCACTGGCTCCGGATTCGCTTCTCTGCTTATGGAACGGCTTTCTGTAGAT
TATGGTAAAAAATCGAAGTTGGAGTTTGCCATTTACCCAGCACCACAAGTATCAACAGCT
GTAGTGGAGCCGTATAACTCCATCCTCACCACGCACACCACGCTGGAGCACTCTGACTGC
GCGTTCATGGTGGATAATGAGGCCATTTACGACATCTGCCGCAGAAACCTAGACATCGAG
CGCCCGACGTATACGAACCTCAATCGCCTCATCGGGCAGATTGTGTCCTCCATTACGGCT
TCGCTCAGGTTCGATGGGGCTCTGAACGTGGACCTCACTGAATTTCAGACAAACCTTGTC
CCATATCCACGGATCCACTTCCCTCTGGTCACATATGCCCCGGTTATCTCTGCCGAGAAG
GCGTACCACGAGCAGATCTCTGTAGCCGAAATCACAAATGCCTGCTTCGAGCCCGCAAAC
CAGATGGTGAAGTGCGACCCTCGTCATGGCAAGTACATGGCCTGCTGCATGTTGTATAGA
GGGGATGTGGTGCCCAAGGATGTGAATGCTGCTATCGCCACCATAAAGACCAAGCGCACG
ATCCAGTTTGTGGACTGGTGCCCAACAGGATTCAAGGCTAGTATCTGGGAGGGTTAA
>g104
ATGGATGCCAAAGGATTTTGGACATTGGTGCAGGAAAAGAAGACATCTCTGATTCCAAAA
GGTTACCATTTGTCTCAGCATGAAGACATGTCGTCTTCACCTGTGTCAGAGGAGGAGAAG
GAGAAGGAGGAAATGGAGGGCTGTCCATGTGTAACAAAGATTGAAGTGACTGTCACTGTG
GAACCAGAGGCGCCGGCAATCGACGGGATCCGGGTAACCATGGAGAGTGCCTTAACGGCT
CGGGACCGGGTGGGGGTCCAGGACTTCGTCCTGCTGGAGAATTACACCAGTGAAGCGGCA
TTCATTGAAAACCTGAGGAAACGATTTAAAGAGAATCTTATTTATACATATATTGGATCA
GTTTTGGTGTCTGTCAACCCATACAAAGAGTTGGAGATCTATAGCAAACAACACATGGAG
AGATATAGGGGAGTCAGCTTCTATGAAGTGTCTCCACATATCTATGCCATCGCAGATAAC
TCTTACAGATCGCTACGCACTGAGAGGAAAGACCAGTGCATCCTTATATCTGGGGAGAGC
GGAGCGGGAAAGACAGAGGCCAGCAAAAAAATCCTCCAGTACTATGCTGTGACGTGTCCG
GCCAGCGACCAAGTGGAAACTGTGAAAGACAGACTCCTGCAGTCCAACCCCGTTTTAGAA
GCATTCGGCAATGCAAAAACCTTAAGGAATGACAACTCAAGCCGCTTTGGGAAATATATG
GATGTGCAGTTTGACTATAAAGGAGCCCCAGTGGGAGGACACATCCTGAATTATCTCCTA
GAGAAGTCACGTGTGGTGCATCAAAACCATGGAGAGAGGAACTTCCACATCTTCTACCAG
CTACTTGAGGGAGGGGAGGAAGATCTATTGCGCCGACTGGGTTTGGACAAAAATGCCCAG
AACTACCAGTATCTGGTGAAGGGTCAATGTGCCAGGGTCAGCTCCATCAATGATAAGAGT
GACTGGAAGGTGGTTCGAAAGGCTTTGTCGGTCATCAACTTTAATGAGGATGATGTGGAG
GAATTGCTGAGCGTTGTGGCCAGCGTCTTACATTTAGGAAATGTTCAGTTTGGCGCAGAC
GAGCAGGGCCATGCACAGGTCACAACCGAAAATCAGATTAAATACCTTGCTAGGCTTTTG
TCTGTTGAGAGTGCTGTGTTGCGTGAATCTCTCATACACAAGAAGATTATTGCTAAAGGG
GAGGAACTAAACAGCCCTCTGAACCTGGAACAAGCAGCGTATGCGCGAGATGCTCTGGCT
AAAGCTATATACGGACGCACATTTTCCTGGCTTGTCAGCAAGATTAACAAGTCCCTTGCT
TACAAGGGTGGAGATGTCCTGAGCCTTAATGCATCAGTCATAGGACTCCTGGACATTTAC
GGGTTTGAAGTTTTTCAACATAACAGCTTTGAACAATTTTGCATTAATTACTGTAATGAG
AAACTACAGCAGCTCTTCATAGAACTGACCCTAAAATCTGAGCAGGAGGAGTATGAATCT
GAAGGAATTGCGTGGGAACCTGTCCAGTATTTTAATAACAAAATCATCTGTGACCTGGTT
GAAGAAAAGTTCAAAGGCATTATTTCGATTTTGGATGAAGAATGTTTGCGTCCCGGAGAT
GCAACAGATATGACATTCCTAGAAAAGCTAGAGGACACTGTGAAAAATCACCCACACTTT
GTGACGCACAAATTGGGTGACCAGAAAACCCGAAAATCTCTTGGGAGAGATGAGTTTCGG
CTGCTGCACTATGCTGGTGAAGTAAACTACAGTGTAGTAGGATTTTTGGATAAAAACAAT
GATCTACTGTTCCGTAATTTGAAAGAGGTCATGTGTGACTCAGGAAACCCAATCGTACAT
CAATGCTTTGACAGATCTGAACTAACTGACAAAAAAAGGCCTGAGACGGCAGCAACTCAG
TTTAAGAATAGTTTATCTAAGCTGATGGAAATCCTCATGTCCAAGGAGCCCTCTTACGTG
CGATGCATTAAACCAAATGATGCCAAGCAACCAGCTCGATTTGATGAGGTTCTTATCAGA
CACCAGGTGAAGTACTTGGGTCTCATTGAAAATGTACGTGTTCGCCGTGCTGGATTTGCA
TATAGGCGCAAATATGAAGTTTTTCTGCAGAGGTACAAACCCCTTTGTTCTGAAACATGG
CCAAACTGGAATGGAAGAGCACACGATGGCGTGTTGGTCCTAGTGAAGAGCCTGGGTTAT
AAGCCAGAAGAATTTAAAATGGGCAGGTCTCTGGAACGAACCTTGGCATTCATCTATTCT
AAATACAGTCTTTTATCTTTAGCTGTAACTATCCAGTCTTGGTGGCGTGGAACAGTTGGG
CGCCGAAAAGCAGCCAAAAGGAAACGGGCTGTAGAAGTCATTAGGAGATTCATTAAAGGC
TTTATTTATCGGAATTATCCCCGTTGCCCCGAGAACGAGTACTACCTGGATTATATCCGC
TTCTCTTTCCTGATGAATCTATATCGTAATTTGCCAAAGAATGTGTTGGACAAGTCTTGG
CCAACACCTCCTCCATCACTGAAAGAGGCATCAGAACTTCTGAGAGAGATGTGCATGAAG
AACATGGTGTGGAAATACTGCAGGGGAATCAGCCCTGAATGGAAACAGCAGCTGGAGCAA
AAAGCAGTTGCCAGCGAGATCTTCAAGGATAAAAAAGACAATTACCCACAAAGTGTTCCA
AGACTCTTCATAAACACAAGACTTGCCAATGAAGAGATCAACACAAAAATTCATCAAAAT
TTGGAAAACCAGACACTTATGTATGCTGTTCCTGTTGTGAAGTACGATCGGAAGGGCTAC
AAACCCCGAAAGAGACAGCTGTTGCTAACTCAGAATGCTGTCTACATCGTGGAAGAAGCC
AAACTAAAACAGAGAATTGACTATGCCAATCTGACAGGAATCTCTGTCAGCAGCCTGAGC
GACAACCTATTTGTTATTCATGTGAAATGCGAAGATAACAAACAAAAGGGTGATGTGGTG
CTGCAGAGTGATCACATGATTGAAACATTGACTAAAATTGCCATAACTGCTGAGAAAATC
CACAATGTCAACATTAATCAGGGCAGCATCAAGTTTACAGTCGGGCAGGGTAAAGAAGGA
ATTATCGACTTCACACCAGGCTCAGAGTTGCTTATAGCCAAAGCAAAGAATGGACACCTA
TCTGTGGTTGCCCCACGGTTGAATTCTCGATGA
>g116
ATGAATGGGGAGGAAAAAATGCATGAGGACGACGGAGAACCTTGGCTTCCTGTGCAGAGG
GAGCGCTCGTACACCACCGGCTCCCTGTCTGACAGCTCTGGGCTGAAGAGGCGAAAGCAG
GGAGAAGCCCCCCCAAACCAGGTACCGGAGGAAAAGGATCTAAAAGCTCATGCTGTGCTC
TCCATCTGTGACATGCAGGAGCCCAGCAATAAGAGGGTTAAACCTGTCACCAAAGCATTG
TCGGCGACGAGCGCCCCCCACAAAACTAAAATCACCCCCCTGAAGAAACTCAGCCTTTCC
ATCCAGCGCTCCATTGGCAATAAGAACGACAGCTGCCTGTTCAGCTTTTCTCCTCGAAAC
CACAGCCCTGGAAGCGGAGGGAAAAAGAGGGGCAACAAGCTGTGGAGCGAGACCTTTGGC
AACTCGAGGGAGGAGCTGTCTGCACGAGAGGTCAAAAGACAGGAGAAGGGGTATCTGCCG
CAGGTGATCTTTGAGATGACACAAGGAGAGCATCAACTGATAGAGGATCTCAACCTGGTC
AAGAAGAATTACTATGAGCCCATGTTAAAGCTCGAGATCATGTCTCCGGAGGAGTTAAAC
CAGATCTTCGGCATCATCGACACGCTGCCCCCGCTGCACCAGGATCTGCTTAATAGGTTA
CAGTGCCTAAGGGGAGAGGACGGCACCGTGCGCCAGGTGGGACCCACTCTGCTGGACTGG
CTGCCCGGCCTTCACTCCTACGATGTCTACTGCAGTAACCAGGTGTCTGCCAAAACGTTG
CTAGATCTCAAGAGGCGCGAGCCCGCGGTGCACAACTTCCTGCGCCTGTGCCAGGAATCA
GCGTTCAGCCGCAAGCTGGACCTGTGGAGCTTCCTGGACCTGCCCCGGAGCCGGCTGGTC
AAGTACCCGCTGCTGCTGAAGGAAGTGCTGAGACACACGGGGCCAGAGCACCCGGACCAC
ACTCCGCTCACCCAGTCGGTCCTCATGGTCCAAGAGATTGTTACCCACATTAATAGAAAG
ACGGGCGAGGCAGAATGCGACTCCTATCGCAGGAGGCTCTCCTATCTGTACGAGAGTCAG
AATGAAGGCGACGTCTCTCGCTCGAACCTCCTGCACTGCCATGGGGAGCTCAGGAACAAC
AAAGGGCAGGTGGGCAGCACGCTGGAGACACCGCGGAGGGTCACTGAGGCCTCGGGCTGG
CCCTCTAGGTCATTGTCCTCCAAGCTTTATGGATGTATCTCCATTGGGTTAAATAAATAT
GCCAGCGGGAGTCCCTTTCTAATGTCCGTTGTCCCACCTTTACACCAGAGGCTCCACGTC
TTCCTTTTTGAGAAGGTCCTCGTCGTCACTCGGCCCATGTCACAAAATGACCAGCTGCAG
TTCCAGGTGTATCGGCAGCCAATACCTTTGCTGGAACTTGTGCTGGAGGACCTGCCAGAC
GGTGAAGTGAGAATTGGAGGCTCCATCCGCGGGGCTTTCACCCCCACTAATGAACGAGCC
AAGAATTTCTTCCGTGTGAGCTTCCGTGACCGGACGAGGGGACAAGCTCACACCTTACAA
GCCAACGACTCTTTTAACAAGCAGCAGTGGGTTAGCGCCATACGGCAAGCCATGGTGGCA
AGCCGAGACCACAGATCCAAACAGGGATCCCCCCAGGATCTACCCTGCACGCTAATGAAT
ATCTCTGACCTGAAACTGAGCTGCCATGAAGACCACACAGAGAGAGAAGATGGAAAGAGG
GGAACGGGCCACTTCCACGAGTGA
>g126
ATGCCTCTGACGTTTAAGGGATCAAGATACTTCCTCTGCGACACCGTTTTCCTCTGGAAA
CCGTGCGTATGGCAGGTAGAGTTTCCAGAAGATCCTTATGGCTGGAATTCTGGGGTGTGT
GACTTCCTACAGGAATGGGCCAAGATGTTTAAGGATCTATCTGGAGAGTACGGCTTCTTG
GAGAAGATCTACCACTGTGTCTTTGCCGGAGCTAGAAACCTGCATGTGACTGGACAGGAT
GAGAACACACTGGAGCTGACCTTCAGAGGAGCAGAGCACAAGCTGTTGCTAACAGGGACA
CCATTCCGTATGGACATACTTTCAGGAAGAGACTTGGTCTTGAGTGTGAATTCACGAGGA
CTGCTTCATTTTGAACGCTTGAGGGAGAGGAAGAACAATGACCCTGAGAAGATTGATAAG
CCCCTTGAAGGAGATGTGAACCCAGGAGAGGAGGCAGGAAAAGAAGAGGGAAGTAAAAAG
GAGGAGGAGGATGACGAGCCAGGAATGTGGGACGAGACGTTCAAAGGTCATACAGACACA
AAACCATATGGTCCCTCCTCGGTGGGTCTAGATTTCTCTCTACCAGGTTTTGAACATGTT
TATGGCATTCCAGAACATGCTGATAACATGAGATTACGAACTACAGAGAGTACAGATCCA
TATAGGCTCTATAACCTGGATGTTTTTCAGTATGAGTTGTATAATACCATGGCTTTGTAT
GGCTCAGTCCCACTGCTTCTTGCTCACAACATTCATCGCACTTTGGGGATATTCTGGCTA
AATGCTGCAGAGACTTGGGTGGATATCAGTTCCAACACAGCTGGCAAGACTCTTCTGGGC
AAGATGTTGCAATACATGCAGGGAGGCGGAGATACTCCTCAGACAGACGTGCGTTGGATG
TCAGAGAGTGGGATCATTGATGTATTTTTGCTTCTAGGACCCTCGCCTTCAGATGTGTTC
AGACAGTATGCCAGCCTTACAGGGACCCAATCTTTGCCCCCATACTTCTCACTTGGGTAC
CACCAATGTAGATGGAATTACAATGATGAGGAAGATGTACACAATGTAGACTCTGGGTTT
GATAAACACAACCTGCCTTATGATGTGATCTGGCTGGATATAGAACATGCTGATGGAAAA
AGATACTTTACCTGGGACCCGCACAAGTTTCCAACTCCTAAAAACATGCTGAGCAATCTG
AAGGACAAGAGACGTAAGATGGTTGCTATTGTTGATCCTCATATTAAGATAGACGGTAGT
TATAGAATTCACAACGAGATCCGATCCCATGGTTTCTACGTCAAAAACAAAGATGGTGGA
GATTATGAGGGTTGGTGCTGGCCAGGCTCTGCTGCCTATCCAGACTTCACAAACCCAGAA
ATGAGAGCTTGGTGGTCTAGTATGTTTTCATATGATCAGTATGAGGGATCCATGGATAAT
CTGTTCATCTGGAATGATATGAACGAACCATCAGTTTTTAATGGTCCTGAAGTAACAATG
CATAAAGATGCTGTTCACTGGAGAGGCTGGGAACACAGGGATGTGCATAACCTGTATGGG
TTCTATGTGCAAAGAGCTACAGCTGAGGGTCTGATCCAGCGCTCTGGGGGTAAGGAGCGA
CCCTTCGTATTGACCAGAGCATTCTTTGCAGGTTCACAACGCTATGGTGCTGTGTGGACT
GGTGACAATGCTGCAGAGTGGGATCACCTGAAAATATCCATCCCTATGTGCTTAAGCCTG
GCTCTGGTTGGCATTTCATTTTGTGGAGGTCACCAGATTCGCGGTCACAGTATGTCCACC
TTTGTGGTGATCCCTCCTCCTTTGTCAGGCTATCCTTGTGATTACATTAACCAGCTTCCA
CATTCACTTGGTCTAGCCGCAGTTCCAGCTGATGTTGGGGGATTTTTCAAAAACCCAGAA
CCTGAATTACTTGTTCGTTGGTATCAAGCTGGAGCTTATCAGCCTTTCTTCCGTGCTCAT
GCTCACCTGGACACTCCTAGACGAGAGCCATGGCTTCACGGAGAGGGAAATCTGGAACTG
ATACGTGAGGCCCTCCAGCAGCGTTATGCTTTGCTCCCGTTCTGGTATACACTGTTCTAC
AGAGCACTGCGTGAAGGAGAGCCAGTCATGAGGCCTCTGTGGGTTGAATTTCCATCCGAT
GTTTCTACGTTTGCTATGGATGATCAGTACATGTTAGGTGAGTAG
>g141
ATGGCAAAAGTTTCAGACCTATATGATGTTACTTGGGAAGAAATGCGAGACAAAATGAAA
ACATGGAGGGAAGAAAACTATCGAAACAGTGAACAGATTGTTCAAGTTGGTGAAGAATTG
TTAAATGAACACGCTTCGAAACTTGGAGATGACATTTGGATAATACATGAACAAGTGTTG
ATTGCTGCACTGGACTGTGGCCGTGACGATCTAGCAATGGAGCTGAGAAGACAATTTCCT
GGCAGTCACAGGGTGAAGAAACTAACCGGCTTACGATTTGAAGCAATGGAAAGGTATGAT
GATGCACTCCAGATATATGACAGAATATTACAAGAAGATCCAACCAACACAGCAGCCAGA
AAACGAAAGATCGCCATTCGAAAAGCCCAGGGACGAAACACCGAGGCCATCCGAGAGCTG
AATGAGTATCTGGAACAATTTGTTGGCGATCAGGAAGCCTGGCATGAACTCGCAGAACTT
TACATTAATGAACTTGACTATGCAAAAGCAGCTTTCTGTTTGGAGGAGCTTATCCTGACT
AACCCACACAACCATTTCTATTACCAGCAGTTTGCAGAAGTGAAATATACTCAAGGTGGA
CTTGAAAATCTTGAACTGTCTAGAAAATATTTTTCCCAGGCTCTGAAGTTGAACAATCAG
AGTATGAGATCATTGTTTGGACTTTACATATCCTCTATTCACATTGCATCCAACCCAAAA
GCCAGTGCAAAAATGAAGAAGGACAATGTCAAGTATGCCTCATGGGCAGCAAATCAGATA
AAGAGAGCTTACCAGATTGCAGGTCGCAGTATGAAAGAAACGCAGTTTTCATTAAAAGCA
GTAGAAGATATGCTGGAAACTTTGCAGATTACACAATCCTAA
>g145
ATGGCTGAATATCACATCCTTATTGTACAGGAGGAGATAAAATCCAAAATGCCTGCATTT
CAGACAAAACAAGCTGAAGCTAATGTGTGCGTGACAATGGAAATGGTGAAAGATGCTCTG
GACCAGCTCCGAGGGGCGGCCAGCCAACAAGTTATCGAAGAACCTGCCGCTCAGTTATGG
TGGGCCGGCAAAGAGCTGCAAAGGAATAAGAAGCTTTTGGATTTTGTGGGGAAGAATGAG
AAAACCAAAATTATTGTTAAGATACAAAAGAGAGGTCAAGGAGCTCCAGCACGTGAACCA
GTTGTCTCAGAAGAAGAGCAAAAGAAATTAATGTTGTATTACCATAGAAGACAGGAGGAA
CTTAAGAAACTTGAAGAGGATGAAGACATCTCATATCTGAATTCTGATTGGGCCGATAAT
CACTCCTTAAAAAGGCAGTTTCAAGGAGTAAAGGACATTAAGTGGAGACCACGATAA
>g143
AGTTCTGGAGAGCTGACGCAGAGTGCCGACGATGAGTGCTTCCTCGATGCTCCTCTTCTG
CCCTCACAAAAGCTTCAGCCTGAAATTAGGCCAACATTTCGCCCTGTCCCTACAGTGACT
GTTGCCATTTTGCTAGCTTTTCTACAGTTGGCATTCGTAACTCTGGTGGTCGTCTCCGCT
TACTTTTGTTCGTATGCTGGGAATGAAGTAAAATGCAAGCCGTACATTCAGCCATTTAAA
CTGAATACAATTGTGGTCATTGCCAAAGTTGTCCTGTGGATACTCCATGTGTTGAACGAG
AGGTTTGTTCAGTATCACCACTACAAAATCAGAAACCGCGGCTACCTTAATGTCTATCGG
TCCACCCGGCATCTCAAAAGCCTTTCTTTAATGATTCACTCAACAGGCAATGCAGCTATA
CTGGTGATAATCTCTGCACAGGACTCGTTTAAAAGCAGTGCTCACCTGTATCTCCATTTA
ATTCTGAGTGTCCTGATACTGGAGTTGATCCTATCTCTGGCCTGTCTTCTTATGTATGCA
GTGAAAATATATAGATTCAACAGCAGTATGCCTCGGCCAGATATCATTGAAGAGGAGAAG
ATTCATGCATATCAAAGTCATTTAAATCCAGAAATTGGATTC
>g142
ATGGATGACGAATCATTTGAGCCTACAGTGGACACAACAAAGGAAACTAGTTCACAAGGA
TATGAACTTATTGATTCCGCTATTGACTTAGAGATTACATGTGTGGAATCAGATGTAAAA
GATGTTGAGATCTCTATGGACAATTCAAAGTCTAGAGCAGACATTATACATAAAAGAGCA
CACAATGTTCATCATCTTGTTGTAATGGTTCCTTCTAAAGAACCAGATGGAAACTATAGC
GCACCCTTCCAGTTTGACAGACTGGCACCAGCAAGGATTTCAACTAGTCCCACATTAAGG
AGATTACGCAAAAACACTCATAGACATTTTATGCCACTGCAGGATTTCTTTGACTCGGCC
AAGTTTGCAACTCACAAAGAACAATCCAACTTGGAAAGTTCTGAGGGATACCTTTTTGAA
ACTCCCCCTTGGAGTCCCAAATACACAGAACATTTCTCACCACATTTTTGTGAAATCCCA
ATAGAGTCTTCCAAAGTTGTTAATGCATTTAGTGAACCTCAAAACCAAGAAGAAAAGGTC
AACAATGACAAAAACATAGATAACCTAGCTCCGCACAGTAACCCTGAAGGGGAGGAGAAC
ATTCCACTGAGCTTTGAGGAGGACAATGCTATCAATTCTACAAGAGAAAATCCTCCAGAT
TCTAACAGTGTGCAGAGCTGTACACAGATGAAAGAATTGCTCCAGTCTCGGTAA
>g146
ATGGATCAAAAGCATAAAGTATTGTTGACAAAGCTGCGCCTGGAGCTATGCGCTGAAGCC
CTAGCTGATGGCCTTGTACCACAGTATCTTTTTCAAGAACTTATTATCACAAGTGATCAA
CTAGAGCAGATATGCACACAGGCCACCAGCCAAAGGAGAACAATGAAGCTCCTAGATATT
TTGCAAACCCGTGGACCAAATGCTTTTAAGGTTTTCCTTGAGTCCTTGTCAGAGTTTCCA
TGGATGTTGGGACATTGTTCGAAAAAATCAGCGAAAATGCCCAACTTTTTTGACTCTAAA
CTTCGCAAGAAGCACTCTTCCGGAACTTGGGCCTACCTCGTGACCCAGAGATGGACTCCA
ATGCCTCCACAGGCCCTGGTTCGGTCTAGCGCTCAAGACCTCCGACACCTGCAGACATCC
CGCACGACGAGCCAGACCAGGACCCACATACACTCACCTCGCACACCATAA
>g148
ATGTGCTGCAAGGCACAGTACTGGCTTATTGTTGGTTCTGTCATTGGAGGGCTGCTGGCT
ATTTTAGGTGGAATTCTAATACCCTTGGGAGACAAAATCATTAGTGATGAAATAGACAAG
GAAGCAGTAATTGAGGAAGGAACAATTGCTTATGAAAACTGGGTTGTGCCTGGAAGCCCG
GTCTACAGGGAATTTTGGATATATGAAGTTTTAAATCCTGATAGAGTATTAAATGCAGAG
AAACCAATACTAAGGCAAAGAGGACCATACACATACCTGGTTCGACATTTACCAAAAGCT
AATGTGACACAGAACCACAATAGCACTGTATCATTCTGGCAGCCAAATGAAGCCATCTTT
CAGCCAAGCAAATCTATTGGATCAGAGCATGATCAGTATACAGTGCTGAACCTTGCTGTT
GCTGCTGCACCTGCTTTACTTCCACAATCTCCAGCGTTAGTGAATACATTAATTCGAGAA
TCTAATTCTTCATTGTTCCAAAAGAGAAGTGTTCGAGAGCTTCTGTGGGGTTACATAGAT
CCCTTTTTGCAAAAAATACCGGATGTACTGATAAAAGATAAGACAACTGGAGTGTTCTAC
CCATACAACAATACAGCAGATGGTCCCTATACTGTCTATAATGGAAAGGACAACATCAAG
AAAGTTGCAATAATAGATAGAACACTGTCTTACTGGATGAATGACTACTGTGACATGATT
AACGGTACAGATAAACCAATTTTTCTTACACTGCCCCATTATCTATATGCAAGTGACTTC
CTTTTGGAATCTGTGGATGGCCTGAAGCCTGTTGTAGAAGAACATAAAACATATGTAGAT
GTGGAACCAATAACTGGATTCACAATGCACTTTTCTAAAAGGTTACAAGTGAATGTATTT
TTTCAGAAACAAGAAAAAATACATGTACTGGCAAATCTTAGTTCCGATTTTGTGTTCCCT
GTCTTATGGCTAAATGAGAGCGCCACCATTTCTGATGAATCAGCAGATGAATTTATTAAC
AGCGTAACATTCCCAATGAAGCTGCTGGAGATAATTCAAATTGTGCTGCTTTGTATTGGC
TTTGCTACTTTTCTACCATGTTCAATAGTACTTATTGTAAAAAGCTGCAACAAATCAAAA
GTGCCAGGGGAGAGAGTATTCAAGTGCAAGAAACCTGGCTGTGTTGCCTACCACGAAGTG
GGCAGCAACTACCAGGCAACTCATGTAATTGTAGAAAGCATTAATAAGGCAAACGTTGTT
TCCCTTACCAATGCCTCTAAAACCGTTGTTGGCCCAATTTTTTAA
>g160
ATGGGTGTCGGGGCTGCCCGTGCTGGAAACCTCACGTTTATGGTGGGAGGCGTAGAACAA
GAGTTTGATGCCGCAAAAGAATTGTTATCGTGTATGGGAGCCAATGTGGTCTACTGTGGT
GAAGTTGGCACAGGCCAGGCTGCAAAGATTTGTAACAACATGCTGCTGGCTATTAGCATG
ATTGGAACTGCGGAAACAATGAATCTTGGAATCAGATTAGGGCTTGACCCAAAGCTGTTG
GCCAAAATCCTAAACATGAGCTCTGGCCGGTGTTGGTCAATCGATACCTATAATCCTGTT
CCGGGAGTGATGGAAGGAGTGCCGTCTGCAAATAACTACCAAGGAGGATTTGGGACCACA
CTCATGGCAAAGGATCTCGGGTTAGCGCAGGACTCTTCTACCAACACCAAAAGTCCAACC
CCACTGGGATCCCTCTCCCACCAGATATACAGATTAATGTGTGCCAAGGGCTATGCTCAG
AAAGACTTCTCATCTGTCTTTCAGTTTTTACGTGAAGATGAGAATTTGTGA
>g156
ATGGAAGGAAATAAAAATGCAAGCGAGAAAAAAGAGAAGCTGGCAGACCAGATCATGCAG
AATCCTCAGGTTCTAGCTGCCCTTCAGGAGAGGCTGGACAGCGTGTCTCAGACGCCATCG
AGTTACATCGAAACCTTACCAAAAGCCGTGAAGCGGAGAATTAACGCCTTGAAGCAGCTG
CAAGAAAAATGTGCGCACATAGAGGCAAAGTTTTACGAGGAAGTTCACGAGCTGGAAAGG
AAATACGCCGCTCTGTACGAGCCGCTGTTTGATAAGAGAAGAGTAGTTGTGACCGGTGAG
GAGGAACCAACAGATGCAGAATGTGAATGGCACAGCGACGGCGAGGAGGAAGAGAAGTTA
TCGGCAGAAGTAAAAAATAAGATGACCGTATCAGAGAAAGAGCCGTCGGATGACGACAAC
CCCAAGGGGGTCCCCGACTTCTGGCTCACCATCTTTAGAAATGTGGATATGATAAATATT
TCTTTACAGGAATATGATGAACCGATTCTAAAGCATCTACAGGATGTAAAAGTAAAGTTT
TCTGATGCGGGCCAACCAATGTCTTTCACTTTAGAGTTCCTTTTTGAGCCCAACGAGTAT
TTTACTAACTCCGTTCTAACAAAAACGTACAAGATGAAGTCCGAGCCCGATTCCGCAGAC
CCATTTTCATTTGAAGGACCGGAGATTGTGGATTGTGAAGGTTGCACCATCGACTGGAAG
AAAGGAAAAAATGTCACTGTCAAAACAATCAAGAAAAAGCAGAAACACAAGGGAAGAGGT
ACAGTCCGGACTATAACCAAACAAGTGCCCAATGAGTCCTTCTTTAACTTCTTCAGCCCC
ATTAAAGTGTCCGGGGAGGAACTGGACGAAGAAATGGAGAATTCTCTAGCCGCTGATTTT
GAACTCGGACACTTCTTCCGAGAGAGAATAGTTCCGCGCGCAGTCCTTTATTTCACTGGG
GAAGCTATTGAAGATGAAGAAAGTTTTGAAGAGGGCGAGGAAGGAGAGGAAGAGGTGTTC
ATTAAATATGCTCAATATTCCATGGATTTCAGTGACATTTTACTGCCAAATGAGTCACTT
TGTAAGATTGACGAGACTTTCCTCATTCCATTGACATCAGAGCCATATCTCCCCAGCGAT
AACATGACGGCAGGTTATTCATCAGCTGTAAGAGAGGAGCGTATGGAAGGCTTTCCTGTC
CCACGTCCTCCGATATCCCGTTACAACCCCATGGCTACATTGTATCACCAGATACCTGCG
GTGATAAGCATGGACCTCACATGGTTGGCACTCGCCAACATCGGTCTTTGGCCTGGCCTC
GGTGGGGCACTTCTTGGAGATCCAGAGAAATCACCTTGA
>g155
CCATTTTCACAAAAGCTGAAGGAGACGACGGATCTGGATAAAAAGCAAATGCTGGAGAAG
ATCGATAAGGCGGTCTCTGCCGCCATCCAGCCGCTCGAGGACGCCGTGAGCAAAAACGCG
TCCGAGGAGGAGATCGCTAAGTACGCGAAGATATTACTTGAAGAAGCCGCAGATCTGCTC
GCTGATTGGCTGGATGCCCAGCATAGCGCTGACGTTACCGATAACTCCATTTTCTCCCAG
CTTCCAAAGCACTGGGAAGGGGAATACCATAAAGATATGGAAGATCTGAACGTTCTCCCC
CCCGACGTCCTCACGCGAGTGAGCGAATACGTGCCCGAGATCGTCGAGTTCGTGCAAAGA
ATTGTGGATAACGGTTACGGGTACGTGTCCAACGGTTCAGTTTATTTTAACACCGCCAAG
TTCGACGCCAGCGACCGGCACTTCTACGCCAAACTCGTTCCCGAAGCCGTCGGAGATCAA
AAAGCCCTTCAGGAAGGAGAAGGCGACCTCAGCATATCGGCGGATCGGTTAATCGAGAAG
CAATCGCCGAATGATTTTGCGTTATGGAAAGCATCAAAGCCCGGGGAGCCGTCCTGGGAG
TCCCCGTGGGGGAAGGGCCGTCCCGGTTGGCACATAGAATGCTCGGCAATGGCTGGTTCT
ATCCTCGGCGAGTCCATGGATATTCACGGAGGGGGCTTCGATCTCCGGTTCCCCCATCAT
GACAATGAACTGGCGCAGTCCGAGGCTTACTACGATAACGACCACTGGGTGCGTTATTTT
CTCCACACCGGTCACCTGACCATAGCCGGCTGCAAGATGTCTAAATCCTTAAAGAACTTC
ATCACCATCAGAGATGCATTAAAGCGGAATACTGCGAGACAACTCCGCCTGGCGTTCCTC
ATGCACTCCTGGAAGGACACCCTGGATTATTCCTGCAACACGATGGAGTCCGCCGTCCAG
TATGAGAAATTCATGAACGAATTCTTTTTAAATGTGAAGGATATTCTCCGGGCGCCGACG
GATATCACAGGGCGGTTTGTGAAGTGGGAAGCCCCCGAGATAGAGCTTAGCAGAAGCTTT
TATGACAAGAAAGCCGCGGTTCACGAAGCCCTGTGCGATAACGTCGATACCCGGACCGTG
ATGGAGGAAATGCGCTCGCTCGTTGGCCAGTGCAACTCGTACATCGCCGGCAAGAAAACC
GCCAAACTTCCCCCGAACAGAATGCTTCTGGAGAGCATCAGCACGTACCTGACCGGCATG
CTGCGAATCTTCGGTGCTATTGAAGGAGAGGAGCCCATTGGATTCCCTGTAGGGGGCGCT
GCACAGAACCTCAATCTGGAGTCCACGGTAATGCCGTATCTCCAAGTTCTGTCTCACTTC
AGAGAAGGCGTCCGAAAAATTGCCAGAGAGAACAAAGTCTTTGAAGTATTGCAGCTCAGC
GACGCTCTTCGGGATGACGTTCTTCCAGATCTCGGGGTGCGTCTTGAAGATCACGAAGCG
AAGCTCGCGAAGATGAAGGTCTCTCCGAGCGAGATGTTCAAGTCCGAAACCGACAAATAC
TCCAAGTTTGATGAAACCGGTTTCCCGACACACGATGTTGAGGGCAAGGAGCTGAGCAAA
GGACAAGCCAAAAAACTCAGGAAACTCTTCGAAGCGCAAGAAAAATTACACAAAGAATAT
CTGCAGTCGCTTCAGAACGGAAGCGCAGACTGA
>g150
ATGGATGGATGCGGATTCCTTGTAACAATAGAATATGACTACTTGACTCACACCTCGAAT
CTTCTGCAGGCCACCACACCTTTCCTGCATGAAGATACACTGCGGAGCGACACAGGGGAT
GCATCTCCTTCAATCGTTGATTTCCAGGATGTCACAACGATTGCAGCTGGCAAGCCCTTT
CACTTCATATGCAAAGATTCCAGCATGGTGAGCTGGACCTACCATAGGCATGGAAGGAAA
CCAAAATCTTTGGTTACCCAGTCATTTAATGGAAGTAACACTGACCGTGTATATTATAAC
CGGAAAGCTGAGACCAGACACACCGGAAGATACGTGTGCACCAATACGGTGACCCAGGAG
AACGTCTCCTTCTATTTGTTTGTCAAAGACCCAACAAACCCATTTTCTGAAACCCCTAAT
TATTTTGATGCACCCGAAGGGAGCGATACTGGAGGGATTTGTCCTCTTGCTGATCCAGAT
GCTGTGGATTTTGGAATAAAAACATGTGATAATTCTCCACTACCAAAAGATTTCACCTAT
ACGACAGACACTGAGACTGGAATCACCATTAAAAATGTACAGATGTATTTCAAAGGCTGC
TACGTATGCACTGCCACGCAAGACGGCTTTGTGAGGACATCTCCCAAATTTAAACTGCAT
GTAAAACCAGCTCACAAAACCTTGCCCACGGTATATCTGACAAAATCCAGGCAACTCGTC
AAGAGCGGAGAACCCTTTGAGGTCACTTGTGTTGTGAAGGATGTTTTTAGTTCTGTGGAA
GCTAGTTGGCTTGACCAACGGAATATGAACGTCATTGAAAACAGTCGCTTTCTTTCTCTA
AACAACTTCGTGCGAAATTTAACTCTGAAGAGCGATGCCGTTCAGTTTAACGAGTCGGGA
ACATTTACCTGCCAAGCAAAGAACAGCATTGGTGAAGTGAACGTCACCTTCACTTTAGAA
GTTATCGACACGGGGTACATCAACCTGACCATCGCAGATAACACCACCATAGATGTCAAT
GCAGGAGACAACCTTGTCTTAAAAGTTTTCATCGACGCGTACCCCAGACCAGATGGAGAA
GTATGGACTTTCATGAATGAAACATTATTAAACACATCAGACCATTTTGTGCAGTCACAT
GAGGACGGCTTCAACAGGTACGTCAGTGAGCTCCATTTAATTCGCCTGAAGGGAACTGAG
AAAGGCGATTACACGTTTTACGTCTCCAATTCTGATGCCAACACTTCTGTCACCTTCAGT
ATTTTCGTAAAAACGAGGCCGGAAATCGTGTCAGCGGTGAGAATCAGTGATGGGCTCCTG
CAGTGTGTCGCGGCAGGATTCCCCATTCCCTCCATTGACTGGTATTTTTGTCCTGGAAGT
GAGCAAAGGTGCCAAGACTCTGCAGTGATTCCACCAGTGGATATTAAGATCAGCCAGGAA
AACTCATCACTTGGACGCATGGTGGTAGAAAGTACCATTGACGTGGGTTCTATTAAGAAG
AACGGCACAGTGCAGTGCATCGCTTACAATGAGGTTCATAGCAGCTCATCGGTTTTTAGC
CTGGCTATTCAAGAAAATATTAGCACCCACACCCTGTTCACTCCTCTGCTGATTGGCTTT
ATTGTGGCTGCGGTACTGATGTGTATTGCTGTTGTCGTCCTTATGTACAAATACATGCAG
AAACCAAAGTATGAGATACAGTGGAAAGTGGTAGAAGAAATCAATGGCAATAATTATGTT
TATATTGACCCAACACAACTTCCTTACGATAACAAGTGGGAGTTTCCCAGAGATAGACTC
TGCTTCGGTAAAATCTTAGGTGCTGGAGCGTTTGGAAAAGTGGTCGAAGCTACGGCTTAC
GGTCTTTCAAAGCCAGACACCACCATGACAGTGGCCGTTAAAATGCTGAAACCCAGTGCT
CACGCAACCGAGAGAGAAGCCCTTATGTCTGAACTGAAAGTTTTAAGTTATCTTGGACAC
CACAAAAATATTGTGAATCTCCTGGGCGCCTGCACTGTGGGAGGACCAACCCTCGTCATC
ACTGAATATTGCTGTTATGGAGATCTTTTGAATTTTTTGAGAAGAAAGCGGGATTCGTTT
ATTTGTCCAAAATTTGAAGAACATTCAGACGCAGCGCTTTATAAGAACCTTCTTAATTCA
AGAGATCACATTTGTGAAGGAATGAGTGAATACATGGACATGAAGCCAGGAGTATCTTAC
GTTGTCCCGCCGAAAAAAGACAAAAGGAGATCAGGTTCGTATGTTGATCAGGATGTCAGC
ATTGCTATGCCCGAAGAGGATGATTTAGCCTTGGATACAGAGGATCTCATCAGCTTTTCG
TATCAAGTTGCTCAGGGCATGAACTTCCTTGCTTCTAAAAATTGCATTCACCGAGACCTA
GCAGCGAGAAACATCCTCCTCACTCACGGCAGAATTACCAAAATCTGTGACTTTGGCCTC
GCAAGAGACATTAAGAACGACTCGAATTATGTGGTCAAGGGAAATGCCCGGCTCCCTGTG
AAGTGGATGGCTCCTGAAAGCATCTTCCACTGTGTGTACACATTCGAAAGTGATGTCTGG
TCGTACGGAATACTCCTCTGGGAAATATTTTCTCTAGGGAGCAGCCCATATCCCAGAATT
CCGGTGGATTCCAAGTTCTATAAAATGATAAAAGATGGATATCGGATGCTAAGTCCAGAA
TGTGCTCCAGCTGAATTGTACGAAATAATGAAAAGTTGCTGGAATGCAGACCCATTGAAG
AGACCAACATTTAAACAAATTGTACAGATGGTGGAACAGCAGCTGTCAGATGGCAAAGGA
CGTTCACTCTCAAATACTTCTCCTGTGATTACGAATCAAGTACCCTTGGATCACTCAGTG
CGTATAAATTCAATTGGGAGCAGCACATCTTCAACACAACCATTACTGGTACCTGGAGAC
CACTGA
>g152
ATGGTGGTGGCGCTGCACACTCCCTTCAGCCTGAAATGTACCGGAGAAAGCGAGCTGAGC
TGGCACTACCCGGAACTTGACGACGACATCGACAACATAGAAATCCGCAGTGAAGAAAAC
AACAGTGGCCTGTTTATGTCTGTACTGGAAGTCCACAATGCCTCTGTCTATCACACAGGG
CTGTATACCTGCTACCATAACCACACTCAGACGGAGGAGAACGACATTGAAGGCACAGAT
ATATACGTCTATGTTCCAGATCCTGCAGTGGCTTTTGTCCCCTCCATGATGCTCGAGCAC
ATCATTGTGGTAGAAGAAGAGGAAACGTCCACAATCCCATGCCGTACCACCAACCCCGCA
AGCCAGGTGACATTAAAGCACGTGGAAGCCGCCAAGACAGTCAATGCCTTTTACGACAGC
AAGCAAGGATTTTTTAGTAACTTTGCATCAGGCTCCTACGTCTGTGAAACCGTGGTCAAC
GGCGTGGTCTTTAAAACAGACCCCTTCATTGTGCAAACGTGGAAAGCAACACAAGACATA
AGTGTAGAGATGGAAGCTCCAAAAACGGTGTTTAAATCTGGTGAAACAATCACTGTTTCC
TGCATTGTGCTTGAAAACGAGGTGGTTGACTTACAATGGACATACCCCGGCCAACAGAGA
GGAGCTGGAAGTGTGAAGGTTAAAGAAAACAAGGTGCCACGCTTGAGACTGGAATACACA
CTGACCATACCCAACGTTACGGTAAAGGATTCTGGGGAATATGCGTGCGCGGTTCTTCAC
GCAACTCTGGATACCGAAGAAGTAAAGAATGTCATCATAACGGTGCATGAAAAAGGATTT
GTCAAACTAGAGCCTAAAGTTAACTCGCTGGAATTTGCCAATCTTCATGAAGTGAAAGCC
TTTTCTGTTGGCTTGCACGCATACCCAGCGCCAAAAATCTACTGGTTAAAAGACAACATG
ACTCTCAGTGACAATCTGACGGAGATCACCACTAGCACTGTCAGAATCCAGGAAGCCAGG
TACCAAAGTCATTTGAAACTCATACGTGCCAAGGAGGAGGACAGCGGAATATATACTCTT
GTAGCCCAAAATGAAGCTGAAACAAAACATTTCTCTTTTGAGTTGCAAATTAATGTGCCC
GCTTTGATATCACAGTTGGTTGATGACCACAATGGTTCTTCCGGTCAGCAAACAGTCAGC
TGTCGGGCTAAAGGCATTCCTGTTCCAGATATGGAATGGTTAGTTTGCAAGGACATAAAA
AGATGTAATAATGACACGTCATGGTCCATCCTGGCAATCAATGGCTCGGAAATCACCATG
GAGACTCATCAGATTGAGGAGAATTTGATGGAAAGCAAGGTGACGTTTAAGAAAGTGGAA
GAGATACTGGCAATCCGATGTGTTGCAAAGAATTTCCTTAAAGTTGACACAAGAGAACTG
AAGCTGGTAGCACCCACCCTTCGATCTGAGCTAACAGTGGCAGCTGCTGTGCTGGTTTTG
CTTGTCATCGTCATCATATCCCTCATAGTTCTTGTCATCATATGGAAACAGAAACCAAGA
TACGAAATAAGATGGCGAGTCATTGAGTCCATTAGCCCCGATGGCCACGAGTATATCTAT
GTAGATCCAATGCAACTGCCTTACGATTCCCGATGGGAGTTTCAAAGAGATGGACTTGTT
CTTGGACGAATCCTCGGATCTGGTGCCTTTGGAAAAGTAGTGGAGGGCACTGCTTATGGA
TTAAGTCGTTCCCAGCCTGTGATGAAAGTAGCTGTAAAAATGCTTAAACCCACCGCTAGA
TCGAGTGAAAAGCAAGCACTGATGTCAGAACTGAAGATAATGACCCATCTTGGAGCTCAC
CTCAACATAGTGAACTTACTGGGAGCATGTACCAAATCAGGACCAATTTACATTATTACG
GAATATTGCTTCTATGGAGACCTTGTGAATTATCTTCATAAGAACAGAGACAACTTTCAG
ACTCGGCACCCAGAGAAGCCAAAGAAGGATCTGGATATCTTTGGGTTGAACCCAGCTGAT
GAGAGCACAAGAAGCTATGTCATTTTATCCTTTGAGAACAATGGTGACTATATGGACATG
AAACAAGCTGATAACACGCAGTACGTCCCAATGCTTGAAATGAAGGAAGCCTCAAAGTAT
TCTGACATCCAGAGATCTTTGTACGATCGCCCTGCATCTTACAAGAAGAAGCCCATGTCC
GAAGTGAAAAACATTTTGTCAGATGATGGATTTGAAGGTCTAACGCTCCTGGATTTGCTG
AGTTTTACTTACCAGGTCTCCCGAGGAATGGAATTCTTAGCAAATAAGAACTGTGTGCAC
CGCGACCTGGCAGCTCGAAACGTCTTACTGGCGCATGGAAAAATCGTGAAGATCTGTGAC
TTTGGCCTGGCGAGAGACATCATGCATGACTCCAACTATGTTTCAAAAGGCAGCACATTC
CTTCCAGTGAAGTGGATGGCACCAGAAAGCATCTTCGATAATCTGTACACAACTTTGAGT
GATGTCTGGTCATTTGGCATCTTGCTTTGGGAGATATTTTCTCTAGGAGGCACCCCATAC
CCAGGCATGATTGTGGATTCCACCTTCTACAACAAGATAAAAAGTGGTTACAGAATGGCA
AAGCCTGACCATGCCACCCATGAAGTGTATGACATCATGGTAAAATGCTGGAACAGTGAA
CCAGAAAAAAGACCTTCATTTGGCCACTTGAGTGAAATAGTGGAAAGCCTTCTTCCCGCA
GAATATAAAAAGTGCTACGAAACGATTCTTCACGATTTCCTTAAAAGCGACCATCCAGCC
GTAACCCGTATGAGATGCGACAGTGACAATTCGTACATTGGGGTGACTTACAAAAATGAA
AGCAAAATGAAGGACAGGGAAAGCGGGTTTGATGAACAGAGGCTCAGTGCTGACAGCGGC
TACATCATTCCCCTGCCTGACATCGACCCTGTGTCTGAAGATGAATCAGGGAAAAGAAAC
AGACACAGTTCACAAACCTCCGATGAGAGTGCAATTGAGACTGGTTCCAGCAGTTCCACA
TTTATTAAACGCGAGGATGAGACCATTGAAGACATCGAAATGATGGATGAAATTGGGATC
GATACATCAGATTTGGTGGAAGACAGTTTCCTGTGA
>g167
ATGACACGGACAGCTGTTATGTCCAAAGCAATTCAGGTATCTGGTGACGAAGAAGGTACT
TCTCTATCAAACATAAGAGCTTTAGAAAAAGAGAACCTCTTCCTTAAAGCATTAATCGAG
AAGAAGGATACAGCATTAGACAATCTGAAGAGAGCACTTCATGATAAGGAGACGCAATAT
ACCAAAGATATAGAAGAAGAAGTAAACAGCCATGAAAGAACAAGAAATAAGCTGGAGGAA
GTCCAGAATCTGGTGGAAGAAAGGGATCGGCTCTTAAATGAAAGTATTATGCGTTATGAG
AAAATGACTCAAGAGTTAAAGGATCAGTATGAAGAGGCAGTGGCCTCATTAAATGAACAG
ACCCAACTTCAGATATCAATCAGGGATGACAAGATTACCAAACTCAAGCACCAAATCTCT
GAACTCTTTAAAGAGAAATCATGGGAACATCAGCAGCAAATGGAGGAGCGCCAAAGGGAA
TTAGATCGATTAACAGAACAAAATCAGTTACTTCAAACTCAGCTTAGAAAAGAGACTGCT
TCCAAAAAGGAGTGTCAGCAATGCAAATCATTGATATCAGCCCTCGAGGATAAGAATGTG
CAGCTTAAACTAAAGACTAGGACTATTGATGAGCTACAGTCCATGTGCCAAAGGTTTCAA
AAGCAACTCCAGGAACAAGTGACCGTTCAGTCCAGTAAAAAATATTTAGTGTAG
>g163
AGTGGCGTGCTAGATGTCCAGCCCCAGAAACATTATGGCATCACCTCAGCGATTAGTTGG
GCTGGCCCCAAAGATATTGATCATATTTACACCCAGAAGCTCATAGAGGCCATGAGACCC
TTTGGTGTGTTTGAAGATGATGAGGAACTCAGTCATAGGTTAGTTGTGTTGGGTAAACTG
AACAATATGGTGAAAGAATGGATTGCAGAACTTGGAGAATGCAAGGCTGTGGAAGATGCC
TTTGTTCCAGTTATTAAATTTGAATTCCTTAATATTGAGTGCATCCCAGACAATTTGGAT
TTACGTGATGATTCGGGTTTGAAAAACTTGGATATAAGATGTATAAGGAGCTTAAATGGA
TGCCGAGTCACAGATGAAATTCTCCATTTAGTACCCAACAAAGAGAATTTCAGGTTAACC
CTCAGAGCTATAAAACTGTGGGCAAAAAGGCGTGGGATTTACTCAAATGTGTTGGGATTT
CTTGGAGGGGTCTCTTGGGCCATGCTGGTTGCCAGGACATGTCAGTTGTACCCAAATGCT
GTGCCATCTACACTTGTGCACAAGTTCTTCTTGGTATTTTCAAAATGGGAATGGCCTAAT
CCTGTGTTGCTAAAACAGCCAGAAGAGAGTAATCTGAATTTACCAGTGTGGGATCCAAGG
GTGAACCCAGCTGACCGCTATCACTTAATGCCGATAATAACGCCTGCATATCCTCAACAA
AACTCTACGTACAATGCTTCTACATCAACACGTGCAATTATGGTAGAGGAGTTCAAGCAA
GGTCTGACAGTCACTGATGAAATTCTTCTTGGAAAGGCGGATTGGTCAAAACTTTTTGAA
CCTCCAAACTTTTTTCAGAAATACAAGCATTATATTGTTTTAACTGCAAGCGCATGTACA
GAAGAGCATCACCTCGAATGGGTTGGCTTGGTTGAATCTAAAATTCGAGTGCTTGTTGGG
AACTTGGAAAGAAATGAGTTCATTACACTTGCCCATATAAACCCTCAGTCTTTCCCTGGG
AATAAAGAGCTTTGCAAAGATAATGAATATATGTCAATGTGGTTCCTTGGAATTCATTTT
AAGAAGGTGGAGAATGCTGAAAGTGTTAATATTGATTTAACCCATGATATACAGTCATTC
ACTGACACAGTATACAGACAAGCAAATAACATTAACATGCTAAAGAAGGGAATGAAGATT
GAAGCAACCCATGTTAGGAAGAAGCAACTCCATTACTACCTTCCTGTCGAAATGCTGCAC
AAAAGGAAAAAGCAAAGTGTGCCAGATATTAGCAGATCAGCTTCTGGATTATCCTCCAAA
AGATCATCTTTAGATGGAAATTACTTGGACAGCTCTAGAGATACAGACACAGGCACACCT
TGTCAATCTCCTACTTCATGTCATCAGAATTCCAAATCTGAAAGTCCTACTCTACCTCAG
CCACAAAGCCAAGCCATACCAGAGGAAATTTCGTCATCTTTGTTTCCGTGCTCCCACAGC
GTGGATGCGCCTTCAGAGGTTGCCCAAGGATTCTCAATTCCGGTTATAGTGTCAAAGTCC
AAGTCTGCTGTTGCCATGAAAGAGGGCATCCATTCATCTGGCTGTAGCATTCCAACAGTA
GTAGGACTGAATGTTGTTCCACGTCATCAATCACCCCCAAAGCATTCTCAGGAGCAACAT
CCCCAGAACGGACTAGTGAACTTGAGCCCGAAAAGTGCTGCCGCCAAAAGGACTCACCCA
CCTTGTTTGGAAGGTTCTTCAAAAAGAATTAAGGATGCTGAAACGGATATGGGATTAGCA
GATTCTGCGTTGATAGAGCCATGTCCCAAAGAGGAGGAAACAATCAGGCAAGCTGTGGAA
AGGATTATTGTTGAGCCTATGCCTATCCCCACTATTGAGAGATGTAGATCACAGCGACTA
CCCAGTAAAGAACTTCCAGATGCTTCTTCACCAGTGCCAACCAGTAACATCAGAGTCATA
AAAAACTCTATTAGGCTAACTCTAAACCGAAAACTTAATTCTGAGCTGCCTCCTGTGGAG
GCCTGCAAGAAAAATTAG
>g166
ATGGCGGCTCAGCCTCCTCCTAAGCCGTGGGAGACCCGGCGCGTTATGGGTGGTCTCCCC
GCCACCTCATATCATTCAGCTGATCTTAGAGCTAATGTCTTGACTAGACCAGGACAGCCA
GCTCTCAGCAGAGTGCCTCCTCCGGTTTTACCCAGACCGACACAGCAGACCAGAAGCAGT
ACAATCAGTCCCTACCGGCCCGCATACAGCTCTTTCTCACCAGCCTTTGGAGGATCGTAC
AGCAGCTCGTTTTATGGCAGCTACAGTCCGTATAGCTACGGGGGTGGCATGGGATTTAAT
CGCTTTCAGGGAGACGATGTGCCCCCTAGTAGGTTTGTCCGTCAAGCTGAAGAGAGCAGC
AGAGGGGCTTTCCAGTCTATCGAAAGCATTGTCCACGCGTTTTCCTCCGTCAGTATGATG
ATGGATGCCACGTTCTCTGCGGTTTATAATAGTTTTCGAGCTGTTCTGGATGTAGCCAAC
CACTTTTCCAGAATGAAGGTACATTTCACAAATGTGTTTTCAGCTTTTGCACTAGTGAGA
ACAATCAGGTTCCTGTACAGGCGCCTGCAGAGGTTATTGGGTCTGCGGAAGAATTCCGAA
ACAGAAGACTTGTGGACTGAGAGTGCTGGGACTGTAGCCCTAAACAACCCCGAAAGAAAT
GCTAACAAGTCCTGGCCTATTTTCTTGTTCTTTGCTGTAATTCTCGGCGGCCCGTACCTT
ATTTGGAAACTTCTGTCTACGAGTAATGAAGAAGACGCTAATGAAAACATAAACTGGGCA
AGTGGAGAAGATGATCATGTTGTGGGAAGAGCGGAATATGACTTTACTGCAGCTTCTGAC
GAAGAAATCTCGTTCCGTGCCGGAGATCTGCTGAATTTGGCTCCTAAAGAACAACAGCCC
AAAATCAGAGGTTGGTTGCTGGGAAGTGTCGATGGACAGACAACAGGATTTGTACCAGCA
AATTACATAAAAATCCTGGGTAAAAGAAAAGGAAGAAAGTCTACAGAATTAGAAAAGCGT
GAAGAGTCGCAGGCTTTCCCAAGCAGCCCATCGGTACCCATGGCAGTCGCCACTTTAGAA
GAGCAAGAGGCAGCCCTGGAATCGGTCTTTGTGGAAACAAATAAGTCTTCATGTGACATT
AACACAAGTGGATCACATGGGGAAGTATTTGATTTATAA
>g164
ATGGGTGGACATGAGCCTTACATAGAAATATTTGAACAGCCTCGGCAGAGAGGAATGAGA
TTTAGATATAAATGTGAAGGGCGATTAGCTGGCAGCATCCTCGGTGAGCACAGTACCGAT
AATAACAGGATATACCCATCCATCCAGATTATGAATTATGTTGGCAAAGGGAAAGTGAGA
GTCACTTTGGTTACCAAAAACGAGCCATACAGACCACATCCTCACGATCTAGTTGGCAAA
GACAGCAGGGATGGATATTACGAAGCTGAATTTGGTCCTGACCGTAAGGTTCTAAGTTTT
CAAAATCTGGGCATTCAGTGTATTAGAAGAAAAGAAGTTCGAGAGGCGATCCATAACAGG
ATTATGAGCAAAATCAATCCATTTGGTGTGCGAGAAGAACAACTTCTTACCATTGAGGAT
TATGACCTGAATGTTGTACGGCTGTGTTTCCAAGTATTCCTCCCTGACGAACATGGAAAC
TATACAAGAGCTCTGGCACCTGTTGTTTCAAACCCAATTTATGATAATCGTGCACCAAAT
ACAGCTGAGCTAAGGATCTGCCGTGTAAACAAGAATTGTGGAAGCGTAAGAGGAGATGAT
GAAATATTCCTTCTCTGTGACAAGGTTCAAAAAGATGACATAGAAGTCCGCTTTTTCTCA
GACAACTGGGAAGCTAAAGGAACATTTGGACAGGCTGATGTGCACCGTCAAGTTGCGATT
GTGTTCAAAACGCCTGCATTTCCTTTCAACATCACGGAACCAACTACTGTGAAAATGCAG
CTTCGGAGGCCTTCCGACCGAGAAGTCAGTGAACCAATGGATTTTCGATACCTGCCTGAT
GAGAAAGACCCATATGGCAATAAAATTAAAAGACAAAGAACATCCTTAGTGCTACAGCAG
TTCAAAAAGAAGTATGAAATGGAGGAAAACATCAGAGTTGTGCCACAGCAGAAGTTTGTA
GATGACAAACAAAGTATAAAACCAGAGCCATTCGTTAATCAGTCGGAGTGTATGAACCCT
TCTCAAGTTACGCAGCCTCCCCCAAAAGCATTGTTTTCATCAAACGCCCTCAGCAGCTCT
GTAATGCTAGATTTCCAGAGGTTTGCTGTTCAACCAAGCACACAACATCTTTCCAATTCA
CTCAGGAACTTGTCGAACATGGGGGACAACTCTTATAATGTGGCACCTAACACTGTCCCT
TGTTCCTTCACACAAAATGAGTTTCAACCACTTCATAACCATGGGCACTTATGCGGAAGT
GTTCCATATCAGTCGACATGTAGACCTCATAATGATTCCAGTAGTGCATCCAATTTGCAA
GGAAGTGGTTTTAACATGTATGAGAACAGCCTGAGGAACCCATTGACTGGAACCAATGGA
ACAGCAGCCGGTTGTACAAATGTACCAAGAGAAGTAAGTTACATGGGCGTTCCTATGCAA
AATATGACTTATCAGTCAAACTTAAAAGAAGGGACGTCTCTCCTGGATTCATTAAGTGGT
TTGAGCACATCCACGTCCTCGAGCGTTCTACCCAACACATTTCAGTCCAGTGGGTTTGTG
CAATCAACAGTAAATTTTCAGACTTTGCAAAGCGACAGTGACATGCAAAATCAAGAAACA
CAACAAAACGAGGACTCGTTTATAAGTATGGAGTCTCAACTAGAAAGTATATTGAAGACG
TTAGCAGAATCAGAGCAAAGATTTAATGTCTAG
>g175
ATGGTGCTGAAAGGAAGAGGGAAAGGATCACCTGCAGTGATTTTTGGCAATAAGGCACTT
ACAATGGATGTGTTGTCAGGGCATATACTGGTTAATAAGGATGGAGACAGGCTGGACCCA
GAAGATGTTTTGCAGAATAAGATTGTTGGCTTGTATTTTTCTGCTGGGTGGTGTTCTCCC
TGCAAAGATTTCACCCCAATACTCTGTGACTTTTACAGTGAATTGATGGATCACCCCCAC
TCACCCCCACCATTTGAAATTGTATTCATCTCTTCAGATAAAAGTGCGGATGACATGGTG
GATTATATGAACACAATGCACGGGGACTGGTTGGCTTTACCCTGGCATGATTCATACAAG
CAGCACGTTGACCACTCCAAAGTCAATCAGGCATGGAAGGATACCACTGACCTAGAAGAA
GATGATGGATCCAAATGA
>g171
ATGAGGGGGATCGGTGATTTAGGTAATGAGGTGAAGCAGGAGCAAACCGTGGATGTGGAC
GTCTGGGAGATTCTTCGCAAAGCACCCCCTTCTGAATACGAGAAAATTGCCTTCCAGTAC
GGGATCACTGACCTCCGAGGACTTCTGAAACGGCTCAAGAAGATGAAGAAGGAGGAGAAG
AAGAGCACAGCCTTCCTGAAGAAGCTGGACCCTGCGTACCAAGTGGACAAAGGTCAGAAG
ATGAAGATGGTGGTGGAAGTGGCCAACCCAGATGCCGAAGTCAAGTGGCTGAAGAACGGG
CAGGAGATCCGTGTCAGTGGCAGGTACATCTTTGAGAGCATTGGGAACAAGCGGATACTG
ACCATCAACCATTGCTCCCTGGCAGACGACGCTGCCTATCAGTGTGTCATCGGAGATGAG
AAATGCTTCACCGAGCTTTTCGTAAAAGAGCCTCCCATTCAGATCCTCAAGTCCTTGGAG
GACCAGGTGGTGATGGTGGGAGAGAGAGTGGAGTTTATGTGCGAGGTCTCAGAAGAAGGA
GCGCAGGTTAAATGGGAAAAAGATGGGGTAGAACTGACCAGGGAGGAGACCTTCAAGTAT
CGTTTCAAAAAAGACGGCAAAAAGCATTACTTGATTATCAACGAGTCAACCATAGAAGAC
AGCGGCCACTACATCGTCAAGACCAATGGCGGAGAGTCAGTGGCGGAGCTCATGGTGCAG
GAGAAGAAGCTGGAGATCCTGCAGGATGTGGCTGATCTGACGGTGAAAGCCAAGGAACAA
GCTGTCTTCAAGTGCGAGGTGTCCGACGAGACGGTCACGGGAATCTGGGTGAAAAACGGG
AAGGAAGTGATTCCTAATGACAGGATCAAGGTTTCACACATCGGAAGGACCCACAAACTG
ACCATTGACAACGTGGTGCCTTCAGATGAGGGGGATTATTCCTTCATTCCCAATGGATTT
GCTTTCAACCTCTCTGCAAAACTACACTTTATGGAGGTGAAGATTGACTTTGTTCCACGA
CAAGAACCACCGAAGATTAAATTGGACTGCCTCTCCCAGAATGTCGACACCATCATTGTT
GTTGCCGGCAATAAGTTGCGTCTCGATGTCCCCATCACTGGAGATCCGGCACCCACCGTG
GTCTGGAGCAAAGGGGATAAGGTATTTCAGCAGCCTCTGATCAGGCCTGCTTCTGACCCC
GAGGATGTGTCAGATGAAGTCGATATACTTTCGGAGACCGATGGCAGAGTCCGCGTGGAG
ACGCATGCAGACCATTGCGTGTTCATCATTGAAGGGGCAGAGAAGCAGGACGAGGGGGTA
TATAACGTTGTGGTCAAGAATCCAGCTGGAGAGGACAAAGCCAACATCACTGTAAAGGTT
ATCGAGGCCCCAGATCCACCAGAGGCTCCCCGCATATCGAATATTGGAGAGGATTACTGC
ACTGTCCAGTGGGACCCACCAAAGTATGATGGAGGGCAACCAATTCTGGGTTACATCTTG
GAGAGAAAGAAAAAGAAGAGTTACCGCTGGATGCGGCTGAACTACGATTTGGTGAAGGAG
CTGAGCTACGAGTCCCGGCGGATGATTGAGGGGGTCATTTACGAAGTACGCATCTTCGCC
GTGAACTCCATCGGAATGTCGCTTCCCAGCCAGCCCTCACAGCCATTCATGCCTATCGGC
GGTCCGTCCCATCAACGTGAGAAACCGATACAAAACGAACAACTTTTATAG
>g191
ATGGCTCTCTCAGCTGATGACAAGAAGCACATTAAGAGCTTTTGGCAACCAGCCGCAGCT
CATGGTGAAAAGTTGGGTCCAGAAGCTTTGTACAGGATGTTCGTCTCAAGCCCTCAGACC
AAGACTTACTTCCCCAAATTTGACTGCCACAAGGACTCTCCTCAGATCAGAGCTCATGGT
AAGAAGGTATTTGATGCCCTGACTGAGGCTGCAAACCACCTGGACAACATCCCAGGATGC
CTGAGCAAGCTCAGTGATCTCCATGCTTATGATCTGAGAGTGGATCCTGGCAATTTTGCT
CTGCTGGCTCATCATCTCCTGGTTGTGTTTGCCATCCACTTTCCTGAGAAGTTTGATACT
CTTACACACCAGGCTCTGGATAAGTTCCTGGTTGCAGTTTCTGGAGTTCTGACATCTAAA
TACCGTTAA
>g184
ATGGGAGCTGGAGCTAGTGCAGAAGAAAAGCATTCTCGAGAGTTGGAGAAGAAGCTGAAG
GAAGATGCTGAGAAAGATGCCAGAACAGTCAAACTGCTCCTCCTGGGAGCTGGTGAGTCT
GGGAAAAGCACCATTGTAAAACAGATGAAAATTATACATCAGGATGGTTACTCCCTTGAG
GAATGCATGGAGTTTATCACCATTATTAATGGGAACACTCTCCAGTCCATGCTTGCTATT
GTGAGAGCCATGAACACACTGAATATCCAATATGGAGATCCTGCTCGACAGGATGATGCC
CGTAAACTCATGCACCTGGCAGACACCATTGATGAAGGTTCCATGCCTAAGGAGATGGCT
GATATCATTGGGCGCCTATGGAAGGACTCAGGCATCCAAGCTTGCTTTGATCGTGCTTCT
GAATATCAGCTCAACGATTCAGCTGGATATTACCTGAATGATCTAGATAGGCTGGTGGCC
CCTGGCTATGTCCCGACTGAGCAGGATGTACTGAGGTCCAGAGTCAAGACCACCGGTATC
ATTGAGACCAATTTTGGCCTCAAAGATCTCAACTTTAGAATGTTTGATGTGGGTGGACAG
CGCTCTGAACGTAAGAAGTGGATTCATTGCTTTGAAGGGGTGACCTGTATCATCTTCATC
GCTGCACTGAGTGCATATGACATGGTCCTTGTGGAGGACGATGAAGTGAACCGCATGCAT
GAAAGTCTGCATCTCTTCAACAGTATCTGTAACCATCGTTACTTCGCAACAACCTCCATT
GTACTCTTCCTTAACAAGAAAGATGTCTTCACAGAGAAGATCAAGAAAGCCCATCTGAGT
ATTTGCTTCCCAGATTATGATGGGCCAAACACATATGAGGATGCTGGGAATTATATCAAG
ACACAGTTCCTGGAATTGAATATGCGACGAGATGTGAAGGAGATTTACAGTCACATGACC
TGTGCCACAGACACAGAGAACGTCAAGTTTGTGTTTGATGCGGTCACAGACATTATCATC
AAAGAAAACCTGAAGGACTGCGGCCTGTTCTAA
>g187
ATGTTAGCAAAGGCCACCAGAAAGTCCAGCATTCTAGTAGAAGATGCTGCTCAATTTTCT
GACCTCATAGACAGGAAAGCTGCGGGCACTGCAATTGTGTTCAACTGTTGGGCATGCCTT
CAGCAGGGAACAATTCAACCATGGATGTCTTTAGAGACAAGCCGGCACATCAGGTATTTA
AAATTTGTGGCTGGCTGGGGAGTATTATTGACTTTTGCACAATACAAGACTGTACAAGTA
CTGGTTTTGTTAGAGCTTTCAGAGGAGCGCAAAATAGTCAAGTGCTGGAAGTCTTGGTGG
CCTCGATGTTTCCCTGGTGGAGGTCATCTATTAGAAGTCTACATTAAGGGCTTGTTGATT
CTCCAAACCGATGACTCAAATCAGCATCAGATTAGCACTCTATTAGCTCCAAGGCTGTTC
AGATCTGCAGAGAAAGGACCAAGGACAATTTCGCTTCAAGACATCACTATGAGGAAAGCC
TTTCGAAGCTCGACAACCCAGGATCAGCAGCTGTTTGACCGCAGATCTTTACCAATTCCT
CTCCGAGAAACATATAACCTATGTGAACATCCTCCACCTCTCAATATTCTGACTCCCTAC
AGAGATGATGGCAAAGAAGGCCTGAAATTTTACACTAATCCATCCTATTTCTTTGACTTA
TGGAAAGAAAAGATGCTGCAGGATACAGAGGACAAGCGGAAAGAGAAGCGAAAGCAGAAA
CAAAAGAATCTAGATCGACCACATGAGCCAGAAAAGGTGCCTCGAGCGCCACATGATAGA
CGCCGTGAATGGCAGAAGTTAGCTCAGGGTCTAGAGCTGGCGGACGATGATATTGAGATT
CTTCATAAACCAATGGAAATATCTAATGGCCCTGCTTCACACTATGAAACAAGGCCACAA
GCATATGGAGAAACTGTCGATGGACCCTTCTCACTTGCAGCACTACCCTACAGTCAGATG
AACGATCTCCTAAACAGGGTCGAAGATCGGGTGTTGGTGAGACCACATGAACCTCCTCCA
CCTCCACCAATGCATGCAGCAGGAGATGGAAAAGCCATGCCGCCAATGATTAGTGCCACA
TCAGGGCTGAATGACAACAGGCCACAGTCTCCTGCCACTGGTAGAACACAGATGTTTACT
GCTGTTATGCCACCACCTCCAACTCCCCTTCAGATAGCACCTGGTGTCCTCCACCCTGCT
CCACCACCTGTAGCACCTCCTCTTGCACAGCCTTCACCTCCGATATCACGTGCTGCTCAA
GTGAATGAAAATGTGCCAGGCCACCCACTTCCTCAGATGGAGGCACAGGGGCTTCCCCCA
CCACCACCTCCTCCTCCTTTACCCCCACCAGGAAAGCGACCTTCTTCCCCTGTTGCTGTC
CCACCTCTTTCTCATCCTCCTACCGGTCTGCATCCTCTTGCTTCTGTTGTGCCCGGTTCA
CATGCACCTTTACTGCCCCCATCCCCACCATCTCAGGTGGTTGCTGAGACTAAGAGACAT
CCATCAACTCTTCCGGTCATCAGTGATGCTAGAAGCGTACTTCTGGAAGCAATACGAAAA
GGTATTCAGCTCCGTAAAGTTGAAGAACAACGGGAGCAGGAAGCGAAACACGAACGCATC
GAAAATGACGTGGCTACCATTCTGTCCAGGCGCATTGCTGTGGAATACAGCGACTCTGAA
GATGATTCCGAGTTTGATGAGGTGGAATGGCTGGAGTAG
>g194
ATGGAGTCTCTCTCCGACGTGGAGGTCGATAGTATGCTTTCCCTTCAGAGACTCAGATAC
TTTACACCAGCGGCTGTGCGAGGGTTAATCCGATACAACAAAGTTAACCTGACAAATACA
TCGGGGATGTCTTCAGGTTATACTCAAGCCAACGTGGTGATAATACACAAATCCCTCGCA
GACGACTTTGAGAAATTCTGCCAGGCCAATCATGGCCCTCTCCCCTTATTATACCGGAGT
GCTCCAGGGGAGTGGAAGTGCCCTCCGCTGAGCAAGGACTCCGATATACGCACAGACTGC
CTGCAATATAGGAGGTACCTACACGGAGTCTTCTCCGGCAGCCTGAACACCCTGGAGAGT
TATTCTGAGCAGCTGAAGGACATGGTGACCTTCTACCTGGGCTGCAGCTTCTCCTTCGAA
AGCGCAGTAGAGAGATTTGGAGTCCCGGTGAGAAACGTAGAGCAGCAACGCAACGTCAGC
ATGTATTCGACAAACATCCGCTGCTCACCCGTTGGCGAGTTCTCTTGCAATCTTGTTGTC
ACCATGAGACCGATTCCACCGGACAAACTGGATGCCGCAGTAAAGGCAACACAACCGCTG
ACACATTGCCACGGAGCCCCTGTTCACATCGGCTGCCCAGGTCTGAATTAA
>g195
GAGGACAGTCTCAGTGATAGTGACCAGGACACTTTAACAGTGGATCAGACATGGAGAGGC
GATCTTGACAGTGAAGCTGACAGCCTAGACAGTGACCAGGAGGACCCTTTGAAGCATGCT
GGGGTGTACACAGCGGAAGAGGTGACTCTAATAATGCGAGAGAAGCTGATTCGTCTGCAG
TCTCTCTATATTGATCAGTTCAAGCGATTGCAACATTTACTGAAAGAAAAGAGAAGGAAT
TATTTACACAGCCTGAAGACAGAACAGGAAACAATTGGGAACAATCTTCTCACGGGCCCA
GAAGGCCTTTCCCCCAAGGAGCGCGATAGCCTTAAGCGGCTGAAAGCATTGCGACGATAC
AGAAGGCGCTTTGGTGTAGAAGCACTACTTCATCGACAGCTGAAAGAACGCCGCATACTC
GCCACTGAAGATATCTGCCAAGACAGCAATCAGGTCTTGTTTAAGCTGTGTGCAGGCTCA
GAAGAGGCTCCTTGTAACAAACCTCAGCCTGTCAGCCTTTCTGAGGATCCCCGCTGTCCT
CTACATTACCCGTTACCATCGCCTATGTACAAGTCGGAACCAGCATTAACAGTCCCAGTG
CCGATGGATGTCGCTCCAATAGAACTTTATTTGAGCACTGCTGAGTTGCAGCCCACTGAA
AACTTGCCACTTGAATTCAGTGATGACCTTGATGTTGTTGGTGATGGAATGCAGTGTCCC
CCATCTCCGTTGCTTTTTGACCCTTCTGCTGAACAACCTTTCAAGGACATTTCAAGAACA
CCACTTGACGTAGCTGCTGATGAATCTCAAAGGGCCCCTGGGAGCCAACCTCTGTTGACA
GCAGAGTCCTTAGTGGGAGCGGCAGGCCAGAGTCAGTTGCAAGCCGTGGGGTTGTCCTCT
TCTGTGCTTACAGACCCTTCAGATGAAAGCCTGGTGTCACCGACAGTGTCTACACCCAAT
GGCAACGTAGATTCCCAGTCTTTCACCTGA
>g205
ATGTGGGAGTTCACTGACTCCTGGATCTGTACCCCCGTTACTCAGCAGCAAGTCCCAACA
TCACAGGACAACAAACGATGCACAGTGGACAGCAGAGTGACGCGGGTGGCTTGGCTGAAC
CGCAGCACCATTTTGTACACCGGCAACGACAAGTGGTCAATAGACCCTCGCGTGGTGCTT
CTGGCCAACACTAAGAGCCAGTACAGCATCGAGATCCAGAATGTCAACATTTACGACGAT
GGACCTTATACCTGCTCTGTGCAGACGGACAATCAGCCGAAAACATCCCGCGTGCATCTC
ATCGTCCTGGGTAAGGCTTTGCGTTTCTGGACGCTGTAA
>g204
ATGGAGGATATCCATGAGCAGCAAGAGGTTGCCCAAGAAATCTCTGATGCTATTTCTCGT
CCAGTTGGGTTCGGTGAAGAGTTTGATGAGGATGAATTGTTACAAGAATTAGAAGAATTG
GAACAAGAGCAACTCAACGAACAAATGGCCGACGTTAACCTGCCAAGCGTGCCGTCCAAG
AAACTGCCTTCCCGGCCAGGGAGTGTACAAAAAGACAGAGATGGAAAGGAGAGAATGCAT
ATGGACATGTGCTTGTTCCTAGAGAAGATAGAGATGTTGTAA
>g196
ATGATTGAGAATATCGACACCTGCTTAAGTTTCTTGGCAGCCAAAGGAATCAGTATTCAA
GGCCTGTCCGCCGAGGAGATCAGGAATGGGAACCTGAAGGCCATTCTGGGTCTGTTCTTC
AGCCTCTCCCGGTACAAACAGCAGCAGCAGTCGTCACAGAGACAGCCGCCGGGGATCAGC
CCGCCGTGCCAGCAGATCTACCACCCTGCGGCTTTTACCCATGCCCAGCCGAGCTCGCCC
GCCGCAGCCCCGTGCCAACAACCGCAACAACCTCCTTGCCCGCAGACGAAAGCACAAGCA
GAGATGCACTCCAGGCTCCCGGCTCCCAGCTCGAGACCGGCAGCTGCCGGCGGTGAAGCC
AAACTGCGAGGTCCGGCCGGCAGCAACAGACGCAGTCAGAGCTTTAACAACCACGACAAA
GCCAAACCGGCGCAACCTCCGGCGGCCGACAAAGGACCCGTAGAGGGCAGCGGCTCTCAG
CCGGCAGGAATGATCGACAATGCCGTGTCCTCCTCCATCCCGCAACCGAACTCCGCCAAC
AAGCCGTGGCGCAGCAAGTCGCTCAGCGCCAAACACGCGTCTTCCGTGGTGTCCGTCAAG
CAGCCGGTGCCGGAAAGCCCAAAACAACCGGCAGAACCTCCAAAGCCGGCCCCGAACTCA
CAGAAATCCATGCTGGAAAAGTTAAAACTGTTTAACAGCAAAGGGAGCTCCAGATCCTCT
CTGGAGGGATCCCGCGACGTCAGCTGCGACCGACTCGACGCTCTTCCCAGCTTCGAGGAA
GCGGATGAAATGGAGAACGCGCTTCGCATCGCAAACAGCCCCAAAACGGCACTAAAGGGC
ATCGCGCAGCGCACGCTCGGCCGCGCCTTGACCAACAAAAAGACGTCTCCTAAGGGCAGC
GAGAAGGACAAGCAGAAGGACAAAGAGAAAAGTAAAGACTTGTCAAAAAGAATCTCCCTC
CCCGAAAGGCCCGACAACGAGTCGCCGAGGGAAGAGCAAGCGGCAGCTGCCGGCGACGGG
CCGAAAAAATCCTCCAAGATCTCGAGCCTCATCCCCAAAGGTGGGAAGCAGAACAACCCC
AAGAAGGAGGCCCCGGCTCCTTCGCAAAGCGGAATACCAAAACCAGGAGCCAAAAGTACC
CCAGGGAAAGCCTCAAGTGCCCCGCCGTCTGCCAAGGAGGGGGAGAAGATCCGGACCGGG
AAGCACGGGTCCGGGCTCTCCGTTCACAAGTCCAAGCTGGATAACAGGAATTCCAGCTCG
TCGTCGAGCCTGGCGTCGTCTGACGGGAAAGGCGTCGGTGGCGCGGGGGCCGCGGGGCAG
CCGATTGCCGGAACTCAGGCCTCGGGGAGCAATACAGTCAGCGTGCAGCTACCTCAACCG
CAGCAGCAATACAACCACCCGAACACGGCCACCGTGGCACCCTTCATGTACAGGTCTCAG
GCAGACTGCGATGGCGATGTGTCGGTGGAAAGCAGCTCAGGAGGAATCCACGTGGAGCCG
TCTGTTTACACTAAAGGAGGACAGCCCTGTGTGGAAGACGTCGCTGGAGAAGATCCCGAA
ACCAGACGCTTGCGCACCGTTAAAAACATAGCGGATCTGCGCCAGAACTTGGAAGAAACC
ATGTCGTGCCTTCGGGGGACGCAGATCACTCACAGCACGCTGGAAACCACGTTTGACGGT
AACGTTACTACTGAAGTGAGCGGACGCAATATCCTGGGTTTATCGGCCAGGCAGACGCCG
TTACCGTGGAGGCTTGGACAGTCCAGCCCGCGCCTGCAGGCAGGTGATGCCCCTTCCATG
GGCAACGGATACCCTCCACGAGCCAACGCCAGCCGCTTCGTCAACTGCGAGCCAGGACGG
TACATGTACTCCGCGCCCCTGAGGAGGCAGCTAGCGTCACGCGGGGGCACCGGTACCCAC
GCGGACCCCTCGGATAGGGGCAGAGATGAAATCGGTATGGAGAACATTAGTATCGATGCT
ACCGGTTACATGAGCGATGGAGACGTTCTGAGCAAGAATATCAGGACTGATGACATCACC
AGCGGTTATATGACAGATGGAGGGCTGAGCCTTTACACGCGAAGACTGAATCGATTGCCG
GAGGGAATGGCTGCCGTACGAGAAACTCCACAACGCACTGAAACCGGCGGCCAAGGAGAC
GCTGAC
>g203
ATGGCAACCCCATTTGTACCGGTCCCTCTCCCCATGGGAGCTTCCTCTTCAACCAATGTG
GCAAGCAGAAGCCAAAGGAGGTGTTCCCTTGGCAGTACCTCAACTAGCTCAACTTCCTCA
AAGGATCCACAAGAGGAGCCCCATCCTTCATGCTACAAAAAGATGAGCGTTCCTGACCAA
GTGAGCTGCACCTCCTCTGCATGTAGCAGCCCCCTCATTAGGACTAAGTTTGATTCTTCA
GTGGAGTACAACACTCGCCCGGGTACAAGTGACCACATTGCTGATGGATCCGACCTGGAA
GAGAGGCCCTCTACTCCAACCATACTAGGATATGAAGTGATGGAGGAAAGAGCAAAGTTT
ACAGTTTACAAGGTCTTAGTTAAAAAAAGCCCAGAGGAGAGTTGGGTTGTGTTCAGAAGG
TATACCGATTTTTCAAGACTTAATGACAAGCTGAAGGAAATGTTTCCAGGATTTAGACTG
GCTCTTCCACCCAAACGCTGGTTTAAAGACAACTACAACTACGACTTCCTAGAAGAACGG
CAGTTGGGTTTACAAGCGTTTCTGCAGAACTTGGTGGCCCACAAGGACATCGCAAATTGT
GCTGCCGTAAGACTTTTTCTTTGCTTGGACGATCCACCTGGTCCTTTCGATAGTTTAGAA
GAAAGCAGAGCCTTTTGTGAAACTCTGGAAGAAACAAATTACAGGCTCCAACGGGATCTT
TCAGATAAGCAGAAGGAGCTTGAGATGTTAAAGAGATTATTAAATGAGAAGCAGATACAG
ATACAGGCATTGGAAACCCGGATACAGGAAATGTCAGGAGGACAGGGGAGCAGCCGTCGG
CACTCGGCTGAGGAGAGTGAATGCAGTGGAGAGGTGGAATCCTCTGCCATAGAAGCTGAC
CAGGCTGCCTCAACTGACAACTGTTCTTCTAAAGACAGTCAAGAGAACTGCTGGGAGCCC
CTGCACGGGGAGGAACATCTGCCGGAAATTGAAGTAGCTGAGGTAGCAGATCCTGACGAA
GGCGTCTAA
>g207
ATGGACAAATCGATCAAAAAGGGAAAGAAAAAGGAGAAGAGAACAACTGCCAAGAAGGGG
GATAACATGACTTTTCCGGAAGCCCTCTTGGCCTATCAGATTCAGGCAAAAGAATCTATG
ATTCAAATATTACAAGCCGAGTTTACCCAGCTTGAGGAGAAGAATTCCCGCTTTAATGAA
AGGAATGAGCGCCTGCGGGCAGAGCAGAAGGCTCACATCAAAGTTCTTCTGGATGAAGCG
AAAGCTGAGGAGGAAGAACTTTCTAAGAAAGAGGTGGTCAACCGAGAGCAGGTAGACATG
GAGATCAAGCAGAAGTGGGACTTTATTCGTGAGAAGAGACGTCTGTTTGAAGAGCTTCGT
TCCGAAATAAAACGTCTGGCGGAACAGAATGTGGAAAACCAGCGTGAGCGAGATTACTGG
TTCCAGTACAAGAACGTAGGGAGCCGAGAACACGCCAGACAGATCCGACTTCTGGAAGAA
GAAATAAAGAGTCTAACACAGAGCTTCTCAGAAGTGGACGGATATTTTGAAAAACAACTG
GAAACATCTAAAGGCGAAGAAGCTTTGGAACATCTAAGCGCGGCAAACCAGAAACCTATC
GATGAGAACGCATGGCTGAAGAGCCAGATTACATATTATAGGAAGGAGGTCCAGGAGCTG
GAGGAGAAGGTTCACCAACTCGAGCAGGAAAATCTGGAGATGCAGATGGCACAATATAAA
ACCAAAGCCATCAAGGACGGTGAACTGCGCGGCCCAGCGCTGGAGAAATGGTTACCCATA
GAAGGTCGGGCTATCCAAGTACATCCACCTGACCCTCGAACGGACGATCCTGAAAATCCA
CGCCACTCGCGTCCTCACAGCAGACAGAAATGGACCATAACACCATCAATGAGAAGGATG
GCCATGTCGTAA
>g211
ATGGGAATGGGATCATTGGTTGTAGTTACCACTAGGCACCAGGATCTCAAGGCTGGTATC
ATAATGCAGGATGTTCACCCCACATGGTTTGAAAGCTTCCACTATGCACAGATCACCCAC
TTCGTAGGATCTTTCCCATAATATGGAAAGAGTCTGGATCAAGATATTTACTCTGAGACC
TCAGGTCATTTTAGAGATACTTTAATGAACCTGGTTCAGGGTGTAAGAGAAGAAGGATAC
GCAGATCCTGGCATGGCGGCTCAAGATGCCATGGTTCTATGGGAAGCATGCCAAAGGAAA
ACCGGGGAACATAAAACCATGTTACAAATGATATTATGCAACAAAAGCTACCAGCAATTA
TGGATAGTTTTCCAAGAATTTCAGAATATTTCGGGGCAAGATATAGTAGCGGCTATTGAA
GAGTGCTATGAAGGAAATTTTCAACAGCTTCTCTTGGCAATTGTTGCTTGTGTACGCGAC
AAAGCATCGTATTTTGCATACAGACTTCACAGCGCAATTCATGACTTTGGTTTTCACAAC
AAAACTGTAATAAGGACACTGATCTCTAGAAGTGAAATAGATCTTATGAACATAAGGAGA
AAATACAGGGAACGATATGAAAAAACATTGTTTCATGACATTAAGGCAGCAGCTTCAACC
TGGCAGGCTGTTGAAACGAAACTGGACCTCGAAAAAAAGTTCTGCAATCAGCAGAGCAGC
ATCCAGAATACAGTGAGGGACTCTGCAGATTGGTACGTGAGTATGGCACAAGAAGAAAGA
AAAGAGATGACTGCTGCACCTGATGGCAGGAGATCAGGAGTTCTCATAGGGAAGGCTAGC
TAG
>g202
ATGGGAGATGAGGTTAACGTTGTATTCGATATCTTCCTGGAGGAAGAAAATTCCATGTAT
CTGTTAAATTTAAAGTATGTCCTACCCTTCACCATGAGTGTGAGTGTGCAACCCAACATG
TCTCAGGAAATGGACACTTTGGAGTCCCATCCTTCTCACATTAGTGAGACAGAGGCCCCA
AGTGTGCCGAATTGTGCCAAACATAATGAAAGACCCCCACCGGTCCAATCCGTTGCTGAC
TGGAAGATCATCCTACACCTGCCAGAAATAGACACGTGGATTCGAAGCACATCTGAGCGA
GTGAGGGGTCTCACACAGTCAGTGCAGGAGGACCCCCAAAGTAGGCATGTGGATGTGCAT
CTAATGCAACTGAAGGAGATTTGTGAGGATATCTCAGACCATGTGGAACAGATCCATGCT
CTGCTGGACACAGAGTTCTCCCTGAAGCTCCTCTCGTACTCGGTCAATGTGATTGTCGAT
ATCCACACAGTGCAGCTTCTCTGGCACCAGCTGCGGGTTTCTGTACTTGTATTGAGGGAG
AGGATTCTCCAGGGGTTGCAAGACAGCAACGGCAACTACACTCGTCAGACTGATATCCTG
CAGGCATTCACCAAAGAGAACCAGGAGGACAGGCTAGATGCTCTAACAGAGGTGGATGGC
TCTGGGCAGCTGACTATTCGATGCCCCTCAGACTACCTCTCCCTAGACTGTGGGATCACA
GCCTACGAATTATCAGACTATAGTCCCAGGGACGAGGAAGAGGTCCACACTATCTCTGCC
AAACCTCTGGAGGCCTGGACATATAACGCAATGCAGCAGGAATTCCCAGATTTGGTTAGG
GGCTCCGGACTACTTAGTGTTGTCTCGGATGGTGAGACGGAGCAACAGAGCAGTGAACAG
GAGAATAAGCTAGTCTCGTCACAAATGGAAGAAGCAGGACATCCTCCACTCAAGTCCTTG
CCTCTTACTGAAGGTAGCACTCCAAAAAGACCTCTGCAGGAGACCAACGATCATGGTGGA
GACTCACCTACCCGCCCCTCTCTCCCCAAGAGGGGTCTGTTTTTGAACAAAGAAGAAGAT
TGGGAGCAGTCAGGTGCAACAGAAACATCTGTGAAAATTGGCTCACCTTCTTCATCTCTT
CCTTCATCTTCATCTGCTCCCTCCAACCACCTTGCTCTGAGCCTGTCACCCACACATTCT
CCTGTCGGCCCTTCATTACACACAAATAGATTGCAGGTAGAGGAGGAGAGAGCGCAAGAT
ATGCTGGACACTAAACAGATGGGCAGCCAGACACACCAGTGCATAAATAACAATGATTCC
CCAAGTGACTCCAATCCGTCAGGATGCAGCACTCCCAAGGAGAGCCAGACAGATACACAA
CATCACAGAGCATCGGATTCACCACCACAAGAGCTAGGAACAAGCAGCTGGTATGGCTCT
GATGAGTTCCTGGCTCTTCCCTCACACTTGCATCAAGCAGATCTTCTTGCCCTGCATCTA
GGTAGCCTCTCACAGTTGGTATCTCCTAGCCCTGAAGAGCCAGCCCTTAGAGATGTTGAG
GACTGGGAGATCAGCTCAGGGTCAGAAGTAGGCGCCGGTTCACCGCGATGCTTCTCTCCC
AGTACCCCTAGCGATCTGGCTTTGCATGCAAATGGAAGTGGTCGGTCGACCCCATGTCTC
GGTAGGCCATTGTGTGGTGTACGGCAGAAGAGAGCAGCGCTCGTACAAAGACTCATGTGG
GATATACAGAGACAGGACAATGATCGCCATGTGTGGGAGAGAATCCAGGGTTTTGTATCC
AAGCTGGACCGATTCATTCGCTGGTTACAAGATGCTATGGAAGCCACCGAGAACTGGACG
CCTCCTCAGCCTGAGACGGAGGCGCTGCAGCAGTACCTGCACACTCACTTGAACTTTAAG
CAGAGCGTGGATGATCACTGTGCTCTTAAGGACAAGGTATTGGAAGAGGGACACAGGCTG
ATGGAAGTGCTAGTGTCACACAGACCAGGCTTTCTGGAGATGTTGGAGATGATCACTTCT
CAATGGAAAGAGCTACAGAAACAGATACGGAGGCAGCACGGCTGGATTATGAGTTCTCTG
GACACCATCAAGGCAGATATTCTGCAGGCGGATGGAGATGTCGAGGAAGAGTCCCAAACA
CAGAATGGACCACAGAGCTCAATAGAAGCCAAGAGAGATGCTGTATCGCAGATGTCACTG
CAGCTGAACCGTACTGATTATTCTCCGAATCCTCCAAGTGGTTCTACCCAAAAGCCCTTA
GAGCTCAGCCTGAGGAGTGACAGCATGCAAGAGATGGAAGCAGAATGTGAGGAGTTCTGG
GACTGGTTGCTAGACATGGAGGCCACTGTGAAGAACAGCCTAGGGCTGCTGGTATCTGAG
GATCAGCATCTGCAGATGTGCAAGGTTTGTCCCTATAACTTCATTTTGGAAGCTGTCTGA
>g223
CTCCAGGCCGCGTGGGAAGGAGAGCTCTGTGGATTCACGCTGATCTGTAACGATGGATCC
GGGGACTGCATGGGACATGGCGGCCAGCAGCCCGCAGTGCGCATCCTACACGGGGGCTCA
GACAGGCCAATCCGAGCGTCGGTCCGAGATAACCAGGACGGCACGTACCACGTCTCATAC
ACCCCCGCGGAGCCCGGGGAGCTTTCCGTCAGCATCCTCATCAACGGTCGTCACATGCAG
GGCTCTCCATTCAGCGTGCCGGTGAAGGGCAAATCGCGCAAGCACCCTGGGATCTACCAC
TGCTGCTCATTTTGCTCCAGCGGGGGGCAAAAGGATGCCCGCTGCGGGTGTGGAGGCACC
ATGCCAGGTGGGTACCAGGGCTGTGGTCACGGTCACAAGGGCCACCCCGGACACCCTCAC
TGGTCGTGTTGTGGTTGCACCACAGAGAAGTCTGAGTGTTGGGGCGTTAAGGACACGGCC
CCCCGGAACCTGCTTAGGACAGTCGCTCTATAA
>g212
TTTGTTCCATATGCCCCGGAGATTGTCTCTCTCACATACGATTACCAGTCCGACACACTC
TATGCTACGTGGCACTGGAATACGTCCGGTTGTCTTGACGGTGTGGAGTTGAAATTTGAA
ATACAAATACTTCGTGGTGAAAACCTTGACGTTGTAACAACGGAGTCGATGATCAGCGTG
TGCGCCCAAAATAATACCAGATTCCCATGGAGCTGGGTCTCTGACGTCCCGTTGCTCTGT
ACCTCCCACTCCATACGGGTTAGATGCTTTGTTAATGAAGAACATTACTTCGGAGACCTC
AAGTGGAGCCAGTGGAGTGGAATGCGTACAGTATATGGCAGCTCTGAAGTAGACGTTATG
TATCCTGACGAGAAAGTGGTTGCTGTCGGGTCAAACGTAACATTTTGCTGCATCGTGAAG
GAAGGCATGACGATCACCTCGATACAGTATAACTCGAACGGAGTTACACCTTTCAAGCTC
GGCAAGAACGCCAGTGCAATTCAATTAAAGAATATGAGCATGTCCATCGAGAGCGGGGAT
AACCTTTTCTGTAACACGAGGGAGGATGCGTATGAAGCGGGCATGGGGGAAAGCGCGTAT
CCCATAGGAACGGTGGTCTTTGTTGGATACCCACCCGATAAATTAAGGAACTTCACCTGT
GAAACCCGCGACCTCAAACAAATTAACTGCACGTGGGATTTCGGTAGAACAACTGGGTTA
TACGGGCACCGGAAAACAATTTACGTCTTACATGAAAGCATCTCGGGAAAGAATGTCTCT
TGTAATGAAGAGGAGTGCACGTGGCTGGATTTTAGTGCAATAAAGAATCAGAATCTGTAT
AATTTTTCGCTAACAGCCTCTAATCCTTTGGGGCAGTCGGAGGCCTTTCTTGCTATCAAT
TTGACTGAGCAAATTTATCTTTGGCCTCCGAGGGAACTTACCGTACGGGAAAGCAGTCCT
ACGCAAGTTTCTCTGTCATGGAAGTTAAATGGAAGGTTTGCTTTGCTCATGCTTCTGTGC
GAGATTCAAACAAATCTTTCCAATGGAGGAACAAGAACGCGCAATGTCACCTTTTCTGGA
TTGGATGATGGATTCTATAATTACTCTATAGCCAACTTGCGTCCGTTTCACACCTATGAG
TTCCGAGTCCGTTGTGCGTCTATGGATCCATTCTGGAAGTGGGGCGATTGGAGCGTTTTA
AAGAAGCATCATACGTCACCAGCAGCCCCTTCCAGAAAGCCAGATATCTGGAGGGAAGTC
ACAGGGGGTTTGGAACAACGAACCATAATGGTCTACTGGAAGCCTTTGTCAACCAACGAG
GCCAATGGACCAGTACGTTCCTACCAGGTGTCTTGGAAGCCACTTGAGAGTAACGCAGAA
CAAAAGTCCAACCTGCTGTCCGCGATGCACAACCACACGCAGATAAACGCCAGCGGGGAT
AAAGAGGATTATGAAATCAGCGTGGTTGCCATCAACGATGCTGGACTTTCTCCCGTTGCG
CGGATAACAACCGCGGAGCTTCCAAATGATGCTGTTGAGATGGAACGTCAGATTGGATCA
GCGGAGGGCATTAATATCACCTGGCATTGGGATAGAAATGTCTCCTGTGGGCATGTCATT
CAGTGGACGCCTGCGTTCCGTTCCCACGCCTCGACGTTACTGTGGAACCGGCTTCCGTCT
CACCGCACCAGTGCGTTTATCCATTCAGACCAATTCCTTGCTGGCATAAGGTACAACATT
TCCGTATTCGGATGTAAAGAAAACAAATATCAGCTTTTCAAGATGTTGACTGGATACACC
CAGGAATTA
>g222
ATGTGTGAAGTAGAGATTGGCACTCGTGTGTATGCAAAGATGTGTCTTCATGCTGCAAGG
TATCCACACTGCACTGTTAGTGGGGCCCTTGTGGGCCGCAGAGGGAATGGATGTGTCACT
TTATGTGATTGTGTGCCTATCAATCATCTCTATCTTCCCTTGGCGCTCAGTTTAGAAGTG
GCTCTCACACAGATTGATTCATGGTGTGCTCCCCAAGGCTTGGTTATCGCTGGTTATTAC
CAAGCAAACGCCGGGCTGAAGGACAACAGTCCTGGTTGTGCTGCTCAACGTACGGCGTCT
CTCATTTCAGAATATCAGGAAGATGCTGTGTTAATAATGCTAGATAACGAGCATCTGTCT
CTGAATCCCGGGGTCCCTCCTCTTACTGTTTTGCACCAGAACAGCAACAAAGACTGGGTA
CCCAAGGAAAAGACATTGGTCATGTGGGGCCATTGGGAGGAGACCCAACGAATCACAAGG
CAGCTTCTTCACGCTAAAGCCTATCAACGACTGGTTGACTTTGACACTCACCTGGATGAC
ATCAGGGCTGACTGGACCAATCAGGAACTGAATTTGGAAATCGCACGTCTGTCTGCAGCA
GCAAATGGCCGCACCTAG
>g219
ATGGAGCGTCTTCCACCAGCTGTGAGAGAGTTTGTTGTGAGAGGGGCTGAACTCTGTGAT
CCCCAAAACATTCACATCTGTGATGGATCCACAGCAGAAAATGACACCATAATAACTCTT
TTGCAACAGGAGGGAATGTTGAAGAAACTGCATAAGTACCCCAACTGCTGGTTGGCACGA
ACTGACCCGAAAGATGTAGCTCGAGTTGAGAGTAAGACCGTAATTGTGACAGAGAAGCAG
AGGGACACTGTACCGATTCCTGTACCAGGAGTTAAAGGACAACTTGGGAACTGGATGCCT
CCTCAAGAATTTGAGAGGGCAAAGAGTGAGCGTTTCCCTGGCTGCATGAGAGGTAGAACC
ATGTATGTGCTGCCATTTAGTATGGGCCCAGTTGGCTCCCCTCTGTCTAAATATGGGGTG
CAGCTTACTGACTCCCCATATGTAGTTGCCAGCATGCGCATAATGACACGGATGGGTGCA
CCTGTGCTAGATGCCTTGGTAGATGGAGACTTTGTGAAATGTCTACACTCTGTTGGACAA
CCCCTTCCCTTGAAAGCCCCACTGGTGAACTCTTGGCCCTGTAATCCGGAGAAGACCCTC
ATTGCCCATGTTCCTGATTCTCGTGAAATTGTTTCATTTGGCAGTGGGTATGGAGGGAAC
TCTCTCCTCGGGAAAAAATGCTTTGCTCTGCGCATTGCTTCTCGAATCGCCAAGGATGAG
GGCTGGTTGGCTGAGCATATGCTGATCTTGGGGATCACAAACCCTGCTGGACAAAAAAGA
TATATCGCAGCTGCCTTTCCTAGTGCCTGTGGGAAAACTAATCTTGCCATGATGCGTCCA
GCGTTGCCTGGATGGAAGGTACAGTGTGTAGGGGATGACATCGCCTGGATGAAATTTGAC
AGTCAAGGTCGTCTCCGAGCCATTAATCCAGAAAATGGCTTTTTTGGAGTGGCTCCAGGG
ACTTCAGCAAATACCAATCCCAATGCATTGAACACAGTGGAAAGCAATACAATATTTACC
AATGTGGGAGAGACCAGTGATGGAGGAGTTTACTGGGAGGGACTCGATCAACCATTGCCA
CCAGGGGTCACTGTCACCTCCTGGCTAGGAAAAGCCTGGAAGCCAGGTGATAAAGAGCCC
TGCGCTCACCCGAATTCACGTTTCTGTGCTCCTGCTGCTCAGTGTCCCATTATGGATGAT
GCCTGGGAGTCTCCTGAGGGTGTCCCTATCGATGCCATTATATTCGGTGGGCGAAGGCCA
GAAGGAGTACCATTGGTCTACGAGAGCTATAACTGGAACCACGGGGTGTTTGTTGGAGCC
TCTATGAGGTCGGAGGCCACAGCTGCTGCAGAGCACAAAGGAAAAGTCATAATGCATGAC
CCATTTGCCATGAGGCCTTTCTTCGGTTATAATTTTGGACACTACCTGTCTCACTGGCTG
AGTCTGCAGCACAGAGAAGGTGTACGTCTTCCCAAGATCTTCCATGTCAACTGGTTCCGA
AAGGATGAGCAGGGCAGCTTCTTATGGCCTGGATTTGGAGAGAATGCACGAGTACTCGAC
TGGATCTTCCGCAGAGTGGAAGGAGAAGAGAGTGCCCGTGCGAGTCCCATTGGATACCTT
CCTGCAGAGGGGGCTCTGAACTTAGAAGGTTTGGGTGGGGTAGACACAGAACAGCTGTTT
TCACTACCCAAAGGATTCTGGGAGAAGGAGGTACAGGATGTGAAGACTTACTTGTCTGAA
CAAGTGACTGATGATCTGCCCCAGCAAATCATGCAAGAGTTGGAGGGCCTTGAAGGAAGA
GTAAAGCACATGTAA
>g227
ATGCCAACTCTTGAAGGACAGAAACCCCGAGGTGCCTGCCATAGAAATTGGGTCGACCAA
CTGGCTGGAGACTTCTGTTCCCGTTTTCTGTTTGTGCCGGGAACGGTCAAATGCGGATCA
AACGATTCTCTCCAGCAGGCGGCCGATGTTTCCCAGATGAGAGGCGCCCGAGTGATCTCC
GCTGAAGATCTCCTTTTCCTCATGCGCAGAGATAAGAAGAAGCTCAGAAGACTCCTGAAA
TACATGGGCTTTCGTGACTACAAATCCAAAATACTTAAAGGCATAGAAGAAGAGGATATA
GAAGAGAAGCTGAACAGCATGGCCAATGCCAACAAACGGCAGAAACTGGCCCAGGACTTC
CTCAGCTCCATAGACCAGACTGGTGAGCTTTTGGCCTTGATGGAAGACGATGAGATTGAT
GAAGTTAAACAAGAACGAATGGAGAGAGCAGAAAAACAAACCCGAAGTATGGATTCCACG
CAGTATGCCGAATTCTGTGAAAGTCGCCAGCTGAGCTTCTCTAAGAAGGCTTCCAAGTTC
CGGGACTGGCTGGACTGCAGCAGCATGGAGATAAAACCGAATGCTGTAGCCATGGAGATT
TTGGCCTATCTGGCGTATGAGACCGTGGCTCAGCTAGTGGATCTGGCCCTCTTGGTGAAG
CAAGATATGGCGCCGAAGACGTGCGACCCTTTCACACACGCAATGTCCGCCACCTTTACC
CAAAGTCGGAATTCTTCTGAGGCGCCAACTTTAAAGAGTAATCCTGACACGCCAGAAAAT
ACACCGCCTGCCACCCCCACCCCGCCATCTTCACACCAGGGCAAAAGCCAAGCCGGAGCT
CTGGGAAATGGCGGTCTGGGGCAAGACTCCAAAACCAAGCAGAGAAAAAGGAAAAAGGTA
TAG
>g226
ATGATGTCCGACGCATGTGCATACCTGGAGCAGGCCAGTGACGTCACTGCAAGGCCTTTC
ACCCCGTTCCACACCTACCTGGCCTTGGATAAACCGGGAAGTAAGTTCATTAGGGACCCC
AAAGAAATTGCCTCATTGTATCGGGACCTCAGCCAGTTCCCATCACTTTCGAGTGTTACG
ATTGGACCGGATGTCACCACACAGTATGGGGGCCGATACAGCAATATCTACACTGAGTGG
TCGCAAAGAGACTTGGACCGAAATGAGCAAATTAGGTTTTGCCGGCAATACATTGTCTTC
CACGATAACAACACTATTGTGTATTCTGGAGCTTGTGGGAATGGCTGCGAGATTAAGGGC
GAGCTTCTAAGCAGAGAGTCTCCTTCTGGAGCATTGAAAGCTGTTCTGCGAGAGACCAAG
AATGAGAAGGGTGAGAACTCCCAGTTTTTAGAGGTTTGGGAGAAGAATCGCAAAGTGAAA
AGCATCAACCTGACAGCCCTAGATAAACATGGCAAAGTGTATGAGGATGAGCAGTTTGGA
TGTCTGTCCTGGTCACACTCAGAGTCTCACCTCTTGTACATTGCTGAGAAGAAGCGGCCC
AAAGCAGAGTCCTTCTTTCAGACATGTACTAAAGAGCTGGGTACAGGAGCATCTGAGGAA
GAGGACAATGCAGTTAACAAGCCCATCAAGGGTGAACAGTTTGTGCTTCACGAGGACTGG
GGGGAAGGACTTGTGAATAAAAGTGTTCCAGCTTTGTGTGTCCTGGATATAGAGAGTGGC
AACATTTCTGTACTGGAAGGAATACCAGAAAATATATCACCAGGACAGGCATTCTGGTCC
CCTGATGACACCGGTGTGGTATTTGTTGGGTGGTGGCACAGTCCTTTCCGACTTGGCCTG
AAGTATTGTCCTAATAGGAGATCTGCCTTGTTTTTCGTGGACTTGACAGGGGGGAAATGC
GAGACGCTCTCCACGGACACAGCTTCTGTTTTCTCTCCCAGACTGAGCCCAGACAAGTGC
CGCATTGTATATCTAAAATGTGAAGAGTTTGGACCTCACCAGCAGTGCTGCCAACTCATA
ATGTATGACTGGTACACCAAAGTGACGTCCACTGTAGTGGATATTGTGCCTCGAAGTACT
GATGAGCAGTTTACTGGTATCTACACTTCATTACTGGCATCCTTCTGCTGGTCTGCAGAC
AGTCAGCGAGTGGTCTTGGATACGGTGCTGCGCAGTAAGCAGTGTCTGTTTGTTGTTGAC
ATAATGTCCAGAAAGGTGACACAGCTGCTGTCCAAAGGTACTCCATTGGGTAGCTGGAAG
CTAATGGCCATTGACAGAGACCTTCTTGTTGTCACCTTTTCATCTCCAAGCTGCCCTCCT
ACTCTGAAAGTAGGTTTGCTACCTCCCAGTGGAAAAGAAGAAGAAATGACGTGGGTGTCC
TTGGAAGAGGAAAATCCTATGCTAGACGTCGAGTGGAGCTTTAAAACTCATCAGCCTCCT
CAAGAGCAGGAAAACTCTAAGTACCATTTGGCAGCAGGGCTTGAAGAAGCTTTGATCCAT
TAA
>g238
ATGAAATGTGTATCCTCTGAAATCGGGCTGATTCTGATCTGTACGCAGAATGGAACTGCA
AATGGCGGCACCCTCTATAAGAAGCCATTTAATGAATCCTTTGAAGAAGCACCAATGTAC
GTTGCTGTACTTACCTATATAGGCTTCGGAGTGGTCACATTATTTGGTTACCTACGAGAC
TTTATGAGATCATGGGGACTGGAGAAGTGTCATATGGCTGAAGAAAGGGAAGAACAGAAA
GATTTTGTGCCCCTTTATCAAGACTTTGAAAATTTTTATACAAGAAACCTCTATATGCGA
GTACGGGATAACTGGAACCGCCCCATCTGTAGTGTGCCTGGTGCCCAATTTGACCTAATG
GAGCGATTGACGGATGACTACAACTGGACATTCAGGCATACGGGGAGAGCCATCAAAGAT
GTGATAAACATGGGATCTTATAACTATCTTGGCTTTGCAGAGGTTGACGAGGAGTCATTG
GGCACGGTGAAGGACATGGTAGTTAGTTATGGAGCGGGAGTATGCAGCAGCAGACAGGAA
ATGGGTCATTTGGATAAGCATGAAGAGCTGGAAGACCTGGTTGCCAAGTTCCTTAACGTA
GAAGCTGCTATGGTGTTCGGTATGGGCTTTGCTACCAATTCTATGAATATCCCAGCCTTG
GTTGGCAAG
>g235
ATGAGGGAAATCGTTCATCTACAGGCGGGGCAGTGCGGCAACCAGATCGGGGCAAAGTTT
TGGGAAGTGATCAGCGATGAACACGGGATTGACCCCACAGGAACTTACCACGGAGACAGC
GACCTGCAGCTGGAGCGTATTAATGTTTATTACAATGAGGCATCAGGTGGAAAGTATGTC
CCCAGGGCCATCCTTGTAGATCTAGAGCCCGGTACCATGGATTCAGTCCGCTCTGGGCCT
TTTGGACAGATCTTCAGACCAGATAACTTCGTGTTTGGTCAGAGCGGTGCTGGTAACAAC
TGGGCAAAGGGTCATTATACGGAGGGCGCGGAGCTGGTGGACGCTGTGATGGATGTGGTG
AGGAAGGAATCTGAAAGCTGTGACTGCCTACAAGGCTTCCAGTTGACCCACTCCCTCGGT
GGCGGCACGGGTTCAGGAATGGGCACCCTTCTGATCAGCAAGATCCGCGAGGAGTACCCT
GACCGTATTATGAACACCTTCAGTGTAGTGCCATCCCCCAAGGTGTCCGACACGGTGGTG
GAACCGTACAATGCCACGCTTTCTGTGCACCAGCTGGTGGAGAACACGGACGAAACCTAC
TGCATAGACAATGAGGCCCTGTATGACATCTGCTTCCGTACCCTGAAGCTGACAACTCCC
ACCTATGGTGACCTCAACCACTTGGTCAGTGCCACCATGAGTGGAGTCACTACCTGCCTA
CGCTTCCCTGGCCAGCTCAATGCAGACCTTCGTAAGTTGGCTGTCAACATGGTTCCCTTC
CCGCGTCTTCATTTCTTCATGCCGGGCTTTGCCCCATTGACCAGTCGCGGAAGCCAGCAG
TACCGTTCACTCACAGTCCCTGAGCTCACTCAGCAGATGTTTGACTCCAAAAACATGATG
GCCGCATGTGATCCAAGACACGGGCGCTACCTAACCGTGGCCGCTGTGTTCAGGGGCCGA
ATGTCCATGAAGGAGGTGGATGAGCAGATGCTGAACGTTCAGAACAAGAACAGCAGCTAC
TTCGTGGAATGGATCCCCAATAACGTCAAGACGGCAGTGTGTGACATCCCACCACGCGGT
CTAAAGATGGCCGCTACCTTCATCGGCAACAGCACCGCCATCCAGGAGCTGTTCAAGCGC
ATCTCCGAGCAGTTCACCGCCATGTTCCGGCGCAAGGCTTTCCTTCATTGGTACACCGGA
GAGGGAATGGACGAGATGGAGTTCACAGAAGCAGAAAGCAACATGAACGACCTGGTGTCA
GAATACCAGCAGTACCAGGATGCCACGGCGGAGGAAGGAGAGTTCGAAGAGGAAGGAGAA
GAGGAAGTTGCTTGA
>g237
GATGATCCTTCCCTGGAAAGGCATTTTAAGGGCCACAGAGATACAGTCACCAGTGTGGAT
TTTAATCCGAACATGAAGCAACTTGCAAGTGGTTCTATGGATTCCTGTTTGATGATCTGG
AACATGAAACCTCAGATGCGGGCGTATCGCTTCGTTGGCCATAAAGATGCCATCCTGTCT
GTGGAGTTCTCACCTTCAGGGCACCTCGTGGCCTCTGCATCCCGAGATAAAACTGTCCGT
TTGTGGGTTCCTAGTGTAAAAGGAGAATCCACGGTGTTCAAAGCCCACACAGGAACCGTC
CGAAGTGTTAGTTTCTCCAGCGATGGCCAATCCTTGGTTACTGCTTCTGATGACAAAACG
GTGAAAGTGTGGACTGTACACAGACAAAAGTTTCTGTTCTCTCTGAACCAGCATATAAAC
TGGGTGCGCTGTGCCAAGTTTTCTCCAGATGGAAGGCTCATCGTGTCCGCAAGTGATGAC
AAAACCATAAAACTGTGGGACAAAACCAGCAGGGAGTGCATACATTCTTTCTGCGAACAT
GGAGGGTTTGTGAATTATGTTGATTTTCATCCGAGTGGTACCTGCATAGCTGCTGCGGCA
ACAGACAACACCGTGAAGGTGTGGGACATTCGGATGAATAAATTGATCCAGCATTACCAA
GTGCACAGCGGAGTGGTAAACTCCTTATCCTTTCATCCATCTGGAAACTACCTCATCACC
TCTTCCAATGACTCAACCCTTAAGATTCTTGATTTACTGGAGGGTCGATTACTATATACA
CTTCACGGCCATCAGTGTAAAGGATATAAAGAATGGAAACCGTTGTCTACGTACTACAGT
GACCAGTTTCGGAGAATGATAGAGCTGGGAATGTGTGGCACGGGCCACAACAATGTCCTT
CTAGATAAAACAATTTTGGGATGGCTGACAACCCCAAGG
>g239
ATGCAAGTGACCGAGGGGAACCCTTTGATGCTAAGCTACACCTTGCAGGACCTTTTTGGC
CACGACACCGTTCAAGTGGAGCTTATTCCAGAAAAGAAAGGCCTGTTCCTGAAGCACGTG
GAGTATGAAGTTTCAAGTACGTTCTTCAAGTCTGCGGTGTACAGACGTTACAATGATTTT
GTGGTGTTCCAAGAAATGCTGTTGCAGAAATACCCCTATCGCATGGTGCCTGCCCTGCCG
CCCAAGAGGATGCTGGGAGCCGACCGTGAGTTCATCGAGTCACGCCGACGGGCTCTAAAG
AGGTTTATCAACCTTGTCGCCAGGCACCCATCTTTCTGGGACGATGTGCTTGTGAATATT
TTTCTTACCTACAACGGTCAGGACATACAGAATAAAATGCGGGAGTCTATTCGAGGTGTG
GGAGATGAATATATCACTTGTAAGATGTCTGCTCAAGCTAAGGATTTTCTCCCGGGTGAT
ATCCAAGTCCAGTTTGCCGCCAGCCGAGAGCTTATCCGGAACATATACAACAGCTTTTAT
AAGCTGCGAGACCGCGCGGAGAGAATGGCGGCACGAGCCATCGACAACGCCACCGACCTT
CTAGGGTTTGGCAAAGAATTAAGTGCCTTAGGCTCGGACACCACTCCTCTACCATCCTGG
GCAGCTCTAACCCACGGCGCCTGGAGCTCCCTGAAGCAGGCGCTGAAAGGATTATCCGTA
GAATTTGCTCTGCTCGCTGACAAGGCAGCGCAACAGGACCTGTGCGAGAGACACGAGAAG
GGAGTGTTACACAAACACCAGAAAGCCTTACACAAGTACAGCCTGATGAAGAAGCAGATA
ATCAGCGCCTCGGTACAGAATAAGGAAGGAGAGTCCGTGGAGCAGCTGGAGTCCCGCATC
GCAGAGCAAGAAAATGCCATAATGGCCATGGAGCTCCGGAATCACTTCTCCTTGTATTGT
CTGCACCAAGAAACGCAGCTCATCCACATCTACCTGCCCCTGACCTCCCATATACTCGGG
GCTTTTGTGAATTCACAGATCCAAGGGCACAAAGAGATGAACCAGGTCCTGAATGAAGCT
AAAACCAAAGTTGAACTGCCTGTTCGTGGGAACAAGCAAACGGCCTCCCTTCGCCTCCCC
TTTCCCCGGAAGAACGCAGTTTTTTCCCCCGCTAGGGGCTGGGGATTCAGTAGGGTGCAA
AAATGA
>g248
ATGGAGCAGCAGCAGAAGCTTGTAAGAATAGAGCAACAGGAACAATTGAAGCAAAAGGCA
AGCTATTATGTGGAGAATATCATGAAGCCACGTGAAGAATTAAAACTTAAACGGAAAATG
GAGCATTTTTACAGGATGACAGGTCAAAGTTGGAAATTAACAGAAGGTCACATGCTTGGG
GATGGGGAAGGCTGTGATTCATTGAATAACTGTGATGAGATTGATAGAGCTGATGAAACT
CCAAATAATGAAGCTCTAAGGAAAAGGAAACTTCCAGAGCAAGCTACAAAGCCTATACCT
AAACTAGAACCGCCGCCTCCTAAGAAG
>g247
ATGAGCGAGCAGAGGGAGCGGACCTTCGTTTGGGTTCCTCACGGTTCCGACGATGAGGAA
GAGGAGAGGCCGTACGCAGAGGGATTTGGCCCCATTAATGGAGATGAAGATAGCGCCATG
TTTATCGAGCAGTGCGGGATGCTCTTAGACTGTCACGAAGACGTCTCTGACGCGGCCCCG
GGGGAGGAAAGCGAAGAAAGTTTGTTCGAGGCGGATAAGAAACGCAGCCCCTCCAGCGGC
TCCCCCGTGAAACCCGGACCCAGCGGCAAGAGCGCCAGCAAGCTGGCCAGCATCATCGCG
CACCTCCAGAACCTGGCGAGCGAAAGAGAGTCCACCCGGCAGGACGCCGGAGAGGAGGAT
GATGGCGGATTTCAGACGTTCACCGCCGCAGACATGAACTTTGACGAGCAAGCGGAAGGC
CTGGCCTCGGCCCGCGCTCACTCCTCCGACCAAAGGTTAAAGGCGTTCAAAGCCATAAAA
ATCCTGCAGGACACGGACGCCAAGGACAAGAAGTACATCTGTGTGGAGTGCGGCAAAACC
AGCCGCTACAAGTCCGCGTATTTACGGCACAAACGGACGCACACGGGCGAGAAGCCCTTT
AACTGCACCGAGTGCGGCAAATGCTTCCGGAGGAGCTCTCAGCTGGTGACGCACCAGCGC
ATCCACACCGGCGAGAAGCCCTACACCTGCCTGCGCTGCGGCAAAAGCTTCAGCTGCAAC
TCCACGCTGGTGACGCACCAGCGCACGCACACCGGCGAGAAGCCCTACATCTGCCTCGAG
TGCGGCAAGGGATTCATCCACAGCTCTGACTACAACCGGCACCACCGCGTCCACCGCGGA
GAGAAGCGCTACACCTGCAAGGAGTGCGGCAAGAGCTTCAGCCAGAGCTCGTACCTGGTC
ATCCACCAGCGCATCCACACCGGCGAGAAGCCCTTCGTCTGCAACGAATGCGGAAAGTGC
TTCAGCCGCAACTCCTCGCTGGTGACGCACCAAAGGGTGCATACGGGGGAGAGGCCCTAT
ACATGCGCCGAATGCGGCAAGAGCTTCCGCCAGAGCTCCCACCTGCTTATCCACCAGCGG
ACCCACACCCCAGACAGTCACTTGGCCCTGCGCGCCATGATGTGA
>g256
ATGGACAGAAGACTCAACATCACTCCAGAAGCCTTCGATCAGCTGTTGAATGAACACAAC
ATGAGCAGACTAGAGTTCATAGCAGCTTATGGTCTAAAACCTTTGGTCTACATCCCAGAG
CTGCCCTTTAATGCCAAGGTCATCTTCCTGGTGTTGTACATCATAATCTTTATCTTGGCT
TTGTTTGGCAACACGCTGGTGGTCTATATCATTATAAGGAAGAAGGCCATGAGGACAGCC
ACCAATATATTCATCTGTTCCCTGGCCTGTAGTGACTTGCTGGTAACTTTCTTCTGTATC
CCCTTCACTCTGCTACAGAACATCTCTTCGGAGTGGCTGGGAGATAAATGCCAGCACAAC
CCAATACCCCCTGCTGATGATCTGAACTTCTACCTGGAGTTTGCATAG
>g257
ATGAGCTCTTGTCAAACGGGAATTCCAGAAAATGAAAAACCAACGCAGGAACAGTTGGAG
ATCCTTGAGTACAACTTTAATAATGTGAGCAAGCAACCTGACCAAACAACCATAATGCTG
ATAGCTGCTGAAGCAGGTCTCACAGAGGAGAAAACAATGCAATGGTTCAAAGTCCGATTA
TCAGAATGGAGAAAATCAGAAGGCTTACCTTCACAATGTGGATCTGTTATGGACTAG
>g253
ATGTCGTACAAGGAGAATCTCAACCCGTATTCTCACAGCAAGCAGTTCACCACTCCGTCC
AGTGGTCAGGGCCCTCAGCGAGTCCTGAAGAAGGAACCCTTTGCGTCGAGCTTCACGACC
CCATCTGATTCGTTGCTTTTACAGAGGGCGCAGATGTCCAGAATTACCCCCTCTGTGAAC
TCCCATTTGTCAGGCGGTGCAGGGAGGGTGGCGATGAGTTCTGACGCTGCTTCCCAAAAG
CCTGCAGAAGGTCCCAAGAGGATATTCACAATCGATGACTTTGACATCGGACGTCCACTG
GGGAAGGGCAAGTTTGGAAATGTCTACCTGGCCCGTGACAAGAAAACCAAGCTGATCATG
GCCTTGAAGGTGCTCTTTAAATCTCAGCTGGAGAAGGAGTCTGTGGAGCATCAGCTACGA
AGAGAGATTGAGATCCAGTCCCACCTCAGGCATCCAAATATCCTGAGGCTGTACAATTAT
TTCCACGACCGCAAACGGATCTACCTGATGTTGGAGTTTGCTCCTCGGGGAGAGCTCTAC
AAGGAACTGCAGAAATATGGCCGCTTCGACGAGCAGAGAAGTGCCACATTTATAGAGGAA
CTGGCCGATGCTCTGACTTACTGCCACGAGAGGAAGGTCATCCACAGAGACATCAAACCT
GAAAACCTTCTCATGGGATATAAGGGCGAGTTGAAAATTGCAGACTTTGGTTGGTCTGTC
CATGCGCCATCGCTAAGGCGCCGAACAATGTGTGGAACCCTGGATTATCTTCCCCCAGAG
ATGATTGAGGGCAAGACTCACGATGAGAAGGTAGATTTGTGGTGCATGGGAGTCCTCTGC
TACGAGTTCCTCGTTGGAACGCCTCCGTTTGACAGCCCGTCCCACACAGAAACCCACCGC
AGGATTGTTAATATTGACCTCAAATTTCCAAGCTTCATGTCTGACGGAGCCAAAGACCTG
ATCACTAAACTCCTGCGCTATAATCCAGCTCACCGTCTTCCCCTCAAGTGTGTGCTGGAG
CACCCCTGGATCAAGGCCAATTCCCGCAGAGTCCTTCCTCCCTCGTTCAGCACCACGCAC
GCCAGTTAG
>g244
ATGCTCGAGAGACACGAACGCCTCAAACCAGAGATGTTTGCCGAGTTACTTCAGACTGCT
AACACAGCAGACGACTTTAGGAAATGTCCGAGCAATTGTGGCCAAAAGATCAAAATCCGT
CGAGTCCTGATGAACTGCCCAGAGATTGTAACAATCGGTCTGGTTTGGGATTCTGATAAC
TCCGATCTGACAGAAGACGTTGTACGGAACCTGGCTACTCAACTTTACTTGCCGGGGTTG
TTTTTCAGGGTCACTGATGAGCAAGCAAAAGAAAGTAGACTTTACCTTGTGGGTATGATC
TGCTACACGAGCAAACACTACTGTGCCTTTGCCTATCACACTAAAAGTGCCAGATGGGTT
CTCTTTGATGACGCATCCGTGAAAGAGGTTGGAAACAAATGGAAAGATGTGGTCACAAAG
TGCATTCGCTGTCACTACCAGCCATTGCTTCTGTTCTATGCTAATCCAGATGGTACGGCT
GTAACTACAGAAGATTCTCTAAGGCAGGTCCTACATTGGTCTCATTACAAGAGAGTGTTC
AACAATGAGAATGGAGGCAGCGAAAGAATGCCGTGTGGATCAAAAAGTCCAGATCATGGC
AGAGAGGAGACTGCTGAGCATATCTATCAGAATAGTGGCCCCAGGTTTCAGATGGAGGAT
TCTGGATTTCATCGGGGTGTTCAGTCAAGTGCTGGCAGAGGACCTGTTAAACTGAGTCGC
AATGATCCACAAGAAAAGCTAAAAGACATATCCAGGGAGTGTGCGCAAAGAGCCAATAAC
CTGAAAAGCACATCGTCCTCGCAAAGAAAAAATGTGGATAAACAACAGAAGAGAGAAATT
CCCCGATCCAAGGAGACATCTAGTGGAGGTGTATACCATTCAAAGCCCTACACAGGAGCA
CAATTAAAGTCTGGTTCTTCTCCTCCTCGAAATGGTTTCCGACAGTATCCTGAGCCACAT
GTTTACAGTAGCCAAGGGAAAGGACCGTACAAGCAAGAAAGACCTGCTCATCAGGCAAGA
GAGACGTCCTCAGTTACAGGACAAGTTCCAATTCCTGAACCAAAACAAGTAGCCAAAGTG
AAAAGTTCCAGTTCCACTGGCTACGAAACAGACAGCAGCCAAGACAACAGAGGCAACATT
CGAAACAGGAAACCTTGGAAACCCATGCGGGAAACTCTAAATGTGGACAGTATATTTAAT
GAAAATGAAAAAGGCCCACAAAGCCCTGGGCATGTAACGAACACCAACGGTAAACACCAA
CCTGCCAAGGACCAGGCTTTTAATCCTAACTCTAAGGACAGCCCTAAACGCAAAGTCCTA
ATGACCATCTATGAAGATGAGATAAAACAGGAATCTGGCAGCAGAAGTTCATTGGAGTCT
GTAGGGAAGAACCAGGCAGAAAGGATCAAACTGAACTCGGATTCCAAGGCTTACCACCTG
GACAGCTGGCAGATGCAGAGGACCGAGTCTGGATATGAGAGCAGCGATCACATCAGCAGT
GGATCAAGCAATCTGGATTCGCCGGTCATTGAAGGAACGAGTTTTGCTGATTTAAAAAGC
ATTCCAGAAACAAGCTTGTATGGTGATCATCGTCAACTGGGAAATGTTCTTCCGACCTCC
GGGAGCCATTTCAATGGTTTCAACAAAGAAAATAATGGTTTGGAGCACAGATGTGCGGAT
AAACTTTCTCCTGATGCGTGTGAACCTCTTCACAGCCCTGCATGTCAAAGGAGACTAGGT
ATGGATTCCAAAAGAGACCAACGACCGCCAAACCTTTTGTATGCTACTAAAGATTATGGT
GTGAAAGAACTTCACTTGAACAAATCACTTGATCCTCAGGAAAGTTCAAATCAGATAAAT
GCTGTATGTTTAGAAAATCGCTGTTTGCACCATGAAAATTCTCCATCTCCAAGAGACACT
CCAGTAGCCCCAGGAAAAGTGCATTCCACCGGTGGATTCATGAATTCTCCATTGCAACTT
CCTGCTGGCAGCGCTTCCTTAACAGGAAGTTTTTCACCACAGGTCTCGCGAAATAGGCTG
CAGCATGTAAATTTCTTCCAGTTTGGTGAAAATGACATTTGCTGCATGGATCACCAGAAT
TTAAATAATATACCTCCTCCATTACCCCCTAAAAAATACCTAAGAAACGGCGTGCAAAGG
ACTGAACAAAATGCTGCGCCAACAATTAATTCTAGACTTGGAGAACCCTTGTCCCGTCCT
CATGCAGTCTCTTCAGAGACCTTCTTACCCAATGATTTCATGAGACCAGAGTCAGATGAA
GATTACTATCCAAGAAAAGATGCCGTTTACAATCATGAACTCCATTTTACTAAACCAAAC
TTGGCTGGCTCCTCTGCTTATGACTATCGATCAAAGCTGGTTCCACATGCCTTGGGATTA
GATCCAGGTTCTCCCAGTGGAAGTGATACAGTTTCTCTGACAACATATTTTTCTGTTGAC
AACTGTATGACGGACACCTACAGACAGAAATACCACCAAAGGCCCAGGGTCTATGTTTCG
GAGAGTTCTGGATTCAACAGGGATCCCTTTCAGCTAACAGAAACTATGGTGAATCCAGCA
TACCATCGGACACTTGACCACGCTCATCCTTCTCTCGTATCAAGATCCAAACCTTCCATA
GGAAATTTACCTTGTAATAGGTAA
>g266
ATGGCCTCCCTGTTCAAGAAGAAGACCGTGGACGATATAATAAAGGAGCAGAACAAGGAG
CTAAGAGGCACGCAGAGGGCCATAACCCGAGATCGAGCCGCCTTGGAGAAACAGGAGAAA
CAGCTGGAGATGGAAATAAAAAAGATGGCCAAGACAGGCAACAAAGACGCGTGCCGAATT
CTAGCGAAGCAACTGGTGCAGCTCCGCAAGCAGAAGACTCGCACTTACGCTGTGAGTTCC
AAGGTTACGTCCATGTCAACGCAGACAAAGGTTATGAGTTCCCAGATGAAGATGGCCGGA
GCAATGTCTACAACAGCAAAGACAATGCAAGCCGTAAACAAAAAAATGGATCCTCAAAAG
ACTCTCCAAACAATGCAGAATTTCCAAAAAGAAAACATGAAGATGGAAATGACAGAAGAG
ATGATAAACGATACACTGGACGATATTTTTGATGCATCTGAAGATGAAGAAGAAAGCCAA
GACATTGTGAATCAAGTATTAGATGAAATTGGCATTGAAATTTCTGGAAAGATGTCCAAA
GCACCGTCAGCAGCCAAAGGATTGCCCTCTGCCTCTACTTCTAAATCTACTATTTCAGAT
GAGGAAATCGAGCGCCAACTAAAAGCCCTAGGAGTAGATTAA
>g260
ATGTGGAGGCAGCTCCTGGACCACGGCAGGACGGCCGTTGACTACCACTGGCCGGCCAGC
GTCATCGTCCCTGCGGCCGTCGGGGTTGGAGGTGCTCTGGCCTGCTGGATGCTGAGCAGG
AGGAAGACCAAATCCATTGACTTGGGAGATGGATGGTGGGGACCGAGTGACCGGCCTCGG
CAGGAGGACACCGGCATCAGACCTTTCCGCGTGGAGGTGCTGGATGATGACCTGAAGGAT
CTGTACGAGCGATTGGATAAAACTCGATTTGCTTCACCTTTGGAGGATTCCAAATTCCAC
TACGGTTTTAACACCGCCCACCTCTCGAAGGTCGTCTCTTATTGGAGGAACACGTTTGAT
TGGCATAAGCAGGTGAAGATCCTTAACGGATACCCTCACTACAAAACCACGATAGAAGGA
CTGGAGGTGCACTTTATCCATGTGAAACCCCCAAATCTTGCCCCCGGGCAGAAGGCCCGC
CCCCTGCTCATGGTCCACGGCTGGCCTGGATCCTTTTATGAGTTTTACCGAATCCTGCCG
CTGCTGACCGAGCCGGCCAAGCATGGTCTGAACCCCGACCTGGCCTTCGAGGTCGTCTGT
CCGTCCATCCCGGGTTATGGCTTCTCGGAGGCGCCGCACAAGACAGGGTTTTCGGCCTTT
GACGCCGCTCGGATATTCTACAAGCTGATGCTGAGGCTCGGATTCCAGGAGTTTTACCTC
CAGGGAGGAGACTGGGGCAGCAGGATCACCGCTCTCCTCTCCCAGATGAAGCCAGAATCT
GTGAAGGGTCTCCACCTAAACTTCGTGATCCTGTCAAAAGGAGGGCTGGGGATGATGACC
TCCCTGCTTCTTGGGCGTTACGTGCCCTGGTTGGTGGGGCTGACCAAGGAGGACGCCAGA
CGCATCTATCCGTACTTTGAGAAGAACGTCTACGCCATTCTGTTGGAGTCGGGATATCTA
CATATACAAGCGACCAAACCGGACACAGTAGGCTGTGCCCTGAACGACTCTCCGGCCGGC
CTCGCTGCCTACATTCTGGAGAAGTTCTCCACCTGGACAGATTCCCAATTCCGGGATCTG
GAGGACGGAGGCCTGGAGAGGAAGTACTCGCTGGATGATCTTCTCACCAACGTCATGATC
TACTGGGTGACTGGATCCATCACGTCCTCCATGAGGTTCTACAAGGAGAACTTCCCCAGG
AATTATGCCAAAACCCCAGACACCAAGGTCGGCGTCTACGTCCCGACGGGCATCGCCGCT
TTCCCATGTGAACTGGTTCATACTCCGCGTGTGTGGGCAAAACACAAGTTCCTGAACATC
GTCACCTACACCCACATGCCCCGCGGGGGCCACTTCGCAGCCCTGGAGGAGCCCGAGCTG
CTGGCTCGAGACGTCCAGAACTTCGTTTCCAAGGTGGAGAAGAAATGA
>g261
ATGTGGAGGCAGCTTCTGGAAGACGGCAGACTTGCAACGTTTCCAGACTGTGCGGTTCTG
CTTGAGCACAGGTCGGCCTTCAATGACCACTGGCCACGCAGCGTCCTCGTCCCGGTGGCC
GTCGGCGTTGGAGGCGCGATGGTCGGCTGGATGTTCTGCCGGCGGAAGGCGAAGACGATC
GAGATGGGCGATGGATGGTGGGGATCGGGCCTCAGACCTCATCAGCAGAGCGAGGACTCC
GGCGTGAGGCCGTTCGCGGTAGAGATCTCCGAGGCCGATATTCAGGATCTCCGTAGCCGT
TTGGAGCGGAGCCGCTTCCCCTCCCCCCTGGAGCATTCGCATTTCCATTACGGATTAAAC
GCTTCCCACCTTCAGAAGATCGTCTCCTACTGGAGGAAGAGCTTCGACTGGCAGAAGCAG
GTGGAGCGCATTAACCGATACCCCCACTACAAGGTCACCATAGAAGGACTGGAGGTGCAC
TTTATCCATGTGAAACCCCAAAATCTTGCCCCCGGGCAGAAGGCCCGCCCCCTGCTCATG
GTCCACGGCTGGCCTGGATCCTTTTATGAGTTTTACCGAATCCTGCCGCTGCTGACCGAG
CCGGCCATGCATGGTCTGAACCCCGACCTGGTCTTCGAGGTCGTCTGTCCGTCCATCCCG
GGTTATGGCTTCTCGGAGGCGCCACACAAGACAGGGTTCAATGCCGTGGCCGCTGCTAGA
ATTTTCTACAAACTGATGACCAAACTGGGATTCAAAGAATTTTATCTTCAGGGAGGAGAC
TGGGGCAGCATAATTACCACCATCCTCTCCCAGATGAAACCAGAGTCTGTGAGGGGTCTT
CACCTGAATATGGTGTTTGATCCCCTGGGAGGCCTGAGGATGTTCCTGATCCTGTTTCTG
GGACGTTACGTGCCGTGGCTGGTGGGCCTGACGCGGGACGACGTCGAGCGCCTCTATCCG
TTTTTCGAGAAGAATGTTTACGCGGTGATGCGAGAGTCGGGGTATCTACACATTCAGGCC
ACCAAGCCCGACACCGTGGGCTCGGCTTTGAACGATTCTCCGGCCGGACTCGCTGCCTAC
ATCCTGGAGAAGTTCTCCACCTGGACCGACCCCGAGTTCCGTCATTTAGAGGATGGAGGC
CTCGACAGAAAATATTCTATGGATGATCTTCTGACCAACGTGATGATCTACTGGCTGACC
GGATCCATCACCTCGTCCATGAGATTCTACAAGGAGAATTTTACCCGGAACTTTCTGAAC
TCCCCGGAATCGCGGATTGGCGTGTACGTCCCCACCGGCATCGCGGCCTTCCCCTGCGAA
CTCACTCACATCCCCCGTGTTTTGGCGAAGGAGAAGTTTAAGAACATCGTCACCTACACC
CATATGCCACGAGGGGGGCATTTCCCAGCCATGGAGGAGCCCGAACTTCTCGCTCAAGAC
ATCCAGAACTTTGTGTCCCGGGTGGAAAATAAATGA
>g270
ATGCCTGGCCACAATGGACTTACTGGGAGAGATGGGAAAGACGGCCCCCCAGGGGAGAAA
GGAGACCCTGGTGAATCTGGAAAACCAGGACCTGTTGGGCCTCCAGGTAAAGTAGGTCCA
CCAGGCGTTACTGGTCCCCAAGGCCATCCTGGTCTTCCAGGTCCTCCAGGTCCATCATCG
TCACCTGAAAAGAGTAAAGTCTACGCCTTTCATGTGGGTCTTAAGAACTCATATCCGCCA
TCCAACACACCAATTAAATTCACTAAAGTTTTTTACAATGAACAAAATATTTATAACACA
GAGACTGGTAAATTTGTTGCTCCGGTAGATGGATTGTATTTTGTAACCTACCAAATTACA
GTATACTCGAAAAATGTGCACCTTTCACTCCGGCATAATAATAAGATTGTCCAGTACATG
TATCATGTATATGGTTCTAGTACTCATCAAGCTTCTGGAGCTTCGATTCTAAAGCTTAAC
AAACACGATGAAGTTTGGCTGCAGGACGTTGATGGTAATAATGGTCTTTATACTGATGGC
AATGACGACTCCACACTTTCCGGTTTTCTAATTGGTTGA
>g263
ATGGAGATGTCCACCTCAGCTCCTGCCCATGTGCTGGGCTCCGGCCGCCGCTCCGGGCTC
CCTGTGGTAAAGGCTCTGTTCTCCTGCGAGGCTGATACCGCCATGTCCCCCGTCAGTAAC
CTGGCCCTCAACATGGATCAGCTGGCATGCCTGGGCAGTAAATGTGAGACCCCTAAACGG
AAGTTGTCTGACCGCTGGTGTATGCCGAGAACCGACTCGTCGGACTCCGTGGATGCAGGT
CTCTTTCTGGAATCGCCCCGTGCTCTGGATTTCAAAGACATTGATGAAACGTTTGAAAAA
GCCGTTCTTGATGCTGGAAGACCTATAAACTCGAGGTTACCGGTTGGCAGAAGACGCTCC
CTGCCGCAAACATTCCTAGGTTCCAGCCCAGCATTCAAAAGGAACCTTTCAGACTCTCTA
GGCTGCGAAGTCTTGCATTTAAACGACTCTGAAAACAAGGAGAATGAATCCTTCCAGTTT
AAAATGCCTGCAAGACCGGCTCGTGGCAGCCTACGGTCTCTGTTTCACGGTGACGGCAAG
GAGAGCCTCGTGCAAAGGCAGAAATCTGCCCCTGGCTGTATGTTTGCATCTTCAGGAGAC
GCTGAAGTCTCGCCGGGTTCTTTCTTGAGGAGAAAGTCGTCTTGCGCTTCCACTGCAACT
GACGGCAGCGATGACGGCTTCCTGGAAATGCTGGACGGGGAGGAAGAGGAGAATGATACG
GAGTTTCCCTGCGCTATGGCGAGTCTCTGGACTGCGCCTCTGGTGATGAAAAGCACCGAA
AATCTCTCCGAGGCGCTGTCTCCTTCCGTACATCACCCTTACCGGGTGGCTCACAAGCGC
ATGGAGAGGACGCAAGGTGAAGAGGCGCCTGAGAAAAGCAAGCGGCGGAGGAGCATGCTC
GACGTCCCCTGCGCGGAGGAGTCCGGCCGCGATGTGAGTCCGGCGCTGATGCGGTCAAAA
TCCATTTCAAAGGAGACGATGGAAGATATATTTGATAGCGATCAGAGGGATCTTATAGGA
GACTTCTCAAAGGCCTTTCTCTTTCCTACTGTAAGCGGGAAGCACCAGGAGTTGAAGTAT
ATTACCCCGGAGATGATGGTTATGATCTTAAACGGCACGTTTGAGGCTTTCATTGAACGC
TATGTGATCGTTGACTGCCGGTACCCATACGAGTACGGCGGCGGACACATAAAGGGAGCC
GTTAACCTGCACATGGAGCAAGAAGTCGAAGATTACCTGTTAAAGAATCCAATCAAGCCG
ACGGGTTCCAAACGCGTCGTTCTCATCTTTCACTGCGAATTCTCGTCGGAGCGAGGGCCC
AGGATGTACAAGTTTTTGCGGGAGAAAGATAGAGGCCTGAATGAATACCCAAATCTGCAT
TACCCGGAGCTCTACATCCTACAAGGTGGATACAAGGAATTCTTCCACAAATCCAAGGCG
TGGAGAGCGGGGATTCTCCAGGAGCGCTGGGGCTCGACAAACTTTTGTTCTGGTCTCGCT
ATCTCTGTATTCCAGGCCTCCCCGGATCACTTTGCGTTGCTGCGGTGA
>g267
ATGAGTTTCCAAGCTTTTGTGACAGCTGATTCTTTTGTTCCATTAAATTCTGATTCTTCG
GCTACGTTTCCACTAAGGATGCACCACAGCGCAGCTGAGTACCTTCCCGTCAGCAATCAC
ACAACCAATGTGGTCTCTACAGTCCCGTCTGTTTTATCTTTGGTCCAAATTCCTAAATTT
TCTCATATGTACTCCTCTGCGCCTAATGTGGAAAATATGCCAGCAGGCCTGCATTACCCA
AACCCATCATGCCATTATGGAAACCAGCAATCTACCTACGGGGTGATGGCAGGGGTCCAT
ACGGGTAGTCTACCCCCTTGCCTTATGAGCGCTAGCTCTTGCACACTGGGTCACGGATTT
GCCCCTGTGCATCAGACACTTCTGGGAGAGGATATCACAACTGCAGACTTCAAGCAAGAA
TTCCGTCGAAAGAATAAACCAATTGAAGAGCCAATTGACATGGATTCTCCAGAAATCAGA
GAATTGGAAAAGTTTGCTAATGAATTCAAAGTTCGAAGGATTAAGCTAGGATACACTCAG
ACTAATGTCGGAGAAGCGCTTGCTGCTGTGCACGGCTCCGAATTCAGCCAAACTACAATA
TGTCGTTTTGAAAACTTGCAACTAAGTTTTAAAAACGCTTGCAAGCTGAAATCTATTCTA
TCCAAATGGCTGGATGAAGCGGAGCAAGTTGGAGCTTTATACAATGAAAAAATTGGTGGA
AATGAGCGAAAAAGGAAGCGCAGAACAACTATTAGCATAGCTGCAAAAGAAGCACTTGAG
TCCCACTTTGGTGAACAAAGCAAACCTTCTTCACAAGAAATCATGAGAATGGCAGAGGGC
TTGAATTTGGAAAAGGAAGTGGTTCGTGTTTGGTTCTGCAATAGAAGGCAACGAGAGAAA
AGAGTAAAGACGAGTTTGCACCAGAATACCTTCAGCTCTTTTACAAAAGATCACCATGAA
TGCAGATGA
>g274
ATGGGTGACCTCTATGGACTCTTAAACTTCTACAGTTTCTCCCGTTGGATCTTCATGGGA
CTTGTTACCCTCGGGCTCATCATACACCAGCGGCGATACCCGCATCTGCCCCGACCTTTC
AAGGTACCAATTATTATACCCCTGGTGTTTACCACGCTCTGCCTGTTCATTGCGGGGATG
TCCCTGTACTCGGACCCCCTGAATACGGGTATCGGCTGCGCCCTCACGTTGAGCGGGCTG
CCCGTCTACTACCTTACCCTCCATAAGTCGAGACTACCCCTGCGGTGGAGAGACAATTTC
AATTTCCTGACCACGAAGCTCCAAGTGTTGATGGAAGTGATCCCCCAAGAGGTGCAAACC
TACTAA
>g271
ATGCTGTCCCTGCGGCGCGCCCTGTACTCTGTGCGGCTCCATGTCGGGACAGTCGCACCG
CAGCGCGCAGTCAGCACCGGCTGGTCTCCGGTGGGGGCCGCTTTCAATGTCAAGCAGCAG
CGGAGGCTGGACGTGTTTAGCAAGAACTCGGGTCTTTTCGGAGTTCCTGAGTTAAGTACC
CCGGAGGGATTTCGGATAGTTCAGGATAATGCCCTGAAGAATACAGAATCCTTGGTGGAG
AAAGTATGTTCCACGCCGCCAGGTGCCGACACCGTCAGATTATTCGATTGCCTGTCTGAT
GAGCTCTGCAAGGTGGCCGACCTGGCTGATTTTGTGAAAGCTGCCCATCCGGACTCTTCA
TTCAGAGAGGCTGCTGAAGAAGCGTGTAGAAACATCGGTACCATGGTGGAGAAGTTGAAC
ACAAATGTTGAATTGTGTCAAAGTTTAAGGAATCTTTTAGACGACAAATCTGTTCTGGAC
AGTTTAGACCCTGAAACCAGACGAGTAGCTGAACTGTTTTTGATGGACTTTGAGATCAGC
GGCATCCACCTGGATAAGGATAAGCGTCATAAAGCAGTGAACCTCAACGTTGAAATCTCT
GATTTAAGCAGTGACTTTCTAATGGGATCAAACCTCCCCAATAGAATTGACAGTCAGATA
ATCCCTGAACATATCCGCTCTCAGTTTGCGTGGGATGGAAAATACATACAGATCAATGGT
TTACACCCAGATTCACCAGATGATTTGGTACGAGAGGCGGCTTACAAGATATTTCTTTAT
CCAAATGCCAGACAGCTGAAATGCTTGGAGGAACTACTTGCTTGCAGAAATCATTTAGCC
CAACTCGTGGGATACCCCACATTTGCGCACAGGGCATTATTGGGGACCATGGCAAAAACA
CCAGAGAATGTGATGATGTTCCTTGAAAATTTATCCAGCAAATTACGCGAACGTACCCAC
AAAGACTTTGAAATGATGGCCGCGATGAAGACAAAGCTGAATCCGATAAATCCAGATTTG
ATGCCTTGGGATCCTCCGTTCTATGGTGGTGTTTCACGTGCAGAGAAGTAA
>g280
ATGAATGTGGAACATGAAGTTGGTCTTCTGGTGGAAGAGATACGTCGCCTTGGTTCTAGA
GGGGAAGATGGGAAGCTGAGCGTTAAGTTTGGTGTGTTGTTCGCGGATGACAAGTGTGCC
AACCTCTTTGAGGCTTTAGTAGGGACACTAAAAGCTGCCAAACGTAGGAAGATCATCACA
TACCAAGGGGAACTACTTTTACAAGGTGTTCATGATAACGTTGACATTGTGCTACTCCAA
GATTAG
>g284
ATGGCTGCCGCACTAGATGAAACTGGAGTTAACATAGGGGGAGCTGGATCTTACATCTAT
GAGAGGAAACCTAGTGAAGAGAAGCCTACTTCTCTGACAAAAGCAGCTCCAAAACCAGAA
GAGAAGATGACTAGCGGCCCAACTAAGAGCCTGACTAAAGCTACCAGCATTACCACCTTT
ACTGGAGAACCCAACTTATGCCCTCGTTGTGAGAAGAAAGTATATTTTGCCGAAAAGGTG
ACCTCCCTTGGCAAGGACTGGCATCGACCTTGCCTGCGCTGTGAACGTTGTTCAAAGACC
CTTACACCTGGAGGTCATGCTGAA
>g281
ATGGATTGGGAAGAAGATAATGGAGGAATCACTGATATGGAATATGTTAGCATGCAGATG
CAACAAAAAGATGTGTCAAACAGACTACAAATTGGGCAGCAGTTCTTGGAATATCTTACA
GACACCCATCGTTCTGCTCATCTTGATTTGGACTCCAGCACATTGGACAAAATTATTGAT
GAGTTAACCAACTGGGTTAATTGCAGCCACTACAAGGTGGCTTTGCTGGGATTAGACCTC
CTGAGTGCCTTAGCTGATAGGTTGCTAGAGCGTTTTCGGGGCCATCTGGCAACAGTTCTA
CCAGTTTTAATGGATAGACTTGGAGATGCTAAAGACCAAATTAGAGACCAAAGCCAAAAC
CTTATCTTGAAGTTGATGTATAAGACTGCATCGCCAGCGTTAGAACATTCCTCTATAGTG
AACATTGTACTGAAGCTAGAAGATAATTTATTTTATAACCATATAAATTTGTTTGGTGCT
CAGCAGTTGGGGGTGAGCAAGCTTGTTCCTCAGTTGTGCTTATTGTTTGGAGATTCCAAT
GCCCAAGTACGGGAAACGGCAATCTTAGCAATTGTGGACGTTTATAGACACATAGGTGAA
AAAGTGAGAGCCGATCTTTGCAATAGAGGAATACCAGCAGCAAAGTGA
>g286
ATGTCTGGTCGTGGCAAAGGAGGTAAGGGACTCGGGAAAGGTGGCGCAAAGAGGCACAGG
AAGGTGCTTCGGGATAACATCCAGGGTATCACCAAGCCTGCTATCCGCCGTTTGGCTCGC
AGAGGAGGTGTAAAGCGCATCTCTGGGCTGATCTATGAGGAGACCCGTGGGGTGCTCAAA
GTGTTTTTGGAGAACGTGATTCGTGACGCAGTCACTTATACTGAGCATGCCAAGAGGAAA
ACCGTTACCGCTATGGACGTGGTGTATGCCCTGAAACGCCAAGGCCGTACTCTGTACGGT
TTCGGAGGTTAA
>g287
ATGCCTGATCCAGCCAAATCTGCGCCTGCTCCGAAGAAGGGCTCCAAAAAAGCTGTTACG
AAGACCCAGAAGAAAGATGGGAAGAAACGCAAGAAGAGCAGAAAGGAAAGCTACGCGATC
TATGTCTACAAGGTGCTGAAGCAGGTGCATCCTGACACTGGCATTTCCTCCAAGGCCATG
GGCATCATGAACTCCTTTGTCAATGACATCTTTGAGCGCATTGCCGGGGAAGCTTCACGC
CTAGCCCATTACAACAAGCGCTCCACTATCACTTCTCGGGAGATTCAGACTGCTGTACGC
CTCCTCCTTCCTGGAGAGCTGGCCAAGCACGCTGTGTCAGAGGGCACCAAGGCTGTTACC
AAGTACACCAGCGCCAAGTAA
>g285
ATGGGGAGGTTTCAGAAACGGCGTCCAATCATAGACTCGCAGGCTACCGCTCATGAACCA
ATGAATGTGCGGCAGCTCGTCTATAAAAGCCAAACTTCTGGCGGTTTAACCCCGTGTTTA
CGTGCGATTGCAACTGTTTTGTGGCGGGATCCAGGCATTCAGATGGCCGAGACAGCTCCT
TCCCCGGCGCCTCCGCCGGCAGAAACCTCTTCCAAGAAGAAACAGCCGAAGAAGCTGGCA
GCTGCAAAAAGCCGTCCCGTGAAGTCCGGTCCCAGTGTCTCCGAGCTTATTGTGAAAGCA
GTCTCTGCGTCCAAGGAGCGCAGCGGAGTGTCTCTCGCAGCTCTTAAAAAAGCACTCGCT
GCTGGCGGCTACGACGTAGAAAAGAATAACAGCCGTCTGAAGCTCGCTCTCAAGGGTCTG
GTGTCTAAAGAGACCCTGATCCAGCTAAAAGGCAGCGGTGCCTCTGGCTCTTTCAAGCTG
AACAAGAAGCAGCTGGAGAGCAGAGAGAAGACAAAGAAGAAGAAGGAAACTCCTGTAAAG
CCTACAAAAGCAGCCCCCAAGAAGGTTGTGAAGTCGCCCAAAAAAGCCCCTGCACGAGTG
AAGAAAAGCCCGAAAAAGATCAAGAAACCGTCGGCCGCTGCTAAGAGTCCCAAGAAGCCG
AAGGTGGTTAAGGCGAAGAAAGCTGGCAAGAGCCCAGCTAAGAAGGCCACAAAGCCCAAG
GCATCCAAAAGCCCCGCTAAGCCCAAGGCATCCAAAAGCCCCGCTAAGCCCAAGGCTAAA
AAGGCAGCCCCCAAAAAGTGA
>g283
ATGTCTTACTCCAGCAGCATCCAGACCAAACAAACCATCCAGAAGCGTCAGAGCAGTGGT
GGCCGTAACAGCACCTATGGAGGTTTCAGCAGTGGCTCCCTGTCCAGCTCTGGTTTGGGT
GGAGGTTTCTCAACCCAAATTGCCAACTTCAACTATGGAAGCTCTGGTTTTGGTGGGAGT
GATGGCCTTCTGGTTGGGGGGGAGAAGCACACCATGCAGAACCTGAACGACCGTCTGGCC
AGCTATCTTGAAAAGGTTCGGGCGTTGGAACTGGCCAACAGCGATCTGGAGAAGAAAATA
AGGGAATGGTATGAAAGTCAAAGTGCGATCAACAATAGTCAAAGCCGGGATTACACCAAG
TACTACCAGATTATTGAAGATCTAAAGAACAAGGCAAGTGACAAAATGGGAATTATCATT
GTTAGCTCCACTGACAACGCACGGGTGGTCTTGCAGATTGACAATGCCAGGTTGGCAGCT
GATGACTTCAGGATGAAGTATGAGAACGAGCTTGCCATGCGTCAGAACGTTGAGGCCGAC
ATCAATGGTCTCCGCCGTGTCTTGGATGAACTGACCCTCGCTAGATCAGACCTGGAGCTG
CAAGTGGAATCTCTTAGCGAAGAGCTGGCCTTCCTTAAGAAGAACCATCTGGAGGAGATG
AATTCCCTTAAAGGCAGCACTGGCCAAGTCAGTGTTGAGATGGATGCAGCTCCAGGAGTA
GATCTCACCAAGCTTCTAAACAACATGAGAGCAGAGTATGAGGACCTGGCCGAGAAGAAC
CGCAAAGAAGCTGAAGAATGGTTCCTGAAGAAGAGCAGTGAGCTGAAAAAGGAGATTTCT
GTAGGTGTTCAAGAAGTTCAGTCTAGCCGTTCAGAGATCTCCGATCTCAAACGCACCCTG
CAGAGCCTAGAGATTGAATTGCAGGCTCAGATTTCCATGAAAAACTCCCTTGAAGGAACC
TTGGCAGAGACAGAAGGCCGTTATTGTGTACAGCTAAGCCATATCCAGACGCAGATCTCC
AGCATTGAAGAACAGCTACAACAGGTCAGAATAGACATGGAAAGACAGAGCTCAGAATAT
AAGAGACTGCTGGACATCAAGACCAGGCTGGAGATGGAAATCGAGACTTACAGACGTCTG
CTGGAGGGAGAGCTTGGACAAATCCAGCAAATAAAGTCACAGGCGTCATCAGTAGATTCC
AAGAAAGATCCAACAAAAACAAGAAAAGTCAAGACAATTGTCGAAGAGGTGGTCGACGGG
AAAGTCGTCTCTTCCAGCGTCCAGGAAATTGAAGAGAAGATGAATTAA
>g293
GGTCCGAAGGGGGAGAACGTCGGGTCCATCACCCTCCCTCTGCCCAGCAGTCACCTCATA
TTCAGAGCCGCTTCGGAATCAGACGGTCGATGTTGGATGGATGCTCTTGAGTTGGCTCTT
CGTTGCTCCAGCCTCTTTAAGATAAATGTGCCGAAGCCGGGGAAAGACGGGGACATGATT
GTCTCACCTGAGGTCAATCACACCGGCCTGTACACTTTGCTCCAGACGGCCACCATCTCT
GAACACGAGCTCTTTCAGCTTAATGAATCTTTACTGGAAAACGATGCCCTGTCCGACAAG
TCGGAGAAAGACACCATAGAAGAATCCGAAAACGAATACAGCCGCAAAACAAGTGAAAGC
GACCAGTCCGAGCTGCAAGGAGACATCTCCCTCGACCGAGAGGGAACAACCTACATGGAG
GAGCTGTACGAGGAGTTTGGGGAGATCGGTGAAGCGTCTCAAACGGAGAAAGTTTCAGAT
GAAAACAAAAGCTTGATGTGGACTTTGTTAAAACAAATGAGGCCGGGAATGGACTTGTCT
AGGGTCGTTTTACCAACTTTCATATTGGAGCCACGTTCATTCCTCAACAAGCTTTCCGAT
TACTACTACCACGCCGACATACTCTCCCAGCCTCTGATCTTGTCTACATTAGGACTCTTA
TATGGCACCATGACCATGGAGTTGGGAGGGAAAGTCACCATAGATTGCCAGAAAACTGGA
CATTCTACGGAGCTGGAGTTCAAGCTGAAGCCCTTCTTTGGTGGCAGTGACACGCTTAAT
CAGATATCCGGGAAAATCAAAGCCGGCGGTGATGTTTTGGCAAATCTAGATGGGCACTGG
GACAGAGAAGTTTTTCTGAATGACGCTCAGAGCGGCACCAGGGATGTATTTTGGAATCCG
ACCACAGAGATCCGGAGACAAAGACTGAAGCGTCACATCGTATTGTTTGAAGAACAGACA
GAGATGGAATCAGAGAGGTTATGGCAGCATGTGACAACGGCAATCTATGAAGGGAACCAG
CAGCAGGCCACGGATGAGAAATACATTTTAGAAGAGGCTCAGAGGAAAGCAGCGAGTGTG
CGGAGAGAAAGCAACGAGGAGTGGAGTCCTCATCTCTTTGTCTACAATGAGGAGCTGAAA
GAATGGCAGTACAAGCACCAAGACACCCGTCCCTGGCACCCGCTCACCGACATTGCGCAA
TACGAGAAGGACGGCATTCTGCAAACCGTGAAGAGGAACATAACCAGCATGCTGGCGCCA
GCAAAGGGCTCACAGCATAAGAGGCCGATACAAGACGGAAGACATCGCAAGGCCAGCGAG
CAACCTTCCATCAGCAGCCAAACCACCGAGAGCAGCTGCTCGACCCCAGAACCCGCGCAT
GACTCTTCTGATAGCGAAGGTTTTGCCGCCCGTTGTCCTCAGTGTGGGAAGGAAAAACAC
AAACTTCGGGAGATCCAGGCTGCGGTTTTATCTCTGCAAAAAACACAGCAAGAGATTCAC
AGACCGCTTCAGTTCAGCCCTCGTGGAGATCGCTGCTTCACTTCGCTTATCGATCGGAAT
TATAATGCATTGCAGGCAGCGCTGCGTGTTGCTGACCCTGCTGGCTCTGCTGGCCCTGGC
GGTGACCGAGATCCACCTGTGCTCATGCCAGGAGATCCACCTGTGCTCATGCCAGGAGAT
CCACCTGTGCTCATGCCAGGAGATCCACCTGTGCTCATGCCAGGAGATCCACCTGTGCTC
ATGCCAGGAGATCCACCTGTGCTCATGCCAGGAGATCCACCTGTGCTCATGCCAGGAGAT
CCACCTGTGCTCATGCCAGGAGATCCACCTGTGCTCATGCCAGGAGATCCACCTGTGCTC
ATGCCAGGAGATCCACCTGTGCTCATGTCCGCAGATCCACCTGTGCTCATGTCCGCAGAT
CCACCTGTGCTCATGCCAGGAGATCCTGAAAGCCTCCAATGTTAA
>g305
ATGAGTAACATTGGAATGAATGTAGAACAGGCCTATGGAATGTCGATGCTTCTGACAGAC
TTCTCTATTTACAAAGCCTGATATCCTAATAAGGGACTGGATGATAATTACTGCCGAAAC
CCGGATGGCAAGTCTAGGCCGTGGTGTTACACGCTTGACCCCGAGACCCCCTGGGAGTTC
TGTGCAATTAAACCCTGTGCATATAGCATTGTGAACAATACAGACCTTACTATAGACTGT
ATAAAAGGTCAAGGTGAAGGATACCGTGGTACCGTAAGAACAACATACAATGGAATTCTT
TGTCAGAGGTGGGATTCCCAATTTCCACACGAGCACAACTTTACTCCAGAGAACTACAAA
TGCAAAGATTTGAATGAAAACTATTGTCGAAATCCTGATGGTTCAGAGTCACCTTGGTGT
TTTACTACAGATCCAAATGTTCGAATTGGACACTGCTCGCATATACCTAAATGTGAAGTT
TCTAATCAGCAAGGTGAAGGGGATGCAAGTCCTTTGATGGCAAACCTGGATAGCCCAGGC
ACCTGTGCATCAACGAAACAAGTAAGAGTTGTGAATGGATCTCCGGCACAAACTAGAAAT
GGTTGGATGGTCAGTCTAAGATACAGGGATATTGACATAAAAGATTATGAAGTATGGCTT
GGGACCCACAATATTTATAGCACAACAGAAAAACATAAACAAGTTAGGAACATTTCACAG
GTGGTTCATGGGCCAAAAGGATCACATTTAGTACTTCTAAAACTTTCCAGGTCTGCAGTC
CTAAATGCCAATGTAAGCCAAATTAAACTGCCAAATTATGGATGCAAGATTCCAGAAAAG
ACAAAGTGTAACGTGTACGGATGGGGACACACTGGGACAAACAATTATGATGGCCAACTT
CATCAAGGAAATCTCCTTATTGTAGGAAATGAGAAATGCAATCAGTACCACAAGGGGAAA
GTTACTGTCAATGAATCTGAAATATGTGCCATGAGTGAAAGCTCCAACGTAGGACCCTGT
GAGCGAGATTATGGTGGCCCTCTAGTATGTGAAGAAAACAGGACAGACCTAATGCAAGGG
GTGATTATCCCAGGACGTGGCTGTGCTATCCCAAACCGCCCGGTCATCTTTGTGAGAGTG
GCGTACTATGCAAAATGGATCCACAAAATTGTATTGACATATAAAACCCCACAGTTATAA
>g311
AAGCCGTTTATCCCAAAGAATCCAAAGCGGGAGATCCCAAAAGAGGAGCAGATCACGCTG
GAGCCGGAGCTGGAGGAGGCGCTCGCTAACGCCACTGACGCAGAGATGTGCGACATTGCA
GCCATTCTGGGAATGTACACTCTGATGAGTAACAAGCAGTACTATGACGCCATAACGACT
GGGATCATTACAAACAAGGAGGGCATCAACAGTGTGGTTAAGCCAGATACATACAAACCG
GTCCCAGATGAACCTCCAAACCCCACGAACGTGGAGGAAACCCTGCAAAAAATCAAAAGC
AATGCCGCAGATCTGGAAGAAGTTAATCTCAATAATATCAAGGTCATTCCTATCCCTACA
TTAAAGGAGATTTGTGAAGCCATGAAAACAAACACTCATGTGAAGAAGCTGAGTTTAGTG
GCTACTCGTAGCAATGACCCCGTGGCCCATGAAGAGGAGGACTCACCGTCTGTAGAGATC
GCGGTTATCGTTACCCGGGCTCACACTTTGTGTCCGCAGGTGGTGGCTGAAATGCTGAAG
GAAAATAAAACTTTGCAGAGTCTGAACATCGAGTCCAACTTTATCTCCAGCGCTGGGATG
TTGTCTGTAATCAAGGCCATGAGAAGTAACAGCACGCTGTCTGAGCTCCGGGTGGACAAC
CAGCACCAGAACCTGGGAGATACGGTAGAGATGGAGATGGCCTCCATGCTGGAGAACTGT
CCTTCCATCATACGCTTCGGCTATCACTTCTTGCGGCAGGGCCCGAGGGCCCGTGCATCC
ACAGCCATCACCAGGAACCTGGATTTGCATCGCAAACAGAAGAAAGTGTGA
>g326
AAAGACGTTGGGAATGGTACCAAAGATGATCCGTGGTTAAAAAACATTGTTGAAAGGAAA
GATCAAGTCATTGACATCATGATGGGAGCTGTTAATAACTTAAGGGACTCCATGCCAAAG
CTTCAGATCAAGGCCCCCGTACAGCAAGAGGAATACGTACCGAATAGCAAGTCCTGTCTT
CCTGGATATTACACACCAGCTGAACTAAAACCATTCATGGAGAGACCTCCACAAGACCCC
AACAGCCCTGGAGCGGAAGGGAAAGCTTTTAAGAAAGATCAATGGACTCCAGAAGAGACA
AAGCAGAAAGATAAGGGTTATGAAAAGCATTGTTTCAATGCATTTGCCAGTGAGAAGATT
TCCCTTCACAGAGCCCTTGGACCTGACACCAGACCCCCTGAATGCATTGAACAGAAATTT
AAACGTTGCCCCCCACTTCCAACAACCAGCGTAATTATCGTCTTTCATAACGAGGCCTGG
TCTACCCTGCTTCGCACAGTGTATAGCGTGCTACACACATCACCAGCCATCTTACTAAAG
GAAGTCATTCTTGTGGATGATGCCAGTGAGGATGATTACTTGAAGGAACCATTGGATAAC
TATGTGAAGTCCCTACAGATCGTAAAGATAATGAGACAGAGAGAAAGGAAGGGTTTGATC
ACCGCGCGGTTGCTGGGCGCTAGTTTTGCTACCGGAGAGGTGCTGACCTTCCTGGATGCC
CATTGTGAGTGCTTCCATGGGTGGTTGGAACCTCTCTTGTCTAGAATAGCAGAAGATCAC
ACTGCTGTTGTGAGCCCAGATATAACCACTATTGACCTAAACTCCTTTGAGTTTTCCAAA
CCAGTCCAGTACGGCAAGCAGCACAGTCGGGGGAACTTTGACTGGAGTTTGACATTTGGT
TGGGAAACAATCCCAGCGCATGAGAAAGAAAGAAGAAAAGATGAAACATACCCAATCAAG
TCTCCAACGTTTGCCGGTGGTCTTTTTGCTATTTCCAAATCGTACTTTGAGTACATTGGA
TCCTACGATGACCAAATGGAAATTTGGGGAGGAGAGAATGTGGAAATGTCTTTTAGGGTA
TGGTACCTCTAA
>g322
ATGGCCCAGGTATCCAGCAGCAATGGGCTCGGGCACAAGTTATCCGCCTCGCGCGCAAAG
GATGTTGACAAGGAGGAGGCGCTGCAGATGGAAGCTGAAGCGCTCGCCAAACTGCGCAAG
GAGAAGAGAGCCGTTGGAAGCCCGGACAGCGTTCCTTCAAGGATGAAACGGCAACCGCTG
GCTTCGGGCAAACAGGATCTCGACCTCATGGTCTTCCCGGAGTCCGATGCCAAAAAGAGG
GCTGGAAAACCCTTAGAAAACATTGACCTGGAGAAGCTGACCACGGCTGAGCTGGAGAAG
CTCCTGCTGGATGAGAACTTTGAGGAAATTAAACCCCAAAAACCATTAACCATTCCCCCA
CCGCAGGCGTTTAATCCACCCCCGCAGTATTATGTTCAGCCTCCTTTTCCTAGGACCCAC
TGGGGTTCGGGACTCCAGGGACCCATGTCATGCACCTTGCCGCCATCTTTCTCCGTGTCG
TATCACAAAAGCGCAGATCCATTCCTGAATGGATCTGGTCCGAACGTTTCCGTCATACAG
GCCAGAGATCCCGTTTTCTTGGCTCCTCAGGCGCAGTATGTCTCCTACCCCGTGCCTGCA
AGCTCTCCCTTCCATTTAACCAGGAGCTTGCCGGCCTTCTCCAATACGGTCAACCCTGAT
CTGGCCAAGTTGTTGGACAAAATAGCAAGGACTTCCGAATTCGTAAAGAACGGGAAGTCC
GGCCATAATGGCGACTCGGCCCAAGCAGAGACCGCCGTGTCTCCGGTGCAGGCTACAAAT
AAATTGGACGACATCAGCAAATTTGACTGGTTGGATCTTGACCCCCTTAGCAAACCCAAA
GTGGATTCCGTGGAACTGTCGAACCTCATTCCCGACAGCGGGATGGCGTTCGGCGAGCCG
GCCACTGAGGACCCGTGGGATGCCGTACTGATGGAGGAGAAGCCGGTGAAACCCGCTTAC
CCCGACAGAAAGACCATTGCTAAATCCCCGTCCGGTGCCACTGTCACGAGGAGCCACTCT
TTAAACCTCCGAGCAGCTCCCTCGCAGATAACCAGGAGCCACACAATAGAGACGGACAGC
GGCTCCGGGATCCGGACTCCAGCAGGAAATACGGTTTTGCCGGAACTGGAAGCAGAAAAT
GAAGAAGTGACTTCGTTCTGCGAGGAAGTTGCAAAGTTTCCAGAAACAAAGTGCATGAAA
GTGTCATTTGAATCATCCTATGACATCACAGCAAGTTTAAGACCCAATCTGGCCTTTCTG
AGGTTGGGTTCCCCCATCACTAGATTACTAAATAATTCCGCTAATAAAGTTCCTTGCTAT
ATTCCAAAAGTCTTGGAAGTTCTTCGTCATAAACTAAAAGTTCCTCCAAAGTTATCAGAA
ATCGTGGATCCGCGACATATAATCCCTGGAGATTCTGTTACTCTGACCTGTTGCATCTCT
GGATTTAAACCGAGACCTTTAATGATTACATGGCTGAAACGAGACGCCGCCGGCAACGAA
ACAGAACTTCTGAGATGGGATTCCGGTGAAACCGAGGTCCTCGATCCCAAATATTCTCAT
CAACTGAGTGAAAATAAGCATGACGACGGCTCCTACAGCATTGTAAGCTCTCTACTAAGG
CGAAGCATAAAAGAAAATCACGGAGCAAAATACATCTGTCGGGTTTTCCACCCTGCGACC
GGCAGCCGTCAGGAACAATCCAAGGACATGGAGGTCACCGTGCAACAATCATTAATTCAG
AATTCGGTTTTATTTGCTACTTTGGTCCAGATCCGTGGAATCCCAAATTTGGGCTCTCCT
GACACATGGAGTTTCTTTAGTTCTATTAAAAGCCAAAATGTGGTGGCAGCTCCAGGAGGA
CGGGCAGACGCCCCGCAGTACGGTTATGGAGCGAGTTGA
>g300
ATGCTATGTAGCACACAGAGCGTCTCAGAATATCTGAGCACGGCTGAGAGGGAGCTTGGG
GCATTTATAGGGATCACAGGTGTGATGTATGACGTCAAGCCTGAAGATCCAGCCCTAGTA
CTGCCCCTCACACAGTCTCTAGAGGGAGACGGCGTTGGAAGCGCCGCCCCTCTAACAACA
GCCTCCTCAGTGGCACCTCCCACCCTCTCCTGCACACAGACGGCAGAAGAAGGAGGTGCC
AGAGTGGCGTGCAGAAGCGCCACCCCTCTCTTGGAACCCGACGCTGCTCCGTCGCCATCT
TCCCCAGCTCCCCGCGTGGACACGGGGAGTGAAGAAGCAGCCGACCGAGACGCCTCCGGG
ACCAGGGATCCGGGATTTTATCCTTTACAATGCTCTTCAGATTTACTGGAGAAATCCAGA
GCTATTCGGCAAGCTAAAGATGAAAGGACATTTCATATTTTCTATCAACTTGTGGCAGGA
GCAGGAGAACACCTGAAAACCGACTTGCTATTGGAGGCTTTCAGCCAGTATCGCTTTCTA
TCCAATGGCAATATTACCATTCCTGGACAACAAGATAAGGAGATACTACAAGAGACACTG
GAGTCAATGAAAATTATGGGAATCAGCCATGAGGAAATCATGTCAATGTTGAAGATGGTG
TCAGCAGTTTTGCAGTTTGGTAACATTGTTTTTAGAAAGGAGAGAAACACAGACCAAGCT
TCTATGCCAGACAATACAGTGGGGGACGACACGAGGTCCTCGGACGTGATGGCTGCGGTG
GCCTGCACCAAACAAGATATCGACGAGATCAAGGACCTAGTCCGATCCGTCAAGAGAGAC
CTGATGGATCACATCCATAACGAAATAAAAGACCTCAAACACGATCTACATGACATTGGC
ACCCGCACGGATGCCTTTGAAAAAACGCAATCGGTACTCCAGCATGATGGAGGCACTGCT
GAGATGAGTTGGGACGTTAATAGAGTTATTAGTAGCATTTCGTACCCCAACTCCCTAGAA
GTTCGGGAATGGGCACTGCGAAAATCTATTCCACCTAACCAGGCTGTGGCTATATGCAAT
ATACCTCTTGCATTAAAAAGAAAAAGTTTTGATGATGCCATTCGACAGATACAAGGATTA
GAGAATTTTCGTCTAGTACAGACCCGGAAGGATGAAACAGCAGGATTGGCTGTGGCTCTA
GTAAGAGGCTATGGACCTCTGAACAAGGAAGATGGTCCTATGTGTATACAGTTGCCAGGG
ACACATATACCTGGCAGTCCTTTGATTTATGCTTATGAAAATAGCGACGATGACGCTGAA
GTCAACGATGGGGACAATGACAACATTTTCAGCCCCGACTCTGATACCGAAATCCATAGT
GACAGTGAGAGCGGTTGTGAAACTGTAAGGAAGCATCTTAAGCTGCCCACGCGAGACAGA
TCTCGAAAGAAGTATCATACCACCCATGTTACTCAGAAAAATGAGACAAGTCCATCCTTA
ACTGAAGTTCTGGCTCAGCTGTCTAAAAGTGTTGTACAAGCATCTCATGAACAGCACTAC
AGGAAGTTGAAAACCTTTTCCGGTGTTATGCCTGTGCCCACAGGTGAGGAGGATTTCTCT
ACCTGGAAAAGTAATGCAGTCCAGATGTTAGAAGAGTGGACCTGTGTTGAGAATGTTAAA
CGTCAACGAATCATTGAAGGTTTGAAAACTCCAGCATTGGAATTAGTGAGACATCATCTC
TTGCTATACTCTGACTCAACAGCCAATGATATTATCAAGGTGTTGAATGAAGTCTATGGA
GATGATGATACAGAGGATGAACTACGTACTCAGTACTATAATACCATCCAGAAAGAAAAG
GAGAAACTCCCTGCTTATTTGGTTCGCTTAGAGTTGATATTAGGTAAGCTGTTTGAAAAG
AAGATAATTTCTCGAGGTGAAATTGATGCATACAGAAAAAAACAAGTACTTAGAGGGACT
CGATCACAGGATAATAGAGTTATGTCCTTAACTGCTCTATTGCGATCTAGAGGTCCCATT
AGCTTTTCAGATCTAATAAAGGAGGCTAAAGCCATTGAGAAGGAATTCTCCTATGCAGCT
AGCCAAAAGGGAATTGACACCAAAGCCTCTGGAAAGGAAGAACGGAAAACTGAGTTCAAG
GAAAAGAAAGTGGATGCTCAACCCAAAGACTCAGAGAAGACTCCTAGAGCGTGGCCACAG
CCCGAGCCGAGGAGAGAATTTAAGTGTTTCAACTGTGGACAAAAGGGACATCTGCTAAGT
AAATGCCCTCTTAAGGCTGGTTCTGCTAATGTAGAAATCCTAACTATTGAACAGAGTTCT
GCAGAGCTTAAATTTCAGAGGAAGAAGAAGCAAAGGGAAAAGCTACCTAGTAAAAGTAAT
GATGAACTGTCTACAGATATTAGGATAGGCCCAAAGTCTCTCATATCTCTTATGGTTGAA
GGGATTCATGCCTCAGCATTGCTGGACACAGGCTCCCAAGTAACTATAATTTTCCGTCCA
TTCTACGATGAGCATCTAAGCCATTTACCTATTTTGCCAGCAGATGATGTGAAGTTGTGG
GGGTTGAGTTCCCAGGCTTATCCTGTCGAAGGAGTCGTCAAGGTGCAGATTGTGATTCCT
CAGTTGGACACTGGAATGGTGTATCCTATGGATGTTGAAGCCTTAGTGTGTCCAAACCTA
GGTCGGCCTGGTATTCCCATTATACTTGGGACGAACACTCACATGGTTCGAGGTCTGTTG
CAAACCTACCTTAAGGAAGTGGGAGATGTCTATATGAAAAGGATGGAAGAACTAGAACCA
GCCCTGAGACAGGAATGTCATAAATTGGCTCTTGAGACCCAAACTGGACAGTTTCATTAT
TGGGGTCCCCAACCTGTTTCTCTAAAGCCTGGAGAAATGAAGTCTGTTACAGCTGTTGCA
GTCTTGGGAGAAGGTATGTTTTCTGGGGATTGTCAGTTCTGCCTGGAATCCCTTCCTGAG
GAAGACTCCATTAAAGGTTGGACTATTATGCCCGAAGTGAAAGACTGGAGAAGTCAGAAG
ATCGACATATTTGCAGTAACTGTCTTCAATCGATCTGCTACTGATATTTGTATAGATCAC
TGTCAGCAGTTGGGAGTTATCCACCTTCTGGAAGAGATAACCCCTCTTACTATGCTTACA
GTAAATTGTGAAGAAAATTCTTCCAGAGACCTAAAGTTTAATCTGGACGGGTCTCACCTA
TCCCCAGAATGGACAGAGAGACTGTTGAAGGCTCTTAGATCCCGAGAAGGGGCCTTCTCT
ACAGGAGATATGGATGTGGGCTGTGCCAAAAGTGCCCTGCATAGCATTAGACTGAATGAT
CCTGCTCCCTTTCGTGAGAGATCCCGACGAATTGCTCCTCGAGATATTGAAGATGTGAGA
AACATACTTCAAGAAATGGAAGAGGCTGGAATTATTTGTGAGTCCAGAAGTCAGTATGCC
TCTCCCATAGTCGTGGTGAGAAAGAAGAATGGTTCAGTGCGCCTGTGCATTGATTATCGC
ACATTGAACAAGAGAACTATCCCTGATCAGTATACACTGCCAAGGATAGAAGACCTCCTG
AATGCCTTAACTGGGAGCAAGTGGTTTAGTGTCTTGGATCTACGATCTGGATACTATCAA
GTGCCTATGAGAGAAGAAGATCAGCAGAAGACTGCATTCATTTGTCCCTTGGGGTTTTTC
CAATTTACCCGTATGCCACAAGGTGTAACCGGAGCTCCAGCCACTTTCCAACGACTAATG
GAGAAGACATTAGGGGATCTGAATCCAAGGGAGTGTCTGGTCTACTTGGATGACATAATT
GTATTTGGAAAGAATCCCGAAGAGCATGAAAAGCGGCTGCTGAAAGTGTTAGATCGTTTA
CAGGCTGAAGGTCTCAAACTTTCATTAGATAAGTGCAAATTTGCTCAGAATTCAGTGACA
TATGTTGGACACATCGTATCCGCTGAAGGAGTGGCCACAGACCCTGCCAAAATTGAAGCA
GTTGTTAACTGGCCCAAACCAAGTAACATTGAGGAATTGCGTTCTTTCTTGGGATTTTGT
GGCTATTACCGGCGTTTTGTGGAAGGCTACTCCAAGATAGCCCGAAGTCTCCACAATCTT
CTGCAAGTGGAACCTGTTAAAAAGGGACGGAAAATTCTTCACCCCAAAGATCCTATTGGG
GAAAAGTGGACTTCAGAGTGTGAAAAGGCTTTTCAGCTTCTTAAACAGAAGATGACTGAG
GCACCTGTTCTAGCTTATGCTGATCCTGACAAGCCATATGTTTTACACGTGGATGCGAGT
TTGGAAGGACTTGGGGGTGTCCTACACCAACCATATCCTGAAGGGCTTAGGCCAGTGGCC
TATATCAGTCGGAGTTTAACCGGAAGTGAGAAGAATTATCCAGTACATAAATTAGAGTTC
CTTGCCCTTAAGTGGGCTATTGTGGAGAAGTTGCATGATTATTTGTATGGTGTTAAGTTT
GAGGTGCGAACTGACAACAATCCTCTCACTTACATTTTGACTACAGCCAAGTTGGATGCT
ACAGGTCATCGGTGGTTAGCTGCGTTATCCAATTATGAGTTTTCATTGAAATACAAGGCA
GGACCAACGAATGTGGGGGCTGATGCTCTATCTAGACGACCTGGATTGCCTGCAGTGAGA
GATGAAGAGGAGTGGGTTGAGATCCCTGGCCCAGGAGTCAGAGCCCTTTGCCAAACCTCA
ACAGTGGAAAATGAGTGGGTAAATTTCTCAGAGTTGCGGTGTATAGACTCTCTAAGCTGT
ATGCCTGAAGCCATTCCAGAGGCTATGTGCCTTCCAGCCACAATTCCCCTGTGGTCCATG
ATTCGAATAGAGGAAAAGCAAAAAGCCCAGAACCAAGATCCTGTAGTTGGTCGTTTGTTA
AGAGCTGTGAAGACTAATAATCTTAAGCTTTTGAATGATTTACCTGCTGAGCTACAACAA
CAGTTTTAG
>g346
AGCTCCTATCAAATGAGTTGTGGCGAGTATACAGGTACTGCTGGGGATTCGCTTTTGGGG
GGGTTTAACCCTGAAGTTAAATGGTGGGCAAATCACAATGGCATGAAATTCAGCACCCCG
GACAGAGACAATGACAACTATGAAGGAAACTGTGCTGAAGAGGACAAAGGCGGCTGGTGG
TATAACAGGTGTCACTCGGCCAACCTAAATGGTTTGTACTACAAAGGACCCTACACATCT
AATACAGACAATGGGATTGTGTGGTACACATGGCATGGATGGTGGTATTCTCTGAAATCG
GTCACGATGAAGATTAGACCTGCAGAGTTTGAGCCAAATTCCATCTAG
>g345
ATGGGTCCCACCAACGCCATCTCCTTCCTCTTCTGCAAGACCAGGATGGTACTCTTGCTT
GTGATGGGAGTCATGCTGCTCGGACTGGCCGCCATTTACTTCGTCGATAGCTCGCACTAC
GGTCCTCGATATAAGACGTCTGTCGAGAATCTGCTAAGGTGTCTGCCGTCCAAGAAGCAA
GACGAGGACAAAAACCAGGAAAGGTCTTCAGCGGCGGCGGAGATGACCACCCAGCGGTCG
GATGTGAGGGTCTGCCCGGCGCTGTCCCCTTATCTGAAAGGTGTCGTGCCGCTCTCCTTC
GAACCCTCGCTGACTTTGGAGAAAGTGACGAGCAAAAATCCGGAGGTGGAAAATGGCCGC
TTCCGCCCCAAAAACTGCCAGCCGCAGCAGAAGGTGGCCATCCTGATCCCGCACAGAAAC
CGCGAGCGGCACCTCCTCTACCTGCTGGAGAACCTGCACCCGTTCCTGCAGAGACAGCAG
CTGGACTACGGAATATACGCCGGGAACATGAAATTCAACCGCGCCAAGCTGCTGAACGTT
GGCTTCCTCGAGGCGTTGAAGGAAGAGACGTGGGATTGCTTCATATTCCACGATGTCGAC
CTTCTGCCTGAGGATGACTTCAACCTTTACCTGTGTGACAGCGAGCCCAAGCACCTGGTG
GTCGGCAGGAACGCCACCGGCTACAGGCTGCGGTATCCGGGATATTTCGGCGGTGTGACC
GCCATGACTCGGGGCCAGTTTGCCAAGGTGAACGGCTACTCCAACAACTACTGGGGCTGG
GGCGGAGAGGACGATGACCTGAGGTACAGGGTCGAGCTGCAGAACATGAAAGTGGTCCGT
CCCGCACCGCAAGTAGCCAAATACACCATGATATTCCACACGAGGGACAGCGGCAACGAA
GTCAACGGTCAGAGGATGCAGCTGCTGAATAAAGTCTCCAAAGTCTGGAAGTCAGATGGA
CTGAATTCCTGCTCGTACCGAGCGCTGTCCGTGGAACACAACCCCATGTACATCAACATC
ACTGTGGATATCGGAGGTCCCCGTTAG
>g350
ATGGATGGCGTCTGTGAACCAAAGCAGAAGATGACCAAGGAGGAGAAGAAACTAATTAAA
AAGCAGGCAAAGGTCAAGCATATATTGCTGAGACATGAAGGGGTTGAAACGGTGTCCCAC
CCTTCAAAGAGCCTTGTGATTGCCAATGGAGGACTTGGGAATGGAGCGGACAGACAGCAG
CTGCTCAGTGTCCTGGAGCAATGTGGAAAGGTGGAATCTTTAGTGATGCCCCCCAACAAG
CCGTATGCATTTGTTACTTACACCTCTATGCAAGAGGCTGTGAATGCATATAGTTCATTA
AGTGGTCAAGATATACCATCATCTGACTCGGATGGGAAAATAACTCTGTACTTCAGCTTT
GTGGAAAAGGTGGAAATAAAAGAGGCTTTACCACCATCATTGCCCCCTGGTCTGGTAGTG
GTAGAAGACTTTGTAACACCGGAAGAAGAAGCTTCTATGTTAGTAAGCATCAGTTGGGAA
ACTGAGAGGTCTAGTCAAAAGTCACTAAAACACAGACGGGTGAAACATTATGGGTATGAG
TTCCGATACGACAACAACAATGTAGACAAAGATCAGCCTTTGCCTGGAGGTCTCCCTGAG
TTTTGTACTCCTGTGCTGAATAGATGCTGGCAGCAAAAACTGATAAAACATAAACCCGAT
CAGCTGACGATTAATCAGTACGAGCCGGGGCAGGGAATCCCTCCACATATTGACACCCAT
TCTGCTTTTGAAGATGAGATTATCTCTCTCAGTTTGGGAGCACAG
>g310
ATGTCCAGTTCGGGGTATCCTAATCAAGGTGCTTTCAGCACGGAGCAGAGCCGCTACTCG
TCTCATCCGGTGCAATACAGCTTCTCCAGCGGCCGGCACCAGCAGGAGTTTTCTATTCCT
GAATATCGGTCTTCTCACCTGGAGTCATCTCAGCTCAGAAGGCGGCCTTCTTTGTTATCA
GAATTTCACCCTGGTTCAGACAGGCCTCAAGACAGGAGAACGGGATATGAACAACAATAC
CATTCCCTTCAGCAGAATGACCATGAGGGGCTGGAGTCCAAGCGGCCGCGGCTAGATCCG
GTTACTGAGTCCCACTATAGAGTTAATGCTGCTACATTGATGCCCTTGGTACCGACCATC
CAAGAGGGTCTTCGGTCACAGGGGGATGTGAAAAAGGAACAGGGTTTATCCAGCAAGCAT
GAGGTATCCACCTCCCCCATGTCTGGGCAGCCTGGTGACGACCAGGATGGCTCTCCTTCA
AAACTTTCAAAGGAAGAATTGATTCAAAGCATGGACCGCGTGGATCGAGAGATCGCAAAG
GTGGAACAGCAGATCTTTAAGCTGAAGAAAAAGCAGCAACAGCTTGAAGAAGAAGCAGCC
AAACCTCCGGAGCCCGAGAAGCCCGTCTCCCCTCCACCTGTGGAGCAGAAGCATCGCAGC
ATCGTCCAAATCATCTATGATGAAAACCGGAAAAAAGCGGAAGAAGCCCATAAGATCTTG
GAGGGCTTAGGTCCTAAAGTAGAGCTACCACTTTATAACCAGCCCTCGGACACAAAGATT
TATCATGAGAACATCAAAACAAATCAGGTGATGAGGAAGAAACTTATTTTGTTTTTCAAG
AGAAGAAATCATGCAAGAAAACAAAGAGAACAAAACATTTGTCAGCGTTACGATCAGCTG
ATGGAGGCCTGGGAGAAGAAGGTAGACCGGATAGAAAATAACCCTCGACGGAAAGCGAAG
GAGAGTAAGACCAGAGAGTATTATGAAAAGCAGTTTCCTGAAATCCGGAAGCAGCGAGAG
CAGCAGGAACGGTTTCAGAGGGTTGGGCAAAGGGGAGCCGGACTTTCTGCGACTATTGCA
AGAAGTGAACATGAGATATCTGAAATCATTGATGGGCTGTCTGAGCAGGAGAACAATGAA
AAGCAAATGCGCCAGCTCTCTGTCATACCACCCATGATGTTTGATGCTGAACAAAGAAGG
GTGAAGTTTATTAATATGAATGGCTTGATGGAGGATCCCATGAAAGTGTACAAAAACAGG
CAATTTATGAATGTCTGGACTGACCACGAAAAGGAGATTTTTAAAGAGAAATTTGTTCAA
CATCCAAAGAACTTTGGCCTGATTGCTTCCTATCTGGAAAGGAAGTGTGTTGCGGACTGT
GTCTTGTATTATTATTTGACTAAGAAAAATGAAAACTATAAAGCCCTTGTTCGAAGAAAT
TATGGAAAACGGAGGGGACGGAACCAGCAACAAATTACACGCCCTTCCCAAGAAGAAAAA
GAAGTCGAAAAAGTCGAAGAGGAGAAGTCTGACAAAAATGAGAAGAAAGATGATGAACGG
AGGGATGAGGATGAAAAAGAGGATAAAGAGGAGTTTAGGGAGAGCACCAAAGACAAAATG
GAAGTCGCAGCAGAAGAAATGGAAGAGAGGGAGCAGTCCACACCTAGAGGTCGTAAAACT
GCTAATAGCCAAGGCCGACGGAAAGGAAGAATTACAAGATCAATGGCAAATGAAGCTGCT
GCGAATGCTACACCTAACAGCACCACAACGAGCACCACCAGCTCAACACCTGCGTCCGCC
ACCCCGGCACCGGTAACAGTAGCGCCTCCTCCAGAAGAACCACCGCCTCCACCACCCCCT
TCACAACAGGAGTCAACTTCGGCAGAGACCGTGGAGACCTCCCGCTGGACCGAAGAAGAA
ATGGAAGTTGCTAAAAAAGGCTTGGTGGAGCATGGTCGCAACTGGGGGGCAATTGCCAAG
ATGGTGGGAACAAAAAGTGAATCCCAGTGTAAAAATTTCTACTTCAATTATAAAAGACGC
CACAATCTTGACAACCTGCTCCAGGAGCACAAGCAGAAATCCTCCCGGAGACCGCGAGAG
GAACGTGATGTATCGCAGTGCGAGAGCATGGCTTCTACCGTGTCTGCACAGGAGGACGAG
GAAAATGAAGGGTCTAATGATGAGGAGAACCCTGACGACAGTGAAGGTGCTGAAAACAGT
TCAGATACTGAAAGCGCACCATCTCCTTCACCTGTCGAAGGAGCCAAACACCCTGATGAT
GTGCCAGAAAGAACCACTGCTATATTAAAGGCAGATGCTTGTCAGATTCAAGAGCCTGTC
TGCAAACCTGTCCCCAGTGCATCCCCCTCCACTACAGCTCATAATGCTAAAACCACAGAA
ATCCAGTACCCCGATCTGCAAGTGAAAGTGGAAATAAACACTGAACCTGAAGAGGCTATG
GAACTGGATGAGAGGAGCCAGACTTTGGAAACTAAACCCAGTCCAAATCTCCACATACAT
ACCAAAGCTGAACCCATAGAGGTCGAATCAAAGGTAGCAGACAATGGCCAAGTGAAAGTA
GAGGATGATGCCAAAGACACCAGAGATATGGACAGGCTTAAAGAGAAGGTTGATGGTGTA
GACATGGAATATGTATCAGTCCAGTTCCCTACTCACACGAGACCTGAATCACAGTCAGAT
AATGACTCTAGTGCGACATGTAGTGCTGACGAGGAGGTAGATGGGGAACCCGACAGGCAA
AGAACTTATTCAATTGAATCAAAACCGTCCTTGTTGAATCCTGCTGGAACTGTTCTAATC
CCCCCTACCATGAAACAAGGACCAATGGATCTCCAGCAGTTACACCATCGTGCTGCTGTC
ATACCACCTATGGTGTCTTGTAGTCCATGTAATATACCCCCTGGAACAACTGTCCCAGCA
AGCAGCTATTCCTTATACCAGCGGCATCTTCAATCTCTACATGAAAACACTTTGCTAGAG
GAGCAGAGGCTTAGACACGAACAGCTTAATTTGGATATCAGGAGATCAGCCAGTCCGGGA
AACAGGTCCAAGAGTCCAAATGTCGAATGGGAAGGGAAATCTGTCTATATGCCGTATGCT
GCTGAAGTTAAGCGTGCACTGGAGCATGAAGCACAAATGCAAAACGCTGCAAGATCTGTT
TCACCGTACCGGCTGTCTCCGAGAGATGTCAGCAAAGCCTCCTCTCAAGCGGATATTAAT
CCTGTTCGCTACTGTGTCCCTCCAGTCCTACAGCCTGCTCCGCATCAGGTTATAACTTCC
ATGTCCGAAGGATCTCGCCTCGCTGTGACGCGCCCAACCCGCCCACCACCCCCACTTATT
CCATCAGCAAAAACATCAGCAAACCCCTCTGACAAGCCATCGTTCATTGTGGGGGGCTCT
ATATCACAGGGAACACCTGGAACGTATTTAACTTCTCTCAGCCAGCAGCCCTACGGCCAA
GACCCAGCGAAGTCCTCTGTGGGCCCCCTCGGACTGCCGAGGCAACAGGAATCTGCCAAA
GCTGGGTCTGTGACTTACATTAAACAGGAGGAGTTTTCTCCCAGAGGCCAGAGCTCCCAA
CCAGAGGGTCTCCTGGTCAGGGCACAGCATGAAGGTGTTGTCAGAGGTACTATATCTGCA
CTTCAGGAGGGGAGCATCACTAGAGGCACCCCAGCGGCCAAACTTCCCATGGAAACCATT
TCCACTCTACGAGGATCTATTACTCAGGGTACACCAGCTCTGTCACAGTCTGGTATTGCT
GCTGACGTCTTGCTAAAGACAACCATCACCAGATTGGCAACAGAAGACATCAACAGTCCA
GAAAAATGCAGAGAAGAATCCTCTGCTAAAGGCCACGTGATCTATGAAGGAAAGAGTGGG
CACATTGTATCATATGACACTGCCATGAAGAATATCCGTGATGGCACAAGGAGTCCAAGG
ACAGTTTCAGAGGCAACGCTAAAAAGAACATATGATGCAATGGAAGGAAACATAAAGCAG
AACATTTCTGTAAGGGAATCTGCTATATCAACACCTATGGAAGGACTAATATGTCGTACA
TTACCAAAGGGAAGCACACATGCAGAGCTCAAAGACAGGGCGCTCTTGACTGGGTCAATC
ATGCAAGGTACCCCTAGGGCAACAGCTGAAAACTATGAGGAAGGTCTTAAGTATGCAAAG
CAAATAAAACGTGAAAGTCCTTCCATTAGGCCTTATGAAGGAGCCATCACCAAGGGCAAA
CCTTATGAAGGAGTCACCACAATCAAAGAGATGGGCCGGTCCATTCATGAAATCCCTAGA
CAGGATCTCATCGGCCAGGAACATAGAAAAACTCCTGAAAGTTCAAGAACGATAATGGAA
GGTTCCATATCACAGGGCACACCAATAAAATATGAGAGCGCTTCTGGTCAGTCTGCTATT
AAACACAATGTGAAGTCATTGATAACAGGTCCTAGCAACCTTTCTCGCGGCGTATCTCAG
ATGGATATTATGCCAGAGAATTTAAAGATGGTGGAACGCTCAAAATACGAAGACGCTAAG
TCATCAGATTCCATCCGGTCACGTCACACGTCCGTTGTAAGCTCTGGCACATCTGTACTC
AGATCCACTCTCCACGAATCTTCAAAATCTCAGCTGAGCCCTGGGATTTATGAGGATTCC
AATGCAAGAAGGACACCTGTCAACTACCCTAGTCCAATGTCCAGAAGTTCACCGATGGCA
CGTTCTACAGAAGGTGGGCATACGCCAGGGAAGTCTTCCAGTCATGAAAGAAAAAGCACT
TTGACACCCACTCAAAGAGAGAGTATTGTAGTGAAGTCCCCGGTCCCAGGTGTGGACCCA
TCAGCAGCACACAGTCCTTTTGACCCTCACCTCCGAGGTGGAACACCTGGTGAAGTTTAT
AGAGCCCACCTGCCACCACATCTGGATCCTGCTTTACAGTTCCACAGGGCCTTGGATCCA
GCTGCAGCAGCTTACTTGTTCCAAAGGCAGCTGTCACCCACTCCTGGTTATCCAAGCCAG
TACCAGTTGTATGCTATGGAGAACACGCGCCAGACCATCTTAAATGACTACATCACTTCC
CAGCAAATGCAGGTTAATTTGAGACCAGACATTGGCAGAGGACTTTCACCCAGAGACCAG
GCACTGACAATTCCGTACCCAGGACCAAGAGGTATTATCGACCTAACAAACATGCCTCCT
ACAATCCTGGTCCCTCATCCTGGAGGAACAAGCACTCCACCAATGGACAGAATCACATAC
TTACCTGGAACGCAACTTGCTTTCCCTCCCAGGCCTTACAATCCAGCTTCCTTGTCTCCA
GTGACAGATCAGCCTGGCAGGCCGAGTAGCCATGGCTATGTGCGTTCCCCCTCGCCCTCT
GTCAGAGGACAGGAGAGCATAATACAGCAGCGTCCCAGCATATTCCAAGGAACAAATGGC
AAAAGCGTCATTACGCAGCTGGATCCTTCTCAGCTGCGGTCTATTTCTCACACTTCGGGA
ACACCCTCCATTACCCAGGGAACATCCAACTCCCATTACAACACGGCTGCCGATGCACTT
GCAGCCCTGGTGGATGCGGCTGCTTCGGCTCCACAGATGGAGGTTGCCAAGCCAAAGGAG
AGCAAACATGAGTCCATGAGGTCCCAAGAGAACATGGTCAGACGCGCAGCACTGGAACAA
CAGCAGCAGCAGCAACAGCAACAAATGGAGTCTGAGCGGAGAATGGTGCAAAGCCCGTAT
ACTTCCAGCTTTTCCAGCAGCAAGCCACAGAGCCAAGCTTCCCCGGCTGTCTATTCTGAA
GCAGGCAAAGACAAACCCGCTCACACCAAATTACGATATGTGGAGGAGTTAATGACAAGA
GGAAAGACAACTATCACAGCAGCCAATTTTATTGATGTGATCATCACTCAACAGATTGCC
TCTGATAAAGATGCTCGAGAGAGAAGTACACAGAGCTCCGATTCAGCCAGCAGCTTGTCT
TCCCATCGCTATGAAGCTCCAAGAGACACAATAGAGGTGATCAGCCCAGCAAACTCACCT
GTGCCAGTTAAGGAAAAAGAATCCTATCCCCAGGAGATTCCTAAATCAAGCCAGCCTGAA
AGTGAAAGTTCAAGACAATATGAAGGACAAGCTGGTCGGTACCGAACGCAGCAAGAGTCT
CCATCTCCGCAGCAGCCGGCACATGTTCCCCAAACTCATAGGCTGATTACACTAGCTGAT
CACATCTGTCATATTATCACTCAAGACTTTGCTAGAAATCAGTCTGCTACACAGACGTCA
CAGCAGCCGCCCACATCGACATTCCAGAACAGTGCCCCCTCCCCCGCTCCCATCCGATCC
AAGCCATCCAACAGATTCAGCCCTGAAACACAGGTCCAGTCTGTGCACCATCAGCGACCT
GCCTCAAGGGTGTCACCCGAAAACATACCTGAAAAGCCCAGGGGAAGGCCTGGAAAGTCC
CCAGATAGAGGGCATGTCACCGAGCCATATGAGCCCATATCACCCCCACAAGCCCCGATT
ATACATACAAAGCAAGACAATATGTTATTACTGTCCCAAAGACCAGAACCTGCTGAGCAG
AGGAATGACTCGCGCTCTCCTGGAAATATTAATTACCTCCCCGCCTTCTTCACCAAATTG
GAAAACACCTCACCGATGGTGATGTTTAAGAAGCAAGAGATTTTTCGTAAGTTAAACTCT
TCTGGTGGCGGTGACTCTGACATGGCACCTGCTCAGCCAGGAACAGAGATATTTAACCTG
CCGGCAGTCACTACTTCAGGTAAGATTGAGTTCTCTCAATTCTCTCAAATCTGTGATTAG
>g356
CGATTTCTTCAGGACGTGTCTCCCTACATTCGGAAAGCATCACTGATCGGTGACCTGCCG
TGGGACAGCCTCGATGTCCGCAGTCCAGCACACAGCGACAATTCAGGGTCTCCCAAGCAC
AACTCCAGAGACTGCAAGGTCATCCCCTTAAAAATGTGTTACGCTGCACGAAATCTGAGC
ATGTGCGACCCTGAGGGACGTTTGGTGGAGCTGCGGTCTCCAGATGGCTGCCATTCCATT
ATCCTTCGCTGCAGGGATTCGGCTTCTGCCCTCTCCTGGTCGCAGGCTCTGCACAGTAAC
ATCACTGCGCTGCTGCCACAAGTGCTAGCGGAGACACAGCGCATGCTGGGGACTACGAGC
GAGGACCTCAGGAACCTGGGCTGGGTTGCAGAACAGGTTTCCCAAGATGATGGGCGCTCT
CTCTGGCATCCAGTTCTCATTGCCGTCTCGCAGAAGGACTTTTTGCTCTTTGATTCAATG
CCAAGGACTCGAGAGGAATGGGAGAGTCCCAGACACAGGCTGCCACTGATTTACACCAGG
TTGGTACATTCTGGTCCTGGACACAGCTCGCCTTCCATGGGGTCTCATCTCACATTTGGC
ACTCGGACAGGCTCCACTCAGGGTATAGATATACATGTGTTCCGAGTGGAGACTCAGAGA
GATCTGTCAGCCTGGACGAGAGCTTTGGTGCAAGGATGTCATGCTTCAGCTGAGCTCACC
AGAGAGGTGACCATCGGCTGTATTCTGCGAGGAGAAGAAGTCTCACTCTCTATACACTAT
GATACTGGATTTACAGTCCACCGTGGTGGGCCCTCAGGACCAGTAATGTACAGATACCCC
TTTGAGAAGCTCAGGATGTCAGCAGACGATGGGAACAGAAACCTTTATCTGGATTTTGGA
GGACCAGAGGGAGAGCTGGCCCTGGATTTGCACACATGTCCGAAGCCTGTTGTGTTCCTG
TTACACACATTCCTTTCTGCTAAAGTCACACGCAGGGGTCTGCTGGCCTGA
>g353
ATGGAAGAAACTTGTTCACTTGATCTTGAATTATTGGCTGAAAACCCTTTGAATGTTTTT
CATATTAAAATTGACATTCAGGATATTAATGACAATGCCCCTAGTTTTCCTAAGGACATA
CTTGATGTGCCAATAAGTGAATTAGCTGTACCAGGAACACATTTTGCTCTGGTAAAAGCA
CATGACCCAGATCTTGGTTTGAATTCTTTACAGAGCTATACTCTTTTCCCCAACCAGCAT
TTCAAGCTAAGAGATAAAAACAGCACAGAAGGAAATAAATACCCAGAACTTGTGCTAGAA
CAGGCTCTAGATCGAGAAACACAAAAATCCTATGAACTAATTTTAACTGCATTTGATGGT
GGCAAACCTGTAAAAACTGGAACAGTAATAATTAAGATTGTGGTTCAGGATGTGAATGAT
AATTATCCAGTGTTCAGTCAAGATAACTATAGGATCAGTTTGAATGAAAATGTACCGGAA
GGTTTCCTAGTTCTTCATCTAACAGCTACTGATGAGGACGAAGGTTCTAATGCACAAATA
ACATATTCATTCAGTCATATTCCCGAAAGCATGCAAGATATTTTTAGTTTAGACCTTACA
AGTGGTGACATTAAAACAATTGGTCCATTGGACTATGAGACAACGCAGAATTATGAAATT
GTTGTGGAAGCTAAAGATGGCGGTGGTCTAGTGAGCCATTGTACTATATTCATACAGATT
GTAGATGTCAATGACAATGCACCTGAGATAGTGCTAGCTTCGCTGTCTACACCAGTTCCA
GAGGATTCCTTGCCTGGAACACTCATTGCTCTTATTCATGTCAATGATCAAGATTCAGGA
AGAAATGGTGAAGTGACATGTGAAATTATTGAAACTTTCTTGTTTAAGTTACTGCCAACA
TCCTCTGGCTATTATAAACTTATAACATTAAATGTTCTAGACAGAGAAACAATTTCAGCA
TATAACATTACAATCATAGCTACGGATGGAGGCTCTCTAACAATGATAACCACAAAAAGT
ATTCAAGTGACTGTATCTGATGTGAATGATAATCCACCAGTTTTTGACAATTTCGATTAT
GTTGCATATGTTATAGAACATAATGTACCAGGAACCCCAATACACACTGTGCATGCATCA
GATCTTGATACTGGTGAGAATGCTCAAATAGTTTATTCGGCACTCAATACAAATATTGAA
GGAATCCCGGTATCATCATATGTTTCCATCAACTCAGAAACAGGAATTGTTTATGCCCAG
AGGTCATTTGACTATGAGCAACTGCAAGAAATAAAGTTTGAAGTAATGGCTAAAGACAGA
GGATCTCCTCCTTTAAGCAGTAAGGTCACTGTGAGAATATGTATTGTTGATAAAAATGAC
AATGCTCCCAAAATTCTCTACCCATCACAAGATACTGAAGGAACAACTGTGTTTGAATTT
ATCCCCCACTCTTCAGAGAAAGGTTATTTAGTAACCAAAGTGATTGCTGTGGATGCTGAC
TCTGGACACAATGCATGGCTCTCCTACCACTTATTAGAGGTTCCTGGCTCATCGTTCTTT
GTCATCGGTCAACAAACAGGCGAAATTAGACTAGCACAGGATTTGCAAGACATAGATTCT
TTAAAGCAAAAGGTTGTTGTTATGGTGAAAGACAATGGGATCCCTTCTTTATCTGCAACG
GTGACTTTCAATATGGTGGTGGCAGAAAACTTTCAACAGGTTTTTCCAGAAATAATCAAA
GAACCCAGTAGCATGGATACATCATCTAATGTCACCTTCTATTTGTTCAGTGATGGATCG
TTACCTCTGCCATACTCATATGATGTTTGTGTAACTCTTGACTCAAGACAAAATGAAATT
GCTTATCTGAGACCCATCCAGAACGTTCCTACGGACAATCTGATTGATACGGAGGATCCA
GCAGCTTTAAATGATTCTGCAAAAGACAGTGTTCCTTCAACTAGTCAGAACCAG
>g355
ATGGAGAGCATACGGCCTGCCGCTGCTCTGAGGAGCATCTTCCTGCTGCTTGCCTTCTGC
CATACTACTCTGCAAGGAGGTGTTGGTGGCCTCGGAGCTGGTGGCGTGGGTGCTGGAGGC
TATGGTGCAGGTGGTCTTGGAACTGGTGTCTATGGTGCTGGTGGCGTAGGAGCTGGTGGC
GTAGGAGCTGGTGCAAAGCCTCCAAAACCAGGTTATGGAGGCCTCGGAACTGGTGTAGGT
GGTGTTGGTGGTGTTGGTGGTGTTGGACCTGGTTACGGAGGCCTTGGAACTGGTGTTGGT
GGTGTCGGAGGAGTTGGTGGTGCAGGAGTTCAAGGAGTCAAACCAGGAAAATTGCCAGGT
GGAGTTGCTGGTGGATATCCTGGTGGTCTTGTACCAGGTGGAGTTCCCGGCGGAGTTCCC
GGTGGAGTTCCCGGCGGAGTTCCCGGTGGAGTTCCTGGTGGATTTCCTGGTGGTCTGGTA
CCAGGTGCTGGTGGAGTTATTCCAGGAGTGACCACAGGAGTAGTAGTTCCACAGACTGGT
GTCCAGCCAGGGGCAGGAGGAAAGCCAGGAAAACTGCCAGGTGCGGGAATTCCCGGGGTC
TTCCCTGGAGGAGTGTTACCAGGAACAGGAGTACGATACCCTGGAGTTGGTGTTCTTCCT
GGTGTGCCAACAGGAACCGGAGTGAAACAGAAAGCGCCAGGTGGTGGCCTGTTAAGTGGA
ATTCCAGGATTTGGTGGATATGGTGGCCAGCAACCAGGCGTCCCTCTTGGATATCCTATA
AAAGCACCCAAACTTCCAGGAGGATATGGGCTTCCATACACATCAGGAAAACCTGGAGGA
TATGGCGGTTATGGTCAGGCTGGTTTGGGAGCTGGTGGAAAAGCTGGATACCCAACAGGA
ACCGGGGCTGGAGGCCTGCCTGGGGCTGTACCTGGAACCGGAGTTGTACCTGGAGGTGTC
CCTGGTTTAACTCCTGGAGGTGGTGCTGTTCCTGGTGTTGTGCCTGGTTTATATCCTGGA
ACTGGTGTTCTACCAGGAGGTGGTGCAGTGCCAGGAGCAGGTATACCCCAAGTTGGAGTC
CAGCCAGGTGGTAAACCACCTAAATATGGTGTCCCAGGCGGTGTGCCGGGAGGCGTACCA
GGTGTAGGAGGTGTTCCTGGAGTGAGTGGTGTCCCAGGTGTTGGAGGCATTCCCGGAGTT
GGTGTTGGTGGTAAAGACCGATAA
>g359
ATGATCCGTCTGGGGAGCAGGCGCAATTCTTCAATAAGTTACAAGCCGACAGGGGCAGAT
GTGCCGCTGGCCGCCCGCAGCTGGGGGTCCCTCAGCCGTCCGGACCCTTTCTGCTTGCTG
GGCATTGTGGCAGATGTTAGGAAAGCACTGGACGATTTGCAAGAAGTGTTAAGAAACTTT
GAGTCCCGGGTGGAATTCACCAAAGACCTGCAGAGAATGAGCGGCGAAGACGGGGATTAT
TTCGATATTCGAGAAGAAGCTGGAGCAGAGACGGTAGTAACAAAAGGTAAACAGAGAACT
GCGCACAAACCTCACTCAAAACCAAAGATAGGAGACACTCTAGACCCCGACCTTCATGCA
GGAGAACGTGTTCTAGACAATGCAGAGTTATGGGCCAGGCTGGAGGAACTGGAGAAGGAA
GAGGAACTTCAAGGAGAACTCAACGAGACGGAGGAGACATTCAGGGTTAAGAGCGACTTG
TGTTCCGAAGAAGACAAAGAGAATCAGAAAACAGACCTCAATGTGGAGTTGAAAGGCTTG
CATACTCAGGGCAGACTTACAAAAGCAGAACGCATACTGAGCAGCCGTCACGTCAACGGC
TCGACTTCCCACCACAGCGACGACGACGACCCTGGGAGCAGTAAAAACGCGGTGGCCACC
ATACACTTCCAACACACCGTGGAACCAAAAAGGGTCAGAATAAACACTGGAAAAAATACA
ACTTTGAAATACAGTGAAAAGAAGGAGGAGGCCAAACGGAAACGGAAAAACAGCTCTGGA
AACGGCCACGCTGCCCCAGAACTACCGGTCATCAAGACACCAGCAGATATATACAGGGCG
TTTGTTGATCTTGTAAACGGGGAGTACGTACCCCGAAAATCCATCATGAAGTCTCGGAGC
CGAGAAAACAGCGTATGTAGCGATACCAGCGAGAGCAGCGCACCGGAGTTCGAGGAACGG
AGGTCCTACCAAAGGAACTGTAGCTTCGATGAAAGCCCGTTCAGTGACCATGGCGACAGC
ACCCAGGACCGCGACGACCGAGGGCAGAAGAAGCTTTCTCCTGTGTTTGGACCCTTGGAG
GCTTTTTCAGGAACCGTGGTGGAAAAGGAGCCTTTCTCCTTCTCAGTACCGGTCACAAGC
ATTGCCCACCCGGCACTGCCCACTATCCCGGAGCGCAATTCCGAAGAGCCGTCTTGTGAC
ACCCCCGCCGAAAACACAAAACGGGTTTCCAAATTCAAAGCCACCAGAATACAACAGAAA
AAATAG
>g365
ATGAGTTTACACATCTCATTTCAGGATGAAAGTGGACAAATTGTTGCATCTGGACTTATT
GAGATTTTTTGGGGTGTTCAACGGCCAATCAGATTCAAAATGCAAGATGAGAAATTTCTC
TCCTCTGAATCGATTCAGCTGCCAGAGGTTATTGGTTCCAGTATGACAAAAAGTGGAATG
ATGCGCTGGGGGGAATTTGATGACCTTTACCGCATTACAGAAATAGAGGAGCAAACACGG
CATTCAGATGAAGAAATGGATGATAACAAGGACTACAGAAGTTATGATTTTGACAGCAGC
ACGCTGAAGCCTTCCTTCAATGATAATGCTCCCGACTCGCCATCATTGTACAGAACTATG
AGTGATGCTGCCCTGGTAAAAAGGAGGGTTAAACCCAACACACCTGACAGAGAACATCTA
CAGCAACATAGGTTTTCCATTAACGGACACTTTTACAACTATAAGACCTCAATTTTTACT
CCAGCTTTTGGATCGGAAACAAAAGTTATGATAAGCAGCAATATGACAACAAAAGAAGTA
ATTGAACAACTATTACACAAGTTCAAGGTAGCACAATACATTAAATTTAGCCTACCCCTT
CTGCAATCAATTCTGAAAAGGTTAAACGAAGAAGAGGAAAGGGAAATTAAGAGAACTATT
GATAAGTATGTCAAAGAAAAGTCTATATTGCTACAGCATCTTAACAGCAGAATTACAAAA
AGGACAGAAACTACAGTATAA
>g370
ATGGATGTGTCAACCATCGTAAGAGCTCAACGTTTCTATAAGTGGCAGTTTACAGAAGAA
AAGGCTACCCTATACCAAATGTTTGATTTGATTCATCTGGCCTGGAAATGGCTCAGATCG
GAGTGCCAAAGTCCTGTACAGATAGTAGAAATTCTGGTACTGTACCAATATCTGAGAGGA
CTTTCGCGGATTCTCTGTGAATGGGTCAGTCAGGGAAACTCCACAACCTATGATGACATG
GAAGCCCAGGTGGAATGGTATATAGCTGCCAAAAGCCTTGATAAGCCACTGAAGGTGATT
CCAAGAAGAGGGACAGTGAGCCCACCTAACCAAATGAGCGAGGCTGGACAAAAGCCCCAA
GGACCCATACCTCGCTTAGATCACGCTGCAACCCCACTAAGATCTGGAAAGCCATTGCAA
GGCCTAAACTATAATAACAGGGGTCCTGTGAGTGGGGCTGAAACTCTCCCACTGCCATGG
TTGAAGTTACTACAGGAAAAAGGGTAG
>g368
ATGTTCAGATTGTGTATGTGTTCGCTGATATTTGTGATTATCCCCCAGGACTTCCAGTTT
ATCCTTAAAGGTCTGGCACGGCTGTTGCTTAATCCCCTTACTCAAACATACTTGCCGAAT
TCTACAAAAAAAATTCAGTTTCACCAAGAATTGCTGGTCTTGTTTTGGAAATTATGTGAC
TTCAACAAGAAGTTCCTATTCTTTGTCTTGAAGAGCAGTGATGTCCTGGATGTCCTGGTC
CCAATACTGTATTTCCTGAATGATGCACGAGCGGATCAGTCCCGTGTAGGTCTCATGCAC
ATTGGAGTTTTTATCCTTCTGCTGCTTAGTGGAGAGAGGAATTTTGGCGTCCGTTTGAAC
AAACCCTATTCAGTGCGAGTTCCGATGGATATCCCAGTGTTTACAGGCACTCACGCTGAT
CTTCTTATTGTGGTGTTTCACAAGATTATTACTAGTGGACATCAGCGTTTGCAGCCTCTG
TATGACTGTCTCCTCACCATCGTGGTTAATGTGTCACCATACCTGAAGTCCCTTTCCATG
GTGGCCTCTAACAAGCTCCTTCACCTGCTTGAAGCTTTTTCCAGCCCTTGGTTCCTTTTC
TCCTCTCCACAGAACCATCATCTAGTCTTCTTTTTGCTTGAAGTTTTCAACAACATTATC
CAGTACCAATTTGATGGTAATTCTAGTCTGGTGTATGCCATTATTCGTAAGCGTAATGTG
TTTCATCAGTTGGCGAACCTCCCTTCAGATAATTCTTCCATACAGCGTGCCCTCCAGCGA
AAGAAAAAACCATCAGAGCCAATTTCACGCACAAACTCTCAAGATGGGGCATCTATGGAA
GGCTCACGTCCTGCTGCCCCAGCAGAACCAGGCACACTCAAGACCAGCCTAATAGCCACT
CCAGGTAAGAAGCAATGGTGA
>g381
ATGACTGATGCAGTTCTAGGACGTGTTTATCAACAATCTGACCTGGAAGTACTAGCTAAA
GAAGCAACAATCCCGATAGTCAATGGTTTATCTGATTCCTACCATCCTATCCAGATACTT
GCTGATTACCTCACTATACAGGAACATTATGGCCATTTGAAAGGACTGACTATATCCTGG
ATCGGGGATGGAAATAATATACTACATTCAATCATGCTGAGCGCTGCCAAATGTGGAATG
CACCTGCGTATCGCAACACCAAAGGGTTATGAAGCTGATCCTCTAGTAACTGCAACAGCA
GAGCAGTTTTCCCATGAGTTTGGTACCAAACTGTTTTTCACAAATGATCCCCTGGAAGCT
GCACATGGAGCCAATGTTTTGGTTACAGACACGTGGGTAAGTATGGGACAAGAAGCGGAG
AAAAAGAAGCGGCTGGTGGATTTCAAGGGATACCAGATCACAATGGAGTTTGCTTTCACC
AACAGAGTACCATGGGGTATTAATACCTCAGTGGTTCTAAAATTGCTGTTGATCTTTTGA
>g386
CACCCGTATCCCACCGAGGATGAGAAGCGACAAATCGCAGCTCAGACAAACCTTACGTTA
CTGCAGGTCAACAACTGGTTCATCAATGCCAGGCGGCGCATTCTGCAGCCCATGCTGGAC
GCCAGTAACCCTGACCCTACACCCAAAGCCAAGAAGATAAAGTCCCAGCACCGGCCGACC
CAAAGGTTCTGGCCTAACTCAATCGCAGCTGGTGTCCTGCAGCAACAAGGAGTCCTACCC
GGGACAAACCCTGATGGCTCTGTGAATGTGGACGGCCTGCAGTCCCTGTCCTCCGACGCA
CTGACCATGCAGCAGGCCATACTGGGGGCCAACGACGACTCGCTGGATGGCTCCGAAGAA
GAAGACGAGGAAGAGGACATGGAAGAGGATGAACTTGATGAAGATGGTGAGGAGCTTCAG
ACAACGAATGTCAGTGAGCTGGGTTTGGGGCACAGTGACTCCTTGGAGTAA
>g375
ATGCACTATAAGAATACAAGGAAGACAATGGCATGGCAAGTAGTACCTTTCTTTGTCTAT
GTATTTTGTGATATTGCTTCTGGACACATTCAGTATTCGATTTTAGAAGAACTGAAGCAA
GGTTCTATTGTAGGAAATGTTGCAAAGGATCTTGGTTTAGACATGACAGAAATGAACAAT
AGAAAACTACAAATTACATCTCAAAGTAAAAAGCAATATTTTAATGTAAATGCAGGGGGA
CTGGCACTTTATACTGTCACAGATAGGGTAGACAGAGAAGGAATCTGTGAAGTGGAAGAA
GTCTGTTTACTGAACGTTGAATTACTTGCTGAAAATCCTGTGAATGTTTACCATGTTCAG
ATTGAAATTGAGGATATAAATGACAATGCTCCCAATTTTTCTAAGGCTATTTTTGATATT
GGAATAAGTGAGTCTTCCTCACCCGGAACACATTTTGTTTTAGGAAATGCAAGAGACCCG
GATCTGGGTTCAAATTCTCTACTGACCTATAATCTTAGTATGAATCTGCATTTCAGATTG
GGGGAAAAAATAAACACTCAAGGAATTAAATATCCTGAACTTATTCTAGAGAGGTCTCTT
GATCACGAAAAACAGAGTTTCCATGAATTAACTCTAACTGCCTATGACAGCGGTAAACCT
ATTAAAACTGGAACTGCTGTCATTAGGATTATGGTTCAGGACGTGAACGATAACTTTCCC
ACATTTAGTAAAGACACGTATACAGTTATTTTAAATGAAGATGTACCAATGGGTTTTCTT
GTTATCCGTCTAAACGCTACTGATGAAGACGAAGGTTCAAATGCGCGGATAACATATTCA
TTTAGTCATATTGCTGACAGTGCAAAAGATACTTTTAGTTTAGACCCCCAAAGCGGGGAG
ATTAAAGCAATTGGACCACTGGATTTTGAAGTTGTACGAAATTATAAAATTACCGTGGAA
GCTAAAGATGGTGGTGGTTTAGTGGCTCAGTGTACTGTATTGATACAGGTAGTAGACATC
AATGACAATGCTCCAGAAATAGTAATTAAATCTTTGTTTTCGCCGATCCCAGAGGATTCC
CTACCTGGGACACTTGTAGCACTAATAAATGTCAACGATCCGGATTCAGAAAACAATGGT
GAAGTAACTTGCTACTTAGCAGGAACATTACCAATGAACTTAATATCATCATCCATGAAT
TACTACAAACTTGTTACTACAGGTGCCATGGACAGAGAGACAACATTTAACTATAGTATC
ACTATATTAGCCGAGGATGAAGGTTTTCCACCAATGCTTACTAAGAAAACTATTCAAGTG
ACTGTTTCTGATGTGAACGATAATCCACCAATTTTTGATAAATTAAATTACGTTTGTTAT
GTCCTAGAACATAACCTACCTGGAACCTCAATACACCACGTCCATGCGTCAGATCTAGAT
GATGGTGAGAATGCTGCAATAGTATACACCATTCTTAATACAAATATTGATGACATACCC
GTATCATCGTATATTTCTATCAACTCGGAAACTGGAGTTATTTATGCACAGAGATCATTT
GACTATGAACAACTAAGAGAATTTCAGTTCCAGGTAATCGTTCAAGACAAAGGATCTCCG
CCTCTCAGCAACAATATAACAGTGAGGATATGTATAACCGATAAAAATGATAATGCTCCG
AAGATTCTCTACCCATCCCCTGACCTAGAAGAAATATCTTTATTTGAATTTATTCCCCGT
TCTTCCGAGAAAGGTTATTTGGTAACCAAAGTGATTGCAGTAGATGCAGACTCTGGACAC
AATGCATGGCTCTCTTATCATTTCCTCCAGGTTTCTGATTCACCTTTCTTTGTTATTGAC
CAACATACCGGAGAAATTAGGCTAGCGAAGGACTTGCAAGACACAGATTCGTTCAGAGAA
AAAGTGGCTGTTATGGTAAAAGACAATGGCGTCCCTTCTCTTTCTGCAACAGTCATACTG
AATCTTGTGGTGGCAGACAACTTTCAAAATGCTCTTCCAGAAATAGTCAAACAACCAAGT
GTTCCATACAGTTCACCTAATGTAACATTATATCTGGTATTAGCTATAGCTCTTATTTCC
CTATTGTTTATTCTGACAGTGATTGTTACCATCATTGTTAAGTGTAGAAATCAAACCACT
TCTCCAGTTTTTCCAAATTTAAGTAGAACCTGGTATCCTCAACTTTCCCTCACATGCCCT
TCTCAATTTAGTGATGGATCATTACCTTTGCCGTACTCGTATGATGTTTGTGTGACTCTT
GACTCAAGGCAGAATGAAATAGCTTATCTGAAACCAGTTCAGAATGTTCTTACCGACAAT
CTAATCGATACTGATGATCCTCCAACTGGATGTGATTCAACAAAAGATAGTTTTTCTTCT
ACTATTGTCACTCAGATGTTGTAG
>g387
ATGTCACAGCATGAGTTCCACAGCAACGGAGGTCAGCATTACCAAGTCTCCTCTTGGTCT
AATGTGAATAATTCTTCATCGCCAAATATCAAAAACAACATCGGCTTTATCGAGGTCCAT
GACATCAGAGTCCAGAATGACGTCAACAGCCTTGGAAAATTCAGCTTAAAAACGTCTGAG
CCAGAGCTACGCCTGCAGAATTTCCGGCCGATCGGCGAGGATGACGAAGCCACCCCAGTT
GACGTTGGCATCCCGACTCTGGAAATCAGTGACCCGGAACCCGTCCATTGCAGCAATCAC
GGCGTGAAGGCAAACTGCGCCGGTTCTGGGGATGAAAGGGTTTCGGGAAGCGCCAGGAAC
CCCCCGCTTCTGTCTGTCCGGAGCGCGGACCACGATTACGTCGCTTGGAAGTCGTCTACT
CTCCCGAGGTCCGGGTACGACGCCGCCAAGCTGTACAGCCCCACGTCTCTGAACAGGAGC
GACGACGTTTCCGACTGCAGCATCTCCAGCCTCAGCACCGAGTTCTCCACCACGTTATCC
GTTAGCAACGAGGATATTGTGGATTTTCTGGTTACGAGCAACTCGAGCGCCATCGTGACC
TTGGAGAACGACGAGACGCACTTCTCAGAGGTGACGCTAAATTCCACCAGGGACAGCACC
GATTCCAACCAACGGGGCTTAATTCACGAAGGAGACGTGGATAATAAAACGAAAATATTG
GGGCCGCTTAGTAACTTCTTTAACAGGTAA
>g379
ACAAAGCCTTTGATGGAGCTTCACCTGAAACTCATGAGAAAAATTGGGAAGTCGGTAACG
GTGGACAGATGGGAAAAATACTTAATGAAGCACCTGTGCGAGTGCCAGTTCGACGACAAT
CTGAAGTTTAAAAACATCATCAACGAGGAAGACGGCGACGCCATGCGGCTCCAGCCCATC
GGGCGCGATAAGGACGGCTTGATGTACTGGTTCCAACTGGATCAGGATCACAACATCCGC
GTGTACATCGAGGAGCAGGACGACCAGGACGGGTCCACGTGGAAGTGCATCGTCAGGAGT
AGGAATGAATTGGCGGAAACTCTGGAGCTGCTAAAAGCCCAGATAGACCCCGCGTTATTA
AAGAAATCCGACCCGCCGGAAAGTTCTTCTCGTGAGAGTCCCGATCCGGAAGACGACGAG
GTTAAAAAAGAAAACGAGGAGAAATCCATAGAGGATGGAGACATAAAAGAGGAGAAGCCG
GCGGATGGGGTGAAGCCGGAAACGGACTGCCCGGAGAGCGGAACTAAAACGTGTAAAACG
GAGGCAGAGACCGTAAAGGCCCCGAGTCAAATAAAGAGCGAGCCGTCCACGGATCCCTGC
GAGGCTCCCATCGCTGCCAAAGAAGACGACTCTTTCAAGGAGAACGTGAAGCCGATAAAG
CCGGAGGAGCGGTCAGAGCCCAAAGAATTAAAGGGGAACCCCGAGAAGATCCATCCGCCC
CAAGAACCCGAGCGCCCCGAAATATCGGTGATCGTGAAAAGAGCCGAAGAGCCGGCCGAG
AGGTCCGTGGAGGAGTCGGAAAAGCTGAAGAACGACCAGCAAGCTAAAATCCCCTTGAAG
AAACGAGAGCTGAAGTTGACCGATGATTTCGACAGCCCCGTTAAAGCGTCGCTGCACAAG
CCCGTCACCCCTACGAAGGAAGTGCTACAAAGGGACGACGGGAAACCGGAGGACGACGCG
GGCAAGGCCTCCGCGGGGGTCGCGGCTGCCGCAGACGGGAAGCAGCTTGTGAACGGAGAG
GTGAACAGCGAGAAGATGGCGCCCAAAGCCAAGCCGGACCCGGCCGAGAAGAACGGGAAC
AGCGCGAGAGAGTCCGTTGTATCCGTGGCCAAGGATGAGAATGGTCTGATGAGCAAGAAG
AGGAGCGAGCCGGTCATCAAAAGCCTAGAGGAGCCCAAGGAGAGCTCCAAAAACACAAGT
CATGAGAAACTGGAGAAGGTAGCGGAGCCTGGGGATGGTCCGTCTTCTCCTTCCGCAGAA
AAAGCCAACCAGAAACCAGCGAAAGAAGATCTCGGCAAGACTGAATGCCATAAAACCGAG
ACCAAAGAGGGAGAAACGAGGAAAAACGAACTTGTTTTGGTCCCCAATAAAGCTGCGGAG
GCCAAAAAAGACATCACGGAGCCGGCCTCGCTGGAGAAACAAAAGATGGCGTCTCCAGGT
GATGGCGGTAACTTGGCACAACTCCCGGCCGCGGATGGGTCTGAGAAGAAGCCTGAGCAA
ACGGTTCCGGAAAAGCACGACCTTCCAAAGGAGATGGAAGATGGCGGCCAACTGGAGGAG
AAAATCCTGAGAGGAGAGGATCCTGAACCCAAGAAACCTTCCGCTGTGAAACCCGATTCA
CCCGAGGAGGACGCGGCGGAATCCTCGACTACAAAGACCGACGCCGCCGAGACGTTATTA
AAAGAAACCTCTGCAGAGGCCGAGAAGACAGCGCAAAGTTCGAGAGACACGGTGGCTTCA
GTACAGAGCGAGACCAGCGTATCACCTGAAGATAAGGAGGGCGACGAGACTCCAAAGGCA
GAGGTGGAAAAGCCTTCGAAGACGGAGAGCCAAGTGTCGTCCTCGAGAAACAGACAAAAG
TATAAAACGATCCTGGAAGAAGAGAACAGCGGGACGGAAGGGAAGGAGATGACCTCCGAG
AGGCAGAAAGATGGCATCAAGCTGACCATCAGGATCTCCAACAAGAGAAAGAGGAATGAG
CCGACGCAGCCTGCGCCAGACGAGGCGGACGACGCCGAGGAGAGCATCGGCCGTTCTTTG
AGGCGCTCTCCCAGAATATCGCGCCCCTCGGCCAAGGTGGCCGAAACGAAGGAGCGGAAG
CCGGAAAAGAGACAGAGCGACGACGAGGAAACGGCTGCCCCCCCGAAGGCAGAAAAAGAC
GAAGAAAGGAAGTCTGAGAAAGACTCGTGTCAGAAAACCAAGCGGGTGCAGAAGCCCAGG
CAGAGAAGGCGAGCTCGCTGGACTAACTTTCGATCACGTCGCAGGCGCAAAGAGTCCAGC
GAGGAGGAGAGCGAGGAGAGCGACAGCGAGGAGGACTCGGAGGTCGGGTCCGAGGAAGAG
GAGAACGAGGAGGCAGCGGCTCCGGGGGAGGACGACGAGCCGTGCAAAAAGTGCAGCCTT
CCCAACCACCCGGAACTGATCCTGCTCTGCGACTCGTGTGACAGCGGCTATCACACAGCG
TGCCTGCGGCCCCCACTCATGCTCATCCCGGACGGGGAATGGTTCTGCCCCCCGTGCCAA
CATAAATTACTGTGCGAGAAGCTGGAGGAGCAGCTGCTGAACCTGGACGTGGTCCTGAAG
AAGAAGGAGCGAGCGGAGCGG
>g390
ATGGCCGTTATAAGAAGTGATAATGACTCCCTCCTCTCCGTCGTTCCGCTTTCCTTGTCC
GCTGGTGGATGTTGTCCTCTTCTGCTTGCGCACTGGGATCCTCCTTATGCTTCAGCTTTG
CTTTTTTTTATGTTTTTTATGTTCTTGTTTGATTTCACGTCTCCTCCAAAGCAGACCCTC
TTCCTTACACCAGGTACCTCCTACGACCAATGCTTTTTCCTCCCCATCCCCACCTCTCTG
GCTCCTCCAACTTCCCTGTCCGTTGCTCCTGTAAACCCGATCTCTCGGATCTCTTTGTTT
CCCCGCGCTCGCTCCGTGACCCTCATGAAACAATACTCCTTTACAGGGGGCCGCGTGAAG
ACATGGAAGAGACGCTGGTTCATTCTGACCGACAACTGTCTGTACTACTTTGAGTACACA
ACGGACAAGGAGCCCAGAGGGATAATTCCCTTGGAGAATCTCAGCATCCGAGAGGTGGAA
GATTCCAAGAAGCCCAACTGCTTTGAGCTCTACATACCGGATAACAAAGACCAAGTCATC
AAAGCCTGCAAGACCGAGGCCGATGGCCGGGTGGTGGAGGGCAACCACACTGTGTATCGG
ATCTCTGCGCCCACGCCGGAGGAGAAGGACGAGTGGATGAAGTGTATAAAGTTGGACCTT
TGTGCCCTTTTTTTGGACGGGCAGCTCAGCCCGCTAGTACGAAGCAGGCAAAGACAGGGC
AGAGGAGACCGCGCTCCCACGTCGATGACTGTAATGGAAATGAATCCGGCTGCCATCAGC
AGGGATCCGTTCTACGAGATGTTGGCCGCACGAAAGAAGAAAGTCTCTTCGACCAAGAGA
CATTAG
>g389
ATGGTGCTAATAACAGATGTACCCAGTGACCTGACCCCGGATGAGCGGCAGGAACTGGAG
AACATTCAGCGTCGGAAGCAAGAGCTGTTGGCGGACATACAGCGGCTGAAGGATGAGATA
GCCGAAGTTACGAATGAAATTGAAAATTTGGGATCCACCGAGGAGAGGAAGAACATGCAA
AAGAATAAACAGGTAGCCATGGGAAGGAAGAAATTCAACATGGACCCTAAAAAGGGCATC
CAGTTTCTGATCGAGAACGAGCTGCTGAAGCATACGTGCGAGGACATCGCGCAGTTTCTC
TACAAGGGAGAAGGACTTAATAAGACGGCCATCGGAGACTACTTGGGCGAGAGAGACGAC
TTTAATATTCAAGTCCTTCATGCATTTGTGGAGCTTCACGAATTTATGGACCTTAACTTG
GTACAGGCTCTTCGTCAGTTCTTGTGGAGTTTCCGCTTGCCGGGGGAGGCTCAGAAGATC
GATCGTATGATGGAGGCATTCGCTCAGCGCTACTGCCAGTGCAACCCCGGGGTCTTTCAA
TCTACAGATACATGCTATGTCCTGTCCTTCGCCATCATCATGCTGAACACAAGCCTGCAC
AATCCAAACGTCAAAGACAAACCAGGCGTTGAGCGATTTATAGCTATGAACCGTGGGATC
AACGATGGTGGTGACCTTCCCGAGGACCTGCTGAGGAATCTGTTTGACAGCATCAAGAAC
GAGCCCTTTAAGATCCCCGAAGACGATGGCAATGACTTAACCCACACCTTCTTCAACCCG
GACCGAGAGGGCTGGCTCTTGAAGTTGGATCTGTCCCTGAACACGGAGCTCAGAGTTCGA
CAAGCGTTAGTCAACCTGGCCTCCGGAGACCGAGCTTCTCGTCTGCCCGCCTGTCCGTCC
GGGGGCCGAATTCGTTTTGAAACGTATGATTATTTAGAAACAGTACCCTGTCAATGA
>g385
AACGAGCTTGACAACGTCTCGGGTCTTCTGGAAGAAGCTGAGAAAAAAGGGATCAAACTG
GTGAAAGACGTAGCCGGCTTGGAATCGCAGCTGCAAGACACCCAGGAGCTGCTCCAGGAA
GAGACGCGGCAGAAGCTCAACCTGAGCAGTCGCATTCGTCAGCTTGAGGAAGAGAAGAAC
AACCTACAGGAGCAGCAGGAGGAAGAGGAGGAAGCCAGGAAAGGGCTGGAGAAGCAGATC
CTCACCCTCCAGGCACAGCTGGCAGAGGCCAAGAAGAAGGTGGACGACGACGTGGGAACC
ATCGAAAACCTAGAGGAAGTCAAAAAGAAGCTGCTGAAAGACATGGAAGGCGTGGCCCAA
AGGCTAGAGGAGAAGGGTCTGGCCCACGAGAAGCTGGAGAAGACCAAAAACAGGCTACAG
CAGGAGCTGGATGACTTGATCGTGGATCTGGATCATCAGAGGCAGATCGTGTCCAACCTT
GAGAAGAAGCAGAAAAAGTTTGATCAACTTTTGGCCGAAGAGAAGAATATCTCCGCTCGT
TACGCCGAGGAACGCGACCGAGCTGAAGCGGACGCTCGGGAGAAGGAGACCAAAGCCTTG
TCGTTGGCCAGGGCTTTGGATGAAGCTCTTGAATCCAGGGATGAGTTTGAGAGGCTGAAC
AAGCAGCTTCGAACCGAGATGGAGGATCTGATGAGCTCCAAGGACGACGTCGGAAAGAGC
GTGCACGAGCTGGAAAAGTCAAAGCGAGCGCTGGAGCAGCAGGTGGAGGAGATGAGGACG
CAGCTGGAAGAGCTGGAGGACGAGCTGCAGGGCACCGAGGACGCCAAGTTGCGCTTGGAA
GTGAATATGCAGGCCATGAAGGCGCAGTTTGACCGCGACCTGCAGGCGCGCGACGAGCAG
AACGAAGAGAAGAAACGTCTGCTGGTCAAGCAGGTGAGAGAACTGGAAGCCGAGCTCGAG
GACGAGCGCAAGCAGCGGGCGCTGGCGGTGGCCTCCAAGAAGAAGCTGGAAATGGATTTG
AAGGATCTGGAGTCCCATATCGAGGCCGCAAACAAGGGACGGGAGGATGCTATCAAACAG
CTGCGCAAGTTACAGGCCCAAATGAAAGATTACCAGCGGGAGCTGGAGGAGGCCCGGGCA
TCGCGTGATGACATCTTTGCTCAATCCAAGGAGAATGAGAAGAAACTGAAGAGCCTAGAG
GCGGAAATTCTCCAGCTGCAAGAGGAACTCGCTGCCTCTGAACGCGCTCGGCGTCATGCG
GAACAAGAGAGAGATGAACTTGCTGACGAGATCTCAAACAGTACATCGGGAAAGTCTGCC
CTCCTGGACGAAAAGAGACGCTTGGAAGCCAGAATCGGCCAAATGGAAGAAGAGCTTGAG
GAAGAGCAAAGCAACATGGAGCTTCTCAACGACCGATTCCGTAAGACCACCTTACAGGTG
GACTCTTTGAATTCCGAGTTGGCCGCGGAACGTAGTTCCGCCCAAAAGAGCGAGAACGCG
CGGCAGCAGCTGGAGAGGCAGAACAAGGAGCTGAAGGCCAAACTGCAAGAGCTAGAGGGC
TCTGTCAAATCCAAGTTTAAAGCCACTATTGCCACCTTGGAGTCCAAGATCGCTCAGTTG
GAGGAGCAGCTGGAGCAAGAAGCCAAGGCGCCTGACCCGTTGCAATATGGGAAGACGGTA
CCCATTCTGAGGAGCGAGGGTGGTGAAGACTCTCTGGGTCAAACAGGCAGTCACCCTGAG
GATCAAGAATCCCTGGCGAGGATGAAGAGTGAGAGACCTTTGGGTCCTCTCGTTTGGGGG
AACCTGGTTCCAAGGAATCAAAAGGTTCCTCGTCAAAATCAGAGGAATCCTCAGGTGATA
CGACCTCCTCAGCGGAGTCAGGCTCCGAATCCGACTCCTCGGGGAGTGTCTCAGCACACT
TTTGATACAGGTACAAAGCGGCATTTTAACCCTCTGAGTTGTAGGAGGAGCAGCGTTTCC
ACGTCTGGCACACACACAGGGTTAAAACCACATTTACGAGACATGTTTTCGGGGGGGTCT
TTAGCGAGCAAAAGAGAACAAACCGCGGCCGAACTACGCCGGCAACATAACGAGGGAAAC
AACAAAGTCGGACATATCGGGAGAGACAACGGTAAGTAA
>g393
ATGGGGATGCAGGACTCCAGCATCATGGCGTGGAGGATTAAGACCTCAGTGCAGCATCTG
CTCGTCGTGAACGCCTTTCTCATCCTGGCTCTGCTTCTTCAGTATGGGGGAGGACAGAAA
AAGAAAGAGAACCTTTTAAGTGAAAAGGTGGAGCAGATGATGGAGTGGAGCTCCCGGCGT
TCCGTCATCCGGATGAACGGAGACAAATTCCGGAGATTCGTCAAAGCGCCCCCACGAAAC
TATTCCGTGGTCGTGATGTTCACGGCCCTGCAGCCTCAGAGACAGTGTTCTGTGTGCAGG
CAGGCTAATGAGGAATATCAGGTGCTGGCCAACTCGTGGAGATATTCATCGGCGTTCTCA
AACAAGCTCTTCTTTACTATAGTTGACTACGATGAAGGAGCAGACGTTTTCCAGCAGCTC
AATATGAACTCCGCACCTACGTTCATGCATTTTCCTGCCAAGGGGAAGCCCAAGAGAGCG
GACACCTTTGACCTTCAGCGAATTGGCTTTGCTGCAGAGCAGTTGGCGAAGTGGATTGCA
GACAGGACCGATGTCCATATTCGTGTTTTTAGGCCTCCGAACTATTCAGGCACGATTGCC
CTGGCCTTATTGGTTTCCTTAGTGGGAGGTTTGCTTTATCTGAGAAGAAACAATCTGGAA
TTTATTTATAACAAGACCGGTTGGGCAATGGCAGCTCTGTGCGTCGTGTTTGCCATGACA
TCAGGACAAATGTGGAATCACATACGTGGACCTCCCTACGCTCATAAAAATCCACAGAAC
GGCCAAGTGAGCTATATTCATGGAAGTAGCCAAGCCCAATTTGTGGCAGAATCTCACATT
ATTCTTCTGCTGAATGCGGCCATCACGATGGGAATGGTTCTCCTCAATGAAGCGGCCACG
TCCAAAGGAGATGTCGGAAAAAGACGGATTATATGCTTGGTTGGGTTGGGTCTTGTGGTC
TTTTTCTTCAGCTTCCTCCTGTCGATCTTCCGTTCAAAGTACCACGGATACCCATACAGA
CCATCTCTCATATCTACTGAAGAGAACTTCTCGAAGTCTGTAGCCAAGTTTGGATTGCTC
CGTCTCACCGATCAGGCTTATGGTTGCCTCTAG
>g388
ATGCAGCTGGCACAGGGAAGGTTCGTCACCTCCCCCACCGGTGCTTTGTATATCCTGGAT
GTACAGAAAGAGGATGCCCTCTCCACATATCGGTGCATTACCCGGCATCGCTACAGCGGA
GAGACGAGACAGAGCAATGGAGCACGGCTCCTTGTATCAGATCCTGCGGAATCTGTTCCA
GTTCTTCTCGATGGGTTTCAGTCCCAAGAGGTCCTGGTGGGGGACATGGTAGATCTGCCA
TGTATTGCCTCGGGATACCCAAACTTAGCAAGTCGTTGGATTAAAGATGGACGCCCAGTC
CCCTCTGACAGTCGCTGGAGCAAGCGTAACACAGGTCTAAGTATGACTGACCTTCGTCTG
GAGGACAGCGGCACCTATATTTGTGAGATAACCAACAGCTTTGGCTCTGCAGAGGTCACG
GGTACATTAACAGTTATAGAACCACTCCGTGTGACCCTTACTCCTAAGAAGCTAAAGACA
GGGATTGGTAGTACTGTCATCTTATCCTGCACTCTAAGTGGATCACCAGGTTACACTGTG
CGCTGGTACCGGAACACAGAGCTTATTGAGCCGGATGAATATGTTTCTATACGAGGAACA
GATAATGAAACACTTGTTATCAACAGCGCTCAGAAGAGCCACTCAGGGGCATACCAGTGC
TTTGGAACACGGAAGACACAAACTGCTCAGGACTTTGCCATTGTGGTCCTAGAAGATGGT
ACGCCCCGCATCCTCTCCTCATTCAGTGAGAAAGTGATGAACCCAGGTGAGCCATTTTCC
CTTATGTGCTCTGCCAAAGGGGCCCCACCCCCAACGATCAGCTGGAGCTTAGACGAAGAG
CCAATCCAGCGGGATCCAGGGCACCGTACAAATCAATACACTGCCTCAGATGGAACCACC
ATCAGTTACATGAATGTGAGCAGTCCACAGATCCTCGATGGTGGGGTGTACCGCTGTTCT
GCACGCAACTCTGTGGGGAGTGCAGAGTACCAAGCTCGAATAAACGTAAGAGGCCCTCCC
AGTATTCGACCAATGAAGAACTTGACAGCGGTGGCTGGGCGTGACAGCTTCATTCATTGT
CGTGTCATCGGATACCCCTACTATTTTATCAGCTGGTACAAGGACTCTCTGCTACTGCCT
GATAACCACAGGCAGGTTGTGTTTGAGAACGGGACCTTGATGTTGAGTGATGTACAGAAA
GGGATGGACGAGGGTGAATATCTATGCAGCGTGCTCATACAGCCTCAGCTCTCTATCAGC
CAGAGTGTTCACATCACAGTAAAAGTACCACCCTTGATCCAGCCGTTTGAATTCCCCCCG
GCCTCTATCGGACAGCTCTTGTACATCCCGTGTGTGGTGTCCTCAGGAGACATGCCAATA
CGCATTACATGGCGCAAAGACGGACAGGTGATTGTGTCTGGCTCAGGAATCACCATTGAG
ACCAAGGAGTTCATGAGCTCCCTCCAGATATCCAGCGTGTCTCTCAAGCACAACGGCAAC
TACACCTGTATAGCAAGCAATGACGCTGCCACGGTGAGCCGAGAGAGGCAACTCATAGTC
AGAGTGCCCCCCAGATTTGTGGTCCAGCCAAACAACCAGGATGGAATATACGGCAAGGCT
GGGGTGCTTAACTGCTCTGTGGACGGTTACCCTCCCCCAAAAGTGGTGTGGAAGCATGCT
AAAGGCAGTGGGAACCCTCAGCAGTATCACCCGGTTCCTCTCACTGGGAGAATCCAGATT
TTGCCCAACAGCTCCCTGCTCATCCGGCACGTTCTGGAGGAAGACATTGGTTATTACCTG
TGCCAAGCCAGCAACGGCGTGGGTACCGATATCAGCAAATCCATGTTCCTCACTGTCAAG
ATTCCAGCAATGATCACATCTCACCCCAACACAACCATTGCAATCAAAGGTCAGACAAAG
GGGCTGAACTGCACAGCACGAGGGGAGCGCCCCATCATCATCCGCTGGGAGAAAGGGGAC
ACGGTGATAGATCCAGACAGGAACCTGCGCTACCTAATAGCCACTAAAGACAGTGGAGAC
GAGGTTATCTCCACCCTGACGCTTAAGCCAGCAGAACGAGGGGATTCAGTGTTTTTTTCC
TGCCACGCAATAAATTCGTATGGAGAGGACAGGGGGCTTATCCAGCTCACAGTGCAAGAG
CCTCCAGACCCTCCTGAATTGGAGATTCGGGAAGTCAAAGCTCGTAGTATGAACCTGCGC
TGGACACAAAGATTTGACGGAAACAGCATTATTACTGCCTTTGATATTGAGTATAAGAAT
AAATCGGACACCTGGGAATTTAAGCAATCCACCCGCAACATATCCCCCATCATAAACCAG
GCCAACATAGTGGATCTGCATCCGGCGTCCGTGTATAGCATACGCATGTATTCCTTCAAC
AAGATTGGTCGCAGTGAGCCAAGCAAGGAGCTCACAATCAGCACAGAGGAAGCAGCTCCC
GATGGACCACCTATGGATGTTACCTTGCAGCCGCTCACATCACAAAGTATCCAAGTAACA
TGGAAGGATGTGCCTCTTGTTCGGTCTCTCTTCTCTTTCTATAAGATGCACCCCTTGTTC
AGTCTCTTCTCCTTCTATAAGATGCACCTCTTGTTCGGTCTCTCTTCTCTTTCTATA
>g406
ATGCGCTGGTCGTGTGAGCACCTCATCATGGTGTGGATCAATGCCTTTGTCATGCTGACC
ACGCAGCTCCTACCACCCAAGTATTGCGACTTATTACACAGGTCGGCTTCTCACCTTGGA
AGGTGGCAGAAGTTGGAACACGGGTCGTACAGCAACGCGCCGCAGCATATTTGGTCGGAA
CACACAGTATGGCCGCAGGGGGTCCTGGTACGACACAGTCGCGGTTTATACAAAGCCGTC
GGGGCGTATAACGTAGCAGTGCCTTCAGATGTGTCTCACGCCAGGTTTTATTTTCTGTTC
CACCGGCCGTTACGGTTGCTGAACCTGCTCCTCTTCATGGAGGGCAGCCTGGTGCTGTAT
CAGCTTTACTCCCTGCTCCGGGCCGAGAAGTGGAACCACACGCTGTCCATGGCCCTCGTC
CTGTTCTGCAACTACTACGTGCTGTTTAAGCTCCTGCGGGACAGAATAGTATTGGGGAGA
GCCTACTCGTACCCCCTCAACAGCTACGGACTGAAGCCCCTACTGATCGCCCCCCCCCCC
CGCCCACCGGCGTTCAGGAAAGACAAAATCGGAGGAAATGTCAATCGGGGAAAATATTTT
CATACAGTTCTATTTTTTTTTCTTGCAATGTTTATAAATATTTAA
>g411
ATGGAGAGGTTGAGAAATAGACTGATGTCCTATAGGGCGCCGGGCACTCAGGGAGCCGTG
CCGCTGAGGAAGAGGAAATCCAGGCTTTATAGCAAAAGCGAGACGAATGTAGATACGGGA
GGAGGTGTCCTTGGAGAAAACACTGCTTTGGTCCTCTTAACCATCGCTTTCAGGATCATC
AACTGCTTCTTGGTTCAGACAAGCTTTGTTCCCGATGAATACTGGCAGTCTCTTGAAATC
TGGATTCCTCGATTGGCACAGGCTGTGTTTTCAAGTCTTGCAGATGTAAGACTTTACACC
TTACTAAGGAAATTGGAAAATGCAGACTTGGCAAAGTGGGTGTTTTTTTGCCAGCTGTGC
TCCTGGTTCACATGGTTCTGTGCCACTCGGACTTTGACAAACACCATGGAAGCAGTACTT
GGAATATTTGCTCTTTACTATTATCCTCTGGAAGGTTCACGCACAAAGAATAGCGCCAAA
TATTTGATATTCATAGCCCTGGCCTTCCTTATTCGACCAACAGCAGTCATTCTTTGGATT
CCTTTACTCTTTTTCCATTTTCTCAAGGAGCAGAGGAAATTGGACTTGATTGTTCAGCAG
TATCTGCCTATCGGCACCCTGAGCCATAAAGAATTTCGCTTTATCTATCCAGTGCTGCCT
CTCTGCATGCTGTTTTGTGGTGAGTACTCTGTGTATGATCTACCAAGTTAG
>g408
ATGTCCGCTGAGCAGGGGAAGGAGCCCTATAAGAGAGCTGGAGCTGTTGAAAACGATGGG
TTATTGAGACACAGCGTACCGTTTGGAAGCCCTGAGAAGAAGAAACGCAAGTCAAGTGCA
CAGCCCCCTCGCTCAGAATATGCCCCACCAGCGAACACAAGTTCAGACCATCTCATAGCT
TCCAACCCCTTTGATGATGATTATAATGTGCCACCTCCGCCTCTGGGGTACAACGTTTTT
GGAAATGCAAGGTATGCTGCTCCTGAAGCTTATAGTGCTTTTAGTATGCCACCTACAATG
TCACCAAGGACATCGTCCAGATTTGCTGCCTTACATGCCCTCCGAGGTAACCTGCCTCAT
TTTCCACAAGATGGGCTGGAAAAGCCATTTGGTAGAATACTCCCCTTCAACCTGGCCTTA
CAAGAGAACCCATATTATAGCGGGCTAAGTGAGACTATTACCTTCCCAGGACAGCACTTT
ATATCTAACCGTACCGAGAGCAGCCAAAATGTCACCAGAAGGCATCCTAACCCAACTGAT
GCCAATTTTGCCCCTCACAGAGGCCTTGGTAACCAGCCAAATAATAATCTTCCCTTGGAA
ACAAGCCTTACTTCTGTCTGTAACTCGAGAGATCCAAAAACATACTCCTTAAAACATGAC
TTTAGCCCAGTTAAAAGCAGAAATTGGACTCCAAATTCCACTGCGCTTTATCTGCAACAA
CATTCAAAAGATGGTATGCATTCTACTGCCGGTACAAATAATCATCAAAAAAGCCCAGTA
CCAGGAACTGAACGCTCCCATTCTACCAGCTCTGAACCCAGTTATGCCAATGACATTGAG
AGGGGTCCAGAGACGCTTAGCGCGTCAAAATTAGCAAAAGCTGATGTAACGGCTAGTGAA
AAGTGCAATAGATGGCTCCTCCATTCTTCTTACTGCGGCCACTTGCCTACGGTTCCATTG
TATCCATGTGGAATTTGTTCTGGAGATGTTATCGGTGTCCAAGATGCCATCATGTGTAAA
GCTTCTTGTCAGAAGTGGTTTCACAGAACGTGCACTGGGATGACAGAGATTGCCTTTGCG
TTTCTTACTGCGGAAACATCTGCCATCTGGGGTTGTGACTCCTGTATGGCAAAAAAAGAC
ATCAAGTTGGTGCGTGTTCAGAAATCTATTGTTTGA
>g409
ATGCCCATCCTGGTCAAGGATTACACATGGGAGCAAACCGACAAGGAAGTTTATATTTCC
CTGCCGTTAAAGGGCACCAAAGCCGGGGCGTCCGACGTGCTTTGCACTGAGGTGTATCTG
AAGGTGAGTTTTCCTCCGTTCCTTTTTGAAGTGTTTCTGTTTGCTCCCATCGATGACACA
AAAAGCATTGCTAAGGTTGGAAATGGAATTATCTTGTTCACGCTGCATAAACAAGTGCCT
TCTATGTGGGAAATGCTGACAGCAGTCAATCTGGAAAAGAAGGACATGCAAAAGATACGT
GAAGATTCAATTGCCAGAGTTCAGGAAAAAGCAAAAGAAGAAGCCCAAACCAAGGCTGTA
CAGAAAAGAGAAAATGAGAAATATTCTCTGGAGGTCATGATGAAGATGGATGACGAAGAG
AGAAAGCGAATTGAAAAAGAGAAGGCGGAAGAAAGAAGAAAGGCTACAGAAGAGCTGGAG
AAGTGGAAGGAGCAACAGAGGATTGAAGAGGAACAAAAAATGATTCAGGTAGCACAGAAG
AAGAAAGAAGAAGAAAAAATAAAGAAAGAAAAAGAGAAAAATATGGTTAATGCAAATAAA
TCCATATTTCCAAGCAAAGCAAATTCCTGCCCAAAAGGACGTGAAAAGATTAATGAAAAG
ATATTGCCTCCTACTCGTACGAATGGCTGTATTAAGATTCATTTTACCCCTCGAATCTTC
CCCACTGCTGTCAGGGAGTCTCGACTGGCAGAAGAAGAAGAGTGGTTACAGAAGCAGGCT
GAGGCACGGAGAGCTATTAATCTTGATGATCAAGAACTTAAGGATTTAAAAGAAGAGGAA
AAAAATCCAGAGTGGCTAAAAGATAAAGCAAATAAACTCTTTGCAGCTGGAGACTGTCTT
GCGGCTGTGAACGCGTTGAACCTGGCTATACGCTTGAATAACAAGATGCCAACGCTGTAT
CTCAATCGAGCTGCCTGCCACCTTAAATTAAGAAACCTCCATAAAACCATTGAAGACTCC
TCAAAGGCACTAGAGCTTCTTACACCACCTGTGCCAAACAATGCAGCCGCAAGAGTTAAA
GCCCATGTGAGACGTGGAACAGCATTCTGTGAGCTAGAGCTCTATGTCGAAGGCCTCCAG
GATTATGAAGCTGCTCTGAAGATTGACCCCACCAACCAGATGGTGAAATCTGACGCAGAA
AGAATTCGGCAGATTATCCAGGGTTCCTCCGCTGATGCCCAATAA
>g412
ATGACAAAACAAGTGGCAATAATTGGAGCTGGATGCAGTGGGCTAGGAGCCATCAAATGT
TGTCTGGAAGAAGGGTTGGAGCCAACATGCTTTGAGAAGAGTGATGACCTTGGTGGACTT
TGGAGGTACACAGAAATGGTGGAAGAAGGAAGAGCCAGTATTTACAGCTCTGTGGTAACC
AACACCTCCAAGGAGATGATGTGTTTTGCCGACTTTCCCATGCCAGATGACTTCCCAGCA
TATTTGCACAACTCAAAGGTCTTGCAATACCTTAGACTCTATGCTGAACACCACCAGCTA
CTGAAATACATCCAGTTCAAGACTGAGGTTTGTTGTGTGACGAAGCATCCAGATTTTGCT
AATACCGGCCAATGGGAAATTGTAACTGAGAAGGATGGGAGGCATAAGAAGAAGACAACA
TTTGATGCCGTTTTAGTTGGCAATGGTCATTTTTTTAAACCGTATCTCCCCCTTGATTCT
TTTCCAGGTCTAGAAAAATTTAAAGGCCAGTACATTCACAGCCGTTTCTATAAGAAAAGT
CAAGATTATCACAAGAAAATTGTACTGGTGGTTGGAATTGGAAATTCAGCTGGAGACATA
TCTTCTGAAATCAGTGGCACAGCCAAACAGGTATATCTCAGTACACGTCAAGGATCCTGG
GTGCTAAGTCGTGTTTCACAACAAGGATTTCCATTAGACATGATGTTCTCAACACGGTTT
CATTTCTGGATTACTAATGCTTTATCTGATGGTGTTAGAGCAAAGATGATTGAAAAACAG
ATGAATGGGTGGTTTAACCATGCAAACTATGGTTTACAGCCTAAGGACAGGTCTACGTTA
AAAGAACCGATTGTAAATGATTACCTTCCCAGCAACATCCTATGTGGAGCTGTCCGAGTA
AAACCCAGCATTAAGGCATTCACAGAGACTTCTGTCATTTTTGAGGATGGAACAGTAGTT
GAAGACCTGGATGCGGTTATATTTGCCACTGGATATAGCGTCTGCTTTCCTTTCCTCGAT
GACTCTATCGTCAATGTTAACGATGACAACAAAGTCACACTGTATAAATATGTATTCCCT
CCGCATTTAGAAAAGCCAACGCTGGCTTTTCTGGGAGTCCTCCAACCATTTGGGGGTGTC
ATACCGGTCGTGGAACTACAGTCCCGCTGGGCCACTAAAATTTTTAAAGGTGCTGCTTGT
TTACCTCCGGTGTCCAAAATGGAAGATTATATTAAAAAGAGTGAGAAACTCAGAGCTAAG
AACTTCACCAAGTGTAGAAATCAGAGTCTTCAGGCGCAGTATGTTGAGTACATGGATGAA
GTTGCAATGGAAATTGGTGTCCGTCCTAACATAACACGCTTCTTACTTACAGACCCCAAA
CTTGCTTGCAAAGTCTTCTTTGGGCCTTGTACACCCTATCAGTATCGTCTAACTGGCCCT
GGCAAATGGAATGGAGCCAGGCAAGCTATCCTGACCCAATGGAACAGGACTCTAAATCCA
TCCAGGACCCGTATTGTTTACAATTCTCAAGAATCAAATTATAAGAGTCACTTAGTTGGC
AAGGACATACCAACGGCCACGCTGTTCAGAGACGCGGATCCCCACCAGAGCCATGGCCTG
CTCCACTGCCTCTGGAATAACTAA
>g414
ATGGTTAAGACCGTTGGAATTATTGGAGCCGGTGTTAGTGGTCTAACAGCTATCAAAAGC
TGTTTGGAAGAAGGTTTAGAACCCACATGCTTTGAAAGAGGTGACGACATTGGAGGGCTC
TGGAACTTCAGAGAGGATTCAGAAGATGGCAGACCCAGCATCTACAAATCTTTGGTCAGC
AACGTTTCTAAAGAAACAATGAGTTTCAGTGATTTTCCAATACCAGAGGATTTTCCTAAC
TTCCTACCTCATGTAAAATATTTGGAATATTGCAAGTTATATGCACAACATTTTCAGTTG
CTGAAATACATAAAATTTAAGACAGTGGTTTGCAGTGTGGAGAAGCATTTGGATTTTAAG
CAGACAGGGCAGTGGGTTGTTATCACTGAATCAGACGACAAAAAACATACAACCATCTTT
GACGCAGTTATGATTTGCTCTGGCCAACATGTGGATCCTTTATTACCAATGGATGCTTTT
CCAGGTATAAACAAGTTTAAGGGAAAAATTCTACACTGCCGACAATACAAGAGACCAATT
GGATTTGATGGGAAAAAAGTGTTAATCATAGGAATGGGTAACAGCGGAGTTGATCTATCT
ACTGAGCTCTGTACCAGAGCTTCACAGGTATACCTCAGCACAAAGAGGGGTGTTTGGGTT
TTACGCCGCCTTGGAAGTAAAGGATACCCTTATGATGTACTTCTTCTTACTCGATATAAG
AGCTGGATCCAAAGCATTCTACCACTTGCTGTATCACAGTGGTTATTTAAGAAGCAAATG
AATAATCAGTTCAACCATCATCTCTATGACTTTGAACCAGAAGGAGCCATGACAAAAGAA
CCATTGGTTAATGAAGAGCTCCCGAGTCGCATTCTGTCAGGATCGATAATTATGAAGCCT
GGAGTAATTAAATTCATGGAGACATCAGTCCAGTTTTCAGATGGCACAACAGTAGACAAT
ATTGACATTGTCATCTTTGCCACAGGATATAATCTATCATTTCCATTCCTGGACGAATCC
GCCATTAAAATGGATAACAGTAAAGGATTTTTATACAAAAAAATAATTCCTGTCGACATT
GAAAAACCCACATTAGCTTTCATTGGTTTTATTCAGCCAGTTGGGTCAATCATGGTAGCT
GCTGAACTTCAGAACCGTTGGGCTACTAGGCTCTTTAAAGGATCACTTGAGCTTCCAAGC
AAAGACGAGATGAAGAATTACTTAGTCAGTGATGAGAAATTCAGAATTAAATGGTTTGGG
TCAGCAAAAGAGAATTCCCGACGTATGAACTACGTTGCATATTTGGATGAATTGGCGTCA
CAGATTAAAGTAAAGCCAAACATCCTGAAACTGCTTCTGACAGATCCAGTTTTGGCTCTG
AAAGTTTTTTTTGGACCACTCAATTCTTATCAATATCGTTTAACTGGTCCTGGAAAGTGG
GCTGGAGCAAGGGATGCCATTATGACCCAATGGGATCGTATCGAAAAGCCTCTGAGAACA
AGAGGCAAACGAGAAAAGTCATGTTCTCCTCTGTTGACTCGTTTGCCTTTGTCGATCTTG
CCCTGGATCTTCTTCCTTGTGATTTCACTTTTAGCTTTTTGGATAAAAAGTTAA
>g413
ATGGCACAGAACATAGCCGTAATTGGGGCTGGAATCAGTGGTCTTGCGGCTCTTAAATGT
AGCATAGAAGTTGGTAATCGGACTGTTTGCTTTGAAAAAGGTGATGACGTGGGTGGACTA
TGGAATTTCATGGACCATGCAGAGGATGGAAGAGCAAGTATCTACCGTTCTGTATTCACT
AATGCTTGCAAAATAATGATGTGTTATCCTGATTTTCCAATACCAGATGAGTACCCCAAT
TTCATGCATAACAAAGTCTTTCAGGATTACTTGCGCCTGTATTCTAAATATTTTGACCTG
CTGAGGCACATCCAATTTAAGACAGCTGTGGTTAGTGTGAAAAAATGCCCAGATTTTCAG
GAAACGGGCAAATGGGAAGTTGTTACAGAATGCAATGGGAAACAGAAATCAACCATCTTT
GATGCAGTGCTTGTCTGCACTGGCCATCATGTGTATCCAAACCTTCCTCTGCAGTCCTTT
CCTGGCATTGAAAAGTTTAAAGGACAATACATGCATAATCGAGATTATAAGGAGCCATCA
GGCTATGTTGGAAAGCGGGTACTAGTAGTAGGATTAGGCAATTCTGGAGCCGATATTTCT
GTTGACCTCAGTCGTACTGCTGAAAAGGTATGGCTCAGCACAAGAAGCGGGTCTTGGATT
ATGAGCAGAGTTTGGGATAATGGCTATCCCTGGGACATGGTTTACTTGACTCGCTACCAA
TCCTTCCTGAATAAATTCCTTCCAAGAGCCCTATCTGACTGGTTGTATGAAAGAATGATG
GAAAAAAGGTTCAGTCATAAAAACTATGGTCTGGTGCCGCTGAACAAGAGTCTAAGGAAG
GAACCTGTATTCAATGATGAAATAGCCACCTGTATTACCTGCGGTACTGTCATTGTAAAA
CCCAATATCAAAAAATTTACCGAAACCTCTGCTGTGTTTGAAGATGGGACCATCATCGAC
AACGTAGACGTAGTTATATTTGCCACTGGTTACAGCTACGCTTATCCATTCATGGATGAC
TCCATTGTGAAGAATAATAAAAATAAAGTGTCTCTCTACAAGGGAGTATTTCCTCCAAAA
CTTGAAAAGCCTACACTTGCTGTCATTGGACTAGTTCAGTCTCTGGGAGGAATTCCACCA
ACCTCTGATGTTCAGGCTCGTTGGGCTGTCAGAGTTATCAAGGGAGAATGCAAACTTCCA
TCGAAGGAAACAATGACCAAAGAACTAGACGAAGAGGAAGGTGAAAAAAAGAACTGGTTT
GGTCGGGGTGAGACTTTGTCAACAGATTATGTCTCCTACATGGATGAACTGAGTTCATAC
ATTGGTTGCAAACCCAACCTTCCTCTTCTTTTTCTTACGGATCCCATGTTGGCATGGCAG
GTCCTCTTCGGACCATGTAGCCCTTACCAGTTTCGATTGACGGGCCCTGGAAAATGGGAT
GGTGCAAGAAATGCTATTTTAAATCAGTGGGACCAAACAATTCAGGCCACGAAAACTCGT
GTGGTGTCTTCAGACGCGGAGTCCTCCAGTTTTAATACATTAATCAAGTTGCTCTTTATT
ACTCTGCTCCTGTTTGCTGTCTTTCTGGCATTGCCATAA
>g410
ATGTCCGAGAACTCGAGTGACAGCGAGTCTTCTTGTGGCTGGACAATTCTTAACCATGAG
GGTTCTGATATAGAAACCCTTAACTCTGACAATGGCGAGACATGCTCTGATTTTCCACTA
GAACAAAGCGAAGCCCTCGAGGAGGAATTACGCCCTGATACACTTCCACAAGGGCTACCA
GATCTGTGCAGCAACGAGAACACCGCTTCTGCTATAGAATTATCTTCTTCAAGTTTGAAG
GAAGCCCAGCCTGCTCCTGAGGATTTAACTCACTATGGCCTCCCGCAAAAGGTGGAAAGG
TCCCTTCCAGATACATTTTGTTACCGAGAAGAGGGGAAGTTAGCTGAAGACGTTGTATGT
GAGGCTGGCAGTGATGACTCTGATATAGTTACCTTGGAACCTCCCAGAGCAGATGAGATT
GGGCCCTTGGACGAGGACGTGGTGGCTTTGGAGGAAGAGGTTGCAATCACTGAAGATGTT
AACTTGAGCTCTTCCTTTAGTAGCCAGTACACTTTCAGCCAGCCAGAGACAGTTTTCCCA
TCTCATCACAGTGCAGATGACTCCAGCAATGATGAAGCAAGCGATGTGTCCGGTCCTGCT
CTCCGACGCCGTCGTGCAAAGAAAGATTCTGAGCATAAGGCTCCCACTGACCCTCCTGCA
CCTGTTGAACCTAAAGCTTTTGGCTTCCTAGGGCGCAGCCTGAATAAGTGTATTATTCTT
GCCCTGATCATTGCTATGAGTATGGGTTTTGGACATTTTTATGGTTCAGTTCAGATTCTG
GAACGTCAGAAACATGTAGAAAAGATTTATGAACATGAACTAAATGATGTGAAGGATGAT
CTTTATCAGTGTCAGGAGCAGAAAGCCGTAGTAGAACAGCAGGTATTATATGAGCAGCTT
ACCGAAGACCCAGAGGAGACACAGGATATGGTTTCTTCTCTCAAAGGCCTGATGGTAAAA
ATGACAACAGAAAATCATCTGCTGAGACACAAACAGGCTCAGCTTCAGACCGAAACAGAT
GACCTTACAAATGCTTTAAAAACAACAGAAGGGGAAAATCAAAAACTTGCACAGGAAAAC
CAGTATTTAAGAATATCTTTAAAGAAAGGGGAAGAGGCATTTTCCTTATTGCAAGAAGAG
CTAAGAAAGCTTAGAGAACAGATCAGGAGCTTGGAAGAGAAAGGAAGTGGAGACCTAATC
TTATCAGAAAACCGAAAACTTAGGACACATTTGAAAGAGGAAAGACAAAAGATTCGGAGC
TTCTTGACACAGAAGGAGATTCTGTTAGCTGAAGCACAAGCCTTAAGAAAAGAGTTGGAC
AGCGAGCATCAGATTACCGAATCCTTGAAGGCCAAACTGGAAGAGATAAGTAACAGACAG
TCACCAGATATGAAGCATGGTATGGCTACTGATGGTGAAGAGACTGAGCAGGTGAGAGAG
AGACTTTCTGACTTGGAGAAAAGGGTAGTTTTTGAACAGCAAAGATCAGATTTATGGGAA
AGACTGTATATTGAAGCAAAGGAGCAGAATGAACAGCAAACTGAAGCTCTACGTGATTCC
CAGAAGGGACAGAAAAAAGAGAGCAGAGGCAAAAAGAAGGCGAAGGATACATTCTTCAAT
TCTGTGAAAGACACATTTGATGCCATGAAGAATTCAACCAAGGAATTTGTCAGACACCAC
AAAGAAAAGATCAAACAAGCCAAAGAGGCTGTAAAAGAGAATCTGCGAAAGTTCTCTGAT
TCTGTAAAAAGTACTTTTAGGCAGTTTAAGGACTCAACCAACAATATGTTTGATAGAAAC
CGCTATAGAAAATACACTGAGAGGAGGCGGGAAGAGACAAAGGACGCACGTACAGTACGT
CGGGAATACAAGTCTGATTCGGAGGAAGAGTATCCAAAAAGGTCAACAGCCGGTCAAAAT
GAGTATAACAACTTAAATGATGATGGGCTTTTTAAAGATGAACCTCCATGGAAATCAATG
CATGCCAAGAAGACAAGTAGTGAACAGTGTACCAATAAAAAGGGTTGTTCTGGAGTGTTT
GAATGCGCTCACCAAGAATCCTTCAGTCTTTTTAACAAAGTGTTGGACCCTGTGAAAGTG
GAAGATTTCAACCAGTTGATGCAGGCCTACGTACAGGAGCAAGTAGATAATTTCAGACAC
TGGAAGGAGCTAGAGCAGTTCATAAACAAATTTTTCAAGAATGGCGTTTTCATTCATGAT
CAGATGCTTTTCACAGATTTTGTTAATGATGTTGAGGATTATCTTGAAGACATGAAAGAG
TATCAGTTTAACAATGCTGGAATATTTGAAGATCTTGATGAATACGTGTACAGGCATTTC
TTCGGAAGCGATTACAATACTCCACATGGACCAAGAAAACCTGACAAAAATCCTCCTTAC
AAGGATCCAGAAGGTTACAGATACAGAAAGCAGGAGCAGAAACATCACCAAAATCGCTAC
AGAAAAGAAGGTAAATGGAATAAGCATGGACGTGCCGATGGAAGACACATGGCCAATGTT
GAAATAGATTTGGGGCAGTTGCCATTTGATCCAAAATATTGA
>g407
ATGGGTATGTCTGCGTTTGAAGAACAACCTGTCTCTGTTGAGGTCCAAGAAGGGGCTGTT
GCACGATTTTCTTGTAAGATAACAGCCAATCCCCCACCTGTCATTACCTGGGAGGTAAAT
CGCACAACTTTGCCACTCGCCAAGGACAGGATTACTGTGCTGTCAAGAGGAGTTCTTCAA
ATCTATGGAGTCACCAAAAATGACGCTGGGAATTACAGATGTGTAGCTACCACAATAGCC
AACCGGCGGAAAAGTGCAGAGGCTGTGTTGACTGTTTCCCCAGCCACAGAGATTGGATCT
TTCCAGAAACCCATCATCATTGCAGCACCTCAAAACACAACTACCTCTCTTCACCAAACC
GTTACTCTGGAGTGCATGGCCACAGGAGTTCCAAAGCCGATCGTGTCTTGGAGTAGGCTG
GACCATAAACCCATTGATGTCTTCAACACACGAGTTCATGGAAATGGGAATCTCATTATA
TCAGACGTGAAGCTGGAACATGCAGGAGTCTACATTTGTAGAGCTACCACACCAGGCACA
CGCAACTACACGGTGGCTATGGCCTCAGTGACAGTCCAGGGTATGTACCATGATAGTGCT
GGTAAACTGGTGATTAATCAGATAATCCCTGAAGATGATGCAGTATATCAGTGCATGGCA
GAGAATAGTAGGGGATCTGTTCTGTCCCGGGCTCGACTGATTGTAATTATGTCTGAAGAC
AGACCCAGTGCTCCGCGTTACCTCCGGGCTGAGACAATGTCCAGTTCAGCCATCATTCTG
TCCTGGGAAAGACCTCTCTATAACTCGGACAAAGTCATTGCTTATTCTGTGCATTACACC
AAAGCAGAAGTTCCTTTAAGAGCTCCAGAAATCAGTTTAACAAGTCGAAGTCCCACAGAT
GTTCTTATCACGTGGCTGCCAATTCCAGCCAAATTCTGCAGAGGAAACATAATCCATTAT
AGGCTCTCGTTTCGAGTGAGCACTGAAAGCTCAGTTCAGGTGTTGGAGCTTCCAGGTACC
ACACACGAGTATTTTTTGGAAGGCCTCAAACCAGATAGCCTTTACCTGGTTCGTATAGCT
GCAGCAACTAAAGTGGGATGGGGAGAATCCTCTGCTTGGACATCTCACAGGACGCCGAAA
AGTACAAGTGTCAGAGCCCCAAGATCTCCCGAGCTTCGCCTGGATCCTCTAAACTGCACA
ACCATAGCAGTGAAGTGGCAGCAAGACCCCGAAGACAAAGCAACAATACAGGGTTACAAA
TTGTATTACAAGGAAGAAGGGCAGCAAGAGAGTGGGCCAATCCTACTAGATGTTCAAGAC
TTTGATTATAACATTGGAGGGTTAGACCCAAGAAGAAAATACCATGTGAGATTACTAGCC
TACAACAATTTGGATGAAGGCTATCAAGCAGACCAAACAGTCAGCACTCCTGTATGCGTT
GCCGTTCCAGACCACATGATTCCACCACCTTCACCACCCCATCATCTCTATGCCGAGGCC
AACAGTTCATCTTCCATATACCTGCACTGGGGGCGTCCAGCTTTCTCCACCAGCCACATC
ATTAACTACACTGTCCGCTGCAATCCCGTGGGCCTGCAGAATGCTTCCTTAGTGCTTTAC
CTACAAACGTTAGAACCTCATGTTTTAGTTCAGGATCTTGAACCAAATACCAAGTATGAA
TTTGCTGTGAGGCTGCACGTGGACCAGCTGTCGAGTCCCTGGAGCCCTGTGGTTTACCAC
TCCACCCTCCCGGAAGCACCAACCAGACCCCCAGTGGGAGTCAAGGTGACTTTGATTGAG
GAAAATACAGCTTTGGTCTCTTGGAAGCCCCCTGAAGATATGGATTCTACGGTGACACGT
TACACTATCCTGTATGCATCCAGAAAAGCCTGGCTTGGTGGAGAGTGGCAGATAATGCAT
GTAGAAGGAGCAATAACCATGGCTTTGCTTGAGAATCTTCTGCCTGGAAATATTTACCTT
TTTAAGATATCGGCTGCCAACGAAGTTGGAGAGGGGCCTTTCTCGAATGCTGTGGAACTG
ATGATGCGGCCCAAGGAGACGCTGCAGAAGAGCCTAAAGGCGAATTTGTTAGATTCTACA
AAAAGCGATGATTATTCAGATTATTACCACTTGGACCAGAAATCCATGACAGGCATTGTT
GTTGGCGTGTGCATTGCGCTGACCTGCATTCTCATTTGCATTTTGATATTGATTTACCGT
GGCAAAGCTAGGAAAGCATCGATTGCAAAGATTGCCCAGCAAGGAACCGAGCTACTCCCT
CATGCGGCGGTGTTAATGGCAGATGAGAGTCAAGAGAGGAAGACCTCGAACCAGTCAGGG
GAAAACACCAATGCATTAACGTCGACCATGGAATCAAACCACTTCATAGATGCTAAGGGT
GGCACTGATCTCATCATAAATGGTCAAGGACCAGTGGTGAAGAACAATTCAAGGAAAAAA
TGGATGTTTTTTCTAGACAGGAAGAAAGACCATGAACAGCCTAAAAGAAGAATTGTGAAA
GCCTCCTCTCTATATCACCCTGGTACCACTATTGTAATATGCGAAGACATTTATCCTGCA
TCTCCAGGTTGTCCTGGCACATTTCAAATGAGGAGGAGCAATGCAGCCGATACAGAACAT
TCTGGTAACAGTGAGGAAAGTCATGAAACCAGTGATTCGGGGCATTTTTCTCATGGGTCC
AATGATGAAATTCACCCATACTCAGTTATAAGTACCACACCACCTTTACCCGATTCATTC
ACTAGCCACCACTCTGGGACTAACTCTGCTTTAAGCAATCAATGA
>g417
ATGGTGGAGTATTATGACATCTTGGGAGTTCACAGGAATGCCTCACAAGAGGATATCAAA
AAAGCATACCGCAAGTTGGCTCTGAAGTGGCACCCGGATAAAAATCCAGACAACAAGGAG
GAAGCAGAGCGGCGGTTTAAAGAGGTCGCCGAAGCCTATGAAATCCTGTCAGATTCTAAA
AAGAGAGATATTTACGATAAATATGGAAAAGAAGGATTAACTGGTGGTGGTGGAGGGGGT
GGAAGCCACTATGATCATCCATTTGAGTTTGGATTCACATTCCGAAGCCCCGACGATGTC
TTCAGGGAATTTTTTGGAGGCAGAGATCCATTTTCATTTGATTTATTTGCAGAAGATCCA
TTTGATGACTTCTTCGGTAACAGAAGAGGGCACAGAGGTAGCAGGAATAGACCCGGAGGC
TCTTTTTTCTCTACATTCGGGGGATTCCCTAGCTTTGGTGGTGGCAGCTTCTCTCCATTT
GATACAGGTTTTACTTCTTCGTTTGGTTCTTTCGGGCATGGTGGTTTCACTTCGTTTTCA
TCGTCGTCATTTGGAGGATCCGGGATGGGTAACTTCAAGTCTGTATCGACCTCAACTAAA
ATAATTAACGGCAAGAAAGTCACTACGAAGAGAATTGTGGAGAACGGGCAAGAACGAGTT
GAAATTGAAGAAGACGGTCAGTTAAAATCCTTGACAGTAAATGGTAAGGAGCAGCTGCTA
CGCTTGGATAACAAGTAA
>g419
ATGATGGGGACACCCCAGCATCCAACACATTCTTCCCTGGAGAGGATACACAATCCCCAG
CTTCCATTATCTTTATTGAAAACTGCTCAGAATCACCCTATGTTGGTGGAATTAAAGAAT
GGAGAAACCTACAATGGTCACCTGGTGAGCTGTGACAACTGGATGAACATAAATCTGAGA
GAAGTTATTTGTACCTCTAGGGATGGTGATAAATTCTGGCGGATGCCAGAGTGTTACATA
CGTGGTAGCACTATAAAATACTTGCGCATTCCTGATGAAATCATTGATATGGTGAAGGAG
GAAGTTATGTCCAAGGGCAGAGGTCGTGGAGGGATGCAGCAACAGAAACAGATGAAGGGT
AGAGGCGCTGGAGGTGCTGGACGAGGTGTCTTTGGAGGAAGAGGGAGAGGAATTCCTGGT
GGTGGCAGGGGACAGCAGGAGAAGAAGCCAGGCAGGCAAGCTGGAAAGCAGTAA
>g415
ATGGTGAAAATGAGGGTTGCAATTATTGGAGCAGGAGCCAGTGGTCTGACATCTCTGAAA
TGCTGTCTCGATGAGGGTTTGGAGCCTACCTGCTTTGAAAGAAGTGATGATATTGGTGGG
ATTTGGAGGTACACTCCAAATGTGGAAAATGGAAGAGCCAGTATCTACCAGTCCGTTGTC
AGCAATACCAGTAAAGAACTGATGTGTTACAGTGATTTTCCACACCCAGATAACACCCCC
AACTTCCTCCACAATACTAGAATGCTGGACTATTATCGGAATTATGCAGAAGCATTTGGA
CTACTGAAATATATCAAGTTCAGGACACTCATTCGGAGTGTGAAGAAAACCCCTGACTTC
TCAAGTACAGGCCAGTGGGAAGTGACTACAGAAAAAGATGGAAAGCAAGAGTCAGCCATC
TTTGATGCTGTCATGGTTTGCTCTGGTCACCACACTGAACCAAATTATCCACTGGAGGCT
TTTCCAGGTATAAAAGTTTTTAAAGGTAAATACATCCACAGCCGAGAATACAAGACTGCT
GAAGGATTCAAAGGGAAACGGGTTCTCATAGTAGGAATGGGAAATACAGGGTGCGATATT
GCTGTTGAACTCAGCCGAACTGCTTCTCAGGTGTTTCTTAGCACAAGAAGAGGATCCTGG
GTAATGAGTCGTGTTTTTGAGCAAGGTTACCCTTGGGATATCTGCTTTGACACACGGTTT
CAAAATTGGTTCCGTAATATACTTCCTGTATCTGTTGTTAGCTGGTTAATTGACAGGAAA
GTGAATGGATGGTTTGACCATGCCAACTATGGCCTTCAGCCCTATGACAGAACTCAGTTT
AAAGAGCCCTTGCTAAACGATGAACTGCCAAGTCGGATAACATGTGGATTTGTTTTGGTG
AAGCCAGAGGTGATAGAATTCACTGAGAATTCAGTCAAATTTGATGATGGAACTACAGAA
AACATTGATGTTATCATATTTGCCACGGGGTATAACTTCTCATTTCCCTTTTTGGATGAG
TCTATTATAAAAGTAGAAAACAATAAAACATCTTTGTATAGAAGCATTTTTCCAGCAAGC
TTGGAGAAGCCCACTCTGGGTGTTATTGGGCTTATCCAGCCCCTTGGTCCTATTATGTCA
ACTGCAGAGATCCAAGCTAGATGGGTCACCAGAGTCTTTAAAGGTTTGTGTAAGTTTCCA
TCTTTCAAAGAGGTGATGGCTGATATCGAAAAGAAAAAGCAGATTACCAAAAAAAAGTTT
GGCACATCAAGGGAGAGTGGTTTACAGCTGGATTACATTGAATACCTGGATGAACTAGCA
ACTGACATGGAGGTCAAACCTAATATTTTACAGCTTTTCCCCACAGACCCATTTTTAGCC
CTCGCAGTCCTGTTCGGACCCTGCACACCAGCACAGTACCGTCTTGTTGGACCTGGGAAA
TGGCCACAAGCCAGGAAGCAGATCATGACCACCTGGGATCGCATAATAAAACCAATGAAA
ACTCGAACCGTGAAACAACATGAATCTAAATCTATGGGAATGGCATTTTTCCTTGGAGCT
ATTTGTGCTCTAGTTGTGCTGTTTTCAGTAGTTGTGTACAAATATTGA
>g427
TCGACTCAGATCAAGACATATTCCTGGGACAATGCTCAGGTTTTACTTGTTGGGAACAAA
TGTGACATGGAAGATGAGAGAGTGGTGTCCTCTGAACGTGGGAGACAACTAGCAGAGCAC
TTGGGTTTTGAATTCTTTGAAGCCAGTGCCAAAGACAACATCAACGTGAAGCAGACTTTT
GAACGTCTGGTGGACATTATCTGCGAAAAAATGTCTGAAAGCTTGGACACCGCTGATCCA
GCAGTCACTGGAGCTAAACAAGGACCGCAACTCACCGACCAGCAGGCCCCACCACATCAG
GACTGTGCCTGCTAG
>g423
ATGAAAAATAAATCCCACTCTGTCTCAAGCCGAATGATTTTAGCCGCTCGCAGATCAGTG
GCTGTTAGCAGTCTTGTGGCATGCACCGGCATTGAAAATATCGATGAAGCCATAACCCTG
CTTGAACAGAACAACTGGGATTTAGTAGCTGCCATAAACAGAGTGATTCCGCAGGAAAAT
GGCATATTACAGAGTGAGTTCGGAGGAGAGACCGTACAAGGCCCTGTGTTTGGTCCGGCT
GCCCAACCGGCCACATCTACGGATACAGCGCCTCCCTCCTCATCCTCTGCTTCAGCGTTC
CACCCCGCGTTGTCAGGCCGGCAGGTTGTAGAACGGCTGTCGCGCATGCTGGACTTCAAA
ATAGAGTACAGAGACAAAACTGTGGATGTGGTTTTGGACGACAGCTGTGTGGTTGGGGAT
ATCAAGCAGATCCTGGAAAACGAGCTTCAAATACCGGCATCCAAAATGCTGTTAAAGGGG
TGGAAATCCGGAGAGGTCGAGGACAGCACTGTTTTGAGGAGTCTTCACTTGCCTAAAAAC
AATAACCTTTATGTCCTCACTCCAGAGTTACCAGTTCCTTCTATATCTAGCCAGTCCTGG
AATAAAGCAATAGACGGCGTGGAGGATCCTGCATGCGAGAGCCTTGTTGGACTGAATAGA
ATTAAGCGGCCAGTTGTAGTTGGGTCCAGGTTTCGGTAA
>g425
ATGTGGTCCTCCTACGAGTTCCAGAAATATCTGGAGAAAACGGGAGAAGGTCGCGCTTAC
AAGGAGGTGATTGTGCCAGGGATGAAATCTGCCATCATCCATGCTGTTCAAAGTTCCCAG
GATCTGGTGGAGCATCGGAAGAACAGCTTTGAGTTATATGGAGCAGATTTCATGTTTGGA
GAGGACTTCAAACCCTGGTTAATTGAGATTAACGCCAGTCCAACCATGGAACCATCAACG
GCAGTGACCACCAGGCTTTGTCCTGCTGTTCAGGAGGACACTCTGAAGGTGGTGTTAGAT
CGGAGACGTGATCCAAAAGCGGATGTGGGGTCATTCGAGCTCATCTATAAACAGGCTCCT
GTAGATATCCCCCATTACAAAGGAAGAAATATACATGTGGTTGGATCCGCTATGAAGATG
CCACGTACCCCTCCTCAGAGACCTTCCCGTGGCGGCGTTAATTTGGGGATTGCTCAGAGG
ATAAGACAGAGTTCTCCAGCGATGGTGCAGGCAAGAGTCCCAACAGCTCCTTCTCAGGCC
AGGCAAGAACCTAGAATGAGGTCACCGTCAATTGGGTCATCGAACAGGCCAAAGACATCG
GTACTCGGGAGAGAAAACAAAACATTAACTCCGATGCCACCTAAAACACCTAGAATGGAC
CGTAAACAAGAGACAGGACAGGTATACGGTGGTAGATTATACAGGAGAGGAGTATCTGCC
ACCCATGGCCATTTACCAATTGACCTAAAACTGCCCCTGTCTGAGAAGCCGCTACGCCTG
CATCATTCCACCGGACTCAGAGATAGAGGCTGCATGGATGCAAAGAACCCCCGCCTTAAC
TCTAATGTCTTACCGATTCTTGAGAAAAGGGCAACAACAGGTCCCGTTTACCAACAAAAG
GGTCCACACCCCCCGAAGATCCCGTATGCATCAGGTCCGAAAAGTGGCAAACTACCACCT
ATATCCACCTCTAAAAAGAGCCACGGACGAACACCAGCGCATACGCGGAATCCAGTGATC
CCCGAATCCCTCTTTCTGTAA
>g434
ATGCTCAACTCAGTTTTGGTGTCTCATCCATCATACTGTGTATGGGCCCAACCCCAGTAC
ACTGCTACAACCATAAGGCAGCCAGCATCTGCAAAGTGGTACGACAGACGGGACTATGTC
TTTGTTGAATTTTGTGTGGAGGACAGCAAAGATATAAAAATAGACTTTGAGAAAAACAAA
TTAACGTTCAGTTGTCTTGGGGGAGCAGATAGTCTTAAACATTTAAATGAAGTTGAACTT
TTCCAGTCCATTGAGCCCAATCTCAACTGGCTTAGTGTCGATTTCAACAACTGGAAAGAT
TGGGAGGATGATTCTGACGAAGATATGTCAAACTTTGACCGCTTCTCAGAGATGATGAAT
AATATGGGAGGAGATGAGGATGTAGACTTACCAGAAGTAGATGGTGCAGATGATGATTCA
CCTGACAGTGATGATGAAAAAATGCCTGACCTGGAGTAA
>g437
ATGGCGTACAGTCAGGGGGGTGGCAAGAAGAAGGTCTGTTACTATTATAACGGAGACATT
GGAAATTACTACTATGGACAAGGGCACCCTATGAAACCCCACAGGATTCGGATGACCCAC
CATTTACTGTTGAACTATGGCCTTTATCGGAAGATGGAAATATATCGCCCTCACAAGGCA
ACTGCTGAGGAGATGACAAAGTACCACAGTGATGAATATATCAAGTTTCTTCGATCCATA
AGGCCAGACAATATGTCTGAATACAGCAAACAAATGCAAAGATTTAATGTAGGTGAAGAC
TGCCCTGTGTTTGATGGCCTTTTTGAGTTTTGCCAGTTGTCTACTGGGGGTTCTGTAGCT
GGTGCCGTCAAGCTGAATCGCCAGCAGACTGATATGGCTGTTAACTGGGCAGGAGGACTG
CATCATGCTAAGAAGTCAGAAGCATCTGGATTTTGTTACGTTAATGATATTGTGCTTGCG
ATTCTTGAACTTTTGAAGTACCACCAAAGAGTGTTATATATTGATATCGATATCCACCAT
GGCGATGGTGTTGAGGAGGCATTTTACACCACTGACCGT
>g432
ATGGGCAGAAACAAAAAGTTGCCTGAAGACTCAGAGACCCCCAGGGGCAAAGGCAAATCG
TCCTCTACCTCCTTGAGTGAATATTTCCAGACGCCACGAGACCTGTCTACACTGCCTCCT
GAGGGCCTTGAGGTTCCCTCACCTGCGAGCACGATGGGCACGGAAGACAGCAGGCAGAGT
GGAAGTGAAGATGTCCAGGCGACCGTTCACCGTCTGTTTTCCTCGGCCCCGTGGAAGGAA
GACTTCAGTACCCTTATTACGGAACTTAAACACGTGGTAAAGGAAGAAGTGGCGTCGCTA
CGGGCAGACTTATTGGGCCCTGACAAGCGCCTTACCGTCCTGGAACAGGAGTCTACACGT
ATAATTCAACGAGATGAATCGCCAATGGAGACAGAGATTGTAGGCCTTAGGCAGAGTCGA
AGCCAGTGCTTGCAACAAGGAGATTTTGAGATGTCCGACGTGTTCTATTTCTCCAAGAAA
GGGTTTGAAGCTATTGTTGAAGATGAGGTCACTCAACGCTTTTCATCTGAGGAGTTGATA
TCATGGAATCTACTCACTAGGACTAACTACAACTTCCAGTATGTCAGCTGGAGGGTCACA
CTGATCTGGGCAGTGGGAATATTTGTGCGATACTGCATTCTTCTTCCCCTCCGTGTTACC
TTGGCTACTATTGGCATCAGCTGGCTGGTGATAGGAGCTACTCTGGTTGGACAGCTGCCA
AACAGCAGTGTGAAAAGCTGGCTTAGTGAAAAGGTTCACCTGGTTTGTTGCCGGATTTGT
GCACGTGCTCTCTCCAGTGCTATCCGGTACCATAACAAAGAAAACAGACCAAAAAAAGGA
GGGATCTGTGTTGCGAACCATACCTCTCCAATAGATATCATCATTCTGGCCAATGATGGT
TGCTATGCTATGGTCGGGCAGATTCATGGAGGACTCATGGGAGTTATCCAACGAGCAATG
GTCAGGGCTTGCCCACATGTGTGGTTTGAACGTTCTGAAATGAAAGACCGCCACCTAGTG
GCAAAAAGGCTTAGAGAGCATGTATTTGACAAAACAAAACTGCCCATTCTGATTTTCCCA
GAAGGAACTTGTATCAATAACACGTCTGTGATGATGTTCAAAAAGGGCAGTTTTGAAATC
GGAGGGACCATATATCCAGTGGCTATTAAGTACGATCCTCGATTTGGTGATGCTTTTTGG
AACAGCAGTAAGAACTCTATGGTGAGCTATCTTCTGAGGATGATGACAAGCTGGGCCCTC
AAGTGCAAGGTTTGGTACCTGCCTCCCATGACTAGACAGGAGGGAGAAGACGCTGTTCAG
TTTGCCAACAGAGTCAAGTCTGCCATTGCCAAGCAGGGAGGACTAGTTGAACTTTCCTGG
GATGGAGGCCTTAAAAGAGACAGAGTCAAAGAATCATTCAAACAAGAACAGCAGAAAAAT
TACAGCAAGATAATTGTGGGTGATAATATGACGTTCCGTGGTACAGCCAATTGA
>g428
ATGCAGGTCTACAAGGGGAAAGGTTGGTCCCTAGCAGAAGATCACATTAACTTTACTATT
GGCCGGCAGTCATATACTCTCCATCAGCTAGAAAATGCGGCCTCTGCGTTCAGGCATATT
TTAATTAACGACAGCAAGCAGCCTGCATCACAGCAAGGAGCCTTTCTTCGGGAGTACCTG
TATGTCTATAAGAATGTATGTCCACAATCTCCTGAGAGCCCTTTACCTCAGCTCCCTTTG
CCATATATCAATAGCTCAGCTACTCGAGTCTTCTTTGGGCATGATAGGCGGCCAGCTGAA
GGTGAGAAGCAAGCTGCCACGCATGTAAGCCTTGACCAAGAATATGATGGGGAATCAACA
CAACAATGGAAGGAGTTGGAGGAACTTGTCGTATCTGTAGTTAATAGAGGAGTCCTGCCT
CCGAATTTTCAAACAACACAGTATTGTTTAGGTAGCAACTCGGACAACTCCAAATTTCCT
CTAGCTGTTGTACAAGAGCCAATAACTGTGGAGGTGTCCTTCAAGAATCCTCTTAAGGTT
CCACTTTTGTTAACTGATTTATCTCTGTTGTGGAAATTCCAGCCAAGCGAGATTATTCAA
AATTCTGTTGGAGAGCCAAAAGAACCCATCACCAATGATTTGAGCACAAAGGGAAAATGT
GTCGGTGATGTCATTGGAACTGAAGAAATAAATGAATTTTTAATTAACAGTGAAGAAACA
AAAATTGCAAGACTGAAATTATTTCCCTTCCAAAGTGGGGAGCTGCATATTCTGGGAATT
GTCTATAATCTTAGCACTACTCCGTATATTGGGACAGTGGATGGACCAGCCAGCAGTTTA
CCAGCGGGTAAATTTACATCAAATGGAGTTTCAGTTAGAGGTCGTCAAGATCTGGAAATA
CAAGGTCCTCGCCTAAATGGTACAAAAGAGGAAAAAACATCTATTCAGTATGGACCCGAT
CGCCGACTGGATCCAATAATTGTTCCACAGATGCCTTTGTTGGAGGTGTACTTCATTAAC
TTTCCAACTGGATTGCTTTGTGGAGAAATCAGAAAAGCGCACGTTGAATTTGTAAATGTG
AGCAATTGTCCTCTTACGGGACTAAGGGTGGTTTCCAAAAGACCTGAGTTTTTTACGTTT
GGCAGCAATACGGCAGCACTGACGCCACTAAGTCCAGCAGCTTCGATGAACTGCAGCGCT
TATAAGACTGTTGTTACCGATTCTACCTCTGGCTGCTCAATGTTAACCTCATCTGCTGCT
CCAGTAGACTTTGGTGTTGGTGGTGAAAGCCAACCGGAGGTTATTGATATTCCTCTAACA
GACTCGGTCCTTGCCCCTGGTGCATCAGTCCAACTTCCTTTGTGGTTACGTGGCCCAGAT
GAAGAGGGAGTTCATGAGATCAATTTTGTGTTCTATTATGAAAGCTTAGAAAAACAGTTG
AGAATGCGACATAGGGTCCTAAGACACACCGCAGTGATATGTACAAGTAAGTCGCTGAAT
GTCCGGGCCTCAGTCTCCAGAAGTAATACGCTTGAGGATGAAGAAAGCAAAGGTGGAAAT
ATGCTTGTGTTTGTAGACGTGGAAAACACGAACACAAGTGAAGCAGGTGTGAAAGAATTT
CATATTGTTCAAGTATCCAGTAGCAGCAAGAACTGGAAGCTGCAGAAGTCTGTGAATCCC
ACTAAAAATAAAGATGCTGAACCGTCATCAGAAAGATACACATTTGGTGACATCATTTTG
GGAAATGAACAGATAATAAGCTCGACCACTCCATGTGCGGACTTTTTCTTTCGAAGCTCG
CTATCCACACGATGTAAGAAAAGTCCGCCGGCAGCCACAGCTGCATCTGGGAAGCCAACA
CACAATGATGCTGTTCGTTTAATACAGAAGTGCAGTGAAGTTAACCTAAATATCATTGTA
TTGTGGAAGGCATATGTTGTTGAAGATAACAAGCAGCTGATTTTGGAAGGCCAGCATCAT
GTGACACTTCACACAGTTGGGATGGAGGCTCTGTCTTCTCCCCAAAAGCAGGAGCAACCA
GAAATGGTTCTGTTGAAGTTTAACAGGCCAGAAAGTACTGCTGTAACCACAAAGCCGTCC
ACAGAACAACTCTCAAATCTAATTAAAACCAGCCTTCACTACCCAGAATCTTTTAGTCAT
CCATTCCATCAGAAAAGCCTTTGTATAGTTCCAGTTACTCTTGTGCTCTCCAATAGTTCT
CAGGCAGATGTTGATATAATAGTTGATCTCAGGCATAAGACAACAAGCCCTGAATCCCTA
GAAATCCATGGTTCCTTCACTTGGCTTGGGCAAACCCAGTATAAAAGCCAGCTGAAAAGC
CATCAAGTCTTCAGTCTGCAGCTTAAGGCTTGTTTCATTCATACAGGAATCTACAACCTC
GGGACTCCTAGGGTGTTTGCCAAGCTTGCGAACCAAGTCACTCTGTTTGAAACCAATCAG
CAGAGCTCCATGCCAGCACTGATTGTTATTAATAACGCTTGA
>g435
ATGTTAGGAGCTGTGGGACGCTGCTCCGCTGGGGCTTTACGGGCTCTGAAACCAGCTTCC
AGCCCCGTTCAACTGGGCCAGAACCTGCTTAGGAGTTCTCCAGCCGCATTACACTCTCGC
AGAGACTATGCAGCACAGACGGCAGCAGCTGCCAAGCCTGGCGTTGCCACAGGACGCATA
GTGGCAGTTATTGGTGCTGTTGTGGATGTCCAGTTCGATGAAGGTTTACCACCCATCCTG
AATGCTCTGGAGGTTCAGGGCAGGGACACCAGGCTGGTACTGGAAGTTGCTCAGCATTTG
GGTGAGAGTACAGTCCGTACCATTGCTATGGATGGTACTGAGGGCTTGGTAAGAGGACAG
AAAGTGCTTGATGCTGGCACACCAATCAGAATTCCTGTTGGCCCTGAGACCCTGGGAAGA
ATTATGAATGTCATTGGTGAACCCATTGATGAAAGAGGCCCTATTACAACAAAGCAATTT
GCTGCAATCCATGCTGAGGCTCCAGAGTTTGTGGAAATGAGTGTTGAGCAGGAGATTCTG
GTTACTGGCATCAAAGTGGTAGATCTGTTGGCCCCATATGCTAAAGGAGGAAAAATTGGA
CTCTTTGGTGGAGCTGGTGTTGGCAAAACTGTACTGATTATGGAACTTATTAACAATGTA
GCCAAAGCCCACGGTGGTTACTCGGTGTTTGCTGGTGTAGGAGAGCGTACCCGTGAAGGC
AATGACTTGTACCATGAAATGATTGAGTCTGGTGTCATCAACCTGAAGGACACCACTTCA
AAGGTAGCATTGGTGTATGGACAGATGAATGAACCACCTGGTGCCAGGGCTCGTGTAGCT
TTGACTGGACTAACTGTTGCTGAGTACTTCAGAGACCAGGAGGGACAAGATGTGCTGCTT
TTCATTGACAACATCTTCAGGTTCACCCAGGCTGGATCAGAGGTGTCTGCCTTGCTTGGG
CGTATACCATCAGCTGTCGGTTACCAACCAACTCTGGCTACTGATATGGGTACCATGCAG
GAGAGAATCACTACCACCAAGAAGGGGTCTATTACATCTGTGCAGGCTATCTATGTGCCT
GCTGATGATTTGACTGACCCTGCTCCTGCCACCACCTTCGCTCACTTGGATGCAACTACT
GTCCTGTCTCGTGCTATTGCAGAGTTGGGTATCTATCCAGCTGTAGATCCCCTGGATTCT
ACCTCCCGTATCATGGATCCCAACGTTGTTGGTCAGGAGCATTATGATGTGGCTCGTGGA
GTACAGAAAATTCTGCAGGATTATAAGTCTTTGCAAGATATTATTGCCATCTTGGGTATG
GATGAATTGTCTGAAGAAGACAAACTGACTGTGGCCCGCGCTAGGAAGATCCAGCGTTTC
CTCTCTCAGCCATTCCAAGTTGCTGAAGTCTTCACAGGGCACTTGGGTAAACTAGTCCCA
CTGAAAGATACCATCAAGGGATTCCAGCAGATCCTTCAAGGAGAGTACGATCACCTCCCA
GAGCAGGCTTTCTACATGGTTGGACCTATTGAAGAAGCTGTAACAAAGGCTGAGAAACTT
GCAGAAGAGCACTCTTAA
>g403
ATGCAGTGGGCCCAACAACAGAAATTACCGTTACATCATGCTGTGATGATATGCCAAGTA
CCTTCTGGTAGTGAGATTAAGCACGTCACTAAGTGCCTAGAGATTGTATTGGGAATAGAG
ATGGCGACTATCAGAGATGTCCTGCAGGATTCAGACAGTCAAACCTACATGTTAGCGTAT
TCCCATACAGATCTGAGAGGCCAACAGAGGCCTACAGCCCTTCACCTTCTGGGAGCAACA
CTGAAAGGATGCCCTTTAGTGTACACTCTTCCTGACAAGGAGGAAGTTATTACACCACAG
AGACCCTCCAGTTTAGGGCTAAGAGACTTTGACACATCACGTTATTCACAGTTTTTGACT
CCTGTGTCAGAGAAACCCACTTGGAGATTACCGTTTACACCATTAGAGACTGGGGCCATT
CCCAAACAAACTATTCGTTCTTTCAGAGAGCAAGGGACAACTATGCCCAAGACCCCAGGT
CCCGTGGTTTCCTCAACCTTACTGCAGCCAGGTGATCCTGCATTGAATACCACAAGTTCA
AGTGGCCTACCTGAAATACTGGAAAAACTCTCAGAGGCCATAGTAACGGCAACCCACACC
CACAGTTACCGTAAGCTAAAGGTGTTTTCCGGTAATCAGCCTGTTCCAGCGGGAGAGGAA
ACTTTTGAGGCCTGGAAAGATAATGCCGTACAGTTGTTAGAAGAATGGTCCTGTACGGAT
ACCATAAAGAAACAACGGTTAGTAGAGAGTCTTCGTTTTCCAGCTACAGATATGATAAGA
CTGTTCAGGGGAGTGAATGGACAAGCTACAGCCCATGATTATCTGCAGGTCTTGGAGGAC
GCTTATGGAAGATCAGAGGACACTGATGATCTATTAGTTAAGTTCCTAGCCACCAAGCAA
AAGGAGCATGAGAAAGCTTCTGACTATATCAATCGATTACAGTTGTCACTAGGGAAACTA
TTTCATAAAGGAGCGGTCACGGCATCTGAGTTGGATACACGGCTATCCAAGCAAATTCAG
AAGGGAGGCCTTCGCAATGATCCGGTCCTGATCATGTTAAGAGTCAAGTTGGATGATCAA
GTCTTGTCTTATTCTACACTGATAAACAAAGCAAAAAGACTGGAGGACCAAATGTCCCCA
CTTCCCTCACGGAAAGAGAAAGAGGATGAGGAACTTTCAGTGCTTAAAAGGAAGGTAGCT
GAATTGGAGTTATTGTCCAAATCCTCACTAAGAAGAACAGATCCTCCCACTAGAAGGGAA
TACCACAGGGAAACCCCAGGGAGGTTGTCCCATGAGGATTCATTTGACAAAAGGATTTGC
TTTAAGTGTGGAAAATCAGGGCATTTCAAGCGGGAGTGTCCCACTAATTCACCAGAGACT
GATGTTGATGTGCTAGCTATCGAGCTGGAGGAGGCCCAAATTACCAGTTCTTCCAAGAAA
AGAAAGAAAAGACACACACAAAGCTTACCTGTGGGAGCTAAGATTGGGCCTAAATCCTTG
ATACACTTACAAGTGGAGGGAATTGATGCTTCAGCCTTGCTAGATACCGGTTCCCAAGTT
ACCATTATTTATAGAGACTTCTATGATCGTCACCTAAAACATATCCCTATGGAACCTGCA
GGGGAGTTGCAATTATGGGGAGTGGGAGCTCAGGCCCAGCCTGTAGAGGGATGCATAAGA
GTGACTATAACCATCCCCCAGCTAAACACAGGAATGATCTGCCCTATGGAATTGGAAGCT
CTCATATGTCCTGCGGCTAAGAAAGTATGTGCCCCAATAATCTTGGGCACCAATGCAAGG
ATGGTACAGGACGTATTTAGAGCCTACCTTACAGAAGTGGGTGATGTATCTCTAGCCCGA
CTGATGGAGGTCAACCCTGTACTAGGGAAGGAGTGCCATCGACTAGCCCTAGAATCTAAA
CCAGGGTCTTGCCACTATGCAGGGAGAGACACTGTATTCATTAAGCCAGGTGAGACCAGG
ACTCTACGAGCCATAGCCTCCATGCACCGTGAAATGTTGGGAGGAACCGGACAATACCTT
GTTGAATCCTTACCTGAAGAGGATAAAAAGAAGGGGTGGACTCTAATACCTGAGGTGAAA
GACTGGCGGACCCACTGGTGTCAAAGTTTTCCTGTAATGATACAGAATCTAACACCTACA
GAGGTCAGAATCGATCGTCACCAGGAAATCGGTGTGATTTATCTGTTAGATCAAGTCTCT
TCCGTCATGTCTGTGAAGACAGAACAGGGGGGTGATCTTGAAGCACCTATAGCTTTTGAC
TTGGAAGATTCTCCCCTACCACAGAAGTGGAAAGATAGCCTTCGAGCTAAACTAGCTACT
CGAGAGAAAGTATTCTCCAGGGAAGAAATGGATGTGGGATGTGCAAAGAGTGCTACACAT
GCTATCAGACTTTCCGACCCAGCCCCTTTCCGAGAGAGGTCAAGGAGGATTCCCCCTCGA
GACGTGGAGGATGTCCGAGATATACTCCAACAGATGAAAGGAGCTGGTATTATTAAAGAG
TCCAGGAGCCCATATGCTTCGCCTATAGTGGTAGTAAGGAAAAAGAATGGCACCGTCCGG
CTATGCATAGACTACCGCACTCTGAACAAAAGGACTGTGCCAGATCAATACACACTACCA
CGGATAGAGGATCTGCTAAATGCCCTTTCTGGAAGCCGGTGGTTTAGCGTACTTGACCTG
AGGTCTGGGTATTATCAGGTACCCATGAAGAAGGAAGATCAGGAGAAGACAGCCTTCATC
TGTCCCTTAGGATTCTACCAGTTCACCAGGATGCCCCAAGGGGTCACAGGAGCTCCTGCC
ACTTTTCAGAGGTTGATGGAGAAGACTGTGGGGGATATGAATCCCAAAGAGTGCCTGGTG
TACCTAGATGACCTCATTGTGTTCGGCAGGACACCCGAAGAACATGAACAGCGACTGCTG
AAGGTATTGGACCGACTCCAAGCAGAGGGGCTGAAATTGTCCATAGACAAATGTCGGTTT
GCTCGGAATTCTGTCACATATGTAGGGCATATTGTCTCTGCAGAGGGAATAGCCACTGAC
CCAGACAAAATTGAAGCGGTATTGAACTGGCCTAGACCGAATAATATCAGTGACTTGCGG
TCATTCCTTGGATTCTGTGGCTACTACCGAAGGTTTGTGAAAGACTACTCGAAGATTGCT
CGAGAGCTGCATAACCTGTTAAAGACGACTTCCGACATAGAGGGTACTAAGGCACCACGT
CCTAAAGATTTCTTTGGAGAGAAATGGACTTCAGGATGTGAAGAAGCCTTCTTAGCCTTG
AAGAAAAGACTTACAGAGGCCCCAGTATTAGCGTATGCAGACCCTGAAAAACCATATGTT
CTCCATGTTGATGCCAGTATGGAAGGCCTAGGGGGCGTACTACATCAAAGTTATCCAGAA
GGATTAAGACCCGTGGCCTACATAAGTAGAAGTCTGACGGGAGCAGAGAAGAATTATCCG
GTCCACAAACTAGAATTCCTGGCACTTAAGTGGGCCATCGTGGACAAGTTACATGACTAT
TTATACGGAGCAAAATTTGAAGTAAGAACGGATAACAATCCACTTACCTACATTCAAACC
ACGGCTAAACTTGATGCCACAGGGCATAGGTGGCTGGCTGCATTGTCAAACTACCATTTC
AGCCTGAAATATAAGCCAGGCCCTAAGAATGTCAGTGCGGATGCCCTGTCCCGCAGACCC
GGACTCCCGCCTCACCAAGAAAAGGAGGAATGGGAAGAAATCCCTGGACCTGGGGTAGGA
GCTTTCTGTCAGACATATGTAGTGGCCCAGAGGCAAGATGAGTTCTCTGACCTTAGAGGG
ATAGACTCCATCAGTCACTCTCCAGGAGCAGTACCAGAGATCTTCTGCACTCCAGTCATG
CTCCAACAGTGGTCTAGCATAACCACTGAAGACAAGAGGAAAGCCCAGTCACAGGACTGG
TATATAGGGACAGTCCTCAAGGCAATGAGAGCAAAGAACCCTAAATTATTGACTTCCCTC
CCCATTGGTCAAAGAGACGTATACCGGCGAGAGTGGAATAAGCTATGTCTGGAGGATGGA
ATCCTGTACAGAATTATAAAATACCATGACCACCCTGGTCGAAAGCAGCTGGTATTACCC
CATAGATACAGAGGAATGGTTATGAGAGCCCTCCATGACCAACATGGACATCTTGGGATA
GACAAGACCTACGGTCTAGTACAAGACCGGTTCTATTGGCCTCGCATGAGGGAGCATGTT
GAACAACATGTAAAGACCTGCAGGAGGTGTATTCAGAGAAAGACTTTGCCTGTGAGAGCT
GCACCCATGGGTCACCTGAGAAGTACAGGACCACTGGATCTTGTGTGCATGGACTATCTA
TGTATTGAAAATGATACCGCTGGGATCGGAAATGTTCTGGTTGTAACAGATCATTTTACC
AGATATGCTCAGGCATTTCCTACTAAAGACCAGAAGGCTGTAACTGTCGCCAAGGTTCTC
TGGCAGAAGTATTTCATGCACTATGGTCTACCCAATCGAATACACTCTGATCAAGGTAGA
GACTTTGAGAGTAAGTTAATCAAAGAACTGATGGATATGCTGCAAATTCAAAAGACCCGA
ACGACACCCTACCATCCAGAGGGTGATGCTCAGCCTGAGCGTTTCAATAGGACCCTCTTA
GATATGCTTGGAACTTTGAAGCAAATGGAGAAGCGGTCCTGGAGTAAGCATGTGGAAGCC
ATGGTCCACGCATATAACTGCACAAGGCATGAGTCTACAGGATTCTCACCCTACTTTCTG
ATGTTTGGAAGAGAAGCCAGACTACCAATAGATGTTCGGTTGGGTGTTTCCCCAGATGGG
ACAAATTCAGGCTCTCACTTCCAGTATGTGAGGACCCTCAAACAGAATCTTCACAGGGCC
TATGAGTTGGCCACCCAAGCTACAGCAAAACTAGAGGAACGGAACAAAAGAAGGTATGAT
ACCAAAGTGAAATATCGGGAAATCCAAGCAGGAGATAAAGTTCTTCTCCGGAATCTAGGA
GTACCTGGAAAACACAAACTGGCTGACAGATGGAAAGATACCCTATTCGAAGTTGTGTCT
AAGCTAAAGGGGCTGCCAGTGTATAACATCAAAGGGCCAGAAGGCCGAATAAAGGCTTGG
CATAGGAACCATCTACTACCAGTAGCGTATACTGATGAAGAGGAAGGGAGTAGTGAAGAA
CTAGGGGAAAGCATAACAGAAAGCCCTCAAAGTGGGACAGAGGAGACCCCAGAAGCTCCA
AGTGCTGAGGATCAGTGGTGGTCTTCTCCTGCGGAGGAAACGCAGCAATTGCCTCCTTCT
ATCCCTGTGGTTCCTCAAAGTGTTAGAACCCCTCCTGTGTCACACAGTTCTCCAAATTTG
AATCCAGAAAGCCTGTGCTTCGTGCCTGGGACCCCCTTTAGAGACTCTAGTTCTATGGGA
GAGCCAGGGCCTCAAGCCACTGGTGACCTCCCCAACCGCAGAGCAGGAGCCGAAGCTTCC
CAGGCACGGTCAGAAGATCCCCTTCGTCAACGAGAACCCAGACACAGCACCAGGGTACGG
CAGCCTCCTAGAGCCTTGGTTTACGATAGTGTAGGAGATCCCAGTTACGCGCCACTGACA
CAGGTAGCATCTAAAATGACCACTTTCCTACATGCTCTAGCGGATGTAGTAGATGTTAAT
CCTTCCTTGTTTTAG
>g440
GTGAGCGTCTACCTGGGGAAGAGGGACTACATTGATCATGTTGAATCTGTGGATCCTGTA
GACGGGGTTGTCCTAGTGGATCCTGACCTGCTCAAAGGGAAAAAAGTATATGTCACTTTG
ACCTGTGCATTCCGCTACGGTCAGGAAGATATCGATGTTATTGGCCTGACCTTTCGCAAA
GACCTTTACTTTGCTCGAACCCAGGTTTATCCTCCTGTGGAAGACCCAAAAACTCTCACC
AAGGTCCAGGAGAGGCTAATGAGGAAGCTGGGAAACAATGCCTATCCCTTCGTGATTGCA
TTCCCTGATTATCTTCCATGCTCAGTATGTCTCCAGCCATCTCCTAACGATGTGGGAAAG
GCCTGCGGTGTGGATTTTGAAATTAAAGCATTTTCTGCAAGCAACTTGGAAGACAGAGTT
CATAAAAAAAACTCTGTACGTCTGATGATCCGAAAGATCCAGTATGCCCCTGACCAGCCA
GGACCTAAACCCCGAGCCGAGACATCATGGCAGTTTTTTATGTCAGACAAACCTCTTCAT
CTCACAGCCTCACTGACTAAGGAGGTCTTTTATCATGGGGAACCAATATCAGTAGCAGTC
ACTGTGACCAACAACTCGGAGAAGACCGTCAAGAAAATATCCACATCTGTGGAGCAAGTT
ACCAACGTTGTCCTGTATTCCAGTGACTATTACACCAAGACTGTGGCTTTGGATGAGACC
GAGGAAAAAGTGCAGCCCAAAGGCTCATACAGTCACACCTACTCTCTGCTTCCTCTTCTG
GCCTATAACCGAGAGAAACGAGAAATTGCCCTCGATGGGAAACTCAAACACGAGGACACC
AACCTGGCTTCCAGTACCCTGCTGAAGGAGGGCCTCGATCGTACAGTCATGGGAATCCTG
GTCGATTACAAGATCAAGGTCACAATCACTGTTTCTGGTGAGCAGGATGATGACATGGTT
TTCGAAGAATTTGCCCGTGACCCGCTTAAGGATGAATTGCAAGGAGAAGAAAAGGAGGAA
GAGGAAGAAGATGAGAAATGA
>g438
ATGTGCTGCTATTCGTCTCTCTCACGAGTCCCATTATGGAGAAGCAGACTTTTAGCTCCC
GGTTATGGCTACCAGATAAAACGAAACTTCTGGGTGGCTAGGCTGGCATCTCGGATTTTA
AAACTCCGTTATCTTGTCCTGGGATCTGCTGTTGGTGGTGGATACACAGCCAAAAAGACC
TATGATCAGTGGAGGGATATGTTTCCAGACCTTAGTGAATACAAATGGATTGTGCCTGAT
TTTATTTGGGAATTGGATGAACATATTGATTTTGAAAAATTTAGCAAAGCCCTTCCAGAT
TCTGAAGAGCTGGCAAAACTACTGCCTGACTTTGATAAACTTGGAGAGCGTTTCAGTTTT
TTAAAAGGATGGCTTTCATCAGGTCACAATTTGGTTAGTGAAGCCATAGGATCTTCTGAT
CTGCTTCTGTTGTTAGGTTCAGGAGGGGAAACTGCCTTCAAAGCCACAGACAGCCACGGT
TATGATAATTCTGATAAACAGTACAAGAAGACATCAGACAAAGAGAAAGTAGACCAACTG
CAAGAAGAGCTTCTGAGAACACAAATGAAGTACCAGCGGATTCTGGAGCGGCTGGAGAAA
GAAAACAAAGACCTGAGGAAGCTGGTGCTGCAGAAAGATGACAAAGGAATTCATCAAAGG
AAGTTGAAGAAATCCTTGATTGATATGTACTCAGAGGTGTTGGACATATTATCTGATTAT
GATGCTAACTACAACACCCAAGACCATTTGCCCAGGGTGATTGTAGTTGGCGACCAAAGT
GCAGGAAAAACCAGCGTCCTGGAGATGATTGCACAAGCCCGGATCTTCCCCCGTGGTTCT
GGAGAGATGATGACCCGCTCTCCAGTAAAGGTTACATTAAGCGAAGGCCCTCACCATGTT
GCTGTGTTTAAAGACAGTTCGCGAGAGTTTGATCTCACCAAGGAGGCAGATCTGGCGGCA
TTGAGGGATGAAATAGAGGTCCGCATGAGGAAGAGTGTAAAGAATGGACAAACCGTTAGT
CCGGAGACAATCTCTTTAAGTGTGAAGGGTCCTGGCATTCAGAGGATGGTCCTTGTGGAT
CTACCAGGAGTCATCAGTACTGTGACTTCGGGGATGGCTCCAGATACCAAGGAGACTATA
TTCAACATCAGCAGGGCTTATATGCAGAATCCAAATGCCATTATTCTCTGCATTCAAGAC
GGGTCCGTGGATGCAGAGCGGAGTATCGTAACTGATCTCGTGAGCCAGATGGATCCACAG
GGCAGACGCACCATTTTTGTTTTAACAAAAGTAGACCTTGCGGAGAAGAATGTGGCTAGT
CCGAACCGGATTCAGCAGATCATTGAAGGCAAACTATTTCCGATGAAAGCCCTTGGGTAC
TTTGCCGTGGTTACAGGGAAAGGCAACAGCAATGAAAGCATCGATGCCATAAAGGATTAT
GAAGAGGATTTTTTTCAAGGATCATCACTTTTGAAGTAG
>g447
ATGCTGTCCCTCCTGTCTCGACTCCTGGACTGGTTCCGCTCTCTCTTCTGGAAGGAGGAG
ATGGAGCTCACCCTGGTCGGGCTGCAGCACTCGGGCAAGACCACGTTTGTCAATGTCATA
GCGTCAGGTCAATTCAGCGAGGATATGATTCCCACCGTAGGATTCAACATGCGCAAAGTC
ACCAAAGGCAACGTTACAATAAAGATATGGGATATTGGCGGCCAGCCGCGTTTCCGCAGC
ATGTGGGAGCGTTATTGTCGTGGGGTGAATGCAATAGTGTACATGGTTGATGCTGCTGAC
AGAGAGAAGATTGAAGCGTCTCGGAATGAACTGCATAATCTCCTGGACAAACCCCAGTTA
CAGGGTATTCCGGTCTTGGTGCTTGGGAATAAGAGAGATCTTGCCAGCGCTCTGGATGAG
AAGCAGCTGATTGAAAAAATGAACCTTTCGTCGATACAGGACAGGGAAATCTGCTGCTAT
TCCATTTCGTGTAAAGAAAAGGATAACATAGATATCACTCTGCAGTGGCTCATCCAGCAT
TCCAAGTCACGTCGCAGCTAA
>g442
CTGTTAAATGCCTCTGAGGAAAAACACAGCCTGATAACACAGCCTGACAAGGTTACATCC
AAGGATGATCAGGATGCCATTGTTAAAGGTTGGCTGCAGCGTGAAGTTAGCAGTGGGGTG
AAAACTCCCTGGTCCAAAATGAAGAAGTTCTGGTTTGTCTTGACTCCAGACTCCTTGGAT
TATTACAGCGGCAATGAGAAGGCCAGCAAACGCTTGGGGACCTTGGTGCTTACAAGCCTG
TGCTCTGTGATATGGCCGTGTAAACAGAGCTACAAGGAGACAGGTTACTGGAATGTCACT
GTGTACGGAAGGAAACATTGCTTCCGATTATACACAGAGCACCTGAATGAAGCTGTACAT
TGGGTGTGTGCCATCCAGAAAGTAATAGACAGCAAAGCACCCTTGGAGACGCCTACTCAA
TTACTCATTAAGGACATTGATGTAACTCATAATGTCAAAGGTTATACAGCTCTCCGGGAT
GAAGCGGTCAAGATCTTCAATTCTCTCCAGCAGCTGGAGAATGTGAGAGACCCTGTGCCC
CTCATGCAAGGTGTTCTGCAGACATGCCTGGATCTACAACCTCTTAGAGATGAGGTTTAC
TGTCAAGTTATCAAGCAAACCACGGACCCTCCTGAGCCTGGGAGTTTAACTGACCTAAGA
TATTGGCAGCTACTTACCTGCATGAGCTGCACGTACTTACCCAGTCCTTCAGTACTTAAG
TTCCTCCAAACACATTTACAGAGAACTTGTGACCGGTACCCAAACACGGAGATGGAAAAG
TATGCTACATTTATTGTATCGTCTCTAGAAAAAACAAAGCAGCGGGAATTTGTTCCGTCT
TATGAGGAGATCACAGTACTGATAAACAGGCAAGAGCTGACATGTACAGTATACTACCCC
GGAGCAGGAGCCTGCAAAGTGTCTATTACTTCCCACACCACAGCTGAAGAGTTGGTCCAG
GAGCTGATTGCAAAGCTTAACTTGAGTACAAGTAACAACATCTATGCCCTGTATGAGAAG
AACAACCAATACGAGCAAGCGCTCAGTAAAGCCTGCATTGTGGCAGACACGCTCACTAGC
CTGTCCTTCAAGGAGAAAGGATTTGAATCACGATGGAGGCTTTACTTTAAGGTTTACTGC
TACCTTGATACTGAGGATATACCCAAGGACAGCCTTGAATACGCCTTCCTTTTTGAGCAG
GCACATGAGTCTATGATCCGTGGATACCTACCCACCAATGAAGACACTTTGCAGTCATTG
GCAGCTCTTCGTCTTCAGTTTCTAAATGGTGACTTTTCTCCCCATGCACCTTTCCCTCGA
CTTGAAGAACTATTCCCCATTTACATACTTCACTCTCGGATATTGGCCTCCAGTAAACTA
TCTGTAAATTGCAAGACATCCTGCCCTGGATTTCATAAAGGTCTTTTCTCGGGTGCTCTT
CCAAATGGGTTGTGGAACAACTCTTCAGTGAAGCAGAAGGCAGAAGAAAGCCAAAAGTTC
AAGGGGCGTATGAAAGAGGAGGGAGCCAATATGATGTCTGCAATTGTAGAGAAATGGAAA
CTCCTGCAGAGTATGGAGAGGACAGAGGTCATGACCACATATCTGTCTATTGTGAAGCAG
TGGTCAGGTTTTGGCTCCACCTTGTTTGATATAGACTTCTACATGAGTTCATCTGGGAGC
TTTTCTCAGCGACTATGGCTTGGCGTTAGCGCCACTTCTCTGTGCCTCTACAAGCAAGGA
GAGATGGAACCATTTGAAAATATAACGTATAGTCAGATAACATCCTTTGATGTCTCAGAT
AGTGCCACCTTTAAAGTGACAGTTGGGGACAAGGACATGATATTTGAAACCACTAAGGTG
GACGAGATTACTCATCTAATTAACACATACCTGATGTGCATCACAAATGAGAATTGCTTT
TCTAAGAGTAGTCACAATGTTGCCTCAGACAATCCATGTGAGCCAGTGTGA
>g441
GTTGTGGAGGTCGAGCTTTACAGACACTCCTTTGGAGAAGATGCTCTCTACTCCCAGTCA
TCGAATGAGTCTTGCCAGTCAGATAGTAGTACTCCTTTACCTGCCCTGGTTAAAACCTCT
TCTCCAATCAAAGGCGGGCATGATTCCAATGAGAAGGGTTTTACCATGGCTCCCGAACCA
TCATATTACCCCCATCCTTCGTCACTTGAGCGCACACCAACCAAAATGACCCAGAGGTTC
ACATTTGGAGCTCATGGCAACACTGCTTTCCAGCCGATCACGGCCAGCTGTAAGATTGTG
CCACAGGGGCAGGCGTCTAGCTTGGCAGAGTCGCCTGGGAAATCTTTCCAGCCGATCACA
ATGAGCTGCAAGATTGTGTCAGGGAGTCCCACCAGTAAACACTCCAGTACGTCACAAGCT
GTTAGTGGAACACAATCTCCAGTCCCAAAGGTTCATGGAAGCAATATTACAACCCCAACA
ATAAAGGAGGAGTCCATGTTTGCTGCAATGCCTCCACTCTGTCCTATTGGAAGTCATCCA
AAGGCTCAAAGCCCAAAGACTGTCGCTGGAGGGCTTGGTGCATTTACAAAGGTGATTATA
AAGCAAGAACCGGTTGAACCTTCTCAGCAGCAGGAAAACCCATCGACGTCTCAGCCACCT
ATCCAGCAGATTGTGACAGTGAAGGGTAATCAAATGATTGCTGTGTCTCCGCAGAAAAAC
CTGAGCGCGTCTGAAGGTTCCAAGATTGTCAGCATTCCAGTTGGCTCTGCAGTTCCGGCA
GCCATTAAACCATCTGTAACCATAAGTGGGGGCCAAATTTTGGTTGCCAAAGCGACTCCT
TCCACTGCCAAAGTGGTTGGTCCAAAGCAGATGGTTGCTCAGGGAGTGGCGAAAGCTGTT
GTAAGCGGCGGGAATGTTATAGCCCAGTCTGCGCAGGGCTTATCAAAAACCCAAGTAGCA
ACAGCAACTGTGAAATCTGGATCCCAAGGATCTGTGATGGCGACTCTACAACTACCAGCT
ACAAATATTGCAAACCTTGCCAATCTACCTCCTGGAACCAAACTTTACCTCACAACCAAC
AGCAAGAATCCTTCCGGCAAAGGAAAATTGCTTCTCATACCCCAAGGGGCCATCCTGAGG
GCAGCAAACACGGCTAATATCCAGTCTGGGGTGTCCACCAGTAGTAATGCAACTGGTGCT
GCAGCTACCACCAGTGGATTACCACAGCACCTCACCTACACCTCCTATATCCTGAAGCAG
ACGCCACAGGGAACGTTTTTAGTTGGACAGCCGTCTCAACAGGCATCCGGGAAGCAGGCA
GCCCAGAACGTGGTAGTCCAAGGGAATGTGGCAACGGCTGCCCAGGGTCAGGTCTTAAAA
GTAACCCCTGGACAGAAGACCAGTGCACTTGTGCAGGGAAACAGTGGATCAGCTTCACAG
CCAAAATTAGCAGAAAGTGTGCTAAAATCTCTACCGGTGGCTTCCCAGACACAGAAACCA
GGAACTACTTTACTGAGAGTAGCAGGGGGCATCATAACGGCAGCTGGTTCATCGCTACCG
CCTCTGTCTGTTAAAACTGAGCCCGATACACCTGGTAACACCGACAATGCGCTTGCGTTT
AGCGTTGGAAATGCGCCAGTAAAGACGGAAGAAAATTTGGACGTAGAAACCTGCTCTGTG
AAAACGGAACACGTACAAAACTTCAAACAGCTGCTAACAGCCACCGTGAAGAAGGTCCCG
CTTATAGCTGAGAAAAGTGATGATGGGTATGCTTTCTGTGCAAGCTCGGTGGAACAATAC
TACAGCTGGAACATTGGGAAGAGGAGAGCAGCAGAGTGGCAGCGGGCTGTGACAATGCGA
AAAATGCTGCAAGACGTTATTGAAAGGCAGCCAAAGTTCAGTAACGTCAGCCCACTGAAA
ACCAAGCAGATTGTCCACTGGTGCCGCATCCACGGCTACACTCCTCCTGACCCGGAAACC
ACTGGGGATGATCGAGAGTCAATTGAGGATGTGCTGACTCGTATAGACAATGAGTCGGCC
TTACCCACATCATACTCCTCTGCGGAGACTCTTTGTCGAAAAGTAGAAGAACTAGAGAGG
GTTTTGAAAAAGGAAACCGAAGTCGAAGAAGACGTGGATATTCTGAGTACAGACGAAGAA
CAGAAGCAGCAAAGTGAAAAGGAGAATGAAACGGTCGATGAGATAAAATATTATCTGACG
CCCAGTCCTGCCTGTGAGTTTGTTAGAGACGCAGCACAAGAGATCGGCGTTTCCTTACAA
CCAATCGAAGTGCAAACAAATATTTACGCTTCTCCTGTGGAAGAAATGATTTTAAAGGCT
ACTGAACAGTTTGTTAGTGACATACTGCGCGATGCCTTATCTATTGGATATCAAATGACC
TCTCGCAATCGAGCGCCAAGAGAAATTACGGTTACCAACATCCAGCAAGCAATCTGCAAC
ATTCCGTTATTTGACTTTCTCACCAACCGGCACATGGGTGCTTTAAACGCGGATAACGAT
CTTCCTTTGAAATAA
>g450
ATGTTCAACGCGGGGGAGCTGACGCTCGTGGAGTACGGAAGCAACGAGATTCTGGGCACG
GTGCGCACCGAATTTATGAACCCGCATCTAATCAGCGTCCGGCTCAACGAGAGGAGGGAT
GCAGACGGCAAGAAGCTGGCCTACCTCGTGGACAGGAAGACCATCGCTATAGTGGATCTG
GTGGCCGGTTACAATGTGGGGACGGTCGTCCATGACGCCAAGATTGACTGGATCGAAATG
AATGAAACCGGCCATAAAATGCTGTTTAGAGACAAGAAGCTGCGGCTCGTCCTTTATGAC
ATTGCAAGCGCTCAGAAGACGTCCATCTTGAGCTACTGTTCGTACGTGCAGTGGGTGCCC
GGCAGCGACGTGGTGGTGGCACAAAACCGCAACAACCTGTGCGTCTGGTACAACATCGAT
TCCCCCGAGAGGGTCACCATGTTTCCGCTGAAGGGGGACATTGTGGACCTCGAGAGGAGT
AACGGGAGGACGGACGTGATCGTTGCCGAGGGGGTGAACACCATCTCCTACACGCTGGAC
GAGGGGCTCATAGAGTTCGGGACGGCCGTAGACGACGGAGATTATTACAGGGCAACTGCT
TTCCTGGAGACCCTGGAGATGTCCCCGGAGACCGAAGCCATGTGGAGGAGCCTCAGCAGA
ATGGCGCTGGAGGGCGGACGTCTCCGTGTGGCAGAGAGGTGTTTCTCAGCCCTCGGAGAC
GTGGCAAAGGCCAAATTCCTACGTGAGACGAATGAGCTGGCCCACCGGGCCGCCCTGGAA
CATGGTGGGGAGGGCACAGATCACTACATGGTGCGCGCTCGCCTGGCTATGCTGGAGAAG
AACTACAAGCTGGCGGAGATGATCTACCTGGAGCAG
>g452
ATGAGCCGCACAGTGACTGCAGATGAACTTTGGAAAGGAGTTTTGGCAGATAGTGGAGCA
GGTGCTAGAAAGGGTAGAGGAAAAAGGACAAAGAAGAAACTCAAGAAAGATCTAAATCGT
GGACAAATGATAGGCGAAGGGAGATCTGGAACTCTTTGGCCTGGTTTGAATGCACCTGTA
GTAAAAACCGTAGCAGTCCAGACCATAGGAAAGAGAGACCCGTTGCAGCAGGAGCAAATG
CAAGCTGAGATAATAAGACAAAGAGATGAATGGGATAAGAAGCGGAAGACAAGAGTTAAA
CGAGAAAGAGGCTGGACTGGAAACAGCTGGGGTGGCATCAGTATTGGTTGTCCAGACCCA
GGCCCTAATGGTGAAACATATGAAGATTTTGATTGCAGAGTAATCGAG
>g444
ATGGCTCAGAGAGCGGAGGAGGAGGAAGAGAACGTTGGTCTGAGAAGCAGACGGAGCGGG
ATACGCTCTGGAGCTGCCCGCGAGAGGGAGGAGAAGGTCCGGGCCGTGCAGGAAACCTTA
CTTCAGAGCTTGGGCAGCTACGAGCCTGTAATCGGCTACCTGCAGGCTGTGTTGGTGTGG
GAGAGACCGAGGCACAGCGCCCTGCTCCACCTGGGCCTTAATGGTGCCTTCTGGTTCTTT
GCCCTGACCTCACTTAGGATTATATTTTTGGCTGCTTTTGGATTGATGATGATAATTTGC
GTGGATCAGTGGAAAAACAAAATTTGGCCAGAACTTGGAGCTGCAAGACCCAATGAACTG
GATAATGAAAGCTGGGGCTTTGTTCATCCAAGGCTTCTCAGTGTTCCGGAGTTGTGCTAT
TACGCTGCAGATGCCTGGATCACCCTTACCAACTTTTTACAAAACCTCCATCTCTTCAAG
ACTGAAAACCCAGGCAAGTTCTGTCTACTAGTCTGTGGCTTCCTTACTTTCCTGGCGGTT
CTTGGTGGATACATTCCTGGCCTTGTGCTGTCGTACCTGCTGTCCATATATCATCGCCTG
GGCCAACGTGCTTACCAGAAGTTGGAGCCAGCCCTGCAGAGGCTGGATTTCAGTGTCCGT
GGTTACATGATGGCCAAACAGAAAGAGAGACAAATACATGGTCGTGCACTCCCCTCCAAT
GAAGCAAGTGACAGTGAAGAGGAGCTTGCTGCATTTTGTCCAATGTTGGATGATTCAGTA
GTTGCGAAAGAACTAGCTATTTCCGATTCTGAACATTCAGACGCTGATGTTTCTTACACA
GAAAATGGCACGTTCAACCTATCCAGGGGTCAAACGCCTCTTACAGAAGGCTCTGAAGAT
CTGGATCGTCATAGTGACCCTGAAGAATCATTTGCTCGAGATCTCCCTGACTTTCCATCC
ATCAACCCAGAAGCATTGGGAATAGATGATGAAGATGACACAAGCATTGGCCTACCAAGT
TCAATAAACCTTCCACGACTTTCTTCCAATAAAGTGTATGATGAGCAGGAGTCAGAGACA
GAGATGTCTTTGAGTAGCTTCCCTGGGGCTCAACAGATCACAGACAACATTGCCGGTTTG
GTCACTAGAGGTATGATACAGTTGGCGTTGTCTGGTGCCAGCCAACAAAGTTCCTCCTTT
TTGGAAAATCCCAGAGCCAAAACATATCAGAGAAACTCTAGCTCCGAGATGGATACTGAT
GCAGAAGCTGATGACTTTGAACTATTGGACCAATCTGAACTGAACCAGATGGACCCAGCC
AGCCACCGTGGCCATCAGTGA
>g448
ATGGAGAGAATTCCCAGCGCTCAGCCACCTCCTGCCTGTCTGGAAAGATCCCCTTCCTTG
TCTGGGGTGGATTTCTCGCACATGTATCAAGTGTTCAAACCAAGAAAAGGTCTAAAGAGA
TGTGAAGACACCAAGGACACGTATAAATTGCCGCACCGGTTGATTGAGAAGAAGCGCCGC
GATAGGATTAATGAATGTATTTCTCAGCTCAAGGACTTATTACCCGAGCATCTCAAACTG
ACGACTTTGGGGCACCTGGAGAAAGCTGTTGTATTGGAGCTAACCCTGAAACACGTCCAG
TCTTTATCCAGTCTGATTGAGCAGCAGCAAAAGCAGATTGTTACCCTCCAACGTGGTTCA
CCTTCTGATGGAAGCAGAATGTCTGGCGAGGAGATGTTCCTCTCTGGTTTCCAGCTCTGC
GCTGAGGAGGCTCTTCGCTTCCTCGAGGGTGGCGAGAGACGTGAACTGGTTGCTCACCTG
CACCGCGTGGCTTCCGATCTCAGCCGGAGCCCATCTAGGACACCAAAACTATCTGACAAA
CCAGTCCTCAAGGGACAAGCTACCAACTGTGTCCCGGTCATTCGGCGCGCAGCCCCTCTT
CAATCAGGGGAACAGAGTGGGACGGACACAGACACGGATAGTGGTTATGGAGGGGAAGCA
GATAAAGTGGAGTCTTCGCATGAGCAGAGTGGTACCTGGAAAGAAGAAAAGAGCAGTTCC
CCAAGCTTGGACCGCATCATCAAACAAGAGGAAGATGAGGTTCCCAAGAAGAGACCTAGG
CTGGACACCAACGTTGGGGAGGACCGCTTCTGTAGCAATGACCTACAATCAACAGAATCC
TACCCTACTCATCCCCTCTGCCTGCCCTTTTATCTCATCCCACCTTCAGCCTCTGCCTAT
CTCCCCATGCTGGAGAAGTGCTGGTATCCAGGATCTATGCCCATGCTGTACCCTACACTA
TCGCACTCCGGTTTACTAAGTCAGGACAGGGCTCAGCAAATTCACTCGCCTGCCATGTCA
TCGCTGGACTCTTCTGCATTGCTACATGCACTGAAACAGATGCCCAAACTGGGTACAGAT
TCTAAGGAATGA
>g451
ATGGCAATTTACAAAGAGGTCGCTAAAAGCTGCCTGCTACGTGAGGACCTTGGTATGTTG
GTGTGGTCCCCCAATCCAAACCTCTCAGAAGCCAAATTGGATGAATACATTGCCGTTGCA
AAAGAAAAACATGGTTACAACATGGAGCAGGCTCTCGGCATGCTTTTTTGGCATAAACAT
GATATGGAAAAATCCCTGGCAGATTTGCCTAATTTTACCCCGTTCCCGGATGAGTGGACC
GTGGAAGACAAGGTCTTATTTGAGCAGGCCTTTAGTTTTCATGGAAAATCATTTCACCGA
ATCCAACAAATGCTTCCTGATAAGTCTATTGCCGCCTTGGTAAAATACTACTATTCCTGG
AAGAAGACTCGCTCTAAAACCAGCGTGATGGACCGCCATGCTCGCAAACAAAAGCGAGAG
CGCGAGGAAAGTGGGGATGAGATGGAGGAGGCCAGTGGAAGCAACACAATGGAGATTGAT
GCAGAACTCCAACCAAAAGAACCCAAGAAAGAGGTTCCCAAAAATGACACCGTGCCTCAC
GTGAAAAAGGAAAAACACCCATCGCAGGCTAAAAACCGGGCCAAACGAAACCCCCCAAAG
GGGATGTTTCTCTCCCAGGAAGATGTTGGCGCGGTTTCTGCGGATGCCAACTCTGCCATC
ACCGTGTTGCGGCACCTGGACATGGAACTCGTGTCGATAAAGAGACAGATTCAGAGCATC
AAACAACAAAATAGCTCTCTTAAAGAACAACTTCAGGGTGGTGTTGAAGAATACAAGGTG
GCGGAGGCTAATCAGAAGTTTAATGCTCGTTGGACAACAGAAGAACAGCTTCTTGCTGTG
CAAGCCATCCGTAAATACGGGCGCGACTTTCAGGCCATCTCCGACGTGATCGGAAACAAA
TCCGTGGTGCAGGTCAAAAACTTCTTTGTGAATTATCGGCGGCGCTTTAACATCGATCAG
GTGCTGCAAGAATGGGAGGCAGAACATGGAAAGGCCGAGGAGAACGGAGACTGCCCCGCC
AAGCGTATAAAGCTGTCGGACGCGGCTGTGAAAACGTCTGATGAAGAGGATGAG
>g446
ATGCGGTGGTGCTCGGTGCTGCTTGGGCTGCTTTTGCTCCGTCTCGGGCTGCATGCTCTG
CGGGGCCTGATCCCACCCGGTACGGTGCGGGCAGCGGCACAGGGGGTCTCCGCCGTGTGC
AAAGCTACGTATGGACGCTTCTTTGTGGGCCCCGGAGATGATTATGGACGCCGGTACAGC
TCCTTCCCCACCGGACTCCGCATGGAGATGCGGGAGATGGCCCGGAACATGTTCTCGTTC
GGCTACGATAACTACATGAAATACGCTTTCCCCGAGGACGAGCTCAACCCCATCTGGTGC
CGAGGACGCGGCCCGGACACCGGAAACCCTTCAAATCTTAACATCAATGATGTCCTTGGA
AACTATTCTCTAACCCTGATTGATGCTCTGGATACGTTAGCGGTCATGGGGAACACCACG
GAGTTCCAGAAAGCTGTACGCTTGGTGATAGACACAGTCTCTTTTGACAAAGATTCCACG
GTTCAGGTGTTTGAAGCAACGATCAGGATCCTGGGTAGTCTGCTGTCTGCTCACATCATC
CTAACAGACTCCAGTCAGCCCTTCGGCAACATGACAATAAGTGATTATAACGATGAACTT
TTGCACATGGCGCATGACCTCGCTGTTAGGCTTCTTCCTGCCTTTGAGAATACCGGGACA
GGCATGCCCCATCCAAGGGTCAACCTCCAGAAAGGAGTCCCACCAGATAGCCTCAACGAG
ACCTGCACTGCCGGCGCTGGTTCACTGCTGGTAGAATTTGGCATTCTAAGCAGGCTTTTG
GGAGATTCTACGTTTGAATGGGTCGCCCGCCGCGCAGTCCGAGCCCTGTGGAGTTTAAGG
AGCAACGATACGGGGCTGCTGGGTAACGTCGTAAATATACAGACTGGGCATTGGGTTGGG
AAGCAGAGTGGATTAGGAGCTGGGCTGGACTCGTTCTTTGAATACCTTCTCAAGTCCTAC
ATTTTGTTTGGAGAGGAAGAAGACCTAGGAATGTTTAACGAAGCCTACAAAAGTATCCAG
AGCCACCTCAGACGAGGACGAGAATCATGTAATGAGGGCGAGGGTGATCCACCTCTCTAT
GTCAATGTGAACATGTTAAACGGGCAACTGATGAATACGTGGATTGACTCTCTGCAAGCT
TTCTTTCCTGGGCTTCAGGTATTGAAAGGGGACATAGAGGATGCTATTTGCCTTCATGCA
TTTTACTATGCAATCTGGAAAAGATATGGAGCGCTTCCTGAGAGGTACAACTGGCAGCTA
CAAGCCCCTGATGTCTCGTTTTATCCCCTCAGACCAGAGTTGGTGGAGTCCACGTACCTC
TTGTACCAGGCCACCAAGAACCCATTCTACCTCCATGTTGGGATGGACATCCTCCTGAGC
CTGGAGAAACATGCAAAAGCAAAGTGTGGATATGCTACTTTACACCATGTAGTTGAGAAG
TCCCATGAAGATAGAATGGAGAGCTTCTTCTTGAGTGAGACATGTAAATATCTGTATTTG
CTGTTTGATGAGGATAACCCCGTGCACAGAACTGGAAACAAGTATCTCTTCACAACCGAG
GGCCATTTGGTTCCTCTGGATCCTCGTTTCAGAAAGACACCCTGGCATGACTTCTTTTAT
GAAGAAGGGAAAGGAGAGAAAAGTTTGGAAAAACTATCTCAGACCAAGCTTCGCGCATCA
AACTCCAGCACCAATTGTCACAGAGTCCCTGAAGAGCGAAGGTTTTCTCTCCCCTTGAAG
AGCGTCTACATGCGTCAGATAGATAAGATGGTGGGACTCCTATGA
>g456
GAGGAAAAAACAAGGGAGAAGGCAGCAGAAGCCAAAGAAGTAAAACTGTACGCACAGATA
CCTCCAATTGAAAAGATGGATGCATCCTTATCTACGCTGGTCAATTGCGAGAAGTTGTCT
CTTTCTACTAACTGCATTGAAAAAATTGCAAATTTAAATGGACTAACTGAGTTTGCAAAG
CTGGCAGAGCTGCCATGTCTCGAGGACCTTGTATTTATGGGAAATCCTCTAGAGGAGAAG
CATACGGCTGAGGGCAACTGGATGGAAGAGGCAACAAGACGTCTTCCAAAACTGAAGAAA
CTTGATGGTAAGTTAGGAAAAATGGTGGTGATTAGAAGTGAAAAATCAAACTTTGTGATC
TTTATTGGGCCGTGA
>g460
ATGGCGGATAGCGCCAGCGAGAGTGACACGGATGGTGGAGGGAACAACTCGGCGGCAATG
CAGACTTCGTCTTCGGCGTCTGCTTCTGGCAAGTCGGGCATCGTCATCTCTCCGTTCCGC
CTGGAGGAGCTGACTAACCGCCTTGCCTCGTTGCAGCAGGAGAACAAAGTGCTTAAGATC
GAGCTGGAAACCTACAAGCTAAAGTGCAAAGCATTGCAGGAGGAGAACCGGGATCTGCGC
AAAGCCAGCGTCACCATACAAGCAAGGGCTGAACAAGAAGAAGAGTTTATAAGTAATACT
CTATTTAAAAAGATCCAGGCTTTGCAGAAAGAGAAAGAAACCCTCGCTGTCAACTATGAG
AAAGAAGAAGAGTTCCTCACGAATGAACTGTCGCGGAAACTCATGCAGTTACAGCATGAA
AAGGCCGAGCTTGAACAACATTTGGAACAGGAACAAGAGTTTCAGGTTAATAAATTAATG
AAGAAAATAAAGAAACTGGAAAATGACACCATCTCCAAACAGCTGACCCTAGAACAGCTA
AGACGCGAAAAAATTGACCTTGAAAACACCTTAGAACAAGAACAAGAAGCATTGGTAAAT
CGTCTGTGGAAGAGGATGGATAAACTCGAAGCTGAGAAAAGAATTCTACAGGAAAAATTG
GACCAACCTGTTTCGGCTCCTCCCTCACCACGAGACATATCGATGGAAATCGATTCTCCA
GAAAACATGATGAGACACATACGATTCCTGAAGAATGAAGTAGAAAGACTAAAAAAACAA
TTACGAGCAGCTCAATTGCAGCACACAGAGAAAATGGCTCAGTATTTGGAAGAGGAACGC
CACATGAGGGAAGAGAACTTGCGGCTGCAGAGAAAGCTGCAGCGTGAAATGGAGAGAAGA
GAAGCTCTGTGTAGACAACTTTCAGAAAGCGAGTCCAGCTTAGAAATGGATGATGAGAGG
TATTTTAATGAAATGTCTGCACAAGGACTAAGGCCTCGCACCGTATCCAGCCCGATCCCC
TATACTCCATCGCCAAGCTCTAGCCGGCCTATTTCACCTGGTAGCTTTTCTTCTTTCTTC
TATCTTTTATAG
>g459
ATGGCATATCAAAAGCCACCAGATGGTGGATGGGGCTGGGTCATTGTCACCATCTCCTTC
TTCATCCAGTTCCTCTGTTATGGATCCCCTCTGGCCGTTGGGATTCTTTATGTTGAATGG
CTGGACGTGTTCGATGAAGGCAAAGGGAAGACTGCATGGGTTGGGTCACTGGCTGCTGGA
TTTGGTCTCCTAGCAAGTCCATTGTGCAGTGCGAGTGTGTCCTCATTTGGAGCGCGCCCA
GTGACCATCTTCAGCTCTTTCTTGGTGGCTGGTGGACTTATCCTGAGCAGTTTTGCACCC
AATCTGTACTTTCTATATTTTTCGTATGGATTTATGGTTGGTTTTGGATGTGGCCTGTTG
TATACCGCAACCGTGACTATTACATGTCAGTATTTTGAGAAACGTAGAGGACTCGCTCTT
GGGATCATTTCAACAGGTTCAAGTGTTGGGACTTTTATATATGCAGGTCTTCAAAAGGAG
CTAATATCTCTCTATGGATTGGATGGGTGTTTGTTAATTGTTGGTGCTCTGTCTTTAAAT
ATATTAGCATGTGGCATTCTAATGAGACCTTTGCCACAATCACCCAAAGCTTCTCCTCTG
AAGATATGTCCAGAGAAAATTCCAGATACCTACCTCATCTACCATGAAAAAGGTTGTAAC
AGTGAAGAAAATATAGGGCCAATTGTCAAAACATCAGTAGATGACTGCAAATTGGAAACC
TTCCTCCATAAGAACAAGTTTACAGCTCTGCCCACAACAGAAAAGGACAATTGTATCAAC
AAAGTGGCGGAGGCACATACTTGCAAACAGCTAGCAAAGAACAAATGTCATCGATACTTG
GATTATTGGGAAAATACGATTGACCTATTCAAAAACAAAGTGTTCTCGGCACTGTTTGTG
GCCATTTTGCTTTTTGACATTGGAGGATTTCCTCCTGCTTTACTTTTGGAGGACGTAGCA
AAAAGTGCCAATATTGACGAAGAGTCCATTGTTGTGCCACTTATCTCCATCTTTGGCTTC
ATGATGGCCGTTGGAAAGCTCAGTTTAGGTATCCTTGCTGATTTTAAATGGATGAATACA
TTGTATTTGTATATTTTTACTCTATTCCTGACAGGACTGGCCTTATTTGCCGTGCCTTTT
GCAAACTCATATGCTGCTTTAGCTTTTCTTGCCGGGACACTAGGATTTTTATCCGGGAAC
TGGTCAATATTCCCTTATGTGACGACAAACACCGTGGGGCTGGAAAAACTAACACATGCC
TATGGGATACTGATGTTTTTTGCTGGAATTGGAAATTGTCTTGGACCCCCAATAGTTGGC
TGGTTTTTTGACTGGACCCAGACATACACCATAGCATTCTATTTCTGCGGAACCTGCGTT
CTCTTGAGTGGACTGCTTTTGTTAGTAGTGTCTTTACCACTTTGGGATAAATGTAAAAAG
AAAAAGCAGGAACCATCTTCAAAAAGCTACATTTATAAAGTAGCTTCAACTGTTTAA
>g477
GCCGGGGTTGATGAGATGAGTGAAAATAAATCCCAAGCAGTTGATGTTGCATCCACCCAG
ACCGAAGCGTCTGTCAAACCTTTACCGTTTAAGCAACCGAATTTTCAGCATTCAGGTATT
GGAGGAGCTGCAGCTGGCAAGAAGAACAGGACCTGGAAGAACCTGAAACAAATTCTTGCT
TTGGAAAGGGCATTACCATGGCAACTAAATGATCCAAGCTATTTCAGTATTGACGCCCCC
CCTTCATGCAAGCCTGCAAAGAAATACTCTGACATCTCAGGGCTTCCTGCCAATTACACG
GACCCTCAAAGCAAGTTAAGATTCAGCACAATTGAAGAATTCAATTACATCAGGATGCTG
CCTTCAGATGTTGTCACTGGGTATTTGACTCTGCGAAAAGCAGCAAGCATTGTAACGTAG
>g475
ATGAATGAACTGAAGAATCTGCAGGCAACTGGACTTACGACGCTCGGTCAGGCGCTGAGG
TCGTCATTCGATTTGCTCAATTTGAATAGATTGGTGTCTGGAATAGACAATTACGGACAG
GGAAGAAATCCTTTCTTTTTGGAGCCCTCCATTTTAATCACCATCACAGACGGGAACAAG
CTTACAGTTTCGTCGGGAGTCCAGGAAGAGCTTCATCTTCCTTTGCATTCTCCCTTGCCT
GGAAGTGAACTCACCAAAGAGCCGTTCCGGTGGGATCAGCGGCTGTTTGCCCTCGTGCTT
CGTCTCCCAGGAGCTTCATCCGTGGAACCTGAGCAACTGGGGAGCGTCCCCTCCGATGAG
TCCGCCGTCACGCAGATGTGTGAGGTTACGGGAGGCCGTTCGTACTGCGTAAGGACCCAG
CGGATGTTGAACCAGTGTTTAGAGTCTCTGGTGCAGAAGGTTCAAAGTGGGGTCGTGATA
AATTTTGAGAAAACGGGCCCTGACCCTGCACCCAGCGGAGAAGATGGAGTCACAGATTCG
GTCAGACCCATTAATTTGTTTGCTCCACAAGCATGGCATAGCTGCCATAAACTTATCTAT
GTGCGACCCAATCCAAAAACCGGCGTTCCTGTGGGACACTGGCCAATTCCCGAATCCTTT
TGGCCTGATCCGAACTCTCCTACGCTGCCGCCTCGCACGGCACACCCTGTGCTGAGGTTC
TCTTGTGCGGAGTGTGAACCTATGGTCATTGACAAACTCCCATTCGACAAATACGAGCTT
GAGCCGTCTCCGTTAACGCAGTACATTCTAGAGAGGAAATCTCCCCACACCTGCTGGCAG
GTGTTTGTGAGCAACAGCGGAAAGTACAGTGAAATTGGGCAGCCGTTTGGGTATCTGAAA
GCAAGCACCACTCTCACCTGCGTGAACCTTTTCGTCATGCCATACAACTACCCGGTACTG
CTTCCGTTACTTGGTGAGTTACATGTTCTAGAACGGAGCTGCGTTCGTCTAAACAGCATC
>g483
ATGGAGGCCATAGCAAAATACGACTTCAAAGCCACAGCAGATGATGAGCTGAGTTTCAAA
CGAGGGGACGTTCTGAAGGTCCTGAATGAAGAGTGTGACCAGAACTGGTACAAAGCTGAA
CTCAACGGAAAAGATGGATTCATTCCCAAAAATTATATTGAGATGAAGCCACATCCGTGG
TTTTTCGGCAAGATTCCACGTGCCAAAGCAGAAGAGATGCTTGGTAAGCAAAGACACGAT
GGTGCCTTTTTGATCCGTGAGAGTGAAAGTGCACCCGGAGACTTCTCTTTATCAGTCAAA
TTTGGCAATGATGTGCAGCACTTCAAGGTTTTGCGAGATGGTGCAGGGAAGTATTTCCTG
TGGGTTGTAAAGTTCAACTCCCTGAATGAGCTAGTTGATTACCATCGGTCTACATCGGTA
TCCCGGAACCAACAGATCTTCTTGCGTGACATCGAGCAGGTGCCACAGGTACACGGGGGA
GAAAGAGCAACGAATTTACCACAGCAACCCACCTACGTGCAGGCGCTGTTTGATTTCGAT
CCCCAAGAAGATGGGGAACTCGGATTTCGACGAGGAGACTTCATCCAAGTGGTGGACAAC
TCAGATCCGAACTGGTGGAAGGGAACTTGCCATGGGCAAACTGGCATGTTCCCACGCAAT
TATGTGACGCCTGTCAACCGCAACCTGTAA
>g484
ATGGTTGGCTATGACCCTAACTCCAAGGGACATCTGCTGTCTCCATCAGAGGTAGCTACT
GCTGGATCCCTTTCAGGACTGGTAACTAGAGCTATGATCAGCCCCCTGGATGTTCTTAAG
ATCCGCTTTCAGCTGCAAATTGAGGACATTTCTGCCCGGAGTGCTCAAGGGAAGTACCAA
GGTATCCTCCAAGCAGCCAAGCTCATCCAGCAGGAAGAGGGTCTGCAAGGATTCTGGAAG
GGGCATATCCCAGCCCAGCTCCTATCAGTGTCCTATGGGGCAGTGCAATTTTTGAGCTTT
GAACTGCTAACAGAAGTCTTCCACAACTCCACTTCGCTGGATCCCCGTGGTCCTATAGTA
CACTTCTTGTGTGGGGGACTTTCTGCCTGCTTTGCAACATTGACCGTGCAGCCCCTGGAT
ACACTGAGGACGCGCTTTGCTGCTCAGGGAGAGCCCAAGATAACTTTAGGAATCTGCTGT
GCGGCAGTGGAGCAGGTGTGA
>g488
CTTTGGGGCCTGGTGAACAATGCTGGTATTGGGGTTCCATCTGGCCCTTCTGAATGGCTT
ACAAAAGATGATTTTTTAAAAGTCTTGGAAGTAAACTTGCTGGGGCTTATTGATGTCACA
ATTAAAATGTTACCCCTAATTCGAAAATCCAAAGGACGTGTAGTAAATGTAGGAAGCCTT
GCAGGAAGATTAACAATATGTGGGGGAGGATATGCTGTTTCTAAATATGGAGTGGAATCA
TTCTCCGACAGCCTCCGCCGTGAAATGCTACCATTTGGTGTGAAGGTATCTATTGTGGAA
CCTGGATTCTTTAATACAGGAATAACAAATCCAAAAACTCAAATGAAAAACATACAGACA
CTCTGGGAGAGGCTTTCAGAAGAAACTCAGAAGTGTTATGGTGAAGAATATTTCAAAAAG
AATTACCAGGTTGTTGATTCCATTGAGAAAATCTGCAGCACAAACCTTAATCTGGCCACA
GACTGTATGGAGCATGCACTAATAGCAGTGTACCCTCGGACTCGTTACACTGCAGGATGG
GATGCCAAACTCTTCTTGTTACCTCTATCTTACTTTCCAGCAGTAGTAGCTGATTTTGTT
CTTAATCTTGGTCAACTTAAACCAGCCCAGAGTATCTGA
>g490
TTATCTGAAGATGCAAAGAAACTCTTCGAAAGTCTTGGAAGCAGAGAGGTTCGTAATATA
AAGTTCCGGTCGGCGTGGACATTTCTGGCTGCAAAAGGCGCACAATTGCCCGAAAACTTG
GAAAAAGAAAAGATCAACCATTCGCATGAAACGAAGAACAGATACAGCGGCTGGCCGGCG
GAGATTCAGATTGATGGCTGCATTCCAAAACAGTAA
>g482
ATGAAGCAGCCGGTACTAAATTGTTGTACAGAAGTGGAATATACGCCTATACATGAGTGT
TTTCAAGTGCCCTGCATGGAACCAGAAGAGAAGATCCAGGATGGCCACAGGCCATGTTTG
GGCCTCTCTACCCGCCAGGCTCTGTCACGCTTGCAAGAACAGTTGTCATTAGCCCTGGGA
AACCACCAGAGACAAAAGAACAAGACATTTCTGAGAAAGGACTGGAAGCAGAGCTTCCTA
TATCATGGCAACCGCTCCTCTTGCTTCCATTGGCCTGGTGCTGCTCTTATGTTGCTTGCT
ACGTTTTTACTTGTATGTTGTTACGGCAGCCAGCCTGAAGGGAGTCAGGGCTCTGAATTG
GGTAATGCCTTGGCCCTCTTGCTTTTGCTTCTCCTTGATTTGTTTCTAATGAGACGACTG
GAGATTCTTAAAGAAAGAGAAGTGGAAAGGAGACTGACGAAGATCATCACAGAGATAAAT
GATGCTCTGAAGAGTGGGCTGGAGATGATTTGGGGGGACGCTCTCTATCCTGATCTGTAT
ATGCCAACTGCTCCATCATGGTCTCTTCACTGGGCATATCGAGATGGAAGACTCGTCAAC
CTGCCGGTCAACTTGTTGGTAGATGGGGATATTATAGCTCTACGGCCAGGACAGGAATCA
TTTGCTTCTCTACGTGGAATGAAGGACGATGAGCACATTGTCCTAGAGCCAGGAGACCTC
TTTCCTCCTTTCTCACCTCCACCATCCCCACGTGCTGAGGGTAAGAGGATTCCCCACGAC
CCACAGCAACATCACCTCTTCCGTGTCCTGAAAACACCTGTATTGGAAAATGTCAGGAGC
TGGCTGGATCGGGCTCTCACTCGCCCCGGAACTGCGCTGGATAATGAGAGGTTTACAGTT
CAGTCTGTCATGCTGATATATGCTGTTCCCATCATTGTGGTAAGCTTCCTTATCACCAAC
GCCTTGCGTCTTCTTTTCCATGCTCCTGGCATCCCGCCTGCACCGTATGCGCTGCTGCAA
TTGCAGGTGAATGCGGTGATACCGGTGCTTCCCCTTCTTTTCCCGGTTATGTGGATCCTA
GTAACGGCACTCGGAGAGGCGCGTGTTCTGGCTCAAATGAGCAAGATTTCTCCAACTACC
TTGATGGCTAAGTTTTCTGAAGATACTCTCAGCAGCTATACCGAGGTAGTGTCTGCACAG
GAATTGATGCGCTGCACGTGTTCACACTTTCTCCGTGTCCTGGTGGGAAGCTCTGAGACT
CTGGCATACACCTCAAGCTTGCTGCATGGCCTAGGATCTGTTACTGTGCTATGCTGCGTG
GATAAGCAGGGCATCCTCTCGTGGCCTAATCCCAGCCCAGAGACTGTTCTGTTTTTTAGT
GGAAGGGTAGATCAGGCTACAGACAGACACGAGGATATGGCTGACCAGATGTCCCTACGC
TCCTACTGCCAGGCTGAGCTTGAAGATGAGCCACAAGAGATGGTTGCACTTCTGGCAAAC
ACAGACACTTTGCAATTAGTGAATGAGAATGACACAAACGAACCGCCTGCCGATCCCAGT
AAGCCTAATGAAAGAAAGGCACACACTCGGAGCAAACATGCTTCTGGATCTAACGTGAGC
TTCAGTCAAGATGCAGGAGGGCTGCTTAATAGTGAAATGGAAGATTATATATGTGACTGT
CACCTAGAGATGCTCCGTCTGTCACAAGATCAACAGAATCCACAGAGCATCCAGTTTGAT
GAATCCAACTGGCAACTCCATCTGAGCTCTCTCAAACCTATAGGACTAAATGTGCTATTA
AACCTCTGTAACCCTGGAGTGACTACCACCCTCTGCCGGTTCTCTGACCATATGAGGCAC
ATCGCTCTGCAAGAAACACAATGTTCTGTGCTTCCCGGGCACATTCCCTGGGGCCTGTGT
GACTTCTCCAGGCTAATCGGATTCACTCCGGGAGCCAAGGATCTGTTTAAATTACAGAAT
CACGTGTCTCTCTACCGCCTTCCAAATGATGAGACTGTGAAAGAGACATTGCTGTCTAAG
TTTCCGTTATCTACCAAGCGGAGACCCCTCCTCAGCCATATGATCAGTCTTTTTGTGAGG
GACCTTACTACTAACACTGAGCAGATGCTGTCCCATGGAACAGCCGACGTTATCCTTGAA
GCTTGCACAGATTTCTGGGATGGAGCTGACATCTACCCTCTTTCTGGGTCTGACAGGAAG
AAGGTTTTGGATTTCTATCAGCGTGCCTGCCTATCTGGCTACTGCTCAGCATTCTCTTAC
AAGCCCATGCATTACTCCTTGTCACACCAGCTTCATGGGAAATGTATAGAAATGCAGCAT
ACTCCTGGCCAAAGCACCATTTCTGCTTTATGTGACTCTGGTGGAACTATCCCTCTCAAA
ACTACTGGCCGACACGATAGCTGGAGCTCTGATGAAGGCATTGGAGAAGTGGCGGAGGAT
TTTACACAGGCTCTAAGTGGTCAGATTTTCATGGGGATGGTGTCTTCTCAGTATCAGGCT
CGTTTGGACATTGTGCGTCTAATAGATGCTTTAGTGAATGCTTGCATAAGATTTGTCTAC
TTTTCCATGGAGGATGAACTCAGGAGCAAGGTATTTGCAGAAAAGATGGGTCTGGAAACT
GGGTGGAACTGTCACATATCCCTGACACCTAATGGTGAAGGACCAGGGTCAGAAGTTCCA
CCATCCAGTCCAAGCCATGCAGGCTCCCTGCGAGATGACCTTAACCAGACATCCCGAGAA
GATGCAGAGGGACTCCTCCTTATGGAAGATGAGGGTCATGCTGATATGATTAGCTTTCAA
CCCACAGATAGTGATGTACCCAGCTTCTTGGAAGACTCCAACAGGGCAAAGCTTCCCCGT
GGCATCCACCAGGTTAGACCTCATCTTCAGAACATTGATAATGTTCCCTTGCTGGTTCCA
CTTTTTACAGACTGCACCCCTGAAACCATGTGTGAAATGATTCAGATAATGCAGGAGTAT
GAGGAAGTGACCTGTTGTCTGGGGAGCTCTGCAAGCATCAGAAACAGTGGACTTTTTTTG
CAAAGTGATATC
>g489
ATGGTCATAGAAGATACAGACACCAAGTGCCAATCTTCCGAGTCGGCGGGCGACATCTAT
TACCCTTCATCGTTGCAGATGTCTCAGCAGGAGGAAAGTGATTTCTCCGTGGAGGTTCAC
CATACGTTATCCGAAACGTTTGACGTTGGAGATGGCGAAAGTATGAACGAATTCGTCTCG
CGTTGTCTGCAAGACGAAGACGAGGAGGATTTCACGCCGTCGGATATCTGTAGCGAGGCA
GACGCGGATGACGACGATTTGCAGGATAATTCTCAGCCCCAGTCACCCGAGCAACAGAGG
TTCTTTATGGAGCATTTCGGAACCCTGACCGATGCTTACACCGAAGAGAAATTTGATAAC
ACTTTGAAGGATCTGAAACCTACAGAGGGTGATGACAGCGATTTGTTTCTTAATCCCCGT
CTGAGCATTTCTTCCAAGTTTCTGTCCCTGTGTCAGAGGAGCAGCCGTTTTGATACAAGG
TTTATATGCGGAAAGCTCTGCAAACACCTGAGCTCTCCTATCCTGTCTGACTGGCAGAAA
GATTTATCAAAGACGTTGCCCAGTTTGCAGAAACTGCCGTGCGTGGACAAGGCGGCCTCC
AGATCCTCGTTTCCTGGATGCTGGCCGACCAAGGACCTCTCGCTGAACAAATCCAGCAGG
GCCAAGTCGTACATGGAGGCAACGGCTAGCTCCAAGGCCAAAATATGCCGCAGCGTGTCG
ATGGGGGATAACATTAACACGTCGCAAGTTGAGGACACTAAGAAACCGTCCAACCTGTGC
AGACCCGTGTCTAGCGTCGATCTGTACTCGTTCGAGCCAAGGAGGCATCATCTCGCGGAG
GACGGTTCAAACAAATTGCTGCAAACCTCTACAAAACAAGATCAGATACCACCCGAGAGC
CACGAACCAAAAGTGAAGTCCTCGCTCAGTATTCCCGACGTATCCGATCACATTTTAATG
CCACCCCCGGCAACCTGTGGGATCCTTCCCCGATTAAAGAAGAAAGCGAAATCCGTCAGT
AACTTATCAAAGGCAAATGGAAAAGACGAGCAGAGCGGTCCGGTCCCGAAGCAGAAGTGC
GAGGCTGCGAAAAGACTAAGCGTTCACGAAAAAACCACGGACTTCCAGGAAATTCCCAAG
AGGCGCTTTTCATCGGCGCACAGAATGCCAGACTTTCCCGACTCCAGCCGGAGGTTTTCA
GTAGCCGAGATCCTGACCCATGACGCCTGCGTCTCTTTAGTGGACGAAGCCCCTCCGGAC
CCCCCAGAAAGGGACTCTGAAGCCATGGCAAGCAGAGAGATTTCCGTACCTTGTGTTTCG
CTATCGGCCAGTAGCCCCAAAGATCCTAGTAAGTATTTGGTTCTGTTTGGGGTGAGACGA
CCCCTCCTCTGA
>g491
ATGAATAACATTTTGTGCAGCCAGTATGAGGAGAAGATCCGCCCGTGTATTGACCTCATT
GACTCCCTGAGGGCTCTAGGGGTTGAAAAAGACCTGGCCTTACCGGCTATTGCTGTCATT
GGTGATCAGAGCTCAGGGAAAAGCTCTGTTTTGGAAGCCCTATCTGGAGTAACTCTCCCC
AGAGGCAGTGGGATTGTTACACGATGCCCACTGGAACTGAAGCTTAAGAAGGCACAAGAA
GACTGTCCTTGGAGAGGCAAAATTAAATATGGGGAACATGAGAAAGAGCTTGCTGACTCT
GGAGAAGTGGAGGGTGAAGTAACCAAAGCTCAAGATTGCATGGCTGGCACCGGGAGTGAC
GTCAGTGAGGATCTCATAACGTTGGAAATCGAAGCCCCAAATGTTCCTGACTTAACATTG
ATTGATCTGCCTGGAATCACACGGATCGCTTTGTCTAATCAACGCAAGGACATTGGACAA
CAGATCAAGAATATGATCCACAAGTACATCCTAAAGCAACAGACCATTAGCCTGGTTGTG
GTTCCCAGTAATGTTGACATTGCAACAACTGAAGCTCTTGAGATGGCGCGCCAGGTGGAC
CCCAGCGGGGAAAGAACATTAGGTATATTGACTAAACCGGACTTGGTTGACAAAGGAGCG
GAAAGCCAAGTTATCAGCGTCGTTCGAAATCAGGTTTACGTTCTCAATAAAGGCTTCATG
ATCGTCAAGTGCCGGGGGCAAAAGGAGATACAGGAAAAACTTTCTCTGGAGGAGGCCTTG
AATAATGAGAAGACATTCTTTGAGGAACATGAACATTTTAGTTGTCTTCTGACAGAAGGA
TATGCAACTATTCCTTGTTTGGCAGAGAAGCTTACAACTGAATTAGTGGAACATATCTGT
AAAAATCTTCCGTATTTAGAGAATCAAATCAAGACCAAGCTTTCTGAAGCAGAAGAAAAA
TTGAAAATGATCGGTTTGGGAATTCCGGAAACAGAGATGGAGAAACTTAGCTTCCTTATC
GATAAAATTCGACAATTTTCAAGTGAAATAAGCAACGCGACCAAAGGAGAAGAGACCACC
AATGGTCTCTTAAAGCTTTTCACTAACGTTCGACAGCACTTCTTTTCCTGGGAAGTCTTT
CTGGCAAACTCTTCAAGTCAATTCTCAAAGCAATTAAAAGATGATATGTATCTTTATGAG
AATCGTTATCGCGGCCGGGAGTTTCCTGGATTTGTTAGCTTTAAAACGTTTGAGAATATT
GTGAGGCATCAAGTCCAGACGTTTGAAGAACCAGCCATTACAAAGTTGAAAGACATCACT
GCAATTGTCCAGGTTGCTTTTAGTGAAATAGCCTCAAAACAGTTCGTGGCATTCCCAAAT
CTTTACCGAAAAGCCAAGAGCAAAATCGAAGATATATGTTACGCCCAGCAACAGGAAGCG
GAAAAAATCATCAAAACCTACTTCAAAATGGAAAGCATTATCTACTGCCAGGACAAGATA
TACGGCGGGAGTTTGAAGAAAATAAGAGAAGAAGCTGCAGCCCCCGTGAAATTCCCCTTT
CCTGAGACATCTCAGCTGCAGCTGTCGGTTAATGAAATGTCGGATCACATAAAGGCGTAT
TTCAGGAGCACAACCAGCCGTCTTTCCAATCAAGTTCCTTTGATCATCCAGTATTATATT
CTCCACGAGTTTGCGAACAACTTGGAAATTCAAATGATGCACCTGATCCAAGACAGAGAG
AAGTTAGATTACCTTCTTCAGGAGAAGAACAACCTCTCCAGAGAGAGAAATAATCTGAAG
AACAAAATTAAACGTCTCAAGGCGGCACATCGACGACTTGCCAAGTTCCCTGGTTAA
>g487
ATGCCGCCTAAAAAGACAAAGGTGTCCACAGCGGCGGCTAGAGAGGAGCCCATGGAAGAG
AATGACACAGCCGAGCCTGCTGGGGAAGCCCAAGGAGATGGAGAGACGCATCCACAAGAG
CCCCATAATGTGGCTGTCGATAATCGAAGTTTAGAGGAGATTTTAAGCAGCATCCCTCCT
CCCCCACCTCCAGCGATGACCAATGAAGCCGGAGCTCCTCGTCTCATGATAACTCATATT
GTAAACCAGAACTTCAAATCGTACGCTGGGGAGCGAATTCTGGGGCCTTTTCATAAGCGC
TTTTCTTGCATCATTGGACCGAATGGCAGTGGAAAATCCAATGTTATCGATTCCATGCTC
TTTGTTTTTGGCTATCGAGCGCAAAAAATCCGATCCAAAAAGCTTTCCGTTTTAATACAT
AATTCCGATGAGCATAAAGATATACAAAGTTGCACCGTGGAAGTTCATTTTCAAAAGATT
ATTGACAAGGAAGGGGATGATTTTGAAGTTATTCCTAACAGCAATTTCTATGTGTCCAGA
ACGGCTTATAAAGATAACTCTTCTGTGTACCACATTAGTGGTAAAAAGAAAACGTTTAAG
GATGTTGGTATTTTACTGCGAAGCCATGGAATTGACTTGGATCACAATAGGTTCTTGATA
TTGCAGGGTGAAGTGGAGCAGATTGCGATGATGAAGCCAAAAGGTCAAACTGAACACGAT
GAGGGGATGTTGGAATACTTAGAGGATATAATTGGATCCGAAAGATTAAAGGAGCCCATT
CAAGTTCTGTGCCGCAGAGTTGAAGTCTTAAACGAGCAACGAGGAGAAAAGCTTAATAGG
GTTAAGATGGTGGAAAAAGAAAAGGATGCATTAGAAGGAGAAAAAAACAAGGCCATTGAG
TTCCTTACGGTCGAAAATGAAATATTTAAGAAGAAAAACCAGATATGTCAGTACTATATA
CACGACTTGCAGAAACGTACCCAAGAAATGGAGTCGCAAAAAGAAAAGATCCAAGAAGAT
ACCACGGAAATAAATGAGAAAAGTAAACTGCTATGTGAGGAAATGAAGCTGAAGAATAAA
GCGTTGAAGGACGTGGAAATGCAACTAAATAAAATTACAAAATTCATTGAAGAAAACCGG
GAAAAATTCACTCAGTTGGATCTGCAGGATGTTGATGTCCGCGAGAAACTGAAACATTCA
AAGAGTAAAGTGAAGAAACTTCAGAAACAGCTGCAAAAAGACAAAGAAAAGGTGGAAGAA
TTACAAAGTGTGCCAGCGAGCAGCCAGAAGATTATCGAGGAAGCCACCGGGAAAAAGGAA
GTGCTGGAACAGGAGAAAGAAAAGGAGGAAGGCAAGCTTAAGGAAGTTATGGATAGCCTT
AAAAAGGAAACCCAAGGTTTACAAGAGGAAAAGGAGGGTAAAGAGAAAGAGCTGATGGAG
TTTAGCAAAGCGGTGAATGAAGCACGTTCTAAGATGGATGTGGCGCAGTCTGAACTAGAT
ATCTATCTCAGTCGCCACAACACTGCTCTGGCGCAGCTTAACAAAGCGAAGGAGGCTTTA
AACACTGCTTCAGCTACTCTAAAGGAGAGGAAAGCTGCCATCAAAGAACTCGAACCCAAA
TTACCCAAGTGTGAAGAAGATCTGAAAAAGAAGGAACATGAACTTGAAAGTCTAGCGCAA
GAAGAAATTAATATTAAGAATCAAGTGCGTGAGTTGCGCCAAAAAGTAGAGGAAGCAAAA
AGTTCTTTATCTGCAAATCGCAGCAGAGGAAAGGTTCTTGATGCCCTCATTCAACAAAAG
AAATCGGGAAAAATTCCTGGAATTTATGGAAGACTGGGTGACCTTGGAGCTATTGATGAG
AAGTATGATGTTGCTATTTCATCGTCATGCGGTGCCTTGGATCATATTGTCGTTGACACT
ATTGACACTGCTCAAGAATGTGTCAATTTTTTGAAGAGACAAAATGTTGGTGTTGCCACC
TTCGTTGGTTTAGATAAGATGAAAGTGTGGGAAAAGGGTCTGGATAAGATTCAGACTCCT
GAAAACATCCCACGATTGTTTGATATGGTGAAAGTGAAGGATGAGCACATCAGACCAGCA
TTCTACTTTGCATTGAGAGATACTCTTGTGGCTGATAATCTGGATCAGGCAACTAGAGTT
GCCTTCCAGAAGAATAAGAGATGGAGAGTTGTGACTTTGCAAGGCCAAATTATAGAGCAG
TCTGGTACAATGACAGGTGGCGGTGGAAAAGTTATGAAAGGCAGGATGGGATCATCTGTT
ATGGTGGAAATCTCAGATGCACAGTTACAAAAAATGGAATCCAAACTTAACTGTGATTCT
GAAAAGGCTGCAAGCGTGCAGCATCGCAAAGGACAACTAGAAGAAGAGCTGGCTAAACTT
CGACCAGCAACTCGCGACATGAAGAATACATTTGAGAAATACACTGCTAGCATACAGAGT
CTCTCTGAGCAAGAAGTTCATCTAAAAGCACAAGTGAAAGAGCTGGAAGCTAATGTGGCT
GCTTCTGCCCCAGACAAAAACCAACAAAAACTCATGGAAAAAAAACTAGAAACTTTCAGG
AAAGAGTATGAAAATGCTGCAGAGAAATCTGGAAAAGTGGAGCAGGAAGTGAAACGTCTT
CACAAGCTCATAGTTGATATTAACAATCACAAACTGAAAGCTCAACAGGACAAGCTCGAT
AAAATCAATAGAGAGATAGATGAATGTGCATCTTCTATAACAAAGGCGCAAGTTTCCATC
AAGACAGCTGACCGAAACCTCAAAAAGTCAGAAGATGCTGTTGTCCGTACTGAAAAGGAA
ATTGTAGACAACGACAAAACTATCGAGGAATTGACTGAGGAGTTAAAAAACCTTGAAGAA
AAAGCTACTGCTGTAATGACTGAATGTAAAGATGCAGAGAGTTCTCTCCCAGATGTCCAA
GAACAACACCGTGGCTTGCTTCAAGAAATGAATGCTATTCAGCATAAAGAACATGCCCTC
CAAAAAGATGCTCTCAACATAAGGCTCAAAATTGAACAAATAGACAGTCACATATCAGAG
CATCAGTCTAAAATCAAATACTGGCAGAAAGAGATATCAAAGCTCACGTTACACAGAATA
GAAGACAACCCAGAGGAGGTTCTTCCAGTACTAACACCAGAGGAACTGAATGCCATTAAA
GATCCAGATCAAATAAATAACCAGGTTGCACTTCTTGAGGCAAAAAGTGTGGAAATGAAG
CCAAATCTTGGTGCTATTGCAGAATATAAAAAGAAG
>g501
ATGCTTTTAAATAAGGAATATGCTGATTGCTGGCGGTTTGAAGAAGGATTTCATCATTCT
CACATCATGTACCCAGGTCCATGGCCAAGTGCATATCGATGTTCGTTAAAACCCAAACTT
GGTACTGTCTACATTTTGCTTTTACTGATATCCCTCAACCTCATATCTGCCCAAAGCAGA
CCTTCCAACCATCAAATTGGTAACAGAAGTCCCGAGATTGACCCTTACTGGTATGTGGGT
CGTGGTGTCCGGCCAATTGGCCGATTTGGAAAAAGACAACTAAAGAATAAGAGTAATTTT
CATCCAAGTCTAAGTAGTATCCTTGAACTGATCTTGAATAATCTCAAGAAACAGGAAGGA
CTTGAATTAGACAAGACATTCGAAGATATATACTGGTGA
>g471
ATGGTTTTGGTTAAAAGTTCTAAAATGCTAACAGGAGGGGAACATATCTGGATTGTTCTT
GATGGCCCAGTGGATGCTATTTGGATAGAGAACTTAAATTCTGTCTTGGATGATAATAAA
ACACTAACATTGGCAAATGGAGATCGTATTCCTATGGCACCCAATTGCAAAATTGTCTTT
GAGCCGCATAACATTGACAATGCTTCTCCTGCCACGGTTTCAAGGAATGGTATGGTCTTC
ATGAGTTCTTCAGTTCTCAACTGGAGTCCCATCCTTGAGGGATGGCTGAAAAATCGTTCT
TCATTAGAAGGAGAAATTCTAAGAAAACTGTACAGTGCCTCATTCTCTGATTTGTACCGA
TTTAGTGTCCAGTCTTTAGAATATAAAATAGAAATGTTGGAGGCATTTGTAATAATGCAA
AGCATCAATATGTTACAAGGACTTATCCCTCCAAAGGAGCAAGGTGGAGAAATAAGCCAA
GATCACCTGGAGAGGTTATATGTCTTTTCTTTAATGTGGAGTGTTGGTGCTCTGTTGGAA
CTTGATGACAGAAAGAAAATGGAGCAGTGGCTACGCACTCATGAAAATGTGCATCTGGAT
CTTCCTAAGATCCCACCAGGAAGTGAAGACACAATGTTTGATTATTATGTGACTTCAGAG
GGAAAATGGATGCACTGGAATACGCGTGTGGAGGAGTACATATACCCCCCGGACAGCACT
CCTGAATATGGATCGATCTTGGTGCCCAATGTTGACAATGTTAGAACAGACTTCTTGATA
CAGACAGTAGCCAAGCAGGGCAAGGCGGTGCTGTTAATTGGTGAACAAGGAACAGCCAAA
ACTGTCATTGTTAAGGGATATATGTCAAAATATAATCCAGAGAGCCACATGGCCAAGAGT
CTGAATTTCTCTTCTGCTACTACACCACTGATGTTTCAGCGAACCATCGAGAGTTATGTG
GACAAGCGCATGGGAACCACTTATGGGCCTCCTGCTGGAAAGAAAATGACAGTGTTTATT
GATGACATAAATATGCCTGTGATTAATGAATGGGGGGATCAGGTTACTAATGAAATTGTA
AGGCAGCTTATGGAGCAGAATGGATTCTACAATTTGGAAAAACCTGGAGAATTCACAAAC
CTTGTAGACATCCAGTTTCTGGCAGCTATGATCCATCCTGGTGGAGGAAGAAATGACATT
CCACAAAGGCTAAAAAGGCAGTTTTCTGTTTTTAACTGCACTTTGCCCTCAAACGCTTCC
ATAGACAAAATATTTGGTGTTATTGGACTAGGCCATTACTGCACTCAGAGAGGATTTTCC
GATGAGATAAAAAGAGCTGTTACGAAGCTTGTACCTTTGACAAGGAAATTATGGCAGATG
ACTAAAATCAAAATGTTACCCACACCAGCCAAGTTCCATTACATATTTAACCTTCGAGAC
CTTTCAAGAATATGGCAGGGAATGTTAAACTCCACATCAGAAGTCATTAAAGGCACCACA
GTATTGGTAAAGCTCTGGAAACATGAATGTAAACGTGTTATTGCTGATCGATTTACAACA
CCAGAAGATGTGGACTGGTTTGATAAAACACTGCAGAAATTGGTAGAAGATGACTTCTGT
GAAGGCAAGAAGTCTGCAGACTTTGCATCTGATGATTATTTTGTTGATTTCTTAAGAGAT
GCACCTGAAGCAACAGGTGAGGAACCTGAAGATGCTGATTTTGACATGCCTAAAATTTAT
GAGCCAATTGAATCGTTTACACAATTAAAGGAACGCTTGAACATGTTTCTTCAAATGTTT
AATGAGAGCATCCGTGGAGCTGGAATGGATATGGTATTCTTCAGAGATGCCATGATCCAC
TTGATTAAGATTTCTCGTATCATTCGGACTCCACGTGGAAATGCTCTTCTTGTTGGTGTT
GGTGGTTCAGGAAAACAGAGCTTGACTAAGCTTGCATCTTACATTGCAGGATACAAAACA
TTTCAGATCACTTTAACCAGATCTTACAACACTTCAAATCTTATGGAAGACCTGAAGATC
TTGTACCGTACTGCAGGTCAACAAGGCAAAGGCATCAGTTTTATTTTCACTGACAATGAG
ATCAAAGATGAATCGTTCTTAGAATACATGAACAATGTGTTATCTTCAGGAGAGGTTTCA
AATTTGTTTGCACGAGATGAAATTGATGAAATCACCAGTGACCTTATTCCTGTTATGAAG
AAAGAGTACCCACGCCGCCCTCCTACTAATGAAAACCTGTATGACTTTTTCATGACAAGA
GTCCGTCAGAATCTTCATGTGGTGCTGTGTTTTTCACCAGTGGGAGAAAAATTTAGAAAC
CGGGCACTTAAGTTTCCAGCGCTTATTTCAGGTTGTACAATGGATTGGTTTAGCAGATGG
CCAAAGGATGCCTTGGTAGCAGTGTCTGAACACTTCCTGTCAACATATGAGATTGACTGC
ACCATGGATATCAAAAAGGAGATGGTTGAGTGTATGGGCTCGTTCCAGGATGGTGTGGCA
GAAAAATGTGTGGATTACTTCTTGAGATACCGTCGCGCTACTCATGTGACTCCTAAATCA
TACTTATCATTTATTCAGGGGTACAAAACAATATATAAGGAAAAACATGCTGAAGTACAG
ACCCTGGCAAACAGAATGAACACAGGCTTAGAGAAACTTAAAGAAGCATCCGAATCTGTG
GCAGCTTTGAGTAAAGAATTGGAGGTGAAAGAAAAAGAACTGCAGGTTGCAAACAAGAGA
GCAGATATGGTTTTAAAAGAAGTCACTGTAAAAGCTCAAGCTGCTGAGAAAGTTAAAGCT
GAAGTACAGAAAGTGAAGGACAAGGCTCAATCAATTGTAGACAGTATTTCAGTCGACAAA
GCTATAGCAGAAGAAAAGCTGGAAGCTGCCAAGCCTGCCCTTGATGAAGCAGAAGCAGCA
TTATTGACTATCAAGCCTTCGGACATTTCTACCGTACGAACTCTAGGAAGACCACCTCAT
CTGATCATGCGCATTATGGATTGTGTGCTTTTACTGTTCCAGAGGAAAGTCAACCCTGTC
AAAGTGGACCAAGAAAAGGGATGTACTGTCCCCTCTTGGCAAGAATCCTTAAAACTGATG
ATTGGGAATTTCTTGCAGAGTCTTCAGCAATTTGCGAAAGATACAATCAATGAAGAGGTG
GTGGAACTATTGGCACCATACTTTGAAATGCCAGATTACAACATTGAGACTGCAAAGCGA
GTTTGTGGAAATGTGGCTGGGCTTTGCTCCTGGACCAAAGCTATGGCTGCTTTTTATTCT
ATAAATAAAGAGGTTTTGCCTCTAAAGGCTAATTTAGCAATTCAGGAGAGCCGACTTGCT
ACTGCCAATTTGGATTTGCAAAAGGCCCAGGCAGAATTAGATGCTAAGCAAGCTGAGCTC
GATGTGGTTCAGGCACAGTATGAAAAGGCAATGATGGAAAAGCAGACTTTGCTAGAAGAT
GCTGAACGCTGCAGACATAAGATGCAAACAGCTTCAAGCCTGATTAGTGGCCTTGCTGGA
GAAAAAGAGCGATGGACAGAAGAAAGCAAGGAATTTGCTGCAAAGACCAAACGACTTGTT
GGTGATGTCCTGCTTGCTACAGCTTTCTTGTCATATTCTGGTCCATTTAATCAAGAGTTC
CGGAACTTGCTTTTGACTGATTGGAGAAAGGAAATGAAAACTAGGAAAATTCCATTTGGA
CTCAATTTGAACCTGACTGAGATGTTAATAGACGCACCCACCATCAGTGAATGGAATCTG
CAAGGCCTACCAAACGATGATCTCTCAATTCAGAATGGAATAATTGTAACGAAAGCAGCC
CGTTACCCCCTCCTTATTGATCCACAGACACAAGGCAAAATTTGGATTAAAAACAAAGAA
ATTAAAAATGAACTTCAGGTGAAAGTTGGTGATAAAGAAGTAGATGTGATGAATGGTTTT
AGGCTATACATTACTACTAAGCTTCCTAATCCAGCATACACTCCAGAAATAAGTGCTCGT
ACCTCTATAATTGACTTTACTGTCACCATGAAAGGCCTAGAGGATCAGTTACTGGGACGT
GTCATATTGACAGAGAAGCAGGAATTAGAGAAGGAAAGAACCGATCTCATGGAGGATGTG
ACTGCAAACAAAAGAAAGATGAAAGAGCTGGAGGACAACCTCCTATTTAGATTGACCAGC
ACACAGGGCTCTTTAGTAGATGACGAGAGTCTCATCACTGTGCTCAGTAATACAAAAAAA
ACCTCAGAAGAAGTCACCCAGAAACTGCAAATATCAGCTGAGACTGAAATACAAATCAAC
TCTGCTCGGGAGGAATACAGACCTGGCGGTGCTTCGTTAGATCTGAAAGCTTGTCCTCCC
AAGCCTTCTAAGTGGATCTTGGATATGACATGGCTCAATCTTGTAGAATTAAGTAAATTA
AGGCAGTTTTCTGATATTCTTGATCAGATTACCAGAAATGAGAAGCAATGGAAGCTTTGG
TTTGATAAAGAATTTCCTGAAGAGGAGCAAGTTCCAAGTGGTTATGATCAAGCACTTGAC
TGCTTCCGACGCTTACTGCTGATCCGATCTTGGTGCCCTGACAGAACTATTGCACAGGCC
AGAAAGTACATTATGGATTCCATGGGAAACAAATATGCTGAAGGAGTGATTTTGGACTTG
GAAAAAACATGGGAAGAATCTAATCCACGCACACCCCTTATTTGCTTCCTTTCCATGGGA
TCGGACCCAACAGATTCCATTATTGCTCTAGGAAAGAGACAGAAAATTGAGACCCGTTAT
GTTTCTATGGGACAGGGTCAAGAGGTTCACGCGAGAAAACTTCTTCAGCAAACCATGGCT
CATGGGGGATGGGCCCTGCTGCAAAATTGCCATCTAGGTTTGGACTTTTTGGATGAGTTG
ATGGACACCATTGTAGAGACAGACACCGTACATGATTCATTTCGTCTGTGGATGACTACT
GAGGTTCACAAGAATTTTCCCATTACTCTTCTGCAAATGTCAATCAAATTTACCAATGAA
CCACCTCAAGGACTTAAAGCTGGACTGAAGAGAACGTATGGTGGTGTAAGTCAAGATCTT
CTTGATGTTAGCAGTATGACACAGTGGAAGCCCATGTTGTACGCAGTGGCATTTCTGCAC
TCAACAGTTCAAGAGAGACGGAAGTTTGGACCATTGGGGTGGAATATCCCATATGAATTC
AATCAGGCAGATTTTAATGCTACAGTACAGTTTGTTCAGAATCACCTAGATGACATGGAT
ATCAAAAAGGGCTTGCCTACATATGACACGCCGGAGGTGTTCGGATTGCATCCCAATGCA
GATATCACATATCAGAGTAAGCTGGCAAAAGATGTTTTGGATACCATTCTTAGTATCCAG
CCAAAAGACAGCTCCGGGGGTGGTGGTGAGACAAGAGAAGCGGTGGTTGCTCGACTTGCA
GATGATATGCTAGAGAAACTCCCATCAGATTATATACCATTTGAAGTCAGAGAACGACTC
CAAAAAATGGGACCTTTCCAGCCTATGAACATCTTTCTACGACAGGAAATAGACAGAATG
CAGAGGGTAATAAGTTTGGTGCGAACTACCCTCACAGACCTAAAACTTGCCATTGATGGA
ACCATTATAATGAGTGAAAATTTAAGAGATGCACTAGATTGCATGTATGATGCCAGAATA
CCTGAACGCTGGAAAAAGGCTTCCTGGGCTTCTAGCACATTAGGATTTTGGTTTACTGAA
CTCTTGGAGCGAAACCGTCAATTTTCTTCTTGGATCTTTGAAAGTCGACCAAATTGTTTC
TGGATGACTGGATTTTTTAATCCACAGGGCTTTTTAACTGCAATGAGACAGGAAATTACC
CGAGCTAACAAAGGCTGGGCGTTAGACAGTGTAGTTATCTGCAATGAAGTAACTAAATGG
ATGAAGGATGACATTTCTAGCCCACCACAAGAAGGTGTCTATGTCTATGGTCTGTACCTT
GAAGGAGCTGGCTGGGACAGAAGAAATATGAAACTCATAGAATCAAAGCCAAAGGTGTTG
TTTGAGTTGATGCCTGTGATAAGGATATATGCAGACAATATGGCTGCAAAAGACCCGCGG
CTCTACTCCTGTCCAATATATAAAAAACCAGTGCGCACAGATCTGAACTACATTGCTGCG
GTTGATCTGAAAAGCGCACAGCATCCTGAGCACTGGATACTTCGTGGTGTGGCGCTGCTG
TGTGATGTCAAATAA
>g449
ATGACATCTTTCCTGTCTAATTTCCAGATCCTGACAGTGAGTTTACATGGCAGCCAGATT
ACTAATGAAACCGTGGAAAGGCTTCACGATTTTCCCGTCAGCTTGGCAGTGAGGTGTCAC
ATCCGTTTAAATAAACCATCGTTATGCCCTCTCCGTAACGAGCAGCAGATACATTTCCCA
GTCATTAAAGTCCTTATGCCTCGTTGCCGCTGGTTAGTCAGCGCCGGCGGTACTCTGCTT
CCCTTCCGATGGGATTCTCTTGGATCTACAAAGATGTCTGACAAGATGTCAAGTTTTCTC
CATGTAGGGGACATTGTATCCCTGTACGCGGAGGGATCAGTAAATGGCTTCATCAGCACA
CTGGGATTGGTGGATGACAGGTGTGTGGTGCAGCCCGAGGCAGGGGACCTTAATAACCCA
CCCAAGAAGTTCAGAGACTGTCTGTTTAGACTTTGCCCCATGAACAGATATTCTGCCCAA
AAGCAGTTCTGGAAAGCGGCAAAGCCCGGGGCCAGCAACACGACAGATACTGTTCTTCTC
AACAAACTGCACCATGCAGCAGATCTGGAGAAGAAACAAAATGAAACTGAAAATCGCAAG
CTCTTGGGGACCGTTATTCAGTACGGGAATGTTATACAGATGCTGCATCTGAAAAGTAAC
AAGTACCTTACTGTGAACAAGCGACTCCCGGCCCTCCTGGAGAAAAATGCGATGCGCGTG
ACATTGGATGAAGCTGGAAATGAAGGCTCCTGGTTTTATATCCAGCCTTTCTATAAGCTG
CGCTCCATCGGTGACAGTGTTGTGATTGGTGATAAAGTTGTTCTTAACCCAGTAAATGCT
GGCCAGCCATTACATGCCAGCAGCCACCAACTGGCTGATAACCCTGGATGCAATGAGGTG
AACTCGGTCAATTGTAACACCAGTTGGAAGATTGTTCTTTTCATGAAATGGAGTGACAAC
AAGGATGATATTCTGAAAGGAGGAGATGTTGTGCGGCTCTTTCATGCAGAGCAGGAAAAG
TTCTTGACTTGTGACGAGCACCGGAAGAAGCAGTATGTATTCCTCCGGACCACCGGCCGC
CAGTCTGCCACTTCTGCTACCAGTTCCAAGGCATTATGGGAAGTCGAGGTCGTGCAGCAT
GACCCTTGTAGAGGGGGTGCCGGCTACTGGAACAGCCTTTTCCGATTCAAGCATTTGGCA
ACAGGGCACTACCTGGCAGCTGAGGTGAGTGCCAGCTCCGACCAGTCTCACATTACAATT
CTTTTCCACCAGGTAAATCCTGACTATGAGGCAGGTTGCCTGGAGTCTGAGGTCTGTTCA
GGACTCTGTGCCTTTCATTCTCAGATGGATGCAGAGCAGGATCCGTCTCGGGCACGCATG
CGTGTTGTGCCAGAGAAGATGATGTGCACTTTGGTATCTGTCCCTGAAGGAAATGATATT
TCATCTATTTTTGAATTGGACCCAACTACACTCCGTGGAGGAGACAGTCTAGTACCCAGA
AATTCGTATGTTCGGCTCCGGCATCTCTGCACCAATACCTGGGTCCACAGCACGAACAGC
CCCATAGACAAAGATGAAGAGAAACCAGTTATGTTGAGGATTGGCACATCCCCTGTGAAG
GAGGACAAGGAAGCATTTGCCATCGTCCCGGTGTCCCCAGCTGAAGTTCGTGATCTGGAT
TTTGCAAACGATGCCAGTAAAGTCCTGTCTTCCATTGCAGGCAAACTAGAAAAAGGCACA
ATCACACAAAATGAGAGGAGAGCTGTGACCAAACTTCTGGAGGAGTTGGTGTATTTTGTG
ACTGCTGGGGTAAATTCGGGGCAAGATGTTCTAGAGGTGCTTGTGAACAAACCCAATAGG
GAGCGTCAGAAACTGATGCGGGAGCAGAACATACTCAAACAGATATTCAAGCTGCTGCAA
GCTCCATTCACAGACTGCGGAGATGGTCCAATGCTTAGACTAGAGGAACTTGGAGACCAG
AGACATGCGCCATTCAGACATATATGTAGACTGTGTTACCGTGTCTTAAGACACTCCCAG
CAAGACTATCGCAAAAACCAGGAGTACATCGCAAAGCAGTTTGGTTTCATGCAGAAGCAG
ATCGGTTATGATGTTCTGGCCGAAGACACTATTACAGCTCTGTTACACAATAACCGAAAA
CTCCTAGAGAAACACATCACGGCAGCAGAGATAGACACCTTTGTGAGCTTGGTCAGGAAA
AACAGAGAGCCAAGGTTCCTGGATTATCTGTCTGACCTCTGTGTGTCAATGAATAAATCC
ATCCCAGTAACACAGGAGTTAATCTGCAAAGCTGTGTTGAATCCGGCTAACGCAGACATC
CTAATTGAAACAAAGCTTGTCCTGTCCCGGTTCGAGTTTGAAGGAGTTACTAGTGGGGAG
AGTCCCCTAGAAGCTGGAGAAGATGAGGAAGAGGTATGGCTCTTTTGGAGAGACAGCAAT
AAAGAAACGCGAAGTAAGAGCATCAGGGAGCTGGCACAAGACGCTAAAGAAGGTCAGAAA
GAAGACCAGGATGTGCTGAGTTACTACAGGTACCAGCTGAACCTTTTTGCGCGCATGTGC
CTGGACCGACAGTATCTGGCCATTAATGAAGTCTCTGGCCAGTTGGATGTAGACCTCATC
CTGCGTTGTATGTCTGATGAGAACCTGCCTTTTGACTTGCGTGCCTCCTTCTGTCGCCTA
ATGCTTCATATGCATGTGGATCGTGACCCTCAGGAGCAAGTAACACCAGTGAAATACGCC
AGGTTGTGGTCAGAAATACCATCAGAGATTGCTATTGAGGACTATGACAGCAGTGGGACA
TCAAGAGAGGATATTAAAGAACGGTTTGCTCAGACAATGGAGTTTGTGGAGGAATATTTG
CGAGATGTTGTGGGTCAGAGGTTCCCGTTTTCAGACAAGGAGAAGAACAAGTTGACATTT
GAGGTGGTGAACCTGGCTAGAAATCTCATTTACTTTGGTTTCTACAACTTCAGTGACCTC
TTGCGTTTAACAAAGATCTTGCTGGCTATTCTGGATTGCGTACACCTGACTGCCAGTTTC
CCAACCAGCAAGATGGGCAAAGGAGATGAGAAGGGAGGCAGTAATGTGATGCGATCAATA
CATGGTGTAGGGGAGCTTATGACTCAAGTGGTGTTGCGCGGAGGGGGGTTTCTTCCGCTG
ACCCCTCTTGCAGCTCCTGAAGGAGTCATCAAGCCCCAGCGAGAGCCCGAGAAGGAGGAT
GTGCTTGTGATGGACACCAAGCTGAAGATCATAGAGATTCTGCAGTTCATTTTGAATGTG
CGTCTGGATTACCGGATCTCCTGCCTCCTTTGTATCTTCAAGAATGAATTTGATGAGAGC
AATGCACAAACTGGAGATGGAATTGGCTCCGATACTGCCACTGTGGTACCTGGGACTTTG
GATTTTGAGCACATTGAGGAACAAGCAGAAGGAATCTTCGGTGGAAGGAAAGTATTGCTC
TGTTATGGAAATTTGCATGTTAATGATGCAGTAGAATGTGAGGAGAACACACCACTGGAT
CTCGATGATGATGGGGGACGCACCTTTCTCCGTGTCCTCCTCCATCTCACCATGCACGAT
TACCCTCCTCTGGTTTCTGGGGCTTTGCAATTGCTCTTCCGACACTTCAGCCAAAGGCAG
GAAGTATTGCAAGCCTTCAAACAGGTTCAGCTTCTGGTCACCAGCCAGGATGTAGATAAC
TACAAACAAATAAAGCAAGATCTGGACCAGTTAAGATCTATTGTGGAGAAGTCTGAACTC
TGGGTCTACAAGGGATCTGGACCAGAGGATGCCCCAGAGGTGCAAGCAGGCACTGCCGGT
CACAAGGAGGAAGGATCTGGGAAGCCAATGAAGCCAGAGAGCACAAGCAGCTATAACTAC
AGAGTAGTAAAAGAGATACTCCTGCGACTTAGCAAACTATGTGTGCAGGAGAACACGTCC
GGGCGGCGGAACCGTAAGCAACAGCAAAGACTACTCCGGAACATGGGTGCCCACAGTGTG
GTGCTGGAGTTGTTGCAGATTCCGTATGAGAAGATGGAGGACACACGAATGCAGGAGATA
ATGAGGATCGCGCATGAATTCCTGCAGAACTTTTGTGCAGGAAACCAGCAAAACCAAGCA
TTGCTTCATAAGCACATCAACTTGTTCCTGACTCCTGGGATCCTGGAGGCTGTCACAATG
CAACATATCTTCATGAACAACTTCCAGCTGTGCAGCGAGATTAATGAGCGAGTGGTCCAA
CACTTTGCCCACTGCATTGAGACCCACGGTCGTAGCGTGCAGTATATAAAGTTTCTGCAA
ACCATTGTGAAGGCAGAAGGACGCTTCATCAAAAAGTGCCAGGACATAGTGATGGCAGAG
CTGGTGAACTCTGGCGAGGACGTTCTGGTTTTCTACAATGACCGCGCGTCGTTCCAGACT
CTGGTACAGATGATGCGTTCGGAGAGGGAGCGGATGGATGAGAACAGCCCGCTGATGTAT
CACATTCACCTGGTGGAGCTCCTGGCCGTCTGCACGGAAGGAAAGAATGTTTATACGGAG
ATAAAGTGCAACTCTCTGCTCCCGCTGGATGACATTGTCCGTGTTGTCACGCATGAGGAC
TGCATCCCCGAGGTGAAGATTGCCTATATTAACTTCCTTAACCACTGCTACGTGGACACC
GAGGTGGAGATGAAGGAGATTTACACCAGTAACCATATGTGGAAATTATTTGAGAACTTT
CTTGTGGATATCTGCAGGGTATGTAACAGTACGAGTGAACGAAAACATGCAGATCTGGTA
CTGGAACGTTACGTTACGGAGACTGTGATGAGCATCGTCAACACGTTCTTTAGTTCTCCA
TTCTCTGACCAGAGCACGACGCTGCAGACTCGGCAGCCGGTGTTTGTGCAGCTCTTACAA
GCAGTGTTCAGGGTCTATCACTGCAGCTGGCTCCTGCCTGCCCAGAAGGCATCAGTTGAG
AGCTGTATCCGGGTGCTGTCAGATGTTGCAAAGAGCCGTGCTATTGCCATCCCAGTGGAT
CTGGACAGTCAGGTGAACAACTTATTCCTGAAAAGCCACAATATTGTACAGAAGACTGCG
ATGAGCTGGCGCATGTCTGCCCGTAATGCGGCTCGACGTGACTCTGTGTTAACAGCATCT
CGAGACTATCGCAATATCATTGAGAGGCTGCAGGACATAGTGTCATCTCTGGAAGATCGA
CTGCGTCCTCTGGTTCAAGCAGAGCTCTCTGTACTTGTTGATGTCTTGCACCGTCCAGAA
CTTCTGTTTCCAGAGAACACTGATGCGCGTCGGAAGTGTGAAAGCGGCCAGTTCATTTGC
AAGCTTATACGACACACTAAGCAACTTCTGGAGGAGAATGAAGAAAAGCTTTGCATTAAG
GTTTTGCAGACTCTGAGAGAGATGATGGCAAAGGACAGAGGTTTTGGAGAGAAGGAGCTT
GGCCAGACCCAGCCTTTGAGGCAGCTGGAAGATGTCAGGAGGGGGGAAGCATTAAGGATC
ATTTTGGTAAATCGTTACTATGGGAACATCCGTTCGCCGACGAGACGAGAAAGTTTGACC
AGCTTTGGGAATGGTCCTGTGTCTGTAGGTTCTGGGAAGTCTGGAGGTGGCACCAGTTCA
GCGATCCTCAGTCGAGGGGAGATGAGTTTGTCTGATGTTCAATGCCACCTTGATAAAGAA
GGGGCATCCGATTTACATTCCTTCTTCTGCCGGCTAACGGAGGACAAGAAATCTGAGAAA
TTCTTCAAGGTCTTCTTTGACCGGATAAAAGTGGCCCAACAGGAGATTAAAGCCACAGTG
ACTGTAAACACAAGCGACCTCGGGAGCAAGAAACGTGACGAAGAGCAATCTGAGAGGGAG
ACTCCACACCGCAAGAGAGGCCGTGAGCCCAGTACCCAGATTACAGAAGAAGCCAAAGAG
CAGCTCTTGGAGGCATCTGTTGCCACAAAAAAGGCCTTTAATTCTTTCCGCCGGGAAGCC
GACCCCGATGACCACTTTGCGTCCGGAGATGGAAGTCTTGGGAACTCTGAAAAGAGCAGA
GATGAGCTTGAAATGAGTGCAGTGATCACAATCATGCAGCCTATATTGCGATTTCTGCAG
CTGCTGTGTGAAAACCACAACAGAGATCTGCAGAATTTCCTGCGATGTCAAAACAACAAA
ACAAATTACAACCTGGTGTGTGAGACCCTGCAGTTTTTGGACTGCATCTGCGGTAGCACC
ACGGGTGGCCTTGGCCTTCTGGGGCTCTACATCAACGAAAAGAACGTGGCCCTCATCAAC
CAAACTCTGGAGAGCTTGACTGAATACTGCCAGGGTCCCTGCCATGAAAACCAGAACTGC
ATTGCTACCCATGAGTCAAACGGTATAGACATAATCACAGCCTTGATTCTGAATGACATC
AACCCCTTGGGACGGAAGAGAATGGACTTAGTGCTAGAACTAAAGAACAATGCCTCAAAG
CTTCTCCTAGCCATCATGGAGTCTCGCCACGACAGCGAGAACGCGGAACGTATTCTCTAT
AACATGCGACCTAAGGAACTGGTGGAGGTGATAAAAAAAGCTTATTTACAAGGGGAGGTC
GAGTTTGAGGATGACGAAGGCTCTGAGGATCATGCTGCATCTCCTCGCAATGTGGGACAT
AATATTTATATCTTGGCACATCAGCTTGCACGGCATAACAAGGAGCTACAGCATATGTTA
AAGCCAGGAGGACAAACCGGGGAGGGAGATGAAGCACTGGAGTTCTATGCCAAACATACA
GCTCAGATAGAGATTGTCCGTCTTGACCGCACCATGGAGCAGATAGTGTTTCCCGTTCCA
AGTATCTGCGAGTTCCTCACCAAGGAATCAAAGCTACGCGTTTATTACACGACAGAAAGA
GATGAGCAGGGCAGCAAGATTCACGACTTTTTCCAACGCTCAGAGGATCTCTTCAATGAA
ATGAACTGGCAGAAGAAGCTGAGAGCGCAGCATGTCCTGTACTGGTGCTCACGCAACATG
ACCTTCTGGAGCAGCATTTCCTTCAACCTGGCCGTGCTGATGAACCTCCTCGTAGCATTC
TTCTACCCTTTCATTGGTGTCAAAGGAGGGACACTGGACTCGCGTCTCTCTGGCTTACTT
TGGACAGCCATGTTTGTGTCTTTAGCCATAGTCATTGTCTTACCTAAGCCACATGGAATT
CGTGCATTAATAGCTTCCACCATCCTACGTCTTATCTTCTCAATTGGCCTGCAGCCCACT
CTTTTCCTGTTGGGAGCTTTCAACGTTTGCAATAAGATAATATTCCTTACCAGCTTTGTG
GGGAACAGAGGCACTTTTACACGGGGTTATGGCGCAATGATCATGGATGTGGAGTTTCTG
TATCACCTGCTCTATCTGCTGATTTGTGCGATGGGTGTCTTTGTACATGAATTCTTTTAC
AGCCTGTTGCTCTTTGATCTTGTGTACCGAGAGGAGACGCTTCTCAATGTGATCAAGAGT
GTGACCAGGAATGGACGCTCAATCATCCTCACCGCCGTGTTGGCATTGATCCTGGTCTAC
CTCTTTTCAATTGTTGGGTATCTTTTCTTTAAAGATGACTTTATACTGGAAGTGGATAGG
CTGCCCAATGAGACAAACTTTCCAGTAGAGGAGCTATCCCAAAGTCTAGAGGAGGAGGAG
GAAGAAGAAAAGGAGCACACCTGTGAGACCCTTCTAATGTGCATTGTGACCGTGCTGAGC
CACGGATTGCGGAGTGGTGGCGGTGTTGGCGATGTTCTCCGGAAACCTTCCAAAGAGGAG
CCTCTTTTTGCTGCTCGGGTGATCTATGATCTGCTGTTCTTCTTCATGGTGATCATTATC
GTTCTGAACTTAATTTTTGGCGTGATCATTGACACGTTTGCTGACTTGAGAAGTGAAAAA
CAGAAGAAAGAGGAAGTTATAAAGACGACGTGCTTTATTTGTGGGCTGGAACGGGACAAG
TTTGACAATAAGACAGTGACATTTGAGGAACATATTAAGGAGGAACACAACATGTGGCAT
TATCTATTCTTTATAGTGCTAGTGAAGGTGAAAGATTCCACAGAGTACACTGGACCAGAG
AGTTACGTGGCGGAGATGATAAAGGACCGGAATCTAGACTGGTTCCCCCGCATGCGCGCC
ATGTCCTTGGTAAGCAGCGACTCTGAGGGCGAGCAGAACGAACTTAGAAATTTGCAAGAA
AAGCTGGAGTCTACCATGCGTCTCGTCACAAACCTGTCCAGCCAGCTGAGTGAGCTCAAA
GATCAGATGACAGAACAGCGGAAACAGAAACAGAGGATCGGTCTCTTGGGACAGCCCGCT
CATCTTAACATCAATCCCCAGCAGCCGGCGTAG
>g505
ATGCTTATCTTGCCTGACCTGGTTGTCATTGCTATTAGCTCACTTGTACAGCAATTATCA
GCCTCGCTCAATTTTTTCCATCACCGCTACGATGACCTGGTGAGAGCGCTGTTCAACGTA
CAAAATGAGTGTCCATACATCACCAGGATTTACAGTATTGGAAGAAGCGTCCAAGGAAGG
CACCTTTATGTCATCGAATTTAGTGATAATCCAGGGAGACATGAAATCCTGGAGCCAGAA
TTTAAGTATGTTGGAAACATGCATGGCAATGAGGTCCTCGGGAGAGAGCTCCTGATCCAA
CTGGCTGAGTTTTTATGTGAAGAATATCAAAATGGTAATGAGCGGATAACCAGGCTAATA
CAGGACACGCGGATCCATATAATGCCTTCCATGAATCCAGATGGATATGAAGTGGCAGCA
GACCAG
>g498
ATGTTTCTGCCTTTGGCTGAGAGAATGGTGGAGAAGATGGTGAGAGAGGACAAGATAGAG
GCTGAAGCCGAGGTTGAATTGTATTATATGATTTTGGAGCGCTTGGGGAAACACGAAGAG
GCTCTGGAGGTCATAAGAGGCAAGCTGGGAGAGAAGTTAACAAGTGAGTTGCAGAGTCGT
GAAAACAAATGTATGACGATGTACAAGAAGTTGAGAAAATGGCCGGAGTGCAATGCCCTC
TCCAAGAGGCTTCTCTTAAAAAACTCAGATGACTGGCAGTTCTATCTGTCCTACTTTGAT
TCCCTCTTCCACCTTGTTGAGGACGGCTGGACACCTCCAGCACAAGAGCAGATGTCACTG
GAAGGCGATCTGGACTACACATTAGAACAAGCGGCCCAGTTTGTGGAAGGACAGATAGCA
GCAGAGTCCAAGAGCCAACGCCAGCTCCGAGGGCCGCACCTAGCCAAGCTGGAGTTAATA
AAACGTCTGCGAAAGAGAGGGTGTAATAATGAGTACAAGCTGGGAGACCCAGAAGACCTG
ATGTTCCAGTACTTCATTAAGTTTGGGGACAAACCATGTTGCTTTACGGACCTCAAGATC
TTTATAGACCTTCTTCCTGTCAGCCAACACATGAGTTTTATAAACCGATTGCTGGGGTCG
TTACAACTTACTACAGCAGCTGCAGGTGAACTTGCGTTGCCAGAAGACATCAAGGCCTTG
CAGAGACATCTGTGTGTCGTTCAGCTCACCAGACTGCTTGGTATTTACCACAAGATGGAC
AAAGCCCAGAAGCAGGAGGCCGTACGTGAGATGACCGCACGATACCGGCATGGGCTAGTG
TTTGGTGAAGAGTGGGCTGTGTGGCATTGCTTAACTCTGTTAGAAGAAGGGTTAAGTAAC
AGCTCATCAAATGCCCAGTTTAAACTGCTACTTATTCGGATTTACTGCGCCCTGGGAGCA
TTTGAACCCGCAATGGAGCTCTACTCCAGCCTTGACGCGAAGCACATTCAGCACGACACC
ATTGGGTACCTGCTGACCCGTTTTGGAGGGCCCTTGGGTCACTACACATCTGCGTCTCAA
GCCTGCAACGCTGCTCTAAGGTTTTTCCACTCCAACCAGAAAGATACCTCAGAATATATC
ATTCAAGCATACAAGTATGGGGCATTTGAGAAAATCCCAGAATTCATTGCTTTTAGAAAC
CGACTGAATAACTCTCTTCACTTTGCACAAGTGCGGACCGAACGAATGTTACTGGACCTG
TTTCTTGAAGCCGATATTAGCTTAGAAGAAAATGTAAAGTCCATGAGCCTGAGTCCAGAA
GAGGATGACATTCCATGGAAGGATCTTCGAGATAACCGGGACCTGACTGTTCTCTTTAAT
TGGGATCCAACGGACAGAAACATTTCTGATGAGCATAGGCAGCTTTCCCTGGAGGAAGAG
CGCATCTGGCTGCTGATCAGGTCACTAACGTTACGGTTGGCTTGTGGACTGCCTACAATA
AGCCATTCATCTGAGCCCAAGAATTCTGAGAAGACTACTGAAAATGGTGTCTCCTCCAAG
ATTGATACAGTTCGAGCCTTATTAAAACAGTTTGAAGTGGCAGTGAATTCAGGCATGCAG
TTTAATGAGAGAAAAATTAAGTATCCGTTCATTGGTCCTCCTGAATCTCGGCTGAATGGA
TTCCTAGCAAGCGGCAGCTGCCAATGTCAGACAGGCACTTTTCTGCTTGTGAACGATATT
TACGATTTGGACACCAACGGTGTAGAGGATACCTCTGGCATCCAAGAGAAAATCGGGAAC
AAGTTAAAATCTTCTCTGGAACGTTTAAAAGATCTTTTTAACCAGTGTAAAGGAGACTTG
ATTGACACCCAAGGAGGACAGTGCAGAGCTTTCCCTCGCGTTATAGAAAACTTGGCCTTC
TTTGTTGAGGTCAGTTAA
>g504
ATGGCTTCGCTGGACCCAGCGACTGCGTCAGATCGAGGCTCTCAGGAGATGGAGGAAGCT
GAGGCCTGCGGGACCCCCGAGGGGCGGAGAAACGGGCGGAGGAAGAGAAACAAGACTATT
CCAGTTTGGGAGAACAAGCTTTGTGGTGCTTCACGCAGTCTTGTGAGGAGAATTGGGTCT
CATCTACCATTGAAGCCCTGCCCCAGAGCTTGCTTCGAGGCCTTGCCAAGCGCTTCAGAT
CTCTATTTTACTAATGCTCCCATGGTCCCTACCCTCGCTGATATAAAGTGGATCGCTGCA
GATGATGATGAAACATATGCAAGAGTCAGGAGTGACACAAGGCCACTGAAGCATAAATGG
AGGCCAAGCCCACTTCTGGTGATGCAGAGAAACGCGTCTGTTCCCAATTTGAAAATGAAA
GAAGATAGAATGTTTTGTTTAAAGAAGCCTGGCGCGTCTCTAAACAGATCTGCAGACTTA
CAAGACGAACTGAGCTTTCTAAGGAGTCAGATCGCGAGAATTGTCGCTACAGACACAGCA
TCACCATGCAACACATCAAATGCTCTACCTGAGAATTTGGAACTTGATCCCTCCTTCGCT
GACTTTGGCCCCTCTTTCCAGTCGAACACTTCCTTTGTTATTAGCGACATCACAGAAGAA
GATGAATTAGATGTGTCTGAATACTCATCAGCTTCTCTTGTTGATTCTTCAATCAGTCAG
CAGAGGCATATCGAGGCAAATGTGTCCGATGATGAGGAGGACTCTCTCTGCCTTTCAAAG
TCAAACAGTTTTGCAGACATGATGGGAATTTTGAAAGATATTCACAAGATGAAACTAAAC
AAAGACTGGTCCAGCAGAAGCCAGTATTTACACAAAGAGGATGATCCAGTCAATCTTATA
TCTGAAGTTTTAAAGCAAAAATTTGCACTTTGTGACCAAGGAGAGGTTAAAAAGAGCATT
TAA
>g517
ATGGAGCCCTTCGATATGTGGAAAGACTACCTTGGACTGGACAAAGTGGTCAAGGAACTG
GCCGCGCAGGCGTCACTGACCAGGACTGCGACAGACAGAAGCAGGGAGAGGACGGCGGCC
CCCGAAATGCTTTCTGGCAGCCACGAGGCCACCATTCCTGGCCCCCCGCACAACGTCTTT
GCCCCCCCGACACAATCAACACCTGCCCCAAGGGAGGGCGGCGCGTCCCTCTGCTCTTTC
TGCAAACATAACGGGGAGTCCAGGGCGATCTACACTCAGCACGACCTAAAAGACGGAGCG
GGGAAGATCCAGTGCCCCATCCTGCGCAGCTACGTCTGCCCGCAGTGCGGGGCCACGGGG
GACAACGCCCATACCCGCCGCTTCTGCCCCCTCACCGGCAAAAGTTACACCTCTGTCTAC
CAGTCGTCTCGAAACGCGGCGGGCAAGAGGATGAAGAAAGACAGATAG
>g510
ATGGCGCCTCCCAGTCCCAGTACAACTGGCAGCAACAATAACAGTAGCAGCAGCAGCAGC
AGTTCAGGATGGGATCAGCTAAGCAAAACGAACCTCTATATCCGAGGACTGCTTCCAAAC
ACCACAGACCAGGACCTAGTGAAGCTGTGTCAACCGTATGGAAAAATCGTCTCCACAAAA
GCTATTTTGGATAAGACAACAAACAAATGCAAAGGTTATGGATTTGTAGACTTTGACAGC
CCCGCAGCTGCTCAGAAAGCGGTCTCTGCTTTGAAGGCTACTGGAGTCCAAGCGCAGATG
GCAAAGGTGGAATCCCCAGCAGATTACCTGGTGGAGACATTGTGGACAGATGGCTTTCGC
CTGACGTTCTCTGTGTTTGGTGTGGACTATGACAGGTCCTAA
>g506
ATGTTCAGTTTTAACTCCCCAAAGACTGTTGCAAAACAGAAGAAGACATGGCACAAGAAG
GTCTTTTTCATCCTAGGAGTTCCGTTAGCCTTGGTGGTTATTGCTTTAGTTATAACTGCT
GTTGTGCAGAATAAACCTCTCCCAAAGAATATTAAGTATGGCATTGTGTTAGATGCTGGC
TCCTCTCATACCAGCCTGTATATATACAACTGGCCTGCAGAGAAAGAAAACGATACCGGC
ATTGTTAAACAAGTGGAAGCGTGCAAAGTTGAAGGGAATGGTGTATCTAGTTATTTCAAA
GAGCCCGTCAAGGCCGGGCTTTCTCTTCAGACGTGCATTAACAAAGCCAAGGAGGTGATT
CCACAGAGTCAGCACAAGGAAACACCAGTTTATTTAGGGGCAACAGCTGGGATGAGATTG
CTCAGGCTAGCTAACCACTCATTGGCTGATGAGGTCCTGTCATCGGTGGAGAACACTCTG
CGTTCCTCTCCCTTTGATTTTCAGGGTGCCAGAATAATCACAGGGCAAGAAGAAGGAGCA
TATGGGTGGATTACTATTAACTATCTGTTAAACAACTTTATACAAGATTCAAGCAGGTTC
AACATTTTGCCAAATTTTAAAAAGGCTGAAACGTCAGGTGCTCTGGATCTTGGAGGAGCC
TCAACACAGATTACTTTTGTATCCAATGAAGAAATTGAATCTCAAGAAAATTCCTTGCAC
TTCCGCCTGTACGGTAAATCGTACGATGTCTACACGCACAGCTTCCTGTGTTACGGGAAG
GATCAAGCCCTTCGGCTGCATCTAGCGGAAACCATACAAAATGCAAACAATGACACCCTT
TTAGATCCATGCTTTAACTCAGGATATAGACGGAATACGAGCACAGCTGACCTGTACAGC
AGTCCCTGTGTGTCTGAACGCAGAGCGCTTGCTGCACCAATGAACTTTGAGATAAAGGGG
ACAGGAGATTACGACCTATGCAAGAGAAACATTGAGTCAATCTTCAACATGACACAATGC
ACTTATTCTACGTGTTCATTTAATGGTATTTTTCAGCCAATGCTACAAGGGAAATTTGGG
GCATTCTCTGCTTTCTTTTTTGTGATGGATTTTTTAAAGATCAACAAGGAACAGGTCTCT
CTTGATGAGGCTAAAGAACGGGTCCGAAAACACTGTTCCAGACCTTGGGATGAGGTAAAA
GCAGAATTCCCAAAAATAAAGGTGAAGTATCTTAGTGAATATTGCTTTTCCGGAGCCTAC
ATCTTAATTCTCCTTGAATATGGATATGGCTTTACAGCAAAAAATTGGAACGATATCAGC
TTTTTGGGAAAGATCGGTGGAAGCGATGCTGGGTGGACTCTGGGGTATATGCTAAATCTG
ACCAATATGATCCCAGCTGAGTTGCCTCCATCTCCACCACTGTCTCACGGTGGTTATGTT
GGACTCATGGTGTTCTTCTCCATACTTTTGTTTTTCATCCTTTTGACTTGCTGGTTATGC
TTCCGAAAACCATGTCTACAGAAAGGGATCATCTAG
>g514
TTTTTGGACCATGTAAAGGCTGGTATTGAAGATGTCTGCGGGCATTGGGGACACAACTAC
TGCAGAGACAAATTTAAAAAGTTTGACAAGTATCTGCGAAAACTTTTGATTCGGGATAAT
GAGCCAACATCGAGTATAGTATCGCTATATAAAAAGCTGGAGATAAAACAAGCTATTGAG
ATGGCAGAGACAGGCATGAGCAGAGATCCATCATTGTCATCCCTGGTAACCTTTGAAAAA
CAGAAGGTGAAACGCCTTTCCCATACTGAGGTGAACGAAATGCGAGATATGTTAACAAAG
AACCTATACCAAATACGCCAACGGACACTTTCCTATAACAGGCACAACCTTGCAGCAGGG
ACTAATGAAAAACAAGCCAAAGAAATACTTATTCGCCGTCGACACAGTATGAGGGAGAGT
CTGAAGAAACATAACAGCCTTTTGTCAAGGACCAGGCCAGCGACAACTCACCATGCACGA
TACTTGTCGCTTCCTGGTCATACCAAGCTTTCTGACGCACCAATTGAAAGAAAGACAACA
TCTTTTACAGTTGGAGACACAGATTCTGACCAGGGTGACTCTGCCCTAGAACTAAACTTT
CATCCCAGAGCAGCAACGATCCTACAAGAAGAAAGAAAAAAGCGGAAGCCCTACACCAGT
TTTGAGTGGAGAAATGAGAGAGAAATGCATGATAATGACAAAGAAACGCATGCATTAAAC
AAAACTCAAATGCCTACTGGTTTTCGAGAACCTCTTTTGCCCAAGGCAAGGTTTGAAACT
TTAAGGGAGGACAAGGGACCAGACATGGAAAACATAGCACCATTGCCACCGCCTCGAACC
AGACGAGCCTCTGAAGCGGAGAATCAGAAAAGAAAATACAAAGATACTAAACCGCACCCA
AGGCCACCCAAATATTAA
>g513
ATGGCTCACGAAATCGGCCACAATTTTGGCATGAGCCACGACAATGATGGCTGCTGTGTG
GAGGCCACACCAGAGCAAGGAGGCTGCATTATGGCGGCTGCTACTGGACATCCGTTTCCG
CGCAAGTTCAGCTCGTGCAGTCAGAGGCAGCTGCGGAGCTACTTCCAGAAAGGTGGCGGC
ATGTGCCTCTTCAACATGCCCAACACCAAGGACCTGGTGGCCGGCAGGAAGTGCGGGAAT
GGCTTCCTGGAGGACGGGGAGGAGTGTGACTGCGGGGAGCCGGAGGAATGCACCAACCCG
TGCTGTAACGCCAATAACTGCACTCTGAAGGCAGGGGCTCAGTGCGCCCACGGGGACTGC
TGCCAGGGCTGCCAGCTGAAGGCGGCGGGGACTCTGTGCCGCGAGATGTCCGGGGCATGC
GACCTGCCCGAATACTGCAAGGGAGATGCGCCTTATTGCCCCCCTAACGTCTATATGCTG
GACGGCTCCCCCTGCGCCTACGACGAAGCGTACTGTTACAACGGCATGTGCCTGACTCAC
CACCAGCAGTGCGTGGACCTCTGGGGCCCAGGTGCACTTCCGGCCCCCCACAGCTGCTTC
ATAGCCGTCAATAAAGCCGGTGACAAATACGGGAACTGCGGCAAAAGAGGGCAGGACCAA
TACGTGTCGTGTAGGACTGAGGACGCCAAGTGTGGGAAGATCCAGTGCCAGAGCAGCGCC
CAGAAGCCTAGGGACCGGGGGATGGTCCCGATGGACACCACGATCCGGCACAACGGCTAC
GAAGTGAAGTGTCGGGGGACGCATTCTTACTCCGTCCAGGAAGACGACGGCGACTCTTCG
GACCCAGGACTAGTGATGACCGGGACCAAGTGCGGAGACGGCAGGGTTTGCCGGGATGGA
AGATGCCAAAACGCCTCCTTCTTTGAGTACGACAAGTGCATGTCGCAGTGCAACGGGAAC
GGGGTCTGCAACAGCAACAGAAACTGTCACTGCAACTCCGGCTGGGGACCCCCGTACTGC
GACAAGCCGGGCCAGGGGGGCAGCGTGGACAGCGGGCCCGTCACCGAGAGCTTTCATGAA
GGTCTCGTGGTCTTCCTGCTTCTCCTGTTTCTCGTCTTCCTGCCTCTGGTGGCTTTCGGG
GTCTTCTACTGGTATCGGCAGCCGGGCTCCAGCTTGAAGAAGTGTCTGAATAAGAGCAAA
GCCAAATGCGGTTTGGGAAGAGCCACCCAGCAGAAGAGGCATGGAGGTGGCGCAGGCACC
GTCTCCACCTTGTGCAGTTTCCCGACTCCCGGCAGATCCCAGAACGGTGCCTGGGGGGCA
TTCCAAGGAAAGGCTGCGGCTTCCCAGCCGGTGAATATTGTGCGCCCTCTCCGTCCTGCC
CCCGGCCCGGTTACCAAGCCCTCTACAGAGTCAAAACCACTGAGACCTCCTCCACCCAAC
CATCAACCAGCGAGACCTCCTCCCGTGTCACCTGTCATCCACCACAAGGAAGGCACAGCG
CACGGCAAGCTGCTCCCACCCAAGAAGCCTCTCCCCACGTGCCCCGTCAAGACCCCTCAG
>g520
ATGGCAAGCGACCCCCCGCCTCCCTACCCCGGGGGTCCCACGGCCCCGCTGCTAGAGGAG
AAGCACGGAACGGCTCCCGCGGAAGGGAACATACATCCCCATGGGGGGTACCCGGCCGGC
ATGCCCTATATGCCCCCAGATTCAGGGCCTCCTCCGTATGAAGCCAATCCTGGATACATC
GCCCCAAACCCAGGTATCTACCCTCCGCCGGGGCCTTACGCGCCTATGGGGTATTACCCA
CCCACAGCTGGGCCCTACCCTACAGAAGGACCGTACCCAGCTCCATACCCATCACCCGGC
ACCCATGCCACCACAGTGATCATGCCTCCCGGAGCGAGCGCTGCCTCTGCTGCCACCACA
GTGACGGTCCTTCAAGGAGAGACCTTTAACAGCTCCCCGGTGCAGACCGTTTGCCCGCAC
TGCCAGCAGCCAATCATCACCAAGATTTCCCACGAGGTCGGACTCATGAACTTCCTGCTC
TGCTGTTTCTGCTGCTTCGTTGGGTGTGACTTGGGCTGCTGCCTTATCCCGTGTATGATA
AATGACCTGAAGGATGTCACCCACAGCTGTCCGAGCTGCAAGGCCTATATCTACACCTAC
AGAAGGATGGGTTAA
>g507
ATGGTCATGGCAATATATTTGTATCCTCTTCTGGAAATCCTAGATGCCCCTTCTTCTGCC
CCCACCCGGCACTGGAGCAACATCCCCTTCATTACGATGCCCCTCATTCGCTCGCATGGA
AAGCCGTTTGCTCACCGCAGCGAGCTGAAGCATGCCAAGCGCATCGTTGTGAAGCTTGGG
AGTGCCGTTGTCACTCGTGGAGATGAGTGTGGACTTGCCCTCGGACGGTTGGCATCTATT
GTAGAGCAGGTTTCAGTGCTACAGAACCAGGGCCGTGAGATGATGATTGTCACCAGCGGA
GCTGTGGCTTTTGGAAAACAGCGTCTCAGACATGAAATTCTTTTATCTCAGAGTGTGAGG
CAAGCTTTACATTCTGGCCAGAACCAGCTGAAAGATATGCAAGTTCCAGTGTTGGAGGCA
CGAGCGTGCGCGGCTGCTGGCCAGAGTGGACTTATGGCTCTGTACGAGGCCATGTTTACG
CAGTACAGTATCTGCGCTGCCCAGATCTTGGTAACAAACTTGGATTTCCATGATGAGCAG
AAGAGAAGAAACTTAAACGGCACCTTGCATGAGCTCCTGCGCATGAATATCGTTCCCATC
ATTAACACCAATGATGCCGTTGTTCCACCTCCCGAGCCGAACAGCGATCTGCAGGGGGTT
ATTAGTATCAAGGACAATGACAGCCTGGCTGCTCGGTTGGCCGTCGAGATGAAAGCAGAC
CTAATAATAGTATTGTCTGATGTGGAAGGTCTTTTTGACAGCCCTCCTGGGTCAGATGAC
GCCAAACTTATAGACATTTTTTATCCTGGGGATCAACAATCTGTAACGTTTGGGACTAAA
TCCAGAGTTGGAATGGGAGGCATGGAGGCAAAGGTGAAAGCTGCTCTGTGGGCCCTTCAA
GGCGGAACCTCTGTCGTCATTGCGAACGGAACTCACCCCAAGATATCAGGACATGTGATT
ACAGACATTGTGGAGGGGAAGAAAGTAGGCACGTTCTTCTCCGAAGTGAAACCTGCTGGT
CCCACTGTGGAACAACAGGCTGAAATGGCCCGATCTGGTGGCAGGAACCTTGCAGCGTTG
CAGCCGGAGCAGAGAGCCGAGATCATATTCCACCTTGCTGATTTGCTGACGGATCATAGA
GATGAGATTCTTTCTGCTAACAAGAAGGATATGGAAGAAGCAGAGGAAAAGGGAAGGTTG
GCTTCTCCGCTGTTGAAACGTTTAAGCCTGTCGACTGCAAAGTTGAACAGCCTGGCCATC
GGGCTACGGCAGATCGCCGCCTCTTCCCAGGACAGTGTAGGACGTGTCATCCGTAGAACG
AGAGTTGCCAAAGATTTGGAGCTGGAGCAGGTGACCGTTCCAATTGGGGTCCTGCTGGTT
ATTTTCGAGTCTCGACCAGATTGCCTTCCACAGGTTTCAGCTCTGGCTATTGCAAGTGGG
AACGGCCTGCTGCTGAAAGGAGGAAAAGAGGCTACTAATAGTAACCAGACCCTTTACCGT
CTGACTCAGGAAGCCCTGGCCCTTCATGGCGTTAAGGATGCAGTTCAGCTTGTAAACACA
AGAGAAGACGTTGAGGATTTGTGCCGTCTTAATAAGCTAATTGACCTTATCATTCCACGA
GGCTCATCACAGCTGGTCAGGGACATCCAGAAAGCAGCCAAAGGCATTCCGGTGATGGGA
CACAGTGAAGGGATATGCCACGTGTATGTGGACAGTGAAGCCAGCGTGGAGAAGGTTACA
AGGATTGTACGAGATTCGAAGTGTGAGTACCCAGCAGCTTGCAACGCGTTGGAAACTTTG
CTGATCCATAGAGATGTGTTGAGGACACCTTTGTTTGATCAGATCATCGATATGCTAAGA
GTTGAACAGGTGAAAATCCACGCAGGTCCCAAGTTTGCCTCCTATTTGACCTTTAGCCCA
TCAGAGGTGAAGTCCTTGCGTACAGAATATGGAGACCTGGAGTGTTGCATTGAAGTGGTG
GACAGTGTCCAAGATGCCATTGAACATATTCACAAGTATGGAAGCTCTCATACAGAAGCA
ATCATCACAGAGAATGAAAAAACGGCAGAATATTTTCTTCAGCATGTTGACAGCGCATGC
GTCTTCTGGAACTCCAGCACCCGCTTCTCAGACGGATACCGTTTTGGACTTGTCCAGAGA
TTCAATTTTTTCTAG
>g525
ATGGATATAAAAGATCGAAGACACAGATCTTTGACAAGAGGACGTTGTGGAAAAGAATGT
CGATATACCAGCTCCTCATTGGATAGCGAGGACTGCAGAGTACCTACTCAGAAGTCCTAC
AGCTCCAGTGAAACATTAAAGGCTTATGATCATGAAAACAGAATGCATTATGGGAATCGT
GTTTCTGACCTAGTTCACAGAGAGTCTGATGAATTTCCAAGACAAGGTTAA
>g529
ATGGAAACAGGTCCAGCAGAATACTGCCTTGAAGCCATGCCTCTTCCAGATACCATGTTT
TGTGCACAGCAAATTAATATCCCACCTGAGCTCCCAGATATCTTGAAACAATTCACAAAA
GCTGCCATCAGGACCCAGCCTCGTGATGTGCTCCAGTGGTCAGCTGCGTACTTTGCCTGT
TTATCAAAAGGTGAGCCCTTACCTGTAAAAGAAAGGCTTGAAATACCAGTGGCAACTCAA
AAAACTGACACTGGGCTAACTCAAGGGCTTCTAAAGGTTCTACACAAACAGCTATCATCC
AAGGCCGTTGTAAGTGAAACTGATCTTGAAGAAAAATGGAAAGATCTCTGCTTACCTCAA
GAGCAACTGCAATGCATTCTGACACTGGATAACTTCGGAAATGAAGTAGAATGGATGAAA
TTTCTAGCTCTTGCCTGTAGCACACTTGGAGGGAGCATATCATCTGCTCTGAAGCATGCC
TGTGAAATACTGACAGAGGATCCAGAAGGTGGTGCTGCTCGCATTCCTTTTCAAACATTC
ACTTTCCTATACAAGTATTTGGCCAGAATAGATGGAGATATTTCACATACAAAAGTGGAA
GATGCACTCTTTGCTTTGCAGGCAGATGCGTAA
>g515
ATGAGCGGACGGAGAGAAGCCCGGGGCGGAGGGAAAGGCACCGCTCCTAAAGGGGCACCG
TTCCTCTTGGATGGATTCCTTGGAAACGGCGACTCGGAAGATGAAGGAAGTTTGGAGGCC
GAGTTGCTCGCTCTGACCGGAGGCCGTCCAGCTGGGGGCAAAGAAAAACCCAAGGGGAAA
ACCCCCTTGCCTATGGAGCACATTGAGAAGATGGCAGCTTTGTGCATGCAGGACCTCGAT
GAGGAGGACGGCGACGAAGATATGGAGGACGACGAGGATCTGCTGGCGGAGTTGGAGGAC
GTTCTAGGAGATGAAAAAGAGGAGCAAAGTATTCTCTCCAATACTTCTCAGACCGCGTCG
AAATCCCCCCAGCCCGCGACCTCCTCAGACGGCAGCATGGAGGACGCGCTCGTGGAACGG
TTAAGCATGTACAGGGAGGCGCTGACTAACGCCAAGCAATCCGGCGAGGGAAGCAAAGTC
AGGAGATACGAGAGAGGGGTGAAGACTCTGGAGGACCTGCTTCGGACTGTCAAGAAAGGC
AAGTCTGTCTCTCCTGAGGACATCCCTCCTCCAGTGGCCTTGGGGAAGGCCCAGAGTCCT
CCTGTGCCGTCGCCTACGTCCCTAGTGTCACCGGACCCACCGGCAGAGCAGCCCCCGGCA
GCGCCTGTGAGCCGACTGCCCCCTCCAGTCCCGGCGCGGACTAACCTTCCGCCTCCTGTT
CCTGTAAAGCACCAGAGCCCCCCCCAGCCCTTGATACCGGTGACCTCCAGCTCAGTGGCC
GCGCCGAGCCCAGGGTCCGACGAAGACAGGACGCGAGTCCTCGAGCGCCAGAGAGAGTAT
AAACTGGCAGCCTTACGCAGCAAGCAACAAGGAGACTCTGACATGGCCAGCAAGTACTAC
CGCTCCCTGGATTCCGTGCTGTCATCGCTGGATTCTGGACAGAAGATGGATCCGCAATCC
CTGCCCCCTCCTCCAGGCCCCCCTGCCCCTCCCCGGGACACGTTGGATGCTCTGCAGCAG
AGAATGGAGCGTTACCGCAGTGCTGCAGAGCAGGCGAAAGGCAAAGGGGACGATCGCAAG
GCCCGGATGCACGAGCGCATCGTGAAGCAATATCAGGACGCCATCCGAAACCACAAAGCC
GGGAAGCCGGTCAACCTGGCAGAACTGCCTGTGCCCCCTGGCTTCCCTCCAATCCAGGGG
TCAGAACCACAGAACCAAGAACAGAGCATCGTAGGAGTGTTGGAGACCGCCATGAAGCTG
GCCAACCAGGGAGACGGAGGTGGAAGTGATGATGACAGCGAAGATGAGAAGGGATCAGCG
AATAAAATAAAAGCTGCTCCTCATTCATTGCCAGCTTCCCAGCCCCAGTCAGCCACTCAG
AAAGTCTCCCCTTCCAAGAGTCCGAAACCCTCCGGCAAAGCCCAGCAGCAGCTCGAGTTC
CTCGAAGGCCGGAAGAAGCAGCTGATGGCTGCGGCCCTTCGCTCCAAACAGCATCGGGAT
CTGGAAGGCGCCAAGATGTTCCTGCGGCAGGCCAAAGGCTTGGAGTCCATGATCGAGGCT
GCGCGCGGCGGGCTTCCCGTGGACATCAGCAAGGTGCCGTCAGCCCCGGTACGCGAAGAG
GATTTCACCCTGCAGAGGAAAGGGGGCGCTTCGTCTCAGAATAGCGAGATGTACCTAAAA
CTGATGGAGAAGTTAAAGCAGCAGCATGAGATGTGCATGTCGTATTCCCAGCAGTTCACT
CACCTCGGGAACATCACGGAGACTGCCAAGTACGAGAAGCTGGCGGATGAGTGTATGAAG
TACATTGAATTACTGAAGCAAGCTCATTCCCGGGGTCTTCCCGTCCCTCGCTATCACCAC
GAGGAGAGGACCGTGAGCATCGTCAAGATATTCCCGGAGCTGAGTAACTCGGACCTGGTT
CTGTTCGTGACGAGAGCCGTTAACCTCCCGGTTCCTGCAGGGACGTCTCCTCAAGACATG
GACACCTTCGTGCGTTTCGAGTTTGGCTACCCCAGCCTGGTAAGACTGTATAAGGAGAAG
TTTACTTTACAAATTAACCGCAATCACCGAGGTCTGAAGAGAGCGATCCAGGCAAAGGGC
ATGAAGTTCGAAGTTGTGTTGAAAGGGGGTCTCTTTAAGCAGGACCGCACGCTGGGGACG
TCTCATCTGAAGCTGGAGGCTCTGGAGTCTGCGTGTGAGATCCGGGAAATATTGGAGGTC
ATGGACGGACGGAAACCCACAGGCGGGAAGCTGGAAGTGTGCGTCCGGGTCCGGGAACCC
CTCACATCGCAGCAGCTGACCAGCAGCACCGAGAAATGGCTGGTTATAGAGCCTTTCACG
TTACCGCCGGTCTCTGCTCCGAAACCCAAACAGCCGGCCCCGGTGAAGTCGCCGGTCAGC
AGTGTCCCCACGCTCTACTGTTTGAGCGTTTTGTCTTACGAGAAGGAGAAGCTGGAGAAG
AAGGTGCACATGTACAGGCAGCAGCGTCACATGGTTCCTGATGACCTCATTGCTCAACTC
AACGATGTCACACATCGTAGCCAGCAACAGATCATGCAGCTGCGGCAGGGGGGACCATCT
ATCCGAGCCGAGTACGTTCGCCAGCTAAATCGCTACCTGCAGTTTTATGGCGACTCGGCA
CGCCGCCTCGGACAAGAAGGAAACCGGGAGGGAGCAAAAGAAGCTTTATACAAGAGAAAT
CTAGTTAACAATGAGGTGGGTGACGGGTGTATGTGGGTTCCCATAATATCGTTTATAATC
ATTTCCAGCGATCTTCAGACTCCTCAGAAAGTCCCAAACGGCCCCAAATCTGTCTTATTT
TCCAGCTCCAGCGAATGA
>g518
ATGACTTCGGCATCCGCCGCCCCGGAGAGCTGCAGCCATGTGTTGGTTGAGTTTGACTCC
CTGGATCCTTTGCTGTCGGCTCTTCGTTTGGATTCAAATCGCTTAAAGGAAGGTGGAATC
TTTCGGGTTGCGATTTGCCCCCATGATGAGGATTACGTTGCCGTGGCTACCAGCCAGGGA
TATGTGGTGGTCTGGGAACTGAACCACGAGCGTCGCGGGAAGCCGGAGCGGATTTACGTC
TCGTCGGAGCACAAAGGCCGGAAGGTGACCGCCCTCTGCTGGGACACGGCGGTACTGCGC
GTCTTCGTGGGAGACCACGTGGGCAAAGTGACCGCCATCAAGTTACATTCCTCCAAACAG
GGAAAGATGGATTATTTCGATGGCCGATTGCTGATCTCGTCTCTTGCGCGATCGTATTTA
TGTGATACGGAACGGGAAAAGTTCTGGAAAATCGGCAATAAGGAGAGAGACGGCGAGTAC
GGGGCTTGCTTTTTCCCTATTGGCAGAAGCCTTGTGAACCAGCCGCCGTTAATATACTGC
GCTCGCCCCGGCTCCCGCATGTGGGAGGTAAACTTTGAAGGAGAAGTTCAGAGCACCCAT
CAGTTCAAGCAGCTGCTGTCATCACCACCTCTGCCGGTCATCAACGCACGGTCGGACCCT
CAGTACGACGCTTCTCCGGGTCCCTCCCAGTCTCTGGCGTTCCCAAAACTTGTGTATTTA
AGTGAGCTCAGCATCCTGACCTGGACAGAAAAGGGAATTTACATTTTTCTTCCTCAAAGT
GTCCAGGTTCTACTCTGGAGTGAGGTCAAAGAGATCCAGGACGTCTCTGTGTATAAGAAC
GAGCTCTTTTGCCTCCACCTGGACGGGAGGGTCTCCCACTTCTCCCTGTTACCTGTGGAG
AGGTGCGTCGAACGACTGATTAAGAGGAGCTGCTGGGAGACGGCGGCCAAAGTCTGCCAC
GTTTTCCAGAACGCCATTACTTCCGGCAGGGCGAGGAAGGTATTGCCCATCGATAGGCTG
GAATATCTGAAGGCGCAGCTGGACCTCGTAACCCAGCGAGACGCCATCACCCAGCTGGAG
GAGCTCATCCCGAAACTGGAGCCCACGGGCTCTGCCTGCAGCAGCCGCCGGAGCAGCATC
ACCTCCCACGAGAGTTTCAACGTGTTGGACTGTGGGATCTATCAGGTGATCAGCCGTAAG
AACAGCCAATCCGATGAGGACTCTGCGTCTCTGCACAGCCAATCCCTGTCCGAGGACGAG
CGGCTCCGGGAACTCTCCTTCCAGCCGGATCCCGAGCAGAGCGCTTCCGACGGCGTGTCT
CATGTGTCCGTGCCGGCTGAGAGTGATCGGAATGAGACCCTGCTCCCATTCACCATCTCA
TTACCATTCCGCTCCACTTCGCCCCGCGTCTCTCTCCAGGCGGTTAAGGAAAGCGTGTCC
AGCTTTGTAAGGAAGACGACCGAGAAGATCGGCACCCTGCACATGAGCCCCGATATCCGA
GTCCGGCACGAGGCGAAGGAAGAAGAACGACCCGGGGAAGCGGCTGCTCCGGAACCATCG
GAACCAGAGGAGGAAAAACAGGGAACTGAACCTGCCCCGCTGTCAGAAGAAGAAATCCAT
CTTGAAGACCTGAAAGCTGCGACTGCCGAAGCCGTATTCAAACTTCAAGATTCCCAAGTT
CTGTTCAGTCCGGAAGCCGTCGGGAACGTCTTACAGGGTTGGCTGCCTTACTTGGAGAAG
ACATTTAAGAGTGAAGGCCATCTCTGTGACCAAAGACCGTGTGATGCTCCTCCGGAGACC
TGTCCACCTTCTACCGAGGCTGTTGGAGAAAGCGACCCTCTCGTACGGCCCGATACCGGT
GAAGGAACTCCAGATGCCCCTCGCAGAACCGAGCAAGAAGAAAAGGCCTCTTTTTGTGTC
CGGGCTCCGCGTGCCTTAGAAGAATGTTTACAGAGGGACTTGTCCCGATTAGCCATGTTA
TGTTTGGAATTCAAAGTGTTTCCCGGAGAGAAGGACTGTTTGGATCCAGACTCTTCGGGG
GTTAATACCCTCGCCTGTCAGTTCATACAAACCTACTTCTTTCTTCTGGACTTAAAGAGA
CTCAAACAATGCATCGTCTTCAGCTATGGTGACTGCCCTATAGTATGGGACACGTACATG
GAAGGGTTAAAAGAACTGGTCGGCCCGAGTCCGCTGGATTTAGCACTGGAAAAAGAAGAT
TTGATGAGTTCTGTTCGGATATTAAGCGACTTGGAGCCTTGGGATAGCCCCTTCCTACTA
GCTCATGCCTCCAGGATTTATGGAAGGTTTGGGGAGCGCGCGGTGAGAATGTACACCAAG
TTCTTCCCGTCCATCCAGCCCGTGGACGTCGCGAGGCTCTGCAGGGCCCAACCCCGGCAC
TTTTTGGTTTATCTGGACAACCTCATTAAATCGAAACCAGAGGAACAAAGTGATACTGAA
ACGAAGAATCTTTGCGTCTCTGTTGACAGATCGTCTTTACTGCAGTCTCTTGCGCAACCT
GAGTCTCTAAAACTGGATTGGCTGTTGCTGGCTCTTACCCACGATGCACCTCAGGCCAAA
AACCTGGCGGATCCCGCAGGAAATCCCCGGTCCCGCGCTCACCTCTGCACCTGGGGCTTC
GCGCAGCTACTAACGCTTTTAATTAAGCTCCCGGCAGACTCTTCCACCAAAGAGAAGATG
ATCTCTGCCTGCAAAACCTTCGGATTCTGGCCGGGATATTTAACTCTTTGCTTGGCGATG
GACAGAAGAGTGGAGGCGCTGACCAATATCGTGTACCTGGATGATATGAATCTGATTGAC
GGGGACCCCAAGTGGTAA
>g524
ATGTATGGCGGCACAGCGCGAAAGAAGAATCGGTCGAACACCGAGAAGAAAGCCGTGGCG
GAGTTGCTGGTTTTCGGCTACGCCTGCAAAATCTTCCGCGACGATGAGAAGGCCGCGTAC
CACGAGCAGGGGAGGCACCTCATCCCGTGGATGGGAGATTCCCAAATCATGATCGATAGG
TATGATGGACGTGGTCATCTGCATGACCTGTCTGAATATGACGCTGAGCACAATTCATGG
AACCGAAATTACAATTTGTCGGAAGAGGAGGCTCGAATAGAGGCTCTATGTGACGAAGAG
AGGTATTTAGCGTTGCATACGGACTTGCTTGAAGAGGAAGCAAGGCAAGAGGAAGAATAT
AAGAGGTTGAGTGAAGCGTTGGCCGAAGATGGAACTTATAACTCAGTGGGCTTTCAGTAT
AAAAGTGATTATTATGATCCTTCACAGCCCACAGAAGAGGAGGAGCCACAGAGGGATAAA
GATGACAGAGAATCAAGTGATACAGAAGATAACGAGGAACCATTTATTGCACCGGATGGA
CTTAATGTTCCTCCAGATGCAGAACTGCCACCAACCGCAAAAATGCATGCTATTATAGAG
CGTACAGCAAATTTTGTCAGCAAGCAGGGTGCTCAGTTTGAGATCATGCTAAAAGCTAAA
CAGGCGCGGAACTCTCAGTTTGACTTTCTGCGATTTGATCATTACCTCAACCCTTACTAC
AAGCACATATTGAAGGCAATGAAGGAGGGACGCTACACCTTGCTGTCAGAGAAACAAAAT
GAGAAGAAAAAGTCATTGTTTAATGCTGCGGATTATGAAGAAGACGACGACGATGATGAG
GATGACGAAGGAAGTGATTACCTACACCCAAGTCTTTTTGCTTCCAAAAGGTGTAGCAGG
CTTGAGGAGCTAACAAAGCCCTTAAAAGTAATGGATCCAGATCACCCTCTGGCAGCGCTT
GTTCTGAAAGCCCGGAGTGAGAACATGGCCACTGATGCTTCAAGCAGCGTCCCCACTCAA
CCTGCTGAAACGGAGAGCACTACAGACTCGACAAATACCTTTTACAATTACTACATGCTG
CCAGATGGGACATATTGCCTTGCACCGCCACCTCCAGGAGTGGAAGTTAGCAGTAGCTAT
GGGACATCACAAGCAACAGCTGTAGCACCAGAGTCCGGCACATCTCCACCTTCATCTTTA
ATTAATAGCGATGCTAACACTAAAGCAATACCAGGCACTTCATTAAGCACAGTCGCACCA
ATGGTTGCCATCATCCCTCCACCTCCGGATATCCAGCCCGTTATTGACAAGTTAGCCGAG
TACGTTGCTCGCAACGGAGTTAAGTTTGAGACCAGCGTCCGCTCAAAGAATGATTCAAGG
TTCGAGTTTCTGCAGCCATGGCATCAGTATAATCCATATTATGAATTTAAGAAACACTTT
TTCATGCAAAAAGAAGGAATCCTCAATTTACCGCCTGCTGCAACATCACAAACTGGTAAT
TCTGCAGATGCCACAAGTGAATCTCTATTGCTTGCTGATACTGATACAACACAAATAGGA
AACTCGGATGCAAAAGGTGATACGTCCGGGAATAAAGCACTCAATGATGGTAAAATGAAA
GCCTCCTTTGCGCCAATAAGTTTTGCAATCAAGGTGAAAGAAACAGACCTTCTACCCTTG
GAGAAAAACCGAGTTAAATTAGATGACGATAGTGAGGAGGAAGAGGAGGGGGCTTGCAAG
GAAGGACCGCAAAACAAGTCCAGCGGCTCTTCTAACAACCAGTCCCTCCACACAGCTGCT
ACCGTAACTGAAGATAGAAAACCTCAATTAACTCCAGAGGAGCTTGAAGCCAAACAAGCA
AAGCAGAAGCTAGAAGATAGACTAGCTGCGGCAGCCAGGGAGAAGCTGGCACAAGCCGCC
AAAGAATCAAAAGAAAAGCAACTGCAGGCAGAACGCAAAAGGAAAGCGGCACTCTTCCTG
CAGACATTGAAGAACCCATTGGACATAGAACTAGGAAGAACAGAGGAGAATGCCCTCAGC
CCAGAGGTTGTGAGCAGTACGGAATGTGACCTACCTGAAGACACCATCATCCCAATGACA
GAGTATCCTGTCGTTCAAAGGTCCCCAATCAGACACTACCCAAGAGAAGAAAGAGAGAAA
AAGAAGAAGAAACGTAAAAAGCGATCCAGGTCAAGGTCACGTTCGCCTAAATATGATTCC
AAGTCAAAGTCGCGATCCCATTCGAAGGTGAAGCATTCTCTTCCTACTGCTTATAGAACA
GTCAGGCGTTCCAGGTCAAGGTCACCCAAAAAGCCATCTCATGCTTCTGAGAGGAGGAGA
GAAGAAGAGCGAGAATATTCAGGCGGCTACCATGTTGGGTACAGTCCTGGAAACGGCCGG
AAGCGTGCACGGTCACGGTATGTATGCCTGTATGCAAAACTGTTTTACTCTTATTGCTCA
AGTCCCATATGCAGTAAAGGGCAATAG
>g532
ATGGTGGACTACAGTGTGTGGGATCACATAGAGGTGTCTGACGATGAAGACGACACACAT
CCGAACATCGATACTCCCAGTCTGTTCAGATGGCGCCACCAGGCTCGAGTGGAGAGAATG
CAACAGTTTGAGAAAGAGAAGGAAGAGCTTCAGAAGGGGGCAAACGAATGCAAGAAGAAG
CTGGCCGAGTGTCAGAAGAAGCTAAAGGATTTAGAGATCAAAGAGGGTCCCGAGATGCAG
AAGCTTCAGAAAGACCTGGAGAAGCTGAAGAAGGAGGAGAAGGCTTGGCAGAAGAAAGAG
GATGAATTCAGGAGGAAGGAGAAGAACATGCCGTGGAATGTGGACACATTGAGCAAAGAG
GGGTTCAGCAAGAGCGTGTTCAACGTCAAGCCCGAAAACAAGGAAGAAACGGAGGAGCAG
AAGGAACAGAAGCACAAAACGTTCGTGGAAAAAAACGAGAAGCTGCTAAAACACTTCGAT
GCCGTCGCCAGAATACAGAATGTTGTCGCCGGGTCGGATTTACTTCTCGGTAACGGCAGC
TGTCCTTTTCTCTCTCAGACCGCGGATCAGCAGTACATGGATGCGTTTAATGATGAGCTG
GAAGCTTTTAAAGGGAGAGTGAAGGAACGAGCCAAAGTCCGCATAGAGAAAGCGCTGAAG
GAGTATGAGGAGGAGGAGCGGAAGAAGAGACTCGGCCCCGGTGGCTTGGATCCCGTGGAG
GTTTATGAATCCCTCCCAGCTGAACTCCAGAAATGTTTCGATACTAAAGATATACAGATG
CTACAGGACGCCATCAGCAAAATGGACCCTACTGAAGCCCGATACTATATGAAGCAGTGT
ATCGACTCGGGACTCTGGGTTCCGAATTCCAAAGGAGGGGACCCCGCAGAGCCCGGGGAC
GACGAGTCCGAACCCGTGTACGAAGAAGCCAAGAAGGACGCCGCCGAGCAGACGGAGGCA
TCATCATCATCATCATAAGTGCGGAACGCGTCGTTCCCGGTGCGGTTTAATCTATACAGC
GTTAGACTTAAACCTCATAGAAGAGGGTGCCAGACCTCTTGGCCTGGAAGGGGTGCTGCT
AAAACCATTCACTTCCCTTTAGAATTTTGGAACACGTTTTAA
>g534
ATGGCGGAAGATTCTGAATGGGTGCTGGAGAGCGTGCTGGGCTTCCTGAGCGGCCCTGTT
TGGACCGGGCCTGTTACGGATTTCATGGATCACAAGTGCTCAGTTTTTGATGACGATGAA
GAGAACAAATTATCATATACGGAGATACACGCCGAATACAGACAGCTGGTGGAAAAGCTT
CTAGAGAGCTATCTGAATGAAATTGGGATCAGTGAAGAACAGTTTCAAGAAGCGTGTGCT
GCTCCCCTGGCTCATTCTCCAGAACTGCAGACAGTTTTACATCCAGTGCTTGCTGTTGAA
GATTTTAGGATGTTCAAAGCCATGATGGTGCAAAGAAACATCGAACTACAATTACAAGCA
ATTCAAATTATACAAGAAAGAAACGGTGTACTTCCAGACTGTTTGCAGAATGGTACCGAT
ATTGTTTCTGAACTTGAACAACAGGAGATTAAGCTGATAGCCGAAGCGTTAAGGATATCC
AAAGACGAATATGAGAAGGAACAGCAGCGCAAGGTTACCAAGGAAAGATTTGTGTCTCCT
GAACTTGAGGATTACGAAAAAGAAGTCTCCACTGGTGATGATAAAACAAGCACTGCAGCA
AACCACAATAAGGGCCGTAATGCCAGAAAACAGCCCCAGAAACGACACGAACATTTATAC
AACGCACCCACCGTTAAATTAAAAGAAATGAGTAACACCGAAGCAGCAGAGGCATGGCTG
GAACAAGCACGAAAAGAGGCCGGCATACATGGTTGCATGTCTAGTTTATCTCAAATGGAG
AAGGAACAGCTCCGACAACGCGCTGAATATTTGAAGCAAAAAAGAGACCACCTGCTGGCC
AAGAAGTTGGATGTGAAGAATACCACACAGGCCCCAGCTGATTGTAAAGAACAGGCATCA
AGTTCTATAAAGGATATGACAGAAGAAGAAAAGAAAGACTTGCAGAAGAGGAAACATCTG
GCTGAAAAACTTAAAGAAGAAGTGATCAATAAGTGA
>g530
ATGACCGTGGGCACAATCTACGCTCAGAGTCGTCTGAAGAAAAAGGGGATCTTTTGCATA
AGCCCTCCGCGTATCAACGTTTGCGGCAAGGTCAAGATGGTTTGCTTTGATAAGACAGGC
ACCCTGACCGAAGAAGGCCTCGACGTCTGGGGGGTGGTCCCCCTGGAGAACACTCATTTC
ATGCCCATTACACACGAGCCCCGTTGTCTGCCCGACGGACCTTTGCTGTATTCTCTGGCC
TCCTGCCACTCCGTCACTCTGCTGAAAGAAAGTCTCATTGGAGATCTCATGGACCTAAAG
ATGATGGATTCCACAGGCTGGACCCTGACAGATGGAGACACGGAAGATGCAACTGGACTT
TTTGGGACTAAAGTTTTATCTGTGATCAAACCCCCCATACTGGAAGAGCAGCCCTATGGA
CCGAAACACCAGGTCCCGTTGGGCGTCTTACAGAGATTCCCGTTCTCCTCCGCCCTGCAG
AGAATGAGCGTCATCTCCAAACTGCCGGGAGATGCCCCCTGTGATCTCTACATGAAGGGG
GCGCCGGAGATGGTGGCCAGCCTGTGCAGGAATGAGACAGTCCCTCTGGATTTCTCTGCC
ATGTTGCGCCAGTACACTCAGGACGGTTACCGCGTGCTGGCCTTTGCCTATAAAACCCTC
AACTCTGTCAAAAGCTTTGAAGAGGCTCAGGCCATATCACGAGAGTCGGCAGAACGTGAT
CTCGTCTTTTTGGGATTTCTGGTCATGAAGAACGTTCTGAAACCCGAGACGTCGCCGGTC
ATCTACGAACTGCGAAAGGCCAACATCCGGACTGTCATGGTGACAGGAGATAACATGCTG
ACCGCTGTAAATGTCGCAAAGAGCTGCCACATGGTGGAGCCCACGGAGAAAGTGTTCTTT
GTGACCGCGTCCCCTCCTTGCTACAATAACGCGGCCACCTTGAAATTCATCCCGGCTGAG
CCATCACCCGTGGAGGATTCGCGAGAGGGTCTGTACCAGTTTGGAGGAACCTTCCTCAGT
AAAGACCCCTATTGCTTTGCGATGAACGGCAAATCGTTTGCTGCGTTGATGGATTACTTT
CCGGATTTAGTCCCCCAAATCCTTGTCCGCGCCGCCATATTTGCCCGAATGTCTCCAGAT
CAAAAAACGCAGCTTGTGCGCAGCTTCCAGGAGCTGAATTACTGCGTCGCAATGTGTGGG
GACGGAGCAAACGACTGCGGAGCCCTGAAAGCCGCCGACGCTGGGATCTCGCTGTCTGAC
GCCGAAGCGTCTGTCGCATCTCCTTTCACCTCCAAGCTCAGTAACATCGAGTGTGTCCCC
GCTGTTATCCGGGAAGGACGCTGTTCCCTGGAGACCTCTTTCGGGTTGTTCAAATACATG
GCGCTGTATAGCCTCACCCAGTTTATCACCGTGCTGATCCTATACACGGTAAACACCAAT
CTCGGGGACTTCCAGTTCCTCTTCATAGACCTGGTGATCACTACGTCTGTGGCCGTCCTA
ATGGGGAAGACCGGTCCGGCCGAAGAACTGGGCATTATAAGTCCTATGGGGACCCTGATT
AGCATCCCGGTGCTGGGGAGTCTGATCCTGCAGGTCCTGCTCATCCTCGTTATCCAGCTT
CTGTCCGTTTTCTTTGTGCAGTCGCAGAGCTGGTTTGTCTCCGTGAATTCCACCGATACG
GCTCGCCTCCACCTGCCAAACTATGAGGACACCACGCTGTTCTCTGTGTCCGCCTTCCAG
TATCTGATCCTGGCTGTCGTCCTGTCCAAGGGTTACCCCTTCCGAAAACCTCTGTACACC
AACGTCCTCTTCCTGCTGCTGCTGATCTCGCTGCTTGGGCTGGTGCTCTGGATCACCATC
TACCCCCTCGGTTTCATGAGGTATTTGCTGCAGCTGAAAGACGTAAACGACTTTAACTTC
AAGTTCGTGCTCATCGGACTGGCGGCTGTGAATTTTGTAGCCGCCTTCATAGCAGAGACT
GCCTTAGACCACGGATATCTCAACTGCCTGCGGCGTCTACGCAAGAAAAAAGAATCCAAG
AAAGCCTATAAAAGACTGGAGACGCAGCTTCGCGGCCCGGGCTCGTGGCCCCCCGTGAAT
CAGACTCTGCACCCCGGCTCCGTGCAGCCCTTCCTGGTCAGGCGGTCCGAGGCAGCGGCT
GGGGCAGTTAGTGCAGCAGGACGCGGCATGTGCCCGACCGTTTTGCCGCTAGCGATTTTC
TTTAAGCTTTTCAAGAATTTGGAGCCTGGAGACTTCCGCGACCACGATGATGTAAAG
>g531
ATGGAAAGCTGCAGCTTCACGGGGGTCGGCCTCCGCGTCTATCTGTACTGGAGCAACAAC
AAGGAGCACTATGTGAGCTTCACGCAGCAGGAGAGCACGGCGGAGGAGATCTGTATACAC
ATCGCACAGAGACTTGGAATTACCCCGCTGTGCTACACGCTATTTGCACTCTATGACGTT
CAAGAAAAATATTGGTATCCACCCAACCATGTTTTTAAGATCTCAAAAGACATGAAGGTT
CTCCTCCATTTTCGCATGAGGTATTATTTCAGGAATTGGCACGGCATGAATGAGAAAGAA
CCCCTCGTTTGCCGAAATATCCCAAAGAGCAGCGAGGAGAAGAGCCAGACTGAGCAAGCA
GAAGCCATCCTGGACTTGGCATCGTTTGAATATCTCTTCGAACAGGGCAAGTATGACTTT
GTGAATGACGTGGTGTCGCTGAAAGATTTCTGGACAGAGCAGGATATCCACAGATTTAAG
AACGAGAGCCTGGGCATGGCGGTGCTGCACCTGTCTCATATCGCCATTAAGAAGAAAGTG
TCCTTAGAAGAGGTGGCAAAACAGGTCAGCTTCAAGGAGTGTATCCCGAAGTCGTTCTGC
CGGCAGATCCAGCAGAACAATTATCTCACCAAATTCCGCATGAGGAACGTCTTCAAGAAG
TTTGTCCGCCACTTCCACCTCCACACCGTGGGCCCGGGGAAGCTGAGCGAAGAAGACGTT
ATGTACAAATACCTGTCCACCCTGGAAAACCTGGCCCCGCGCTTCGGCTCGGAGGTGTTC
AGGGCATTGTCCCTGGAGCTGCCGACAGACGGGGAGAAGCTCCCTCTCTATATCAATGGG
GGCTACATGGACCACTCGGAGACGGTGAACCAAGAGCCCACCACCACTCACGTGGTCATG
GTGAGCGGAATGGACGGAATCAAGTGGAGGGAATGCAAGCAGGAGGAAGCTGTTGAGAAC
CCAACCCCAAAAAATTACTTCAGCAAAAAAAGCCGGGCCAAAGGGCAGAAAACAGCCAAA
ACCCAACAGGGGGCCGAAAGGAGCAACCCCAAGTGGCTTCAGTTCTGTGACTTCCAGGAT
ATCACCCACATCGTGATCAGCAGGAGCAGAGTCAGCGTTAACTGCCAGGACAACCGGTGT
CTTGAGATAGTTTTACCCTCGTACGAAGAAGCTCTGTCCTTCGTCTCGCTGGTGGACGGG
TATTTTCGACTGACGACGGATTCAAACCACTATCTGTGTCATGAAGTGGCCCCTCCTCGG
CTGGTGATGAGTGTTACCAACGGGATTCATGGCCCTCTTCAGGAGCAGTACGTGGTTCAG
AAGCTGAGGCAGGAGGGTCAGGAGGACGGACTCTACGTTATCCGCTGGAGCGCTTTCAAC
TTCAACAAAATGATCATGACTGTGAAGAGAGCCAACCAGAAAAAGGATCTGGGCTCCAAG
CAGTTCCGAATCGAGAAGAAGGGCGACTCGTACGTCCTCGAAGGGTGGGACCGAGGGTTT
CCGAGCGTCAAGGAGCTGACGGACAATCTGCGGGGATGCACCCTGAAATCCGGAGACGAA
ACCTTCTCCGTCAAGAAGTGCATTCTGCCCAAATCTGCAGAAATCTCCAACCTGACGATT
TGCCGGAGAGGGAAGAACCGCGGAGAGAGCGGGGTGTCCAGGAAGAACCTCAATCTGAGC
CAACTCAGCTTCCACCAGATCCGCAAGCATGAAATCTTACAGAAAGCCCACCTGGGCCAG
GGTACCCGGACCAATATTTACGAAGGGGTACTGCTGGTGAGCAAGGGCAGCGAGATTGAG
GGCTACGAGTCCAGCGAGTTAAACAACAACTCCAGCGATTTGAGAGTGGTCCTAAAAGTA
CTGGATCCAAGTCATCGAGACATCGCGCTGGCTTTCTTCGAGACGGCGAGTTTGATGAGC
CAGGTCTCCCACATTCACCTGGTGTTTGTCCACGGAGTGTGCGTACGGGAATCTGAGAAT
ATCATGGTGGAGGAGTTTGTTGAACATGGCCCTCTAGACGTCTGTCTACGTAAAGACAAG
CTACAGATCACAGCCGGCTGGAAGTTCACCGTGGCTCGGCAGCTGGCCAGTGCCTTGACT
TATCTGGAAGATAAAAACTTGGTTCATGGAAATGTCTGCGCAAAGAATATTCTACTGGCC
AGGAAAGGTCTAGAAGAGAACTCGACTCCATTCATCAAGCTGAGTGATCCTGGAGTGACC
TTCACAGTGCTCTCCCGAGAGGAGCGGGTGGAGAGGATCCCGTGGATCGCCCCAGAATGC
GTTCAGAACGTCGGCCGTCTCAGCACCGCTGCCGACAAGTGGAGCTTTGGGACCACGTTG
CTGGAAATCTGTTTTAACGGAGAAGTCCCCTTAAAGGAGCGGACTCCGTCTGAGGTTTGT
GCTGAATGA
>g535
ATGTCGGACACCAGGCGGCGTGTGAAGGTCTACACCCTGAATGAGGACCGCCAGTGGGAC
GACAGGGGCACCGGGCATGTGTCCTCCACCTACGTGGAGCGGCTGAAGGGAATGTCTCTG
CTGGTGCGGGCCGAATCCGACGGTTCACTGCTTTTAGAGTCCAAGATTAATCCAAATACT
GCATATCAGAAGCAGCAGGATACTTTAATCGTTTGGTCTGAAGCAGAAAATTATGACTTA
GCCCTGAGCTTTCAGGAGAAGGCTGGTTGCGATGAGATCTGGGAAAAGATTTGCCAGGTG
CAAGGAAAGGACCCATCTGTAGAAGTCACACAAGATCCAATGGATGAATCTGAAGAGGAA
CGTTTTGAGGAGATGACGGAGACTAGTAACTTGATCGATCTGCCTAATTGCGAACTCGAC
AAACTTGAAGAGATTGCTGACCTCGTTACCTCGGTCCTCTCTTCGCCTATTCGCAGGGAG
AAGCTAGCTTTAGCTTTGGAAAATGAGGGCTACGTCAAAAAACTATTGCAGCTCTTCCAA
GCCTGCGAGAACTTGGATAATGCAGAAGGTTTACATCATCTGTACGAGATAATAAGAGGA
ATCTTATTTTTGAATAAAGCGCCTCTCTTCGAGGTGATGTTTTCGGATGAGTGCATCATG
GATGTTGTAGGGTGCCTAGAATATGACCCTGCTCTAGCTCAGCCGAAAAGACATCGGGAA
TTCTTAACCAAAACAGCAAAGTTCAAGGAAGTCATTCCCATAACAGACTCTGAACTTAGA
CAAAAGATACACCAAACGTACAGGGTACAGTACATTCAGGATGTCATCTTGCCCACCCCA
TCAGTCTTTGAAGAAAACTTTCTTTCCACACTTACATCTTTCATCTTCTTCAACAAAGTG
GAGATTGTTGGCATGCTGCAGGAAGATGAAAAGTTTTTATCTGAAGTTTTTGCACAGTTA
ACTGATGAAGCTACGGATGGTGACAAAAGACGTGAACTGGTACACTTCTTCAAGGAGTTC
TGTGCGTTCTCCCAGACATTACAGCCTCAAAACCGAGATGCTTTTTTTAAAACATTAGCA
AACCTGGGAATTCTTCCTGCCCTGGAGATTGTAATGGGTATGGATGATTTGCAAGTACGC
GCAGCAGCTACAGACATATTTTCCTATCTGGTAGAGTTTAGTCCATCCATGGTCCGGGAT
TTTATAATGCAAGAAGCCCAGCAGAGTGATGATGACATTCTTCTCATTAATGTTGTAATC
GAGCAAATGATTTGCGACACTGATCCAGAACTTGGAGGATCTGTTCAGCTCATGGGCATC
CTGCGTACACTGCTCGATCCAGAGAACATGTTAGCAACAGCTAATAAAATGGAAAAGAGT
GAGTTCCTGACTTTCTTCTACAGCCATTGTATGCGAATCCTCGCTGCACCGGTCTTGGCG
GGCACTTCAGCGGATAATTATCAAACTGCCCAGCTGCTTGCCTTGATACTGGAGTTACTC
ACATTTTGTGTGGAGCACCATACTTATCACATGAGAAACTTCATAATGACCTCTGAATTA
TTTGCAAAAGCATTAAGCCTGATGAGTTCGAAACATACATTTCTGGCCCTATGTGCTTTG
CGTTTCATGAGGCGCATTATAGGCTTAAAGGATGATGTTTACAACAGCTGCATTATAGAT
GACAACCTATTTGAACCAGTTATTAATGCACTTCTCGGCAATGAGACCAGATACAATCTG
TTAAATTCTGCAATACTTGAACTATTTGAGTTTATTAGAGTGGAAGATATACGGTCTCTA
ACATTTTATATATTTGACAACTTTTATACGGCACTTGAACCAATTGAGTATGTCCAAACC
TTTAAGGGATTGAAAGCCAAGTATGACATAGAGAAGGAGCGTCAAAACCAGAAATTAAAC
AGTTCCAATGTAACACCTATACTGCGTATAAACAGCAGACTCCGTAGGGGTACAAGATCC
TTAGGAGGAGATGAAGAGTTGTGGTTTAAAGAAGTGGAACAACAAATAAGCGAAGCCGCC
GCAACTTCTGCAGAGAAATCGAAAATGGAAGCAGAATTTCTAGATAGCTATCAGAAATTC
ATGGAAAACAAGAAAGCTAAAGAGAGTGAAGATAAGGAGAATCTTCCAAAGAGAACAGCT
GGAGGAGCGTTCAAATTTTCACACACTGCCAGTACAGCTAATGGAACAAATAGTGCAAAT
GGCAAATCTGTGGCCGCTCAGACACCACCAGCAGGTTCTAATGGATCGTCCTCAAACGCC
AACATGTCCACTGCAGTAACATCTTCCAAGGGCAATGTGATTGGCCTAGTTGACTACCCT
GAAGATGAGGACGATGAGGAGGACGAAGACTCTTCTCCCAGAAAAAGACCACGCCTGGGG
TCCTAG
>g540
ATGACTGGCCCGAAGGCTTATCTCATATACTCAAGCAGTGTGGCAGCTGGAGCACAGAGT
GGAATTGAGGAGTGTAAATATCAGTTTGCCTGGGATCGTTGGAATTGCCCTGAAAGGACA
CTGCAGCTCTCAAGTCACAGTGGTCTACGCAGTGACTTGAACCCACAATCCACAGGATCT
TCTACTGCAGGCAGCAGTCTCTATGAAACCGTGCCTACTTCTCCAGTCTGGGGTATAAAT
TTCAACAGGATCCTCTTCTCTAGACTGGAATCCCAATTCAACCGGACCTCCTTATCTCAT
CTCCAGAACCCATTTTCACCAAATCACCCTTTGCAGTCTGGAACCTCACTTCCCACAGGA
TTCATTTCACCAGCAAATCGTGAAGCTGCTTTTGTGCATGCCATCAGCTCAGCAGGAGTC
ATGTATACACTGACAAGGAACTGCAGCCTTGGAGATTTTGATAACTGTGGCTGTGATGAT
ACCAGAAATGGGCAACCTGGTGGTCAAGGATGGTTATGGGGTGGATGCAGCGACAATGTC
GGTTTTGGAGAAGCCATTTCCAAGCAGTTTGTGGATGCTCTTGAGACTGGACAAGATGCC
AGAGCTGCCATGAATCTCCATAATAATGAAGCAGGACGGAAGGCTGTGAAAAGTACCATG
AAACGGACATGCAAATGCCACGGTGTCTCAGGAAGTTGCACCACACAAACCTGCTGGCTC
CAGCTACCAGAGTTTAGAGAGGTGGGCTATTACTTAAAAGAAAAATACCACAAAGCTCTA
AAGGTTGATCTTCTACAAGGAGCTGGTAACAGTGCAGCTAGCAGAGGGGCCATAGCTGAA
ACATTCAGTTCGATTTCCAAAAAAGAGCTGGTTCACCTGGAAGAGTCTCCTGATTACTGT
CTGGAAAACAAAACACTAGGCATTTTGGGTACAGAGGGCAGAGAATGTCTCAAGAGAGGT
AAGATGCTCAGTAAGTGGGAAAAGAGAAGCTGTAAGCGCCTTTGCGGAGACTGTGGGTTG
GTGGTGGAGGAGAGAAGAGCAGACATGGTATCCAGCTGCAACTGTAAATTCCACTGGTGC
TGTGCAGTGAAATGCGAACAGTGCAGAAAAAGTGTGACTAAGTATTTTTGTGTCAAAAAG
GAAAAACGGGAGAGGAGCGGAGGCGGTATAATACGCAAGAAAGAAATAAAGCTAAAGAAC
ATGTGA
>g541
ATGAACAGCTGGTACAATTACAGTTTATTGATTTGTCAAGACGACTGGAATATAACAGAT
TTTCTCACACTGGCTCAAAATAACTCTAGATTTCACCTTGGATTAATTATAAACATAACC
GTAAATCTGACTTTAAGCAATTACATGATGAGTTACTTGCAATTAAACTTGGAGAGCATA
AAAGACACCACATCCACCATTGTTATGTTTGGTTGTGACATGGAAGACACAAGACAAATT
TTTGAAATGGCTACCCATTATGGAATTGTATTACCAGAATTTCATTGGGTTTTTGGAGAC
TCGCAAAGCGTTGATGAATTAAGAACTGAAGGATTGCCACTGGGACTTATAGCTCATGGT
AAAACAAGAGAGTCCTTCTTTGAGCACTATGTACAGGATGCTATGGAGCTAATAGCAAGA
GCCGTCGCCACGGCTTCTATGGACCAGCCAGAACTAGCACTTATCCCCAGTACGACAAAC
TGTATGAACAGAGACACCATGAACCTCACTTCTGGGCAGTATTTATCAAGGTTTTTATCT
AGCACATCATTTAGTGGTCTGAGCGGACACATCAAGGTTAAAGATTCTGCAGTTATCAAC
TCAGAAAATCATTACTTTATTTGGAATTTACAACACGATCCTCTTGGAAATCCAATGTGG
ACACGTCTTGGGAGCTGGCAAGGGGGAAAAATTATTATGGATTATGGACTGTGGCCAGAT
CAGACACAGAGACACAAAAATCAGTATCAACAACCTACACGATTACACCTCAGGGTTGTG
ACTCTTATTGAACCTCCTTTTGTGTTTACAAGAAATGTTGATGATGATGGCCAGTGTCCA
GCAGGACAGTTGTGCTTAGATCCCATGACAAATGACTCGGGTGTTCTAGATAACCTCTTT
GAAAGCTTGCAAGGAGATAACGACACAGTGCCAATTGAATTAAAAAAGTGCTGCTATGGC
TACTGTATCGACCTTTTGGAGAAACTAGCAGAAGATATGAACTTTGACTTTGACCTATAC
ATTGTTGGTGATGGAAAATACGGGGCGTGGAAAAATGGTCACTGGACAGGACTAGTAGGT
GACCTCTTAAGTGGTGCTGCCCATATGGCTGTCACATCATTCAGTATCAATACAGCAAGA
AGTCAGGTTATTGATTTCACCAGCCCATTCTTTTCAACCAGTCTGGGTATTTTAGTAAGG
ACCAAAGATACTGCCGCTCCAATTGGAGCTTTTATGTGGCCACTTCATTGGACAATGTGG
CTTGGGATATTTGTATCGCTTCACATTACGGCAATATTCCTAACACTTTATGAATGGAAA
AGTCCCTTTGGGATGACACCCAAGGGCAGGAACAGAAGCAAAGTGTTCTCCTTCTCCTCT
GCTCTAAATGTATGCTATGCCATATTATTTGGCAGGACAGCAGCCATCAAAACACCCAAA
TGTTGGACTGGAAGGTTTCTAATGAATCTTTGGGCTATCTTTTGTCTGTTTTGTTTATCA
ACATACACAGCTAACCTTGCAGCCGTCATGGTAGGAGAAAAGATTTACGAGGAGCTTTCT
GGAATACATGATCCTAAG
>g547
ATGATTTCAGCATCGGGGAATGAATCTGACAGAGAAGAGAATCAAGAGGATGTGGACTTT
CAGGACAGATGGGAGGAACAGCAGATAAAGAAAGCAATCAAGTTTTCACAAGTTGTAGAT
GAAGATATGGTGCCTGTGCGACCCCCACAAAGGGTTAGAGCTGCAGAGCCAAGGGTGTCC
TTGCCACCAGTAACAGTGGAAGATATCAAAAAGAGACTCGCTGCAAGGCAAGATAAATAT
GACCCACAAAGTGAAGGGACTTTCCCTTATTTTGAAATTGGTCGAGTTCTATACATGATT
GCATCTTTTCAAGAGGTTCACAAGTCTCATACACAAGAGAGTGAAAAATATAAGTATGAT
ATTGAGAGCTCTAAACACTTGCTAGAAAAGCTTGAGAAATCCACAAGTGAGCAAAGCTAC
AAGTTTTTCAAGAAGATGAAATCTTATGTAGATAACTATGTTGACTGTCTCAATGAAAAG
ATCAACCAGATACATGAACTGGAGTCTGAGATGTTTACACTGGTGCATCAGAGAGCCGGA
CTTCAGCTGCAGCGTAGGCAAAAGGACCTCCGTAACGAGTCTGCTGCAATTTTGAAGCTA
TCTGGAGCCGAAGGCAGGAGAGGCGCAAACTCTCTGGAATTAAAGATTCATTGTGAAGGA
ATGTTCAGTGATGATGCAGATGCCTTCCTGGAGAGGAGAATCCTTTCCAACAAAACAGAT
GCCGTGTTCATAAGACACTTATACGCCAGAATATGTCTTCAGAGTAAAGACATATTTGAT
GATGTACATGAAGACTTTCATCGGGTTAAGAACATCTTATCCAAGTTTCACGAATGGAGA
GAGCGATTTCCGGACACATATTATGATGCTTACATTGGTTTATGCATTCCCAAACTACTC
AATCCAATAATCAGATTGCAGCTCCTGGACTGGAACCCGTTAGAGGCCACCACTGTGCTT
GAGGAGATGGAGTGGTACGGTGAAGTTGAAGAGTTCTCTTGTGCCAGTGGAGACCCTGAA
AACAGCGTGGCGGACAATACAGATGTCAACATTTTATCATCCGTGATTGAAAAGTGTGTT
CTTCCAAAGGTTTCAGAGTTTGTGGAGCACATCTGGGATCCAGTTTCATCCACACAGACA
ACAAACTTGGTTTGTTTCTGCAAAACCTATGTATTGGGGGACGAGTCCAAAAAGGCAGTA
GAGGGTTTGGTAGGTTGTCTTATTTCAAGAATAAAGAAGGCTATTGAAGATGATGTATTT
ATTCCATTGTACCCCAAAAGTGCTTTGCAAGATACAAATTCTCCACAGTCAAAATTCCAA
GAAAGGCAGTTTTGGGCAGCCGTGAAGATGCTAAACAACATTATGTTATGGGATGGATTC
CTCCAAGAAGAAGCCTTGCAAGAACTTGGAGTAGACAAACTGCTCAATCGCTACCTCCTC
TTAATACTTTTGAATGCGACTCCTGACTCTAATATGGTCAATAAGTCTAGAAAGGTAACC
TTCCATTCTCAATACCGTAAGGCTGGCACTATGGGGTCTGTTGTGTAA
>g559
ATGGAATCTGCAGGGGAATTGCAGTTATGGGGAGTGGGAGCTCAGGCCCAGCCGGTGGAG
GGATGCATAAGAGTGACTATAACCATCCCCCAGCTAAACACAGGAATGATCTGCCCTATG
GAATTGGAAGCTCTCATATGTCCTGCGGCTAAGAAAGTATGTGCCCCAATAATCTTGGGC
ACCAATGCAAGGATGGTACAGGATGTATTTAGAGCCTACCTTACAGAAGTGGGTGATGTA
TCTCTAGCCCGACTGATGGAGGTCAACCCTGTTCTAGGGAAGGAGTGCCGTCGACTAGCC
CTAGAATCTAAACCAGGGTCTTGCCACTATGCAGGGAGAGACACTGTATTCATTAAGCCT
GGTGAGACCAAGACTCTACAAGCCATAGCCTCCATGCATCGTGAAATGTTGGGAGGAACC
GAACAATACCTTGTTGAATCCTTACCTGAAGAGGATAAAAAGAAGGGGTGGACTCTAATA
CCTGAGGTGAAAGACTGGCGGACCCACTGGTGTCAAAGTTTTCCTGTAATGATACAGAAT
CTAACACCTACAGAGATCAGAATCGATCGTCACCAGGAAATCGGTGTGATTTATTTGTTA
GATCAAGTCTCTTCTGTCATGTCTGTGAAGACAGAACAGGGGGTTGATCTTAAAGCACCT
ATAGCTTTTGACTTGGAAGATTCTCCCCTACCACAGAAGTGGAAAGATAGACTTCGAGCT
AAACTAGCTACTCGAGAGAGAGTCTTCTCCAGGGAAGAAATGGATGTGGGATGTGCAAAG
AGTGCTACACATGCTATCAGACTTTCTGACCCAGCCCCTTTCCGAGAGAGGTCAAGGAGG
ATTCCCCCTCGAGACGTGGAGGATGTCCGAGATATACTCCAACAGATGAAAGGAGCTGGC
ATTATTAAAGAGTCCAGAAGCCCATACGCTTCGCCTATAGTGGTAGTAAGGAAAAAGAAT
GGCACAGTCTGGCTATGCATAGACTACCGCACTCTGAACAAAAGGACTGTGCCGGATCAA
TACACACTACCACGGATAGAGGATCTGCTAAATGCCCTTTCTGGAAGCCGGTGGTTTAGC
GTACTTGACCTGAGGTCTGGGTATTATCAGGTACCCATGAAGAAGGAAGATCAGGAGAAG
ACAGCCTTTATCTGTCCCTTAGGATTCTACCAGTTCACCAGGATGCCTCAAGGGGTCACA
GGAGCTCCTGCCACTTTTCAGAGGTTGATGGAGAAGACTGTGGGGGATATGAATCCCAAA
GAGTGCCTGGTGTACCTAGATGACCTCATTGTGTTCGGGAGGACACCCGAAGAACATGAA
CAGCGACTGCTGAAGGTATTGGACCGACTCCAAGCAGAGGGGCTGAAATTGTCGATAGAC
AAATGTCGGTTTGCTCGGAACTCTGTCACATATGTAGGGCATATTGTCTCTGCAGAGGGA
ATAGCCACTGACCCAGACAAAATTGAAGCGGTATTGAACTGGCCTAGACCGAATAATATC
AGTGACTTGCGGTCATTCCTTGGATTCTGTGGCTACTACCGAAGGTTTGTGAAAGACTAC
TCGAAGATTGCTCGAGAGCTGCATAACCTGTTAAAGACAACTTCCCATATAGAGGGTACT
AAGGCACCACGTCCTAAAGATTTCTTTGGATAG
>g553
ATGATAGTCAGTGGAGTGGAAACTTCCATTGAGCCTGTTTTTTCCTTACTTTGCTCAGCA
TGGAAAAGAAGATGGTTTGTACTTCGCAGCGGACGTTTAACTGGAGATCCCGATGTACTC
GAGTATTACAAAAATGATCACGCTAAGAAACCGATTCGAATTATTGACTTAAACTTGTGC
GAACAGGTTGATGCCGGGTTGGTATTCAACAAAAAAGAATTTGAAAACAGTTATATTTTC
GATATAAAGACCATCGACAGAGTTTTCTATTTAGTGGCCGAAAGTGAAGAGGAGATGAAT
AAGTGGGTTCGAAATATATGTGACATCTGTGGGTTTAATCCTACTGAAGAAGATGTTGGG
AAGTCTCACGGCGTTCCTATGCATGCACCCATTGAAATTCCTATGTCTGGAAGTTCAGAA
CCCTCTAGTCAAGGGTCATCACTCCATGGACTTCTTCCTCCTCCATATCACCTCATCAAT
GTGCCGCCTTTTGAATCTTCTAACAGTCATGAAGATCCACAGGACTACCTGCTGTTAGTC
AACTGCCAAAGCAAAAAACCAGAACCATTCAGGAAAGGGTCCTCATCATTAGCATCAGAA
GAAGAATATCTGCTGCTAGAAGATTTTGAGAGCAAAAAGATATCTTGGCAGTCTCATGCT
GATTCGGCAAAGTCAACAGCATCGGAAACAGACTGCAACGATAATGTCCCTACCCAAAAA
GGAAGCAAGCATTCAGTGAATGGGTACTTCCAGCAGTCCAGTGTTTATGATTCTCCATCC
CGCACAGGTTCATCCTCTACAGAGGCCAGTTTTTACAACCTTCCCCGAAGCTACTCCCAG
GACGTTTTACCAAAAGCTGTATCTCCATCTGGCACAGACGGAGATGGGGAATCAAATGTT
TTTAATATGTCCGGAGCATCTTTATTGGAGGCTCAGTTTAGAAGTTTAACATTAACAAGT
TATGACGTACCGCCGTCTTCGGGAGGTACGTACCAGATTCCCAGGACTGTTCATGAAAGC
TCTGTGGGGCACACTTCAACAAAATTAGAGACTGTTTCAAATGTTCCTCCACCCAGACCG
CCAAAGCCTTATTATTCATCGGAACGGTCCCCGATTGAACATAATTTTACCCGTACGGCC
TCAGAGACCGACAGTAGCTACTGTGTTCCTACGTCTGGAATATCCGCTTCTCGTAGTAAT
ACTGTTTCCTCATTAGAACTAAATAAATACAGGAAAGATATGAGTTCCCAAGATTTTTAT
GATATTCCTCGGCCGTTTATCAGCGACAGATCAAGCTCGCTTGAGGGCTTTCACGGCCAT
TTTAAAAATAAGAGCATGATGGGAGTTGGAAGTTTCTCAAATGAAGAACTAGATGAAAAC
TATGTAGCCATGAACCCAAATTCACCTCCTCGGCAGCATTCCAATAGCTGTACTGAACCC
ATCCAGGAAACCAATTATGTCCCGATGACTCCAGGCACATTTGACTTCTCATCGTTTGGA
ATGCAAGTGCCACCTCCAGCACACATGGGTTTCCGGTCCAGTCCAAAGACACCACCAAGG
AGGTCTGTGCCTTCTACAGACTGCGAACCCCCTCCGGTGGATCGCAACCTTAAACCAGAC
AGGAAAGCAAAGCCAGCACCATTGGAAATCAAGCCTTTACCCGAGTGGGAAGAATTGCAC
ATGCAGACTCCAGTGCGTTCTCCTGTCACTCGAAGCTTTACACGAGAAGAAGAGTCCTTC
TATTGTACTCTCCCCATAACACCTGTTAAGAGGGAGGGATCGGGCTGGGAAAGAATTGAG
GAGGGATTATTTGGGAGCAACAGTCTTGACGGTGGGAACAGTCCCCTAGTAAAGCCTAAA
GGAGACAAGCAGGTGGAGTACTTGGACTTGGATCTAGACTCTGGAAAATTAACACCACCA
AGAAAGAAGAAAATCAGCGATTCTGGGAGCATTGCTGCTGATGAAAAAGTGGATTATGTT
GTAGTGGACAAACAGAAAACTATTGCGCTGCAAAACACTAGAAGAGCATGGACTGATGGG
AGACAGTCTACCGAGTCTGAAACTCCAACCAAGAGCTTAAAATGA
>g550
ATGACCAAGATAACCGAGCAAGATGGACCCTATAAACCAGACTACTATTCTGCTTCCTTT
CAAAGATCTAACAGCCATGACAAGGTTCGAAGGATTGTGGCGGAGGAAGGGCGCACTGCC
AGAAACCTGATCGCATGGAGTGTCCCCTTGGAAAACAAGGAAGATGATGGTAAACCAAAA
TGGCCATGTGGGAAACCCAAGAGAGGCATACATGGAGTGCACAAACCTTCAAAGCAGATC
AACTTGCACTGTAAACTAAACTCTGGCCCCTCTACTGATAAAAATCAGGACAAAAGCCCA
ACAAAAGCCAGGCACCCCAGAAAAGTGGATCTCCGGGCTCGCTACTGGGCTTTTCTCTTT
GATAACTTAAGAAGAGCTGTGGATGAGATTTATGTGACCTGTGAATCGGACCAAAGTGTT
GTTGAATGCAAGGAAGTTTTGATGATGCTCGATAACTATGTGAGAGATTTCAAAGCTCTT
ATTGACTGGATTCAACTTCAGGAAAAGCTGGAGAAAACAGATGCCCAAAGCAGGGGACCT
ACGCTTACCATAACTCCCAGTCGCCTGACTTCATCGGGAGTAAGTTGGGCGGATAAAGTG
AAGGCTAATCACAGCAGCACTGCCGGCAGCCAGGTTACAGAGACCATGCGCTCCAGTGCA
CCGAGCCCCTCGCACAGGATGCCACATGAAACGGAGCGGACAGATGCCGAAGGCTGGGAG
ACTGTACAACGTGGCAGGCCGGTGCGCTCCAAATCTACAACAGCCACAAACAAACCCTGT
CCTACAGTAGCGGCAGAACAACGAGCAAAAGATGACAGCAACAAGGAGAATGTCTTTTCG
AAGCCAAGCGAAGTGTTGCCACACGAGATCTATAAATCCGAGCTTGCCCCGGTTCTTGTG
GAACCTCCTCAGAAGGAGTTGCTTTGCCCGTGTGAAATTCCTCTGACGGAAATAACCCAG
TTCACTGTCCACAAAGCTTTAGAAGAAATAAAGACCACAGGAACATTTTCCCCCCAACCA
GCTCCTTCCTTACCATGTCTTGATATACCCGTTGTTTTCCTTGACCCCCTTTCGAAACTG
CGGAAGACAGAGGTGACTCGTGCTATGGATATCGTCTCATCGGGGGAAGGGAAGCGAGGC
AGCGATATGGACCTATCAAACGTGAGTTCTGGAAAACTGTCTATGGCAGAAGTTCTTGCT
AAGAAAGAAGAGCTGGCTGATCGTCTAGAAAAGGCGAATGAGGAGGCCATAGCGAGTGCT
ATTGCTGAGGAAGAACAGCTAACAAGAGAAATCGAAGCGGAGGAGAATGAAATTGAGATT
GACAATGAAAGTGATTTTTCTGCTAGCATGGGAAGTGGAAGCATGTCATTCAATGGCAAT
TCCTTGGATTGGAATGAAGTTTTAGCAGATTATGAAGCTCGAGAATCGTGGAGGCAGAAC
ACATCCTGGGGAGACATTGTGGAGGAAGAACCTTCAAGGCCTCCTGGACACGGAATCCAC
ATGCATGAAAAGCTTTCTTCACCATCAAGAAAAAGAACAATTGCTGAATCGAAAAAGAAG
CATGAGGAGAAGCAACTTAAAGCACAACAGCTGCGGGAGAAGCTACGGGAAGAAAAAGCA
TTTAAGGTTCAAAAACTACTGGAAAGGGAGAAGGAAGTGCGAAAGTGGAAAGAGGAATTA
CTGGAGCAGAGGCGTAAAATGATGGACGAAAAGTTGCTCCATGCTGAATTTAAGCGGGAG
GTACAATTACAAGCAATTGTGAAGAAGGCGCAGGAAGAGGAAGCAAAGGTAAATGAGATT
GCTTTTATCAATACATTGGAAGCCCAAAACAAGAGACATGATGTCTTAGCCAAATTAAAG
GAATATGAGCAAAGACTTAACGAGCTTCAAGAAGAACGGCAGCGAAGGCAGGAGGAGAAG
CAGGCTCGTGACGAAGCTGTACAGGAACGCAAGCGAGTTCTGGAAGCCGAGCGTCAGGCC
CGTGTTGAGGAACTATTAATGAAGAGGAAGGAGCAAGAGGCCCGTATAGAGATGCAGCGG
CTTGAAAAGGAGCGTGCGAGGGAGGATGCAGCCAGAGAGAGAGCCAGGGACAGAGAAGAA
AGGTTGGCAGCTTTAACCGCAGCACAGCAGGAGGCTATGGAGGAGCTCCAGAAGAAGATT
CAACTCAAGCATGATGAGAGCGTTAGGAGACACTTGGAACAGATTGAGCAGAGGAAGGAG
AAGGCTGCAGAACTCAGCAGTGGCAGGCATGCCAGCACCGACTATGCTCCCAAACTCACC
CCGTATGAGCGGAAGAAACAGTGCTCTCTATGCAATGTGACGATTTCCTCTGATGTTTAC
CTTTTTAGCCACATTAAAGGCAGAAAGCACCAACTGGCCGTGCGAGAGAACAGCAGCATA
CAGGGCAGGGAACTCTCTGATGAAGAAGTGGAACACCTTTCTTTAAAAAAATATATAGTG
GATATACTGGTAGAAACAGCTGCCCCAGCCGAGCCTGTGAAAGATGGGGAAGAGAAGCAA
AAAAATAAGAAGAAGGCCAAGAAGTTAAAAACTCGTTTGAACACCAGAGCAAAGGAGTAT
GAAAATACAATGGAGGCCAAAACCCCTGTGACTGATTCTCCATACAAAGCCAAGTTGCAG
AGACTTACCAAGGATATTCAGAAGCAGCTACAAACGCAGGACAGTGGTGCCTGGCCCACC
AATAAAGTATCAGCCCTGGACAGAGCCTTGGGGGAGATTTCCAGGATCCTGGAGAAGCAG
GTTAACGCACCTTCCTGGCATAAGACATGTGCTGCTCCTGCTCTGTCCACCAAGAGCACG
GTTTCTGATATCTCTAATCTTCTCCTCTGTCCAAGTAACGCGGCTGATCAGATAGCATTC
CGGGCAGCAGGTGGACTTTCTGTCCTAGAACAGATTTTACAGACAGCAACCCCAGTATGC
AACTCCAGTCCGGCCACCCGTCTGCCATTCAAAAGCCAGGCTGGGGTTGAGTCTCAGGCT
GGAATTCCAAACTTACCAGAGACCTGTCCTGTGCTGGAGCATCGGCCATAG
>g568
GCATCACATATGATAATATCACTGGTGGAAACCCATCCTGACTATTTTATCATTAACCTT
GATAAGCTTGATTACTGCGCCAGTTTGAAAAATCTTGAGCCTATTTCGAATAGACCAAAT
TACAAGTTTTTGCAGGGTGATATCTGTGACTCGGATTTCATAAAACACCTGTTTGAGACA
GAAAATATTGATATTGTGTTTCATTTTGCTGCACAAACCCATGTAGATCTTTCGTTTCGG
CATTCCTTAAAATTTGCGTATGTGAACACGTATGGCACATGTATTCTTCTAAATGCTGCT
TATGGCGTAGGAGTAGAAAAGTTTGTTTATATAAGTACAGATGAAGTGTATGGTGGAAGT
CTTGATAAGGAATTTGATGAAACTTCACCAAAACGGCCAACAAATCCATATGCATCGTCC
AAGGCAGCTGCAGAAAGCTTTGTGCTGTCTTTCTGGGAAAGATACAAGTTTCCAGTTGTG
ATTACCAGATGCAGTAATGTTTATGGGCCACATCAGTATCCCGAAAAG
>g576
GTGAAATGGATGATGTACTGGATCATATTTGCACTTTTCATGTCGGTAGAAACGTTTACA
GACATTTTCCTGTGTTGGTTCCCTTTTTATTATGAACTGAAAATAGCTTTTGTGGCCTGG
TTGCTGTCTCCGTACACAAAAGGCTCCAGCCTTCTATACCGGAAATTTGTTCACCCAACA
CTGTCCTCGAAAGAAAAGGACATCGATGAGTGTCTTATCCAAGCTAAAGATCGTAGCTAT
GATGCCTTGGTTCACTTCGGAAAGAGAGGCCTGAATGTAGCAGCCACCGCCGCAGTCACC
GCCGCTGCCAAGCACAGCTGGGGTCTTCTTGTTGTTGTTGATGACCACGTCATCACTTTC
CTGCGGCTGAGCGCCGGTACCTCTGAGTATGATGTCTGGCCAAATGCTCCGGGGACAGCG
TCCGAGCGGCTTCACACTTTTTATTACATGAACCATGGGCAGGGCCAAGGAGCTCTCTCA
GAAAGACTCAGGAGTTTCAGCATGCAGGATCTCTCAACCATCCGTGGTGATTCCCCTTCT
CCTGTGACAGTGCGGGCGGCAGGCAAAACAACCAAGTCCAAGCTCACCCGAAGTGCAACG
CAGGTCTCCGAGGCCTCAGGTTTGTGA
>g579
ATGTCTATGCTCCCTTCCTTTGGCTTCACCCAGGAGCAAGTAGCTTGTGTGTGTGAGGTT
CTGCAGCAAGGGGGCAACTTGGAAAGATTGGGAAGGTTCCTCTGGTCCCTTCCAGCCTGC
GACCATCTGCACAAGAATGAAAGTGTCCTGAAGGCCAAGGCAGTGGTGGCTTTCCACAGG
GGCAACTTCAGGGAGCTCTACAAGATCCTGGAAAGTCATCAGTTCTCACCCCATAACCAC
CCCAAACTTCAGCAGCTGTGGCTCAAAGCTCATTATGTGGAGGCAGAAAAGCTTAGGGGG
AGACCTCTTGGGGCAGTTGGGAAATACAGGGTGAGACGAAAATTCCCCTTGCCCAGGACG
ATCTGGGACGGTGAAGAGACGAGTTACTGTTTTAAGGAGAAGTCCAGGGGGGTGCTGAGA
GAGTGGTATGCCCACAACCCCTACCCATCACCCAGGGAGAAGAGGGAACTGGCTGAGGCC
ACTGGACTTACCACCACCCAGGTCAGCAACTGGTTCAAGAACAGGAGGCAAAGGGACCGA
GCTGCAGAAGCCAAAGAAAGATACATTGTGTTCATCCAAATACTGAGCCCCAGAGAAGCT
CTCACCCCCCCAGCCCCAGACAAAGGAGCACAAATGCCCCCCAATTCCACTTACAATTCC
ACGTGGTATTCCACTAACATCCAAAGCCAGTAA
>g578
TCCCTCTTCAAGATTTGGGTGAATGAAGAAACACAGCTTGTATATTTCCACGGGACACGG
GACACTCCCTTGGAGCATCACCTGTATGTCACAAGTTACAAAAACCCCGGTGAGGTGGTG
AGGCTGACTGAACTGGGCTACACACACAGCTGCACCTTAAGCCAGAAATTTGATATGTTT
GTAAGCCAGTACAGCAGTGTGTCATCCCCACCATGCGTGCACCTTTTCCGTCTTGAAGGG
GACCCTATTCATCAGCAACCGCAGTTCTGGGCAAGCTTGATGGAAGCCTCAAGCAGTCCT
CCATATTATGTTCCACCAGAGATCTTCCACTTTGAGACAAGCAGTAAAGTAAAGCTCTAT
GGAATGGTTTATAAGCCTCACAATCTAAGCCTAGGGAAAAAGCATCCAACTGTGGTTTTT
GTCTATGGTGGACCACAGGTGCAGCTAGTAAATAACTCATTTAAAGGAATCAAGTATTTG
CGTTTGAATACTCTGGCACACCTTGGATATGCAGTAATTGTGATAGATGGTCGTGGGTCT
TGCCACAGAGGACTCTCTTTCGAGGGCGAGCTCAAGAACAAAATGGGCCTGGTTGAAATC
GAAGACCAGGTAGAGGGATTACATTTTGTAGCTGAGAAGTTTGGATTCGTTGACCTGAAT
CGTGTGGCTATTCATGGGTGGTCATATGGTGGCTTTTTGTCTCTCATGGGACTAATCCAG
AGACCAGACATATTCAAGGTGGCCATTGCCGGTGCTCCAGTAACTGTTTGGATGGCGTAC
GACACCGGATACACAGAGCGCTACATGGACACACCAGAGAACAATCAGGCTGGTTATGAA
GCAGGATCTGCAGCTTTACATGTGGACAAACTACCCAATGAGCCTCATCGTCTCCTAATC
CTTCACGGTTTTCTGGATGAGAATGTGCACTTTTTTCACACCAGCTTCCTTGTATCTCAG
CTGATTCGAGCAGGAAAACCCTACCAGTTGCAGATTTACCCAAATGAAAGGCATAGCATT
CGCTGCCCTGAGTCTGGAGAACATTATGAGATCACCTTACTACATTTCTTGCAAGAACAT
TTGTGA
>g585
ATGCCTTGGTTCAAGGGGTGGAAGGTGGAGAGGAAGGAAGGAAACGCCAGCGGAGTCTCC
CTTCTGGAAGCTCTGGACACCATACTCCCTCCAACTCGTCCAACAGATAAACCTCTGCGC
CTCCCCCTTCAGGACGTCTACAAAATTGGAGGCATCGGCACTGTCCCAGTAGGCCGCGTC
GAGACCGGTATTCTGAAACCAGGGATGGTGGTGACCTTCGCTCCAGTGAACATCACAACC
GAGGTGAAGTCTGTGGAGATGCACCACGAGGCCCTGAGCGAAGCCCTTCCCGGAGACAAC
GTAGGGTTCAACGTAAAGAACGTGTCTGTCAAAGACATCCGCAGAGGCAACGTCTGTGGG
GACAGCAAAGCTGACCCACCCCAGGAAGCAGCTCACTTCACCTCCCAGGTGATCATCTTA
AACCACCCTGGCCAGATCAGCGCTGGGTACTCTCCAGTTATTGATTGCCACACCGCACAC
ATCGCCTGCAAGTTCGCAGAGCTAAAAGAAAAGATTGATCGGCGTTCCGGGAAAAAGCTG
GAGGACAATCCCAAGGCTCTGAAATCTGGAGACGCGGCCATTGTGGAGATGATTCCTGGA
AAGCCCATGTGTGTAGAAAGCTTCTCTCAGTACCCACCTCTTGGGCGCTTTGCCGTGCGG
GACATGAGGCAGACGGTGGCCGTTGGCGTCATCAAGAACGTAGAGAAGAAGGTCGGAGGA
GCCGGCAAGGTCACCAAGTCTGCACAAAAAGCTCAGAAAGCTGCGAAAGCTCCAGGGGCT
GGAAGCCAATGGGACCAATTAGAGATCCAGAAAACAGAGAAGAAAAACCAGGTGGACATA
AATAGAGAGGAAGAGGGGATCCAAAGAGACCGCCGTGCCCACCTCGGGGGGAACGTATAC
ACAAAACCTGAAGAGAAGGGCTCAGCGCACGTAGCTACTGATCAGGTTTATTGA
>g583
GGTACATCAGGACTCGGGTTTAGCATTGCAGGCGGTACAGACAACCCGCACATTGGCGAT
GACACAAGCATATTCATCACAAAAATCATTTCTGGAGGAGCTGCTGCTCAAGATGGAAGA
TTACGGGTTAATGACTGTATATTACGGGTGAACGATGTGGACGTACACGATGTAACGCAC
AGTAAGGCTGTCGAAGCATTAAAAGAGGCCGGATCCATTGTCCGACTATATGTCAGAAGG
AGAAAGCCAATCACAGAGAAAATCATGGAGCTTAAGCTTGTAAAAGGCCCTAAAGGTCTT
GGATTTAGCATAGCTGGTGGTGTAGGAAATCAGCACATTCCAGGAGACAACAGTATTTAT
GTAACTAAAATCATTGAAGGCGGCGCAGCTCACAAAGATGGAAAACTTCAAATCGGGGAC
AAGCTTCTAGCGGTGAACTCTGTGTGTTTGGAAGATGTTAGTCATGAAGAAGCTGTGACC
GCTTTAAAAAATACGTCAGACTTTGTTTATCTGAAAGTAGCCAAGCCTACCACCATGTTC
ATGAATGACAGCTATGCACCTCCAGATATCACAAACTCATATTCTCAGCAAGTGGATAAC
CATATCAATAGTCCTGGATATCTAGGGCACCAGTTACCTCCCTCTCCTGGTAGATATTCC
CCTGTCCCTAAAGCAATGCTCGGAGAAGACGATTTAGCACGGGAACCAAGAAAGATTGTA
TTGCACAGAGGAACAACCGGGTTAGGCTTTAACATTGTTGGAGGTGAAGACGGCGAAGGA
ATTTTCATTTCATTCATCCTCGCCGGAGGTCCAGCTGATTTGAGTGGAGAGCTACAAAAA
GGGGACCGCATTATATCAGTAAATGGTGTTGACCTACGAGGTGCCACTCATGAGCAGGCA
GCAACTGCATTAAAGAACGCCGGCCAGTCAGTTACTATTATCGCACAATACCGTCCAGAA
GAATATAGTCGTTTTGAAGCAAAAATCCATGATTTAAGGGAACAGATGATGAATAGCAGC
ATCAGCTCAGGATCTGGCTCCCTTCGGACAAGCCAGAAACGATCATTATATGTCAGGGCC
CTCTTTGATTACGACAAGACTAAAGACAGCGGCCTTCCGAGCCAAGGACTTAACTTCAAG
TTCGGTGATATTCTGCATGTTGTTAACGCGTCAGATGATGAATGGTGGCAAGCACGGCAA
GTTACTCCTGACGGAGAAAGCGAGGAGATTGGTGTTATTCCAAGCAAACGCAGAGTTGAA
AAGAAGGAAAGAGCAAGATTAAAGACTGTAAAGTTTAACTCAAAAGCAAGAGGGGACAAA
GGGCAGTCATTCAATGACAAGCGTAAAAAGAACCTCTTTTCCCGAAAATTTCCATTCTAC
AAGAACAAGGACCAGAGTGAAATGGAAACAAGTGATATAGACCGTAAGTATGTGGGGCAA
GCTGTACTTCTAAAACCGGCTGTTTTACCGTAG
>g584
ATGGAGGTGCCGTCTTTACAGCAGTTGGATGCCATGCAATACTGGCAGCTTCAGAAACTG
GCTAAAAGAGCGGGGTTCAGAGCTAACCTAAAGGCTGATAAATTGCTGAGAAGTTTAAAA
GCACACTTTCATCCGCTGGATACGACTGAGGATGTAAAAACGGGTACTGAAGGCAGCCAT
TCTGTTATTGAAACAAAAGGATTAAATGAAGAGATGAGTTCTGCAAGCCCCACACTGTCC
AACAATATTACAGTTGCTGTCAAAGAGAGTGATCCAGAAGAAGTTAAGGAGAAAAACAGT
GATAAAATGGACATGAGAAACTTGGACAGATCCAACTCTGAAATCAAGCAAAGGAAACCA
GTCAAGGCGGATGAAACAAATGAACAAACCCCTTTAGAAACTCCACAGAAGACTGACAAA
CGCTGTACTCAAAATCCTAGATGTGGTCCTGATGTGACAGCTGATGGAAAGACCCCTATA
TACACTGCTCATCTTACTAAATCCAGTTCAAAACAATCCACACCAAATTTTAAAAAACTA
CATGAAGCCCATTTTAAGAGAATGGAATCCATAGATAAGTACATGGAAAGGAAGCAGAAG
CGTCTGGAAGCAGTTAGCACCTCAATTCACAAAGTTAAGGAAACCATAAAAGGCAGGTTA
TCTTTATTGAGCCCTGCAAAGTGGACAACAATTCCTCATTCACCTGTGGGACGTTCTGCA
GCGCTCCCCAAAAGCAGCTTGGCCAATACACTCAAGTCATCTGTCTCTTCCTCAAAAATA
AACAATCGATTTTCTGAGGCAACAACACCTAATGAGCATAAGGGATGTCCAGTCGGAAAA
CTGTCTTCCACTACTGATAATGTGACTACAAGAAGTTTGCGATCCATCGGGAATGCCATC
CCTCCTCCTGCTACAGTCAAATTTGAGCCAGCAATCACTGCTTTGACGTTTAGTGCTGAA
ACCCCCAACAAAAGCAAAAAAGCAAAGTTTGATCTTCAGGCAAGCCTTGCCCGGCCCCTT
GCCTATCATCCATACAAAGGCAAACTTAAACCTTGGAGCGATTCTAAGGAAAAGCAGTCT
ACAATAAACACAAAAGTATCTCTTCTTAAAAATACTTTCAAGCAACCCCATCTTCACACC
AGGGAAGACAGGCGCAGACAACATGAGAAGAACAGAAAGAACAAGCGAGACCAGGCATTG
GAAACCAGAAGAGGAGTTGAACTTCCATAA
>g596
ATGGCTGCAGCTGAAATCCCCGGTTACCTTCTGTCTTCTCAGAGCGAGAAGCACCGGAGG
GCCAGGAACTGGACGGACGCCGAGATGAGGGGCCTGATGCTGGTCTGGGAGGAATTCTTC
GAAGAGCTGAAACAAACTAAACGGAACGCCAAAGTTTACGAGCGAATGGCCAACAAGCTG
TTTGAGATGACGGGGGAGCACCGCCACGGGGAGGAAATAAAGATCAAGATCACCAACATG
ACCTTCCAGTAC
>g591
ATGCGGATTCCTCGGTCCTTTCACGTCTCCCTGCTCAAGCCTTACGTCTCCAACCGTCAC
TCCGTTCCTCTCCAGCCTCCTGCTCCACTTGTCGTCCGGGGCCATGACGAATATGTCGTC
GATCGGATCCTCGATTCCCGCCGGGTGCGGAATGGACTCCAGTACCTTGTTGCCTGGAAG
GGGTACGGTCCTGAGGAGCGGACGTGGGTGCCTGCTCGCTTTGTTCACGCTCCCCGTTGC
GTCGCTCGCTTTCATGCGCTTTGCCCTCTTCGTCCCGCTCCGTCACGCTCGGTGCGGCTT
CCTGCGTGGGGGGTACTGCTCACGCGCGCCGCCGCCGCAGCTCCCTCTCGGCTGCTAATG
CCTTGCTCGTCCGGCAGCCGGCAACCCCACCTCTGTCCCTCACCCGGGTTTACCGAACGA
GTAACGCGCGCCGCTGCTACCTTACCTTGGCCGCTCACGGACTGCGGTCCCCCGTCGTCG
ACAGCTCCACCTCCGGTCCTGCTTCGTCGGGCTCGCGCACCCGCTCACGTTCCAGGCGTG
TGGCCGCGCACACTCGCCGGGGAAACGGCGGAAGTGCGCCATCTGGTGGTGGCACCAGCC
AACGCACCTGAAATCAATTTAGGGCGCGACAGGCTCTACGGCGCGGCTGATGACATTTCA
ATGGTTGAGATTTACAATGAAACTGTGTGGGATTTGCTCTCACAAAATGGAAACAAACAG
CTGGAGATCAGATCACAAGGGAAACTTGTGACTCTACTGGGGTTAACAGAAATGGAGGTC
TTTACAGAAGATGACATCAAAAAGACAATGTCATTTGGTGAGAAGAATAGAACAGTTGCA
TCAACCAAGATGAATACTGAAAGCTCCCGCTCTCATCTCATGGTGATCATGCGGGTGAAC
AGTGTTGACAGCATTTCTGGTGTTGTGTCATCAGCTACACTTACATTGTGTGACTTAGCT
GGATCAGAACGCATTTCTAAAACAGAAGCTACAGGACAACGTTTGGTAGAGGCTGCGGCA
ATCAATAAATCTTTGACTGCATTAGGACAGGTGTTCGCAGCACTAAAGGGTAATTCCCTG
CATGTCCCCTACAGGAACTCTAAACTTACCCATCTCCTCCAGCCGTCACTCAGTGGTCAT
GCAAAGGCATGTGTTTTCGTGAATATTAGCCCTGATATCAAGGATTTTGGAGAAACTTTA
AGCTCACTTCAGTTTGGTTCATCAATCCAGCAAATAGCACTCGGCAAACCCATGCAGAAC
TCTGTGAAGCCTGCTTACTGA
>g599
GTCTGCTGGAAGGATGAGGTTGGATCGGAGCTGGCGTACGGCGGTTCTGTGCTGGCGGGG
AGTATCGTCCTGATCATCCTCTCACTGATCGTGTTCGTCTCTCTGCTGTCGCTCCATCTG
CAGGTGAACGTCAAGCTTAGCAGATATCAGGAGGAAAGGGATGAGCTGAGCTTTAATCGG
AGCATCTTGATGGAGTTTCTAGAAGAGCAGGCCCTGAGCCTCCTCCTGCGAGCCAACCTG
TCCTCCTTACTACAGAAGGCCCTGCAAGACCAGACGTTACCCCAACTTCTCCACCACCAA
GCGAAGAACCTGCAGGAGATCAACATGCTGGAGCAGAAATACCAAGAGGTCCAGGAGAAC
TACACCGTCCTATGCAAGGAGTTCGAGACGCTGGTGGAAAATCACCTACTTGTCCCCCGA
GAGAGCGTCCTGCTACAGAACTGCCAACCGAGGGAGTCAGGGGCCGCTGGTAAGACCTGC
CTTTATTGCCCCCCAGGGTGGCAGCTCTACGAGAAGTCCTGCTACCTGCTGTCTCCACAT
GCTCTCATCTGGCAGGAGAGCCTGCAATGGTGCCGGAGGCAAGGAGGTCACCTGGCTGTG
ATTAATAATGAAGACACGCAGTATTTCATGCAGGGGTTTGTGAAGAGGACCTCCTGGATC
GGATTGTCGGACCGGGATATAGAAGGAGACTGGCGCTGGGTAGATGGAACCCCCTACGAT
ACGACCCCCAGTAACACGGGAGGGGAAATCATTTCGGAGCTGGCTCTGGATGTCTGGAAG
GCAGGAAAGAACAGAGAAGACATCAGACTGTCCGACGTGGAGCATCGCCTGTCTCTGTCT
GCCTTCAACAATAAGGACAGTGGATTTTGGCACAGCAGTCTCATAGACAAGAACGTCATT
GACTTCTTTGTGCCGTTCTTGCCTTTGGAGTTTCGGCACGTGAAGATGTGCGTTCGGCAA
GAGCTCCGGGAGCGCGGCTACGAGGTGGACGAGGAGATCGTGGCCAACGTTGCAAAGGAG
ATGACTTATTACCCCAGGGAGGAGCAAGCTTATTCCGTAAAAGGCTGCAAAGTCGTCTCC
ACTAAACTGGATTATTATCTATGA
>g604
ATGTACGATAACGCCATCGAAGCCATCGAGAAGCACTTAATCCGCAAGTCAAACGGCGGC
CTGACGTTCATCGGCGAGTGGAAGAACGGCCACCTGGAGAGGAAGATGGGCCACCTGACC
TGTTTCGCCGGCGGGATGCTGGCTCTGGGCGCTGACGGCTCCCCGGGAGACAAGGCCGGG
CACTACTTACAGCTGGGCGCGGAGATCGCACACACGTGCCACGAGTCCTACGACCGAACG
GTGCTGAAGCTGGGCCCGGAGGCGTTTAAGTTTGACGGCGGTGCCGAGGCTGTAGCCGTG
CGGCAGAATGAGAAGTATTACATCCTGCGGCCGGAGGTGATCGAGACGTACTGGTACATG
TGGCGCTTCACCCACGACCCCAAATACCGGCTCTGGGGCTGGGAGGCAGCTCAGGCCATT
GACAAGTACTGCCGCGTTAGTGGGGGCTTCTCGGGGGTGAAAGACGTCTACTCCTCTGTG
CCAGCTTTCGACGACGTTCAGCAGAGCTTCTTCCTCGCGGAGACCCTCAAGTATCTGTAT
CTCCTCTTCTCCAGCGATGACCTTTTGCCGTTAGATAACTGGGTATTCAATACAGAAGCT
CACCCGCTGCCGGTCATCCGCCTGGCCAATAGCACTCTTCCCGGGAGTCACGTGGTGCGA
TAG
>g611
ATGTCATGGGTTCGGGCGGCTGTGGAGCAGCAGGAAGGGGAGGAAGTGTTTGATGAGGAT
GGAGACGAACTGAGTCTGTTGCAAAAGGACTGGAAGCGATCCATGGAGAAGCGGTTGAAG
GAAGGGTATCTCGATGGAGTAGATGCTGGAAAAGGAAATTCTCTCCAGAGTGGATTCAAT
CAGGGATATGAACTTGGAGTGAATATGATTATGCCTTACGGTGAAATCAGAGGAACCTTA
AGTGCACTTTTGACATGGTGTCAGCTTCATGACCCTGGACCTGCGGTGACCACGAAGCTT
AATGATCTACTGACCTTGGTATGTCAGTGTGAAGACCACTTACTGAGAGGTCTGTCTTCC
ATTTACCAGACACCCCATCCTTCTGATTTGTCCACGACTTTGGAAGATATAGGTCTGGCC
AGTGTTGAATGTGGAGGAACGGATAAGCAAAACCCGTGTACAGAAGGCCGGGACTGTTGT
CGGATCCAAGACTCTCACTCATCTCCATTTGCCAGCTGAAAAGAGGAATTTGCATACTCG
AGGCTTTTCTTGGCCTCAAAAAGCAGATCAGTTGTGGACCTGACCTCGAATTTGTGA
>g603
ATGCTGACAGCAAGCTCTGTCTCCCAGGAGGGGAATTATACCTACTTCGGACCCTCTCAG
AGCACTATTTACTGTCAGGAATATCTAATCAATCAGCTTGATGCCTGTGAGGTAACATTC
CTGAGCGGAGTCTCGGTGTCTCCCGATCACATGAAGACTCCTCCAAGAGGAGAGGCAGCT
GTCCCCTTCCCGCCTACAGCGGCCCGAGCATCTCCCGAGAGCTTGGAACCACCTTGTTGC
CCCACTGGGATGTTTAAGGCAAATCAGGGTGATGAGAGCTGCATCCATTGTCCAATTAAC
AGTCGCACGACGTCTGAAGGGGCCACGAACTGCGTGTGTCGGACTGGATACTATCGAGTA
GACTCAGACCCCATCCAGATGCCATGCACCACGACACCATCTGCTCCGCAGAACGTGATC
TCCAGCGTGAACGAGACGTCTCTGATGTTGGAGTGGTTGCCTCCAAGAGACTCTGGGGGA
CGTGAAGATCTTGTCTACAATATAATCTGCAAGAGCTGTGGATCCGGCCGCGGGGCCTGC
ACACGGTGTGGAGATAACGTACAGTTTGCCCCACGTCAGCTTGGCCTAACGGAGCCGCGG
GTTTACATCAGTGACCTCCTGGCCCACACCCAGTACACCTTCGAGATCCAAGCAGTGAAT
GGCGTAAACGACCAGAGTCCGTATTCACCCCAGTTCGCATCCGTCAACATCACCACCAAC
CAAGCAGCGCCATCCACCGTGTCCATCATGCACCAAGTCAGTCGAACTGTGAACAGCATC
ACTTTATCTTGGTCCCAGCCCGACCAGCCCAATGGTGTCATTCTAGACTACGAGCTTCTG
TTTTATGAGAAGGACCTTACTGAACACAACTCATCCGTGGTAAAAAGTTCTACCAACACT
GTGATAGTGCCAGGTCTAAAAGCGGGCACTATATACGTCTTCCAGGTGCGCGCACGCACG
GTGGCAGGTTACGGCCGATACAGCGGCAAGATGTATTTCCAGACCATGACGGAAGCTGAA
TATCAGAGCAGCTTCCAGGAGAAACTTCCCCTGATTATTGGTTCCTCCGCCGCAGGCCTC
GTCTTCCTCATCGCGCTCGTGGTCATCATCATTGTCTGTAACAGAAGACGAGGCTTTGAA
AGAGCCGATTCCGAGTACACAGATAAGCTCCAGCATTATACCAGTGGCCACATGACTCCG
GGAATGAAGATTTACATTGATCCCTTTACCTACGAGGATCCAAATGAAGCTGTCAGAGAA
TTTGCCAAAGAGATTGATATTTCCTGCGTGAAAATTGAGCAGGTGATTGGAGCAGGAGAA
TTTGGGGAGGTTTGCAGTGGTCACCTGAAGCTTCCCGGTAAAAGGGAGATTTTTGTGGCA
ATAAAAACCCTGAAGTCTGGGTACACAGAGAAGCAACGGCGAGACTTCCTGAGTGAGGCT
AGCATTATGGGACAGTTCGACCATCCCAACGTGATCCATTTGGAAGGAGTTGTAACCAAA
AGTTCTCCAGTGATGATCATCACGGAATTCATGGAGAATGGGTCCCTGGACTCCTTCCTA
CGGCAAAATGACGGTCAGTTTACTGTGATCCAGCTGGTGGGCATGCTGCGGGGCATCGCA
GCCGGCATGAAGTATTTAGCTGATATGAACTACGTCCATCGTGATTTGGCAGCACGGAAC
ATCTTAGTGAACAGTAACCTGGTGTGCAAGGTGTCAGACTTTGGTCTCTCTCGGTTCCTA
GAGGATGATACGTCAGATCCAACGTACACAAGTGCCCTGGGTGGTAAAATTCCCATTCGA
TGGACGGCGCCAGAAGCGATCCAGTACAGGAAGTTCACCTCCGCCAGTGACGTTTGGAGT
TATGGCATTGTCATGTGGGAGGTGATGTCATACGGGGAGAGGCCGTACTGGGACATGACC
AATCAAGATGTGATAAATGCCATTGAGCAAGACTACCGACTGCCACCTCCGATGGACTGT
CCAAACGCCCTTCACCAGCTCATGCTGGACTGTTGGCAGAAGGATCGGAACCACAGGCCA
AAGTTTGGACAGATTGTTAATACGCTGGATAAAATGATCCGGAACCCAAACAGTTTGAAA
GCAGTGGCTCCTCTATCTTCTGGAATCAACCTCCCGCTGCTAGACCGCACGGTACCCGAT
TACACCAGCTTCAACACTGTAGACGAATGGTTGGACGCCATTAAAATGGGCCAGTACAAG
GAGAGCTTTGCCAACGCTGGCTTCACCTCGTTCGATGTTGTATCACAGATGATGATGGAG
GATATTCTACGAGTTGGGGTGACCTTAGCTGGACACCAGAAAAAAATTCTCAACAGCATC
CAGGTTATGAGAGCACAGATGAATCAGATCCAGTCGGTAGAAGTTTAA
>g617
ATGAGTTATGATGAATTCGTGGATCTGGGTATTGACCCCAAAAAGCTGGTGATGGGTGTT
CCGTGGTACGGGTACGATTATACCTGCCTCAACTTATCAAAGGGTAACACATGTACTCTA
CACAAGAAGCCTTTCCGTGGCGCCCCCTGCAGTGACGCTGTGGGGTATCAGCTGGCGTAC
AGCGCGATCATGAAGCAGGTGAACGGATCGAGCAGCGGGAGGCTGTGGGACGAGAAGCAG
AAATCTCCCTTCTATAACTACAAGGGTGTAGATGGGAACGTTCACCAAGTGTGGTACGAC
GATCCGCAGAGCATCGCGCTGAAGGTGGCGTATGTGAGAAAGCGTGGCTTGCGTGGCGTT
GGCATGTGGAATGGGGATCTTCTAGATTACTCCTCGGATCCTGTTGCCCAGCAGCAGACG
GTGGCCATGTGGAACGCGCTGATTCCGTGA
>g610
CCAGGGCTTTTAAATATTACAGAACCTGCCACACAACCTTGGCTGGCAGATACCTGGCCA
AACACTGGAAACAATCACCAAGAATGTCCCATCAATTGCTGTACATCTGGGAATGGAAGC
AGCGACAACAACCTTGCTACCTACAGCCGTCCAGCTGATTGTATCGCTAACTACAACAAC
CAGCTGGACAACAAACAGACAAATCTAATGGTGCCCGATTCCGCGATTTATGGTGATGTG
GATCTAAGCAACAAAATCAATGAAATGAAAACCTTCAACAGTCCTAATCTGAAAGATGGA
CGCTTCATCAGTGCAGCCGGACAACCCACCCCGTATGCAACCACTCAGCTCATTCAGTCA
AACATAAGTAACAATGTGAACACTGCTGTTGGCGATATGGATGAAAAGCATTGGAAACCT
CCCTCTCAACAGAAACCAGATGTTGCCCCGATGCAGTACAACATCATGGAGCAAAACAAA
ATCAACAAAGATTATCGGGTTACAGATACGATGCCTGCAACAATTCCTTACAGCCATGAC
CAGAATACAGGGGGGTCATACAACAGTTCAGATCGAGGAAGCAGCACATCAGGAAGCCAA
GGTCACAAGAAAGGGACGCGTACGCCTAAGGTTTCTAAGCAGGCTGGTATGAACTGGGCA
GATCTATTGCCCCCTCCTCCAGCACATCCTCCACCACATGGCGCCAGTGAGGAATACGCA
TTATCGGCCGATGAAAGTTATGACCGAGAACTGCCTTGTCCAATGCCGCCATCAAGAATG
TATCTCCAACAAGATGAGCTGGAAGAAGAAGATGAAAGGGGACCAACTCCACCTATACGA
GGGGCTGCCTCTTCTCCAGCTGCTGTATCGTATAGTCATCAGTCCACAGCCACTCTCACA
CCTTCTCCCCAAGAAGAGCTTCAGCCGATGCTTCAGGACTGTCAAGAGGATATTGGTCAT
ACTCAACATCAACTGGAAAGAAGGCGTCATCAGATAAGTCCTCCACCTCCTCCAAGGCCC
ATATCTCCACCCCATACTTATGGCTATATTTCTGGACCAATAGTCTCGGACATGGATACG
GATGTTCCTGAAGATGAAGGAGATGAAATGGAAGTTGCAAAGATGCAGAACCGCAGACTT
CTTTTGCGTGGCTTGGAGCAGACCCCTGCCTCCAGTGTCGGGGATCTAGAAAGCTCAGTT
ACTGGTTCTATGATCAACGGTTGGGGCTCTGCTTCAGAAGAAGACAATGTCTCCAGTGGG
CGATCTAGCGTCAGCTCATCTGATGGCTCATTTTTCACGGATGCTGATTTTGCACAAGCT
GTCGCAGCAGCTGCAGAATATGCTGGACTTAAAGTAGCAAGACACCAAATGCAAGAAGCA
GCGGGAGGCCGCAGACATTTTCATGCATCTCACTGCCGGCGACCTACAAGTCCTGTGTCG
ACGGACAGCAATATGAGTACTGCCGTCATGCAGAAAACTCGCCCTAGCAAGAAACCAAAA
CACCAACAAGGACATCTACGAAAAGAGGTCTACACAGACGATCTACCACCGCCACCCTTG
CCCCCTCCTGCTTTAAAGTCTCCGACTGGTCCATCCAAAGCACAGCTAGATGTGCGCCCC
GGCTTCTCACAAAAGTATGCTGCACCGGATCAAAGACTAGAAAGACCAGGGGAGAGAAAA
GGAACCAACTACAGAGGGAGAGAAGGAGGAGAGAGCAGACAACAGGCGGATATACGGACT
AATTCAGGAGAGAGGAGAGAACCTCTAGAACATCAGATTGATGAGAAAATGAAAAGAGGA
AAAACGGGAAAACGAGAAACCACACCTCTTCAAGAGGACATTTTACCATATTGCAAACCC
ACATTCCCCACATCGAATAACCCTCGAGATCCTAGCTCCTCCAGCTCAATGTCCTCAAGA
GGTTCTGGTGGCAGGAGAAGGACAGATCAAACCACCGGACGCAGGAACGCTGCCGAGATG
CAACTCTTAGGAACATATGAGCGAGGCGTAGATGAAGATGAAATAGAGGTGAACTTGCCG
AGACAGTACAAACTGAATTCCGTTCTTCTAGAAAGTCAGAGACAATCCTGTCCGGGAAAA
GTCAAATAA
>g620
ATGACGGAGCCCATTGTGGTCCTCTGTGGGTACGAGGTGGTGAAGGACGCCCTGGTGAAT
CAGAGCGAGGAATTCAGCGGCCGCCCGGTGCTACCAACAGTAGAGCATTACACTAAAGGA
TACAGTTTTATTAGTAGGAGTGAGTCCTGGCGCTCATTCAGACGCTTCCTTCTGACCTCG
CTGAGGAATTTCGGGATGGGGAAGAGGAGAATGGAGGAGATCGTCCAGGGGGAGGCCGAG
CAGCTGATCTCTGCAATCTCTTTAACTAAAGGAAAAGCCTTCAACTCCATCGGACTCCTC
GGATCTGCAGTAAATAACATTGTGAGCTCGATCCTGTTTGGGGAGAGGTTTGAATACCAT
GACCAGAGACTAAAGGAACTTATACTGGCCGTGAGAAAACATGCTAATAGCGTGCTGTCC
CTATTTCATCAGGTCTGTAACGCGTTTCCAATTCTGATGAAGCTTCCGGTCATCAGGAAG
AAGTTATACAAAGACACGTTCGACATATATCACTTTGTCAGAAAAAAAGTTCATCGCCAC
CAGGAAAATGTAGACCTGACGTCCCCCAGGGATCTAATCGATGGCTTCCTTGCAAAGATT
AAAGAGGAAGAAGGAAACCCCAGGACCCACTACAATGAGACCAGCATCATAACGTTGTCT
GGTGGCCTCTTTATAGCTGCTACCGAGACCACGTCCAGTACCTTGAAGTTCTGCCTATCT
CTTATGACCCATTATCCCGATGTCCAAGAAAAGGTCCAGAGAGAGATTGATGAGGTCGTC
GGGCCCCAGCGTCTTCCTGGGATCATGGATAGAGCCCAGCTGCCGTACACCAACGCCGTG
ATCCATGAGTGTCAGAGAGTGCTGGATCTGGCACCAATTGGTCTTTACCGCGCAACCACG
ACAGACACTCAGTTTAGAGGGTTCACCCTCCCCAAGGGGACCACAATCATCCCGTTCCTC
TCGTCAGTGCTGTCTGATCCCACCCAGTGGGAGACCCCTGAGGATTTCAACCCAGGGCAA
TTCCTGGATAGCAAGGGGCAATTCCAGGCAAATCCGGCTTTCATGCCGTTCTCTGCAGGG
AAGCGCGCATGTCTCGGGGAGCCCTTGGCTCGGCTGGAGCTCTTCCTTTTCTTCACCGCT
CTGCTCCAGAGATTCTCCTTCCGCCTGCCCCCGGGTTCTGAGACCCAAGACTGGAAATCT
CTGAAAAGCCAAAAAGCAGAGCTCATTGTGACCTCCGAGTTCTGTGCCGTCTCTCGCTCG
GTGGTCTCGAAATGA
>g624
ATGGCGTCTAACAGTAACTGGCTGTCTGGGGTGAACGTGGTGCTGATTATGGCTTACGGG
AGTCTGGTATTCGTCCTGCTCTTCATCTTCGTGAAGCGGCAAATAATGCGGTTCGCCATG
AAATCTCGCAGGGGGCCTCACGTGCCGGTCGGACACAACGCACCGAAGGAACTCAGGGAG
GAAATCGACATTCGCCTCTCCAAAGTGCAGGACATCCGGTTCGAACCCCGACTCCTGGCG
GAGGACGACGCTCGCTTGCTACAGCTGGATAAGCCGGAGCAGGAAGGCTGTTACAATTAC
CTGTATCGGATGAAGACGTTGGATGCGGTGAAAGATTCCGACATCCCCTTCCGGGACAAC
GTAAAATACCCCCGGACCCTGGTGGGAAAGAACTTCCGTTGCTTCCTCCTGGAGCTGCAA
AACTCCAGCTCGCCGTACAAAGGGATCCGCAAGAGTTTGTTAGATGCGCTCATGGCAGGC
TATGACAGTGCGCGATACGGCACTGGGTCGTATGGAAAAAACCAACACCTGAAGTTCATG
GATTCACTCAGGGAGCTTTCGACAATTGTGCAAGCCAGAGAGGCTGGAAGTCAGAGGCAG
CGCCAGTCTGCGGCCCGGGACCTCAGCGCTTCCCCAGAGCCCTCCGGGACGCCCACCATC
CAGGTGACCTACCTGCCCTCGAACCAGAAGAGCAAGCGGCCAAAACACTTCCTTGAGCTA
AAGAGCTTTAAGGACAATTACAACACCCTTGAAAGCACCCTGTGA
>g616
ATGAAGCTCAGGACCCTGCGCGAGAGACTTGGAGAGTTTCTGGGGGAGGACGCAGCGATT
GACAAGTTCTCTTTCCTGAAATGCGTTGGGAGAAGCCTGGCCGTGGTTAAAGGGAAGCAA
GAGTTAGAGTTGAAGGTGAAATCGTTTGCCCCGCCGCAGGCCAGTCAGCCGGAGCTCTAC
CTGCTCCCAGGAGTGGAGAACGAGGGGAGCTCCTATGGGTCATCGGTAACTCCGGAAGGA
CAGAGATACAATGTTGACCGCTCTGGGTTTGGGGTCCCGTTGCCACGGCAAAACGTTCCC
CCGTGGGATCAGAGCCCCCCCGTTACTGAAAGCCACGAGAAGACCCCCAGAGCTGCTCCC
AGAGAAGAGGAGGATAGAAGCTTCATCTCCAGGAGGGGCCAAGCGGAGGCCACGGCGCCC
TACCAAGGACTGAGCACAGAGAAGCAGGGGATGGACAGAGGTGGGTCGCCCTCGGGGACA
GAGGTTTGGGCAGTTAATGCCTACAAGGCCCTAAGCCAGCCGTGCTACGGCCCACATGTA
ACAGAGCCCAGCTGCGTGGGCCAACTCGTGGCACCAACACACCGAGGAGATCAAATCTCC
ATCGCCAGGCGTGTGAAGGATGGCGGCCGCGTCTCTCACGTCACGGAGAAGCCGCCGGCG
GCAGGAAGCGCGGAGAGCGACTCAGGGATTTCCGAGACGTTTCACGGCCCAGACGTGGGA
AATGAACCCCGGAAACGTGCCGAGCAGGCTGTGCGTGCAGATGAGACGCAGCTTGGAGCG
AGCAGAGCTCTGCAGAAGCCTGCGCGGTACCGCTCTCCGCCGACCCCTCCACCTCCACCG
GCCTTTCCCCCCGTCCAGTCTCCTCCGCCAGTCATCCCAGAGCCGGAGGAGACGCTCCTT
CGGCAATTAGAGAAGACGAGAGAAGAGCGACTGAAGCTGGAGAAATCCCGCGAAGAGCTG
CTGAAGAAAACCAAGTCCTTGCTGGAGCAATATAAACTGAGGAGACATCAAGTTCGGGAT
TCATGGAAAAAGAAATATTTTGAAACAAAGAAGGAGACGTTGTTGCTGGAGGACACGGTG
AAGAGACTGCGCGTGGACTTGGAGAACTCCTACCAGAGGCTCCTGGCGCAGCTGGCGGCA
AGAGACGGGCGAAGACGGGCAAAGAAGTACCCGGCGCTGGCAGACGGCTCAAAGGTATTT
CACTGCCACGGAAACGTCTGCGTCAGCCAGAAGGATGCGGGTGGGAAATGTCCGTGGCCC
CGGAATTCGGTAATTATGACGATAACCAATCGGCAGCAGGAACTGGATCAGCTGAGGCGC
CACGTGGAGAACGCGCGGATCAAACTCCTCATCGAGATCAAGATGCGGAAACAGGCGGCG
TCCGACCTGAACGTCCTCAAAGCACAGCTGGCCCAGAAGAAGGCCCAATCGGCCATCGCC
GCCCCCCCTGTCTTTGCCATGTGA
>g626
ATGACCAGCATTGAGGCCGTCAAGAGAAAGATCCAGGTCCTGCAGCAGCAGGCGGACGAT
GCAGAGGAGAGAGCCGAGAGACTCGGCCGGGAGGTGGAGGGAGAGAAGAGGGCTAGGGAG
CAGGCCGAGGCAGAAGTGGCCTCTCTGAACCGCCGAATCCAGCTGGTGGAGGAAGAGCTC
GACCGTGCGCAGGAGCGCCTCGCCACGGCCTTACAGAAACTGGAAGAGGCCGAGAAAGCA
GCGGACGAGAGCGAGCGGGGGATGAAGGTTATAGAGAACAGAGCTTTGAAAGACGAGGAG
AAGATGGAGCTGCAGGAAATCCAGTTGAAGGAAGCCAAACACATAGCAGAAGAGGCCGAC
CGGAAGTACGAGGAGGTGGCCCGCAAACTGGTCATCATTGAGGGTGACCTGGAACGTACG
GAGGAGAGAGCAGAGCTGGCTGAATCCCGAGCCCGCGAGCTGGAGGAGCAGATCCGACAT
TTGGACCAGAACCTGAAGTGTTTAAATGCCTCTGACGAGAAGGTACTGTTTCCTCGGTCT
CGAGCTCCCATGTCCCCCTCTGTTCTAGCCGTATGCTTTCCTGCTCGCTCCTTCTCCTGC
TCCAGCAAATGTGCTGAGCTGGAGGAGGAACTGAAAAATGTCACCAACAACTTGAAATCC
CTGGAAGCCCAGGCAGAGAAGGCTGAAACTCGGGCAGAGTTTTCTGAACGGTCAGTGGCC
AAACTGGAAAAGACCATCGATGATTTGGAAGACGAGCTCTACGCACAGAAGCTCAAGTAC
AAGGCCATTAGCGAGGAGCTGGACCACGCTCTCAATGATATGACTTCCATGTAA
>g628
ATGGCTGCTGGTGACAGTGGTACTCCTAGGGTCACATTCCTGGCCCCTGAAGGTCATGAT
GAAGAGGTGATACCCAAGAAGCTGGGAAGACTGACAGTGAAATATAATCGCAAAGAACTA
CAACGCAGAATTAAACTAGAGGAGTGGATCGATGCCCAAATCCAGGAGCTATACCAGAGC
CAGGAGGAGCGAAGGGATGAAGATGCTGAACCTGAGATTGATATTGATGATCTTCTACAT
CTGACTGTTGAAGAGCAGAAATCAAAGCTACAG
>g633
CTGGACGGCCTGTCTGAGCGCTGCGCTCAGTACAAGAAGGACGGCGCTGACTTTGCCAAG
TGGCGCTGCGTGCTGAAGATCTCCGAGCACACGCCGTCTCACCTGGCCATTCTGGAGAAC
GCCAACGTGCTGGCCCGCTACGCCAGCATCTGCCAGCAGAACGGGATCGTCCCCATTGTT
GAGCCCGAGGTCCTCCCCGACGGTGATCACGACTTGAAGAGGTGCCAGTACGTCACTGAG
AAGGTCCTGGCCGCCGTGTACAAAGCTCTGAGCGACCACCATGTCTACCTTGAAGGAACC
CTGCTGAAACCCAACATGGTGACCCCTGGACACGCCTGCACCAAGAAGTACTCCCCCGAG
GAGGTGGCCATGGCCACAGTCACGGCTCTGAGGCGCACTGTCCCCCCAGCTGTCTCTGGA
ATCACTTTCCTGTCCGGAGGTCAGAGTGAGGAGGAGGCCACCGTTCACTTGAACGCAATC
AACAACTGCCCCCTGCACAAGCCGTGGCCCCTGACCTTCTCCTACGGCCGCGCTCTCCAG
GCCTCTGCCCTCAAAGCCTGGGGTGGCAAGAAGGAGAACGTGAAGAACGCTCAGGAGGAG
TACACCAAGCGCGCGCTGGCTAACAGCCTCGCCTGCCAGGGCAAATACGTGCCGAGTGGT
CAGGCCGGCGCGGCGGCCGGGGAGTCCCTGTTTGTGTCGAATCACGCTTACTGA
>g631
ATCTACATATTTTATGGCACTCGTTCAAACGCTGAGTTTGTGATCCACAACGGCTTCTTC
TTTGAAAATAACTCGCACGACCGCGTGAAAATAAAGCTGGGCGTCAGTAAGAGCGACAGG
CTCTATGCCATGAAGGCCGAAGTCCTCGCCCGGGCTGGCATCCCCCCATCCAACGTGTTT
GCCCTGCATATCACGGAGCCTCCGATCTCGGCCCAGCTCTTGGCCTTCCTTCGGGTCTTC
TGTATGAGTGAGGATGAATTGAAAGAACATCTGATAGGAGACCACGCCATCGATAAAATC
TTCACCCTTGGCAATGCCGACTTTCCAGTGAGCTGGGACAATGAGATCAAGCTGTGGACA
TTCCTCGAAGCCAGGGCTTCTCTCCTCTTAAAAACATACAAAACCACAGTAGAGGATGAT
AAAGATATTTTGAAGCAGGGAGACTTGACATTTCATTCCTTGATGGCCATCAAGCTGCGT
CTGGTGGAGAAGGAGATTTTAGAAAAAGCCGTAAAAAGTGCGTCTGACAATCGGAAGCTG
TTTACTAAGAACTCTGAGGAAGGAATTCCTCTCCCAAAATACGAGGAGAGCAACATCGCG
TTTCTCGAGAACAGCGATTCCAAACTCCCTCTGGTGCTGCGGAATCTGGAGGAGGAGGAG
GGAGACGCGGGGCAAGGAGATCTAAAGATCCAAGAAGCCATCGCCATCTCCGAGATCACC
GAGAACGGTTTAGTGAACGGAAAGGACTCTCTACCCAACGGGACCAAACCCGATAACGTC
CTCGCGGGAAGAAACGCCACGGAAAACGAGAACGCCAAAGATTTTCCTTCAGAAAGTACC
GAAGAGGCAAAAGTGCAACTGTGA
>g634
ATGACGGAGATCAGCGACCTGGACCGTCAGATCGAGCAGCTGAGACGCTGCGAACTCATA
AAGGAAAGCGAAGTGAAAGCCCTGTGTGCCAAGGCCCGAGAGATCCTTGTGGAAGAGAGT
AACGTCCAGCGAGTGGACTCTCCAGTCACGGTGTGCGGTGACATCCACGGCCAGTTCTAT
GACCTCAAAGAGTTGTTCAGAGTGGGAGGCGACGTCCCCGAGACGAATTACCTGTTCATG
GGGGACTTTGTGGATCGAGGATTCTACAGCGTAGAAACATTCCTGCTCCTCCTCGCCCTG
AAGGTCCGCTACCCAGACAGGATAACTCTGATCCGTGGGAACCACGAGAGTCGACAGATC
ACTCAGGTCTATGGCTTCTATGACGAGTGTCTGCGCAAGTACGGCTCGGTGACCGTATGG
CGATACTGCACGGAGATCTTCGACTACCTCAGCCTGTCGGCCATCATCGACGGCAAGATC
TTCTGTGTGCACGGCGGTCTCTCCCCCTCGATCCAAACGCTCGACCAGATCCGGACCATC
GATCGCAAGCAGGAGGTGCCGCACGACGGGCCGATGTGTGACTTGCTCTGGTCGGATCCT
GAAGATACGACTGGCTGGGGCGTGAGTCCGCGTGGGGCCGGCTACCTGTTTGGCAGCGAT
GTGGTGGCGCAATTTAACGCAGCGAACAACATAGACATGATCTGCCGCGCGCATCAGCTG
GTCATGGAGGGGTACAAGTGGCATTTCAATGAAACGGTGCTCACCGTGTGGTCGGCTCCC
AACTACTGCTATAGATGCGGCAACGTAGCTGCCATCCTGGAGCTCGACGAGCACCTACAG
AAAGAGTTCATCATCTTCGAGGCTGCGCCGCAGGAAACGAGAGGCATTCCCTCCAAGAAA
CCCGTCGCCGACTACTTCCTGTGA
>g635
ATGACCCTGGAGAACAGGGATCTGTGGAAAGAATTCCACGCCATCGGAACGGAGATGATT
ATAACCAAATCGGGGAGGCGCATGTTCCCCCAGTGCAAAGTCAGCGTGAGCGGCCTGGAA
CCCGAAGGCAAGTACCTGCTCCTGGCGGACGTCGTCCCCGTCGATAACTCTCGCTACAAG
TGGCAGGAGGATCACTGGGAGCCGAGCGGCGGAGCGGAGCCCCGGTTACCGGAGAGGGTC
TACATCCACCCCGACTCGCCCGCCTCGGGGGCCCACTGGATGAAGCAGCCCATATCCTTC
CACAAGATGAAGCTCACCAACAACACGCTGGACCAGATGGGACATATAACGCAACTCAAA
ATCCAGACCAATCCCTTCGCCAAAGGATTCCGGGAGGACGGGATGAAGACTAAGAGAGAC
CGCTCAGCGAAAGCGAAGAGGAAAGCGCCCGCCGGCGTGGATCAGGAGCCTTTCGAAGCC
GCTGAGTGTAAGCGGCCCCTGTATAGTGGCCCCTGCGACTCGACTCTGAGTGAGGAGCTG
GATATATCCGGGGGTCTCGGAATCCCCCTCCCCAGCCCTGACTGCTCCTTCCATCCCATC
ACGCCGCCTACCCCGGACCCCCCTCCACGGATGCCTCCGATCCACCCCCCACCCACGAAA
GCCAATCAGGACCCAGTGCCCGAGCTGGAGATGCCCCAGCAAGCCACAGACACCTTCCTG
CAGCCCGGACCACCGACTTACCCCGAGCAGCCCCGGGACAGCGGCATGTTCTCATGCCCC
TCCGAGACCCCCATCGCGCAGGTCCAGGCGGCCCGTCCACCGCAGTCTCTTCAGAGATTC
CCGCCATCCTTCCCAAGCGCCCAGGATCAACTAACCGACAGCCAATCAGATTTCAGGCTC
TACGGGTCAGACCTCGGCTGCGGAGGAGAATTTACCCCCTCGGCCTGCGCGGTTACCCCA
CCTGCCCGCAGCGAAGCCGGTGTCCGGGGTTACCCCATGAACTCTGACCTCCGCTTTCCA
CACTTCCTGCCCAACACCGGCCCAAAGCTGGGCCTGCAGTTTTCGGGGCCACAGCTGTCA
CGTTTGTACAGGGGGGGCGGCTGGTTGTGA
>g646
ATGGACACTTGGGATTACAAAAAAGAAGCACACAGACAACTCTCCGATGACAGACACTAC
ATCCAACTTCAGGAGGACCCCACAAACACCTACACTAAAACACTCAAGAATACCATAAAA
GCACTGCCGCCCAACATCAGGCAACAGGTGGAAGGCTTGGTGCCAACTGACCCCAGAGTG
GGCTCCTTCTACATGCTCCCCAAAATACACAAAGAGGGAAAACCCGGAAGACCCATAATT
TCAGGAGTCAGAACCCTTACACAAAACATTTCTGGCTGGGTTGAAAAAATCCTTAAACCC
TTAGTAAAGGGATTACCCAGTTACCTCCAAGACACCACCGATCTTCTCAACAAACTTACC
AACATTGGCGCAGTTCCTGAAGGCACCATTCTTGCCTTCATTGTGACGGTATAG
>g648
ATGGCTTTCGCTGGAACTTGGCAGGTCTACGTTCAGGAAAACTATGACAATTTCCTGAGG
TCTGTGGGTTTGCCGGAAGAAATTGTTAAGGTGGCCAAGGATATCAACCCAGTGATTGAA
ATTCAGCAAAATGGAGACAACTTTGTTGTCACATCAAAAACCCCTAAACAGACTCAAACA
AACAGTTTCACTGTCGGGAAAGAAGCAGAGATCAATAGCCCCGATGGAAAGAAAATAAAG
GTAACTGTGAATCTGGAAGGAGGCAAACTGGTGGCCAAGAGCGACAAGTTTTCTCACATT
CAAGAAATTCAAGGAAGTGAAATGGTGGAGACCATTACCATTGGCTCCGCAACAATGACA
AGGAAGAGCAGGAAGGTTTAA
>g659
ATGTTTATCACGCCTCATAGACTTCAGTGTGCACTGGGGTTCCATGCTGCAGAGAGTTTA
GGTCAATCAACCTCGTCAGATGCCACAGAGATAAAGAAGTCTCCATTAAAGCCATGTGGA
AAGGGCAACAAGAGGAAGCAAGAAGACCTTGATCTTGAAGAGCAGCACAGTTGGGTAACA
TTCATGACTGAAGATCTTCCAGATGAAGATCAGGATGATGACCCCACATATGAACCCAGC
AAATCTGACACAGACAGTGAAGAACACCATTCCAAAAATGAAACTGAAAGTGACATTGAG
ATTGAAGAAAAGGATGGGGTTGTCATGATCAAGGAGCATGTGGAAAATAGAGAGGAGGAT
TTGTCAAACAAGGAGGAAACACAAGGAGATCAACAGACAAATAGAGGGGAGCCAAATCCA
GACGGCAATGTCCAAAAAACAGATGGTGGTGATCAGGAAGCTGTCTCCTCTGCAGGTTCG
CAGGATGTGGATGTTGGGTTGATGCCGGACCTGGCCATGGAGGTGCTTTTGGGAAATGAT
CTGTGCAACTTGTCTTCTTCTTACTGTTGGATTTAA
>g665
ATGAAGCCAGACTATGTGACGACAGGCATTGTGCCTGACTGGGGAGACTACATTGAAATT
AAAAACGAAGATCAGATTCAAGGGCTACGTCATGCTTGTCAGCTGGCCCGTCATATTTTG
CTTATGGCTGGGAAGAGTCTAAAGGTTGGCATGACAACGGAAGAAATAGATTCTTTTGTC
CATCAGCAGATCATCAGCCACGATGCCTACCCATCTCCACTGGGCTATGGCGGGTTCCCG
AAATCTGTTTGCACTTCTGTAAACAATGTTGTTTGCCACGGAATTCCAGACAGCCGACCT
CTTCAAGATGGAGACATTATCAACATAGATGTCACAGTGTACAGCGGAGGCTTCCACGGG
GATACCTCTGAAACCTTTCTGGTGGGGAACGTGGATGCAGCCGGTAGAAAGTTGGTGGAG
ATAGCGAGACGATGCAGGGATGAAGCGATAGCAAAGTGCCGACCGGGGGCTCCTGTCTCT
GCAATTGGAAACACAATCAGGAAATGTTGA
>g658
ATGGCTGAAGGCGAGAAAGTAACAGAGCCTCCGTCGTCAGAGGCCGGTGGGCCCCCGGGA
GGCTTGACTTCTCTAGAGCTGCCGAGTTTTTCCGATGCCTGCGCGTTGGTGGACAGCCCA
TACTCATGCCTGGTAGTTGAGACCCACCGCAGGCACCTGGCCATGTCGCCTAAGTACTTA
AACAAGAAACGGACCGGTATCCAAGAGCAGCTGAACACCGAGCTATTAAAATACAACGAC
GGGTTGGGGGGTGTCCCCGTGGCATATGATAATATTAAACTTGTTAGTGAATTGGGTGAT
ATCTTCGATGACCTTGGGCACATTCATATTAATATCGAAGCAGATTTTGTCATTTTCCAG
CCTTCGCGTGGACAGATCCTTGTGGGCGTTGTCAATAAAGTAGCCCCAAGTCACATTGGC
TGTCTTGTCCATGGCTGTTTCAATGCATCGATACCAAAGCCTTTTAAAATGGCGATTGAG
GCTTGGCAGTATCTTGGAGTGAATATAGGGGATTGTATTGAGTTTGAAGTGTTCCGTTTG
GACTCTGACGCTGTGGGTGTATTTTGCATCCGAGGAAGACTAAATCCAAGAATGGAAGCT
TTAGCAATTGAAAGGTTAAATGATGCAAATGCCAACCAAGATGCCGGGGATGCTTCTGAT
CAGAAGGAGGATGTGCCTGCTGATGGCAGTTCAGAGTTGATAAGTGTGGAAAACCAAGAA
AAGACAAAGAAAAAGTCAAAGAAAAGGAAATATCAAGAAACAGATCTGGGCACGCAAGAT
ATATCTGAGGACTGCTCCACACTAGAAGAATCAAGTTTAGAAACTTCAACTCAGCAAACA
CCCAGAAAAGAAAAGAAAAAGAAAAAACGTCATGATACTGTAGTGGAAAATAGCGTGCTT
GTAGATGAAGCTACTCCCGATACTAGTACGCTAGAACTGGATGGTGAGACCTCAGCTCCT
ATCATTCAGGAAAAACGATCAAAAAAGAAAAGTAAAAAGAGCCGCCAGGAAAGTTCTGAG
GCTGATTTTGTTCAAAGTGGGCTATCAGAAGATGCAAGTTTTACAGAAAGTAGTACCTCG
GAAGAACTGGTAAAGATTAAGAAAAAGCATAAAAAACACAAGAACTCTTCATTTGAGGAA
GACCTTGACAAAAACATTTCTAACGGAGCTGTAAGCCTGGAATGCTACGATGAGCAAACT
GCTGAAAGCCTTGAGGTCTCCCAAGATGTGCCAAAGAAAAGCAAACACAAAAAGAAGCAC
CGGGAGCATTTAAGTGATGCTAGTGATTACCAGGTTGATAGTATCAATGGGCAAGAAAAA
AGGGAATTGTTAGATGTTTCCGTAACACATTCTGAGCCAAAACCTAAAAAACGGAAAGAA
TGA
>g664
ATGACCATGACTACAATGCCAGAGAGTATTAACAGCCCGGTGTCAGGGAAAGCGGTGTTC
ATGGAGTTTGGGCCACCGAACCAGCAGATGCCACCTTCCCCCATGGCCCATGGGCACTAT
TCCATGCACTGCTTGCATTCCGCAGCTCACTCCCAGCACGACAGCTCGTACAGCGGCGCC
TCATCCTTCTCCAGACCCCTGGGCTACCCCTATGTGAACTCGGTGAGCAGCCATTCCTCT
AACCCCTACATCAGTACCGTGCAGTCCTACCCCAACAGCAGCAGCCTCAGCCAGACCCGC
TTAGAGGAGACAGGGGCAGATTCTGAAAAGAGCACAGTGGTGGAAGGTGGAGAGGTTCGA
TTCAATGGCAAGGGCAAAAAGATTCGCAAGCCCAGGACTATATATTCCAGTCTGCAGCTA
CAGGCTCTGAACAGGAGGTTCCAGCAGACCCAGTACCTGGCACTGCCAGAGAGAGCAGAG
CTGGCGGCTTCACTGGGACTCACCCAGACACAGGTTGAAAATCTGGTTTCAGAACAAAAG
ATCAAAATTCAAGAAATTAATGAAACAGGGAGGAGCGGCTTTGGAAAGCAGCGCATTGGC
AAATGGTAG
>g663
ATGACCGGAGTGTTTGACAGCTTAGTGTCAGACATGCATTCAAACCAAATGACCTCCAGC
AGTTATCACGGGCTCCACAAATCGCAGGAATCCCCCACTCTGCCGGTGTCCACGGCTACC
GACAGCAGCTATTACACCAACCAGCAGCAACACTGCGGAGGGGGGTCCCCTTATGGACAG
CTGGGATCTTACCAGTTCCACGCCACTGGCATCAACGGGATCTCTTACTCTGCCAAATCC
TATGATCTGACATATAATGGTACTTACAGCACATATGGACCCTATGGAACAAGCCCGTCC
CCTACACACAATGACCCAGAGAAGGAAGAGGGGGAGCCAGAAGTCAGGATAGTGAATGGC
AAACCAAAGAAAGTCCGGAAGCCCAGAACCATCTACTCCAGCTTCCAGCTGGCTGCCCTG
CAGAGGCGATTCCAGAAAACCCAGTACCTGGCCCTGCCCGAAAGGGCCGAGCTGGCCGCA
TCCCTGGGCCTGACCCAGACACAGGTGAAAATCTGGTTTCAGAACCGGAGGTCGAAGTTT
AAGAAGATGTGGAAAAGCGGCGAGTTACCGACCGATCAGAACCCGGTAGGCAGCGAGTCT
CCGACGTGTAACTCGCCCGCCTCCTCCGCAGTGAGCTGGGACTTTGCATCACACCAGAGG
CTGCAGGGGTCGGGGTCTCTCCAGCCCCCCAACTCCGGATCCAGCCCCAGCCCATTCCTG
GGCAACTACTCCTGGTATCAGACCTCCAACCCAGCCTCACATCTCCAGTCTAACCCATTA
TTACAGCAGCAACAGCACCACCTCCACCACCACAGCACTGCGGTCACTGCTGGGACTATC
TTCTGA
>g671
ATGTTCCCAGAATGTGAGAGTGACGTGGACTGTCCGGATACGCAGAAGTGCTGCGACAAC
TGTGGCATGGCTTGTGCCGACGTCTTGCCAGGGCCCGAGGAGCCGTGCCCCGGCTATGAT
ATTAAAGACGCGGGGAGCCTTCAGTGTCCTTTCATATTCTGCACCAGCGATAGCGACTGC
CGCCTGGATCAGAAGTGCTGTCTGTCTGATGAAAGCCAGAAGTGTGTGAAGCCCCAGCCC
GGTAAATCTTCTCACCCCGTGGAAAGCGATGATTATTTAAGCAGCGGAACGTCGGCTAGC
GCGATGTATAAGTGA
>g666
ATGGGCAGCCTCTTCCTGCACATGCAGTCTCAGCCATATGTGGGTCCTCAACATGCTTTG
AATATCAGATGCAAAGCTGCAAGCTGTCACAATTTTATGTCCCCAAGGCTGCCTGACCAG
AGTCACCAACTGGCGGCTCGATTCGCATCGTTTGGCTGGCACAACAGCAGATGGTCTGAC
ATGGCGGGTCTCAGTGCGATGGAAAAGAAATTAGCGGAGTATAAGTGTGATACAAATGAA
GCCATCAAACTAAAATTAGTGCGCTTTCCAGAAGACATTGAAGACGACAGTGTGACCTTC
ATTCCAGAATACAGCCACCAGTTATTCGGGGATGATGAGGTGGCGTTTGGATATAAGGGT
CTAAAGATTCTTCTGTACTACAGTGCTGGAAACCTGTCCACAATGTTTCGTGTCCAGTAC
AGTTCTAAAGTGAATGACAAGTTTGATTCTGTTCAGGCAGATGATGTGGAAAGCAAGATT
CGAGAGATAATACCTGCAGGTTTTTGTACCGGTACTGATGATTTCATATCTTTGCTGGAA
AAAGAAGTGAATTTTAAAGCCTTTGGAACAATATTACACACTTATACCGTACACAATGAA
GACGCTGGCGAAGATATTGCATATCAGATATGTAAGGCTGATATGACCTGTCCAGGCTTC
CGGGACTACCATGAAAGACTCCAGACCTTTTTGATGTGGTTTATTGAAACCGCTAGCTTT
ATTGATGTGGACGATGAACGATGGGACTACTTTTTGGTATTTGAGAAGTATAATAAGGAC
GGAGTTACGCTTTTCGCGACCGTGGGCTACATGACAGTCTATAATTACTACGTATACCCA
GACAAAACCCGGCCACGTGTAAGCCAAATGCTGATTTTACCTCCGTTTCAAGGTGAAGGG
CATGGGGCTCAGCTTCTGGAAACCGTTCACAGATATTACCTTTCCTCTCCAACCATCTTG
GATATTACCGCTGAAGACCCTTCAGAAAACTTTGTCCGGCTCAGAGACTACGTCCTTGTT
AAGCTCTGCCAGAATCTGCCTTGTTTTTCCCCGGAACATCTTCAAAGTAGAAGCTACATA
AATACCGGATCTCCAAGATCCAAATGTATCGGGACCAGCACTGGAGCTTTAGAAAATTCT
CGTGCAAGCGATCTTCAAATCCGAAACTCGGTCAGCACTGAATCGCAGGATTTTTCCTAT
GTCTGTGTTGCAGAAAAAAAATCAAAGGGGGAGATGGCCAAGATGAGAAGATGTCTGAAA
CCAGAGGAACTGACCAACCAGATGAACCAAATAGACCTAAACACTCAGCATGAACAACTA
GAAGAAAGCTATCAGCAACTTCTTTCCGAATACAGACGGATAGTGGAACGGCTCGCTCAG
TCATAA
>g670
ATGTCCATAGACAGAGATCTTGAATCCGGCTGGGAGAGGCAGCCCGAGGCTGAGGAGAAT
GGATCTGTGTTACCAGCTTCCAGCTCTGTGCTCCGTGCCACCAACGAGCCGTCTCCCGCC
CGTGCCTCACCACCCCAACCGGACCCTCGGTACAGCCCCCTGCTATTGGACTATGACGGT
TCAGTGCTGTCCTTCCTAGGAGGGCTGGGGAAGTACCAAATCCGCCTGGTGCTGCTCACC
TGGATCCCCATGTTGTTTCTCGCTTTCAGCAGCCTCTCGGACTTCTTCTTCTTGGAGATG
CCCAATATAACGTGTAACGACAGCGGGGTAGAGGACGGCCACTGGATGCAACTCCCGGCT
GGGAATGACACAGTGGCCACCAGCGTCCTCTCTACGACGCAAGCACCCCAGCTTCCCACC
ACAGCCACGCTCGATGCCATCACTGATGCGCACAATAACATCTGCACGTGCCGCGAGAAA
GTCTTCCAAATCGGCCCTGGGCTCGTGGAGAACGTGGTTAGCAAGGTAAGAAAGCATTAT
GTCATGTATTGTTTACGCTGCTCCTATCAGGTGCCGTGCCGCTCGGTGCGCGCGTACAAC
GGGGGTCTCTAG
>g668
ACCATCCTGAGGGTGAGTGGGCTGGCGCGTTACCTCCATTCAGCCGTCCTGATCAGCGGC
ACCCTGCTGGTGTTTGGGGGGAACACTCACAACGACACTTCCCTGAGCAACGGCGCCAAG
TGCTTCTCCGCCGACTTCCTGGCCTACGACATCGAAGGTGGCAGAGGCTCTCCGAGCAGC
GGGACTCGGATAACGAAGGGGCAGCAGATGCCGATCGCAGGTGGACGGCGCGGCTGCCAG
AGAAACGCGGAGACGGAGAGCAAGGAAGTCGAAGATTTTCAGAGGTTCTCACCGGCTTCC
GGAGGTCGTTACGACATCGGCCTCCCAGCCAACGAGCTCCAAGGCGCCTGGCCGACAAGT
CGAGGTCTGACCACCTCTGCCGGGACGCCGGTGGTGTCTAGACCTTGGGTGGGCTCCAGC
GGATCCAGTGGTAATGGAGGGGGTGCTATAAACCGGTTTGCTTGTGGGGAAAGGTTCAGA
GGCTGCGCAGCGTGCGATGAATGGAAGGTTCTGCAGAAGCCCAATCTCCACCGTGACGTC
AACCGCTTCGGGCACTCGGCCGTCGTCAGCAACGGGTCCATGTATATATTTGGGGGCTTT
TCCAGCGTCCTCCTTAATGACATTTTGGTGTATAAGCCCCCGAGCTGCGAGGCTTTCCGC
GGCGAGGATCTCTGCACCAACGCCGTGCGCGGAATCAGCTGCGCATGGGACAAGGACCAC
TGCGTGTCGTGGGAGACGGCTCGTGCCAACGGCAAGTCCTTCCAAGCCCGCTGCCCCGCC
AAATCAGCCGCGTCGGACGACAGATGCTACAAGAACACGGACTGCGCCAGCTGCACGGCA
AATACCAACGGCTGCCAGTGGTGCGACGATAAGAAGTGCGTGTCGCTGAACAGCAACTGC
AGCGTGTCGGTGAAAAACTACACAAAATGCTACATCCGCAACGAGCAGATCTGCAACAAA
CTGACGAGCTGTAAGAGCTGCTCCCTAAATCTGAACTGTCAGTGGGACCAAAGGCAGCAG
GAGTGCCAAGCGCTGCCAGCTCACCTGTGCGGGGAGGGCTGGACGCACGTGGGGGACGCC
TGTCTGCGCATCAACTCGAGCCGGGACAGCTACGACAACGCCAGGGTTTACTGCCACAAC
CTGAGCGGCAGCCTGGCCTCCCTGACTACCTCCAAGGAGGTGGATTTTGTTCTGGATGAG
ATGCAGAAATACACGGTCCAGAAGCTGTCACCCTGGGTGGGTTTGCGTAAAATCAACATC
TCGTACTGGGGTTGGGAGGACATGTGCCCGTTTACCAACACCACCCTGCAGTGGCTTCCA
GGAGAGCCCAGCGACTCGGGATTCTGCGCCAACCTAGAGCGAGCCGAGGTGGCCGGACTG
AAAGCCAACCCCTGCACGGCCCTGACGGACGGCCTGGTGTGCGAGAAGCCGGTCGGGTAC
GGGGTAGGAATCGGCTCGCCCCGTTATCGTCGTCGTTATATCGGTCACGGGGGAGTCAGA
GAGGACAGAACATTTTGTGAGCCCCGCGGTTGCCGCTCTCGGTAA
>g676
TTTGACGCTGACAGGGACGAGGAGGAAGTGTTTTATGACATCAGCGTCGCGGTTGACAGT
AAGATCTTCCCTGCCAAGGAGCCCATCGCAGGACCCGGAGATCTGGACATCAGTCTCATC
GCGGACGGCGGAGAAGCCGAGGCGTCGGGGTTCCATTTTGAGGAGCAGGGCAGTTCTTAC
CGGACGTTTATGAATGATCTTAGTTCGGGATCCTTCTCCATTCCATTTATAAGAAATGTG
CTTGTTATTCCTCCCCAAGTGCATACATTTACATTTTCCTATGTGGGAGGCGGGCATCAG
AGGAGGAAAGGTGCCACAGGGGAGGAAATGAGGCATCGGGGAGAAAAAAAAGGAGGTTAC
GTGTTCTGTATGTTGCATCGCCTCCCGGAACAGCACGACTGCACGTTTGACCACATGGGC
CGCGGGCGCGAGGAGGCCATCATGAAAATGGTGAAACTGGACCGGAAAGTGGGCCGGTCC
TGCCAGCGCATCGGCGAGGGCTGCTCCTGA
>g683
ATGGATTCACCGGCCCCGCTGGGAATAATAACGCGCTTTTATATTTACGCCATCCATGGA
TATGTGTGCGAGATCCTGTTCACTGCCGCGTGCGACTTCGCAGCCAGCGGAGACTGGAAG
TTCCAGGGCATCACCAGCCTCTGGGCTCTCTTTATCTATGGTAGCGCCATGTTGGGCATT
GAACGCATGTATCTGGCTCTGCGGAGCGGCCTGGGCTTCCTTCCACGGGCTCTGCTCTAC
ACGCTCTGGGTGTACGCCTGTGAATTCACTTCCGGCTGGCTACTGAAAGGTATGGGTGCC
TGCCCATGGGACTACAGCCACTTCCATTATAACTACCATGGCCTAGTGACCCTGGAATAT
GCCCCCTTCTGGTTCATGGGCTGTGTCATTCTAGAAAAGGTGCTCATTTGGCACACGCTT
CGCTTACGACTCGACGAAAAGTGGGAGCCACAGGAAGCAGAACTAAAGAAGGACGAGTGA
>g679
AGAAGGAGTGACATCATTCCAAACATCCTATATTGTCAACAACCAAAGGCCGATCAAAAA
ACAGCTGACCAACAAAACTTGACAGTCCCTACACTGAAGGAACCGAAGGAACCGAAGGAG
CTCATTGTGCTTATTTGGGTTTGGCCTTTCGGAACCCACTTCCCATTGGATACTTGCCTC
CCGGTTCATGGGATTCCAGGTTGTAGACTGACCGTAGACAGGAATTTATACAATGTAGCT
GATGCTGTGGTCATGCATCATGTAGATATCATGTATGACAAAAAGTCATTGCCTCAGCAG
CCACGACCTCATCACCAACATTGGGTCTGGTTCAACATGGAACCTCCATTGATTATAGGA
AACTTGCATTTCCTAGATAACCTTTTCAACATGACTATGACTTTCCGCCAGGATTCCGAT
ATCTACACTCCTTATGGGAGGATTCAAGCCCTGAAAGAACCTCAAAACCTCACCATTCCG
GCCAAGTCCAAGATGGTGTCTTGGGTAGTTAGCCAGTGGTACCCAGGTGCTCCTCGTATA
GCATATTACGAGGAGCTGAAGAAACACATCCCTATCGATGTCTACGGAAAAAGAAATATG
AAGCTGAGTTGGGATGACTTCTACAGCACTATCTCCCAGTACAAGTTTTATTTGGCCTTT
GAGAACTCCATCTATAAGGACTACATCACTGAGAAGTTATGGTCCAACGCAATTGATTCC
TGGGCTGTGCCAGTTGTGTTAGGAACATCTCGGAAGAACTATGAGCGTTTTGTTCCTGCC
GAGGCCTTCATTCACGTAGACGATTTCTCCAGCCCCAAGGAACTGGCTGCCTACCTTCTT
GAGTTGGACAAGGATGACGAGAAATACAGGAGATACTTTAACTGGAGAGCCCAGTACCGC
GTGCGGCGAGAGACAGGGTGGGATAGTAGCTACTGCAAAGTCTGCAGAGCATTGAGGCAG
GCTTCTGTCTACCAGACCATCCCCAGTATAGCCAACTGGTTTCTAGACGGGAAATTCTAA
>g662
ATGGCTGCTGCTGCTGCTGCTGGCAACTACCTGTCGCTCTGCTTCGTGGCATGGGGCACC
TTGGTGGCTGCTTTTAACCTGGATACTGAGAATGTCATCAGGAAAAGTGGAGATCCTGGG
AGTTTGTTCGGATTTTCCTTAGCGCTGCACCGGCAGCTGGCACCGGAGGATAAACGACTG
TTGTTGGTCGGTGCCCCTCGGACCAAAGGCTTCCCATTGCAGAAAGCGAATGTAACTGGT
GGTTTATTTGCTTGTGATGTCACGTCTCCATCATCAACCTGCACACGGATTGTATTTGAT
GACTCAGTTGACTTAACATCAGAGAGTAAGGAGAACCAGTGGATGGGTGTCAGTGTTCAA
AGCCAAGGGCCAGGAGGCAAAGTTGTGACATGTGCCCATCGATACGAAAGAAGAAGGTTT
GTGAACTCGAACCAAGAATCACGTGATATCACAGGAAGGTGCTATGTACTCAGCCAAGAC
CTCACTATCACAGACGAAATGGATGGTGGGGAGTGGAATTTTTGCGATGGCCGACTGAGG
GGGCACGAGAAATTTGGATCTTGTCAGCAAGGTGTTGCTGCAACATTTACAAAAGATTAT
CATTATGTTGTGTTTGGCGCTCCTGGAACGTACAACTGGAAAGGAGTTGTTCGGGCAGAG
CACAAAAATAGCTCATTTGATGATCTGTTAATTTTAGAAGATGGTCCATATGAAACTGGT
GGTGAAAACAAACGTCTTGCAGAATTAGTTCCCGTTCCAGCTAACAGTTACTTAGGATTC
TCTTTGGATACCGGAAAAGGAATAATCTCACAAGACGAAATGACCTTTGTTTCGGGTGCT
CCAAGAGCTAATCACAGTGGAGCGGTGGTCCTCTTGAGCAAAAACCCTCCCTACGAAAGG
ATGCTGTCTCCAGAACATATATTTGAAGGGGAAGGTCTGGCCTCTTCTTTTGGTTACGAT
GTAGCCGTGGTTGATCTGAATAGTGATGGGTGGCAGGACATTGTTGTTGGTGCGCCTCAG
TTCTTTGATAAGAATGACAAAGAAATTGGAGGGGCTATTTATGTATATATCAACCAAATG
GGCAAATGGAATGAAGTCAAGCCAATCCGCATTGAGGGGACTAAGGATTCCATGTTCGGT
ATTTCTGTAAAGAACATTGGAGATTTGAATCAGGATGGATTCCCTGACATTGCGGTTGGA
GCCCCTTATGATGATGAATTTGGAAAAGTGTATGTGTTCCATGGAACAAAGGATGGGATA
AATAGAAAACCAGCTCAGGTTCTTGAGGGAAGAAGCACAAATACAAAGTCCTTTGGGTAT
TCCATTGCCGGAAATATGGATTTGGACAAAAATACCTATCCAGATCTTGCTATTGGATCC
CTGTCAGATTCTGTAAATGTATTCAGATCACGTCCGGTTATCAACCTGAAGAAGACCATT
AAAGTCACTCCAGATAAGATAGACTTTAACAAGAGGAACTGTGACGCTCCCAGTGGAATC
TGTTTGGATGTTGAAGCTTGTTTTGAATATACAGCAAAATCCAAAGATTACAATCCTGTT
CTGACTCTCAGCTACACATTTGAAGTTGAAAGTGAACGACAAAAGTTAGCTTTGCCATCA
AGGGTTCAGTTCAAGAATCTTCCCTTTGAAAATCAGATGACAAAAACTATTGTCCTCCAG
GGGCAAAATCAACAGAAGTGTGTCAAAACATCACTCCAGTTACAGGAACCCATTCGAGAC
AAACTCCGCCAGATCCCTATTTCTGTATCTGCAGAAATTCAATCTGCTAGTTTATCTAGG
CAACGAAGTGGCCAGCTTCCACAACTGGTTCCAATTCTGAATCAAAATGAGCCAAAAACC
ACTACTGCCAATGTCCAGTTTCTAAAAGAGGGATGTGGAGAAGACAACGTATGTAACAGC
AACATGAGAATGTCCTACAAGTTCTGTACCAGAGATGGACCTGAAACCTTTACTGAATTA
CCAAAAGAAAATGGAGTCCCGGTCTTGTCTCTCAAAGATCAGAAAGATATTGCTGTAGAA
ATAACAGTTACCAATAACCCATCAGACCCGACAAACCCTAAAAAGGATGGTGATGATGCC
CATGAAGCCAGACTTACTGCAGATTTACCAAATGCCTTGTCTTACTCATCCATGCGTGAT
CTGTCTCACAGTCCTGAAAAACAATTTATTTGTACATCAAATCAAAACGGGTCCAAAGTA
GGATGCGAACTGGGAAATCCATTTAAAAGAAATGCTAATATTACATTTTATCTTATTTTG
AGCACAAACGAGATATCGGCGAACACTACTGACCTGGAAGTTCTTCTCAATTTGGAAACA
ACAAGCTCCCAAGCCAACCTTGCTCCAGTGGTAGCCAAAGCTCGGGTGGTTATTGAACTA
CTTCTTTCGGTCTCAGGAGTTGCCAAACCATCTCAGGTGTACTTTGGGGGAAATATTGTT
GGAGAAAGTGCAATGAAATCAGAAGATGATATTGGAAATTTAATTGAATTTGAGTTCAGA
ATAACTAATTTTGGACGACCTCTTAAAGCACTTGGCACTGCATTTTTGGATCTTGAGTGG
CCAAAGGAAATTACCAACGGGAAGTGGCTGCTGTACTTGATGAAAATAGACTCTAAAGGG
TTGGATAAAGTGACTTGTCGGCCTGCTGGTGAAATCAATAAATTGAAACTTTTGGAGTCT
GGAAAGACTAGAAGCAGACGCGAGATTAGTGAAAAGCAGAGTGGAGATGAGAAAACATTT
TCCCTCTTTTCTGAAAGAAAGTACCTGACATTGGAATATGCAAAGATGAATTACCTTGAC
ATCCTAGTGAAAGCATCGATTGCCATAGACACAACTGCTCAAAACATTAAAATGTCAAAA
GAGGGGTACCAGGTGCGTCTGACTGTTTTCCCCGAGAAGACAGTAGCTCAGTACACAGGA
GTGCCTTGGTGGATTATATTGGTTGCCATTCTCGCTGGGATCTTGATGCTGGCACTTTTG
GTCTTTATACTATGGAAATGTGGATTCTTTAAACGGTCTAGGTACGATGACAGTGTCCCA
AGATACCACGCTGTACGAATTCCCAAAGAAGAACGGCAGGTCAAAGATGGCAAACCAAAC
AAAAGCAATGAAAAAAAACAATGGGTCACAAAGTGGAATGAAAATGAAAGTTATTCCTAA
>g652
GAAATAAAGTGCGAAACTGAAAAACAAAGCACTCCCCAAGGAGAAGCAAAGGCCGGTTCT
GGCACCCTTCCTCCCGTGAAGTCAAAGGCCAGTTTTATTGAAGCCGACAAGTACTTTTTA
CCGTTTGAGCTGGCATGTCAGTCCAAGTGCCCCCGAATTGTCAGTACGTCCCTAGACTGT
TTGCAGAAACTTATAGCTTATGGGCACTTAACTGGAAATGCCCCGGATAACACAACACCA
GGGAAGAAGTTAATCGATAGAATTATAGAAACAATATGTGGCTGTTTTCAAGGACCGCAG
ACAGATGAAGACGTCCAGTTACAGATAATAAAGGCGCTGCTCACCGCGGTTACATCTCAG
CACATTGAAATCCATGAAGGAACCGTTCTTCAAGCTGTTAGAACATGCTACAATATCTAC
CTAGCCAGCAAGAACCTCGTCAACCAGACCACGGCCAAGGCTACCCTGACACAAATGCTC
AATGTAATATTTGCACGCATGGAAAACCAAGCACTCCAAGAAGCCAAACATATGGAGAAG
GAACGACATAAACATCAGCACCATTTACAGCACTCTCCTGTAAGTCACCACGATCTGGAA
CTGCCTCCAATAAGACACATTTTGGAACAAACGGACCAGTTGGCTCGAGAGCATGAAGCG
GATCTTGAGCGACATCCAAACTATATGGAAAATAATCTTCAGGAAGAAGTTGAGCCGGAA
AATGGATATGACGCTCGGAACGCAGATAATGAGCATACAGAAGCCGACCAGTCTACACCG
GCAGAGAATCACTCAAAGACGGATCTGGGAATTGGAGAAGAAGGGAGCCATGATTGTGAA
GATAATGCACAGAATATTATCCAGAGTATAATACAGGAGATAGTGAGCTCCGTAGTTGGA
GATAAGGAGAACGTCATCAACGAATGTCCGGCAAGAACATCAGAGGATGGAAATGATGGG
GAGACAATCCATGCTAATGGGATACCAGGCACACCGATATCTATGGCATATACTCCTTCT
CTGCCTGATGATAGATTGTCAGTCTCTTCTAATGACACTCAGGCAAGACATCAAGAAGGT
GCAATCATTTCAGGGCCTTCTCCTGGTGCTAAGTTCTCCCATATCTTACAAAAGGATGCC
TTCCTGGTCTTCAGGTCACTGTGTAAGTTGTCTATGAAGCCGCTGTCTGATGGACCCCCT
GACCCAAAGTCCCATGAATTAAGGTCAAAGGTACTCTCCCTCCAGCTCCTTCTGTCCATT
CTGCAGAATGCGGGGCCTATCTTCAAAACCAATGAGATGTTTATCAATGCCATCAAGCAG
TACCTCTGTGTGGCCCTGTCCAAAAACGGGGTCTCATCCGTTCCGGAGGTCTTTGAGCTT
TCTCTTTCCATTTTCTTGACGTTATTATCAAACTTCAAGTTGCACTTAAAGATGCAGATT
GAGGTGTTCTTCAAAGAAATCTTCCTTTACATATTGGAAACCTCCACCAGCTCGTTCGAT
CACAAATGGATGGTTATTCAGACACTGACCAGAATTTGCGCAGATGCACAAAGCGTGGTG
GATATTTATGTCAATTATGACTGTGACTTGAATGCCGCCAACATCTTTGAAAGGCTGGTG
AACGATCTCTCGAAGATTGCTCAAGGACGAGGCAGCCAGGAACTTGGCATGTCAAACATG
CAGGAATTAAGTCTTAGGAAGAAGGGCTTGGAGTGTCTGGTGTCCATATTGAAATGCATG
GTGGAATGGAGCAAAGATCTTTATGTGAATCCCAACTCCCAGTCGACCCTCGGGCAAGAA
AGGCCAGCTGAACAGGATACCCATGAAAGCAAACATCCAGAAACCATCAACAGATATGGC
AGCCTGAACTCGCTGGATTCAACGGCGTCATCGGGTATCGGCAGCTACAGCACACAGATG
TCTGGAACGGACAATCCAGAGCAATTTGAAGTCTTGAAACAGCAAAAAGAGATCATAGAG
CAAGGAATTGATCTGTTTAATAAGAAACCAAAAAGAGGGATCCAGTACCTTCAGGAGCAA
GGGATGCTTGGAACGAGCCCAGACGATATTGCACAGTTCCTGCACCAAGAGGACAGGCTG
GACTCGACTCAGGTTGGAGAATTCCTTGGAGACAATGAGAAGTTTAACAAGGAAGTCATG
TACGCGTACGTGGACCAGCATGACTTTTCCGGAAAGGACTTTGTGTCGGCGCTTCGCCTG
TTTCTGGAAGGATTTCGCCTTCCAGGTGAAGCCCAGAAAATTGATCGCTTAATGGAGAAA
TTTGCTGCTCGCTACCTTGAGTGCAATCAAGGGCAAACGTTATTCGCCAGTGCAGACACT
GCGTATGTGTTGGCCTATTCAATTATCATGTTGACTACAGATCTGCACAGTCCTCAGGTC
AAAAACAAAATGACCAAAGAACAGTACATCAAAATGAATCGGGGTATTAATGACAGCAAG
GACCTTCCTGAAGAGTATCTGTCTGCCATCTACAATGAAATAGCCGGGAAGAAAATCTCC
ATGAAAGAAACAAAAGAGCTTGCAATCACAACAAAATCATCCAAGCCAAGTGTGGCCAGT
GAAAAGCAAAGAAGGTTACTGTATAACCTAGAGATGGAGCAGATGGCAAAGACGGCAAAA
GCCCTCATGGAAGCTGTGAGCCACGTGCAAGCCCCTTTCACTAGCGCTACCCATCTAGAA
CACGTCAGACCCATGTTCAAGTTGGCGTGGACACCGTTCCTGGCCGCATTTAGTGTTGGT
TTGCAAGACTGTGATGACACGGAAGTAGCATCGCTCTGCTTGGAGGGTATCCGCTGCGCC
ATCAGGATTGCGTGTATCTTCACTATTCAGCTGGAAAGAGATGCCTATGTCCAGGCCCTC
GCAAGGTTTACGTTGCTCACCGTGAGTTCTGGGATTACCGAAATGAAGCAGAAGAACATA
GACACCATCAAAACCCTCATTACTGTGGCTCACACCGATGGCAACTACTTGGGATCTTCA
TGGCATGAGATCCTGAAGTGCATCAGTCAGCTGGAGCTGGCGCAGTTAATAGGCACCGGA
GTGAAGCCGCGTTACATATCTGGGACGGTGCGGAACAGAGAAGGTTACTTCACCGGAACC
AAGGACCAAACGTCTGATGAATTTGTCAGTCTCGGACTGGTGGATTTTGTTCGTTGGCTG
TGTGCGGTTTCAATGGATGAACTTTTGTCCCCAAATCACCCCCGTATGTTCAGCTTGCAG
AAGATTGTTGAAATATCCTATTACAACATGGGCCGTATCAGACTGCAGTGGTCTAGAATA
TGGGAAGTTATAGGAGACCATTTTAATAAGGTTGGTTGCAATCCCAATGAAGATGTGGCC
ATCTTTGCCGTAGATTCCTTAAGGCAGCTCTCGATGAAGTTTTTAGAAAAGGGAGAGCTT
GCAAACTTCCGTTTCCAGAAGGACTTCTTAAGGCCGTTTGAACATATAATGAAGAGAAAT
AGGTCTCCCACCATTAGAGACATGGTGGTACGATGCATCGCTCAGATGGTAAATTCTCAA
GCGGCAAATATTCGCTCTGGCTGGAAGAACATCTTCTCGGTGTTTCACTTGGCTGCGTCG
GATCAGGATGAGAGTATAGTGGAGCTTGCGTTCCAGACCACTGGTCACATAGTCACACTG
GTGTTTGAGAAGCATTTTCCCGCCACCATCGATTCCTTCCAGGATGCTGTCAAGTGCCTG
TCAGAGTTTGCTTGTAACGCAGCTTTTCCAGACACCAGTATGGAAGCCATACGCCTGATA
CGCCATTGTGCGAAATATGTCTCTGACAGGCCCCAGGCCTTTAAGGAGTACACTAGCGAC
GATATGAATGTCGCCCCCGAGGATCGCGTGTGGGTGAGAGGATGGTTCCCCATTCTGTTT
GAGCTGTCCTGCATCATTAACAGATGCAAATTAGATGTAAGAACCAGGGGTCTGACCGTT
ATGTTTGAAGTGATGAAGACCTATGGCCACACGTTTGAGAAGCACTGGTGGCAGGATTTG
TTCCGAATCGTCTTCAGGATCTTTGATAACATGAAACTGCCGGAGCAGCAGACTGAGAAA
GCGGAATGGATGACCACCACGTGTAACCACGCTCTCTATGCAATCTGCGACGTGTTCACC
CAGTACTTCGAGGTGCTCAGTGATGTATTGCTGGATGATATTTTTGCCCAGCTGTATTGG
TGTGTACAGCAAGACAACGAACAGCTCGCCCGTTCCGGCACCAACTGCTTAGAAAATGTT
GTAATACTAAACGGAGAGAAATTTACGCTGGAAATCTGGGACAAAACCGGCAACTGTATG
CTTGATATCTTCAAAACAACGATCCCTCACGCGTTATTGACCTGGAAAGCTGCAGCGGGA
GATATTGATCCAAGCTCACAGTCTGAAATGGGAGAAAAACAACTGGATTCCGTGTCTCAG
AAATCTGTGGATATTCATGAATCTATCCAGCCGCGGGCGGCCGATGGCAGACGCAGTACC
CAGGCGGTGATAACCAGCTACGAGGAGATGCCGTTACACCGAGCTGGCACCAAAGTTCCT
GACCAGAAGCTCTTTGCCGCCTTGTTGATTAAGTGTGTGGTGCAGCTGGAGCTCATACAG
ACTATCGACAACATTGTGTTCTTTCCAGCCACTAGTAGGAAAGAGGATGCTGAGAACCTC
GCCGCTGCACAGAGAGACGCTGTTCATTTTGATGTTCACGTCGATACCCAAGACCAAGGC
ATGTATAGATTTCTCACCTCCCAGCAACTCTTCAAACTCCTGGACTGCCTGCTGGAATCT
CACAGATTTGCCAAAGCCTTTAATTCCAATAATGAGCAGCGAACCGCTCTCTGGAAGGCA
GGTTTCAAGGGCAAATCCAAACCCAACCTCCTCAAACAAGAGACCAGCAGCCTCGCGTGC
GGCTTGCGAATTCTGTTCCGCATGTACATGGATGAAAGCCGGAGAAGTGCGTGGGATGAG
GTCCAGCAACGACTGCTAAATGTTTGTAGTGAGGCGCTGAGTTATTTCCTGACGCTGACA
TCAGAAAGTCACCGAGAAGCCTGGACTAATCTGCTACTGCTGTTCCTAACCAAGGTCTTG
AAGATTAGCGATGAACGGGTAGGTCTGCTAACAGCCGGGTCCTGTTTGTAA
>g684
ATGCCTTCCAGTCTGCTGAGTCCTTTCCCAGAGCTGGACACAAACTTTTCCAAGGACATT
TTGAGTTTAAAGCTTAATCCGAGCAGGAATCAAGACCCTTCCTTCTCCTCCTGCCCACTC
AACCTCAACAAGAATAAGAAAAGCTATGAGCAGCTGGTGGACTTCCCTACTTGGCCAACA
GAGAACCTGAAGGTGGAGATGTCTGCTACAAATCTCTTGCGGCACATCCCGTTCCAGGCA
GAGCGCTCTGTTAGTCTGATCGAAGATGGCAGAAAGCCACTGGAGGTCTCCCGACAACAG
TCCACCCGCTATAAGACTGAACTGTGCCGCACGTTTCATGAGAGCGGATCCTGCAAATAT
GGGTCCAAATGCCAGTTTGCACACGGAATGGGGGAGCTTCGTGGGCTGAACCGGCACCCC
AAATACAAGACGGAGCTATGCAGAACCTATCACACAATTGGATTTTGCCCTTACGGATCC
CGCTGCCATTTCATCCACAACGCCGAGGAGCAGAGGTTCGGTGGTAGGACTCGTACGCAG
TGCCCTCACCTTTTGCGACAAAGTGTGAGCTGTTCTGGAATACCTTCGTCCTCATCATCC
TCAAACTCCTTGTTCTCGACCTCTGTATCTTCTTTATCCCCCTTCTCCCCTTCCAGTCCA
ACCTCACCCAACTTCTCTCCATCTAACCCCCTTGGCGGGATTATGCCTTCCTCCCCTGCC
CTGACACTGAGCATGTCCTCCCTGTTCCGCGCAGTTTCCCCTCCTTCAGAGGAACCAGCT
GTTGGCGAGGTTCTGCTCCATCTGCCATCCAGCCCAACCATAAAACCTGAGGCTGGGAAA
ACAAGGGACTGCGCAGAGACCGTCCAATGTAACGCCCAAGAAGCCAGGCGCCTCCCCATA
TTCAGTAAGCTGTCATTCTGA
>g696
ATGGAATACAAGGTGTTCTGCTTATTCGCCATCGCCCTGATCGTGGGCTCCTTCAGCTCA
GCCAATGGACAGGCAGCTCTCACTCAGGCCCAGTGCTCTGTAGAACCGGTAGCGAGAGTG
AACTGCGGACCACCAGGAATTTCCTCCTCCGAGTGCTTCAACAAGGGCTGCTGCTACGAC
AACACTCTGTCAGACGCCATCTGGTGCTTCTACGCTCGGCCAGACGATGGTAATTTCCAT
TAA
>g685
ATTTATGAGCGGTATGGGGACGATTCTTGCCAGTACATTGCATACCCAGAGTTCCTGCAG
AACATGGGCATCGTCTTGTCGCACGCCGGGGACATTAATGGCGTCAGCACCAATATCTTC
AATGAGAGTGAGTGCAGAGAGGAGTTCAGACAGACGGACCTCTCCAACAGAATGAGGGAG
ATTGATCACCAAGCCAGTCATCTGATCAGGAAGATCACCGTGGATGGTGTCATTGAGAAG
CTGAAGGAGTCTATGAATATTCAAGAATTTGCCACCAAAGACAGTTTCCTCGCCTGCAAA
AAGCAGAAAAATGGAAAAGTGACTAAGGCAGATTTCAGGAAGGTTCTGGAAGATCACAGA
ATCCATCTAGACGACGACCAGTTTAACGAACTCGCCGAGAAACTGGGATTCACCGGGGAA
GGACTCGGCTACTTAGACTTCGTGTCGTTATTCCAAGTCCCTACAGGCGAGGGACCGGGG
GACGTGTTACAGAACAGCCCAAATCACCGCGTGAACCGGACGAGGTTTCACTACACCACG
GCGGAGGAATGTCTGAGCCAATTGGCCGAGAAACTCCACGAATGTTACGAGGACTCGTAT
GCTGCCTTTTATAAAATAGACGGTAACCGGGACGGCATCGTTTCCATGCACGACCTCCGC
CGCCTGCTCGACAGCTTCCTGTTCATCCTGACGCAGAAGGAGTTCGAGAGGCTGCTGGGG
CTTCTCGGGCTGAATCTCAATTCAACTTTAAACTACGTGGAATTCTTAAAGTTGGTGCAA
AGGCAGGAGAAAGACGACTGCCCCCCGTGGCTGAACTCATTCTACAGGCCGAAGCAGACC
TCGGACTGCGCGGATCTGGCGTGTGAACAGGCTCATTACTACCTCGTCACGAAAGCGCAG
GCCAGGTGGCACGACTTAGCCAAGACTTTTTGCGAGTTCGACAGCGAGGGGAACGGCGTC
ATACAGAAAAAAGATTTACGGAACGTCTTGTTTCGTTTTTCGCTTCCAATTACAGCGAAA
GAGTTTGAAAAGCTGTGGAGCAGGTACGACCCGGAGGGTAAAGGACACCTCAGCCACGCG
GAGTTCCTCCAGAAGCTGGGCGTTCATTTCGCTCCGGCGGACGGCGGTCCGAGCCAACGC
ATCGCCGACGACAACCGGGAATCTCTGCTGAAGCATTACGGCGGGCAGCGAAAAATGACA
GAGGAGCTGGAGGCCTTCCACAGGCGGCAAACCAAAGCGCTGGACCTCGGGGGCATCGAG
CAGCAGATCAAGGATAAATTCAGGGAATATTACCAGGATTTCGCCGCGGCTTTCGCTAAA
ATGGACAAAAATAAAGATGGCTTCATTACCGTCCAGGATTTCCGACGCACGCTGGAGGAG
ATGAACTTTTACCTGGACGACGATCAGTTCGATGACCTCCTCTGCAGGTTGAGGATCAGA
GTCCGGGACCGGAAGTTCTCCTACTTCGATTTCCTCAGAGTCGTGGACGACGGACGGGCT
TCAAAGTACGGCCAGAAACCCAGCGGCCCCCCGGACCGCTTCCTCCACCTCAGCCCCCCA
AAGGCGCTCGGGAAGCTGAGAGAAGCCATAGCGGCTTCGTACGACGAGCTGTACAAGGCG
TTCTCGGCGGTTGATGCGGACGCCGCGGGGACAGTGAAGCCCCCCGAACTGCGCAGGATC
CTTGACAGCTTCTGTTTTAAGCTCACGGACGAGCAATTCGAGCGTCTCCTGCGGGAAGCG
ACTCTGCGGGCCGATCACACCATAGACTGGAGAGCCTTCCTCCGCAACCCCCCCGCGCCG
GCCGCGCAGTCGGCCTCCAGTTGGGTCGAAAAAGTGCAGAAAGCCACGCGGCCGAAGTCC
AGCCAGAAACTAACGACGAAGGACATCCTGACGCGCATACAGGAGGTAGTCGGGACACGA
TCCGACGCCATCCTGCAGGAGTTTGCGGAGCGGGATTACGCGAACATTCACGTCATTTCC
AAAGAGGATTTCAGAGAAATCTTCAGCAGGAACTTTCTGCTTCTGACGGACGAGCAG
>g698
ATGGTTGCCAATCTTACACACAGCTCAAGCTCTGGAAGGCACGACAGAGTGATCAATGCA
GGAAAAAGTCAATATAATGAGGATCAGGCTTGCTGTGAATATGTAATTGTGCAAAGTAGA
GATGAAGAATTCAATGACAATTGCGAAGAATCCGTGCAGCTTGAGCAGAATATAAACAAG
AGGCAACAATCTTTGGATAAGGTCGACAGCAGAATTCGTTTCTACTACTGGGGGCTCTTT
GACGGTCATGCAGGTTGTGGATGTGCTTCATTCGCATCAAGGTTTCTCCACCATCACATT
TGTGACCAGCTGAGGGACTTGGTGTCTATCTTGCAGCAGCCCGTCCATACGGCCGCTCCA
CTCTGTCTTGTGCAGGAAACAACAACCGAGAATGTGGTGGGCATTCCGACTCATGAGAAA
ATGGAGCCACCCTTGAAGGCCACAGTTCGCTTTCATCTTGAAAAACAAGTATTTCCTGAG
AGTCTTGTCATAGGTGCACTTGAAAATGCCTTCAAGGAGATGGCGAGTATATGA
>g702
ATGCCTGCCAGGTTTCTGCACGTGATGGCAGCGATTCGGAAGAAGTTGGTTATTGTCGGA
GATGGTGCGTGTGGAAAGACCTGTCTACTCATTGTATTCAGCAAGGATCAATTCCCAGAA
GTCTATGTCCCAACCGTCTTTGAAAACTACATCGCAGACATTGAAGTAGATGGAAAACAG
GTGGAACTGGCTCTGTGGGACACGGCCGGGCAGGAGGATTATGACAGACTGCGCCCTCTC
TCCTACCCCGACACAGACGTGATCCTGATGTGCTTCTCCATTGACAGCCCAGATAGTTTA
GAGAACATTCCGGAGAAATGGACCCCAGAAGTGAAGCATTTCTGCCCTAATGTTCCCATC
ATCCTAGTTGGTAACAAGAAGGATTTGAGAAATGATGAGCATACACGGAGGGAACTGACA
AAGATGAAGCAGGAGCCAGTTAAACCAGAAGATGGAAGAGAAATGGCCAACAGGATCAAT
GCCTTTGGATATCTGGAATGTTCTGCCAAAACAAAAGACGGAGTGCGGGAAGTGTTTGAA
ATGGCCACACGGGCCGCCTTACAAGTCCGAAAACACAGGAAGAAGCAGCGTTGCACTGTC
CTTTAA
>g700
ATGGCTGACTACGAGGATCGGGTGTCTGATGAGGAGAAGCGTGTCCTGGTGGGCAGAACC
GGTCGCCGACCGTACCGGCAGCCAGCAGTGTCCACCCCGTCAGATGCGAGACTGACGGCA
TGTTATGGCTGCTGCCCATCGGGGCAAGACAAAGCCACCATGCAGGAAGTGCGCATTGCG
GCAAAATTCATCACCCATGCGCCCCCAGGAGAATTCAACGAAGTCTTTAATGACGTCCGG
CTACTCCTTAACAATGACAACCTGCTCAGGGAGGGCGCAGCACATGCATTTGCCCAGTAC
AACATGGATCAATTCACTCCTGTCAAGATCGAAGGTTATGATGACCCCATTCTCATCACC
GAGCATGGAGACCTTGGCAATGGCAGATTCCTAGATCCACGAAATAGGATTTCTTTTAAG
TTTGACCACCTGAGGAAAGAAGGCAGCGAGCCTCACCCAGATGACGGGGACACAAGCTTA
AAGTCTTGGAGAGATGCCTGCGACACAGCACTGAGAGCTTATGTGAAAGATCACTATTCA
AACGGCATTTGTACTGTCTATGGGAAGACAATAGATGGACAGCAAACCATAATAGCGTGC
ATCGAAAGCCACCAATTTCAACCGAAGAACTTTTGGAACGGCCGTTGGCGGTCTGAATGG
AAATTCACTGTGTCGCAGTCTACTGCTCAGTTGGTTGGAGTGCTCAAAATTCAGGTTCAT
TACTACGAAGATGGCAATGTTCAGCTTGTCAGCCACAAAGATGTGCAGGAATCCATAACA
ATTGCAGGAGAAGCCCAAACTGCCAAGGAGTTTGTAAGAATTATAGAACAAGCCGAAAAT
GAGTACCAGACTGCCATAAGCGAGAACTATCAGACCATGTCAGACACCACATTCAAAGCC
TTACGCCGGCAGCTACCTGTAACCCGCACCAAGATCGACTGGAACAAAATCCTCAGCTAC
AAGATTGGCAAAGAGATGCAGAATGCTTGA
>g699
ATGTGGACCGTTCAACAGCTGTTCCTGGGCATCCTGGTTTGCCTGTTCATCTTCAAATAT
CTAAGAATGAAATGGGAAGCTAGAAGACTACCCCCTGGACCTTCCCCACTCCCTCTTATT
GGGAACCTGTGGACAATAAACTTCAGCCTCAATCCAGACACTCTGGGCAAGATAGCAAAG
CATTATGGGAACATTTTCACAATATGGCTAGGACACACTCCCATGGTGGTACTGCATGGC
TGCCAAGCAGTGAAAAACGCTCTAGTTACTCACTCTGAAGAGGTGTCTGGACGTCCTACA
GACAGCTTTCTAAGGGACTTTTCAAATGGAAAAGGTATCGTATCATCCAATGGACACAAC
TGGAAACAGCAAAGACGCTTTGGATTAATGACATTAAGAAACCTGGGGCTTGGAAAACGT
GGGCTTGAATCACGAATACAGGAGGAAGCTCAATGTCTGGTGGATTCCATTAGAGCCACG
AATGGTAAACCAATTGATGCCTCCTACATAATTACATATGCTGTTGCAAATGTGATTTCC
GCTGTTGCCTTTGGTCATCGTTTCTCCTTTGATGATGCCACTTTCCAGAAATTAGTTGCA
TGCACCAATTACTTGACTGAAGGGCTGGCCTCGAAATGGGCACGACTCTATGATGCATTT
CCATGGCTCATGCGACATGTTCCTGGTCCCCACCAGAAAATCTTTGAAACTAAGGAATAT
ATCAACAATTTTGTAAGAAACGAGATCAGAAATCATCAGGAAAATGGAAAACCAGAAGAA
CCCAGTGATGTGATTGAATACTATCTGGATAAGATAAGAAAAACAAAGGGTGAACCTGAC
ACTACGTTTGATGAGGCCAACATGATTCAGGTGGTTGTTGAATTGTTTTTAGCTGGGACT
GAAACTACAGTCACCACCCTCAAGTGGGCACTCTTATTCATGTTGGTTCACCCTGATATA
CAATTGAAAATACAGAAGGAGTTGGATGCTGTTCTTGAAGGGCCCACAGTGTATTACGAG
GACAGGAAGAAGCTTCCTTACACTAATGCAGTGATTCATGAAGTTCAACGCTTTGGAAGC
ATTGCGTCTGTGGGCATTGCACGGACCAATATAAATGACATGACACTCAATGGATATTCT
CTGAAGAAGGATACCATGATTCTGGCTAATCTTGACTCTGTGCTGCATGATCCTCAATAT
TGGGAAAACCCATATAAGTTCAACCCCAATCACTTCTTGGATATAGATGGGAACTTCTCA
CCCAATGAGGCTTTCTTGCCATTCTCTGCTGGACATCGAGTATGCTTGGGGGAACAGCTG
GCTCGATTCGAGCTCTTTATCTTTTTCACCATGTTGGTAAAGTCATTTAACTTCCATTTG
CCAGAAGGAGTGTCAGCGGTCAACACAAATTATATTGCAAATATAACACTGAAGCCTCAC
CCATACAAGATCTGTGCTGTACCACGTTAG
>g708
ATGGAGCTCCTGACTCTGCTCCTCGGACTCCTGGTCTCCGCCGTCCTCTGTTTCTACACC
TGGAGCATCATGTACCGGGCACGGAACCTGCCCCCCGGACCTACCCCGCTGCCCGTCCTG
GGGAACCTGCTCCAGCTGAAGACGGGGCAGTTGGTGGACTCCCTCCAGCAGATGCACCGG
AAGTACGGAGACGTCTACACGCTGTACCTCGGACCCCGCAGGGTGGTGGTGCTCTGCGGC
TACGACGCCGTAAAGGAAGCTCTGGTGGACCAAGGAGAAGATTTCGGGGCTCGGGGCCTC
CTGCCGGTCGTTGAATTATATTCTCAGGGTCACGGTAATCAGGCTATTGATTCATTATCG
ATTATCCGGCACGGGTCCTTCTTTCCCCAAAGCCTCGAGATTTCTGATCTCCTTGAGGCA
CTCAACAAGTTCCTAATTCAAAATTATGTTCGGCCGTCCCTGGTGGCTCAGCATACGCCT
ATGGTCACCTACTGTCCAGAGATCATCATAGAGAGGAACCTGAGACACCAAAGACAACTG
AACCTGTAG
>g704
ATGTTTAGCATTCATCCTACAAATGGAGAAATTACAACAAATCAAAAATTGGACTTTGAA
GTAGCAAGAATTTATGAAATACCAATACAAGCAAAGGACAGCGGTGGTCTTGTGGCCCAG
TCTAAAGTATTAATTGAAGTAACAGATGAAAATGACAATGCTCCTGAAATATCCATTACC
TCATTATCTGCGCTTATTCCTGAAGATTCAGCATCCGGCACAATGATAGCGCTAATTGAG
GTCCATGATCAAGATTCGGGTGAAAATGGAGATGTTGAATGCTATATCGTTGACAAAGCA
CCATTTAAGTTAATTTCCTCTAATCGATATTATAGAATTGTTACAACAAATACCTTGGAC
AGAGAGAAAATCTCAAGTTACAACATCACAGTTTTGGCAACTGACAGAGGATCTCCTCCA
CTCTCCACTAACAAAACCATCAGATTGGATATATCAGACGTTAATGACAACCCACCGATA
TTTTTCAAAAAAACATATCATGCTTATGTTCAAGAAAATAATTTACCAGGATCATCTATT
TATACTATACAAGCTTCAGATACTGATAGCGGAGATAATGCTAAAATCATTTATTCAATT
TCCAGCACAAATACAGAAGATCTTCCCGTGTCATCTTATCTTTCCATTAATATAGAAACT
GGAGTGGTCTATGCTCAGCGGTCATTTGATTATGAGCAACACAAGGAATTTATAATCCAA
GTATCAGCAAAAGACTGTGGATCTCCATCTCTTAGTAGCAATGCAACATTGATTATCCAT
ATTATGGATCAGAATGATAATGCACCAAAAATACTGTATCCATCACCAGATAATGGTGGT
TCACCTTTATTTGAGATGGTTCCTTTTTCTTCAGAACAGGGTTCATTAATAACTAAGGTG
GTTGCAGTAGATACTGACTCGGGACATAATGCTTGGCTCTCTTATCATTTCATACATGCG
TCAGAACCTCTTCCCTTCAGCATTAGTCAACAAACAGGTGAGATCAGGATATCACGGGCT
TTTCAAGAGAAGGATATATTGAGGCATAAGGTGGTGGTTCTGGTGAAGGACAATGGATTG
CCCTCTCTGTCTGCAACCGTTACCTTAAGTTTCATTGTTGCAGATAATTTTCAGCAGGCG
TCTCCTAAACTCAACAATCAACTCACTGATGAAGATTCACCATCTAATTTGCAAATGTAT
CTCGTGATTGCCCTAGCACTGATTACCTTTTTGTTCATTTTAAGTGTTATGCTGGTGATC
ATTTCAAAATGTAAAGAATCAAAATCCTCTACAACCTTTGGATCACTTAGTACAAATTTA
TATTCTTCAGTTGATCCCAGGATGCTTTCCCAGTATAGTAATGGGACTTTGCCTCTGCCG
TACTCATACAATGTTTGTGTTGCTTTGGATTCCACTGAAAGTGATTTTACTTTCTTGAAA
CCAAACGAAACGGTTCCTGTGAATAATCTTATTGATGCTGATGATTCGGGACTCGGAAAA
GAAAGTTTAAAAGACAGTTTAAACCATCAG
>g701
ATGGTAAGCGTGAAGGTCTTCTACCTTCACGAGTATTTCTTATGTTTTGGTGATGATCGG
AGGAAACCAAATTTTTCAGGCGCAGTTTATGGCCTTCGGCTTGGCAAGAAGGTTTTGGTA
ACTTCTAACTCTATTACTTTTAACCAGCTTGTGACAAAACCTGTGTTACTTACTGATCAA
TATGTGGCCGAGAGGAGAGATCGAAAACAAGAATTCCTATCGGTGCCGCTTTCTGGTAAT
GGCGTCAACTGTAGTAAAGGACAGGCTAGAAAGATAATTCGGTGGATGAAGCAAAACAGG
TCCAAATTCATTGGTGACAATGTTGAGATTGCCATAGACTCGGATTATGACCTGAATGAA
GGGAAAATACGTATTAAATTGGCACCAAATGACCCTCAAACATTTCCAATCCGCATTAAG
AATACTTCTCATAACTCGGTGACTCTTGTTCAGTATAAAGTGTTGCGTCGAATGAAGGTC
TTCTCATTCACAGATGATTTCAGTGTGTCCAACTCGCTAAATTATGAATTAGAACGAAAG
ATTCCACTAGGAGAGTCCACTCCTCCTAACCATCTGAGGAACAGCATCCGTGCAGGAGTG
TTCTCCAAAACAGGACCACGTACAGTGTTCCCAGCAGATGCTCAGGACAGGAATCTCCTA
TCTAGTGCCCTGAACTTCAGCAACTATGATAAGCGGTTCAGTTTGCTGCTACACCTCGAG
GAGATACAAATGGAGATAGATATCAGAAAATATGATAAAACAGGGGAGCAAATGGAATGT
GATCCAAGGAACAAACGGCTTCTGCTTCTTCATGTACCTGGTGTTGCAGAGAGCAGGCCT
TCGGTATTACGGGGAGACCACCTTTTTGTTTGCCTTTCTGACGAGCGCACAAATCCCGGC
GCTATCAACTACAAGGGCTACGTGCATGGAGTGGAACTGGAGAAAGTTAGACTGGGGTTC
TCCGACAACCTTTTAAGAAGATTTGTAACAGGCTTAAAATTTGATGTCATGTTTACGTTT
AATCGACTACCACTAAAAGTTCAGCACAGAGCTGTCAGCCTGGCTAAATCGTCCAACATT
GAGCAATTCCTGTTTCCAACATCTTCCTATGGGCAAGAAATCACCAACACAGAAAGGCTA
ACCCTTTATGACCGAAGTCTTGAGACCAACAAAGAACAGTACGATGCAGTAAAGCAGATT
GTGGGTGGTTTATCTAGGCCTGCTCCTTACCTCATCTTTGGCCCACCAGGAACTGGAAAA
ACGGTCACCTTGGTTGAAGCGATCAAACAGGTTTTAAAATGCATTCCTACGTCCCACGTT
CTGGCATGTGCCCCTTCTAACAGCGCAGCCGACCTCATCTGCCAGCGTCTGATGAAACAC
GTGGACAAGAAGGACATTTACAGAATTTTAGCCAGCAGCAGAGAATTCCGCAACGTGCCA
GAGGATATCAAGCCATGCTGTAACTGGGACAATGGACTAGGGTGTTATGTGTACCCCTGT
AAAGATAAGCTCAAGACATACAGAGTTATCATCACAACACTCACAACCGCTGGAAGGCTG
GTGTCTGCCGATTTCCCAAAAGATCACTTTTCTCACGTGTTTATTGATGAGTCTGGACAT
GCAGTGGAGCCTGAGTGTATGATAGCAATAGCAGGGCTTTTAAATGTGATGAATCCGCAA
AGCAAAGGAGGGCAGCTGGTCCTGGCTGGTGATCCGAAACAATTAGGACCAATATTAAGG
TCCCCGTTGGCTATTGAGCATGGATTAGATAAGTCTCTGCTTGAAAGGCTGATGACAGAG
AATTCTCTTTACCAAAAAGATAATGAAGGCTACAACTCCCAGTTTGTCACAAAGTTACTG
AAGAACTACAGATCGCATCCGAGCATTCTGAAGATTCCGAACGAGCTGTTTTATGATAAT
GAGCTTCAACCATGTGCAGATCAGCTGCTGTCAAACTCCTACTGCTCATGGGAAAAGTTG
CCTCGTAAGGGGAGGAATGGACTGGCTAAGATTTCCCCTAAAGACATCGGTATCATCTCT
CCTTACAGGAAGCAGGTTGAAAAAATCCGAAAAGCTATTGACCTCCAGTTTAAAGGGGTG
TCTGATATCAAAGACCTGAAGGTCGGCTCAGTAGAAGAATTTCAAGGTCAGGAACGGAAA
GTGATTATTGTATCCACAGTGCGAAGCACCAAAGATTATGTGAAGTTTGATGAAGATTTC
AGTCTGGGCTTTCTGAAGAACCCCAAGAGATTTAATGTGGCAATAACAAGAGCAAAGGCG
CTTTTAATTGTGGTGGGCAACCCAATAATACTTTGCAAGGATCCCAACTGGTCTGCGTTT
CTAAAGTATTGCGCTGATTCTGGAGGGTATACAGGTAATAGACTTGAAGATTGTGACGAC
CTGCTAAACGATGAAGAACTTGCAGAACTTTTCAGTGGCTTGGACATGAATGAACCACCT
GCAGGACAAGATACTGGTGAGAGCTTTGTCCAGCAGCATGTAGACCCAGGCTGGAGATCT
GATATCTGA
>g713
ATGGCGCCTGCCGTGCTGAGACTGCTGAAGTTTACTACCAAGGCGGCTGTGGCTGGTGGA
GCAGTGTATGTGGCCTATGACCAGGGGCTTCTGGGGAGCAGCACACAGGGGGAGGACGTC
CTAAAGAAGACCGCTTCTGCTGTGCCTCCAGCCTTGCAGGAATGGGCAGACTACTTTGGT
TGGCAGATCCCATCTGCACCAAAACTTGATTTCTCTGTCTGCGAGTCCTGGAACTGGGGT
GTCCAGAAATCTGTAGCGGCACTCTCATCTGCCCCAAGCAAGGCTTGTGAATACTCGGCA
GAAGGATGGAAGTACATGAAGGACCTTGTGAAGTGA
>g714
ATGGGCTCAGTGAGAGGATGGTGTACCATAGCACTGGTGGCGATTCTGGGATATCTTTAT
ATTGACAATTTCAACCTTGCCAGCCTTGCCAACGCTAGGGTCCTTGTCACTGGTGCAAGC
ACTGGCATTGGGGAGGAAATTGCTTATCACTATGCCAGGGCTGGAGCGGAACTTGTCCTA
ACTGCAAGAAGGGAACATGCACTCCAAAAGGTGAAGACAAAATGCATGGAACTTGGAGCA
AAGAACGTGTTCCTGGTTCTTGCAGACATGGGAGAACCTGCAGCTCGTAAGCAAGTACTT
GACCAGGCGATCTCTTTGCTAGGTGGCTTAGATTACCTGGTGTTAAATCACATTGGTTCC
ACCCCATTCAAGTTGTGGGAGGGAGATGTCAATCATACACGCTGGTTAATGGAGGTTAAT
TTTCTGAGCTATGTCGACCTTGCTTCTTTTGCGCTACCCTACCTGACCCAATCAAAAGGC
TCCATTATTGTCTTATCGTCCATGGCAGTCGCACGCCTTTAG
>g710
ATGGAGCTCCTGACTCTGCTCCTCGGACTCCTGGTCTCCGCCGTCCTCTGTTTCTACACC
TGGAGCATCATGTACCGGGCACGGAACCTGCCCCCCGGACCTACCCCGCTGCCCGTCCTG
GGGAACCTGCTCCAGCTGAAGACGGGGCAGATGGTGGACTCCCTCCAGCAGATGCATGAG
AAGTATGGCGATGTGTACACGCTGTACCTGGGCCCGCGGAGAGTGGTGGTTCTGTGTGGG
TACGAAGCCGTTAAGGAAGCTCTGGTGGACCAAGGAGAGGATTTTGGGATCAGGGGTCTC
TTGCCGGTCGTTGACTTATATTTTCAAGGACATGGGGTGGTGTTCAGTAATGGAGATCGC
TGGAAACAGATGCGTCGCTTCTCGATCATGACCCTCAGGAGCTTCGGGATGGGCAAACGG
AGCATCGAGGAGAAGATCAAGGAGGAAGCTCAATGCCTTGTGGAGGAGTTTAGAAAAACC
AACGGAGCACCTTTTAGTCCGGTTTTCCATTTCAGCCAAGTGGCCGCCAACATCATATGC
TCCGTCATTTTTGGCAACCGATACGGCTACGACGACGACGACTTCCGAAGACTCATGCAA
ATCATCGATGATATTTTTCGCTCTATGTCATCCTTCTGGGGTCAGCTCTTTGACATATTT
GATATAGTGATGAAACATTTGCCGGGACCTCACCACAGAACGCGCCGGTTCCTCCACGAA
TTGGAAGAGTTTGTCAAAGAGAGAATCGAGGCCGACAAGAAGACTTTGAACCTCGACAGC
CCCAGGCACATGATTGACAGCTTCCTGATCAAGATGGAAGAGGAAAAGAACAACCCGTCG
ACGCATTTCACCCTCAAGAACCTCCTGAAGAACACCGTGGTCATGTTCATCGCCGGCACG
GAGGGCACCAGCATTACGCTGAGGCACGCGTTCCTACTGTTACTGAAACATCCCCAAATC
AAACGTAAAGTCCAAGAGGAGATTGACCGTGTCATTGGCCGACATCGAGTGCCGGAGCCT
GAAGATCGCTCTTCCATGCCGTACACCCAAGCGGTCATCCATGAAATCCATCGTTTTGCC
AACGTGCTGCCCATGAACCTGCCCCACGCCACCACAAAGGACACCGAGTACCGCGGCTTC
ACCATTCCCAAGGGTACAGACGTCTTCCCGGTCCTGACCTCGATTCTGAACGACTCCAAG
TATTTCCCAGATCCGCACACCTTTGACCCAAATCGATTCTTGGATGAGAACGGAAGAATC
CGAGTTTGCCCCGGGGAGGGTCTTGCCCGCCTGGAGGTTTTCCTCTTTGTAATAAGCCTT
CTCCAACATTTCGACATCACCTCGCCCGTGGCCGCAGGGGACTTGGACATCTCGCCCCAG
ATGGTTGGCTTCTCCAACGTGCCGCCGCTGTACGAGATTAGCTTCATCCCGCGTTAA
>g716
ATGTCTGCCTCAGTGGTGAGAGCGACTATTAGGGCGGTGAGCAAGAGGAAGCTACAGGCC
ACCCGTGCCGCCCTTACTCTGACACCTTCTGCTGTAAATAAAATAAAACACTTACTTCAA
GATAAACCAGACAATATTGGGTTAAAGGTGGGAGTGCGTACAAGAGGCTGCAATGGTTTA
TCGTACTATCTGGAATATGCAAAGTCCAAAGGAACATCTGATGAAGAGGTAGTTCAAGAT
GGCGTGAGAGTGTTCATAGAGAAGAAAGCACAGCTAACTCTACTGGGAACGGAAATGGAC
TATGTAGAAGATAAACTCTTCAGTGAATTTGTTTTTAATAATCCAAACATCAAGGGGACA
TGTGGATGCGGTGAAAGCTTCAACATCTGA
>g712
ATGATGTGCACGTCAACACTGCACGCCAGCGGCACAGGTGTGACGCGTCCATGCGTGTGC
CGCGTTGACGTGCACGTAATCTCGCGAGCGACACCCATGAGCAGCGGCACGAGTGAAGAT
ATTGATGAATGGGATGATGCTGCCCTTATAAAGTCTTATGAGAAAGCTGTGCAGTCCTTC
CAGGACATGCTAAGATGCAATGATAAGAATAGGAGACCAGAGGGAACCACTGTGAAAGGA
GACCCTCAGAAAGATAGCCAGCGTGAGGTACTACGTGAAACAGACTGGGAGAGAGAGGGT
CAGAGAGATCACTCAAAGGATGAAGTGGAAAAGTGGAGCAAAAAGAAAAAGGTGCAGCCC
CCACCTCTTCTCACACGACCCCTTGCTTCCAAATGGAAGGTGGGGGATCCCTGCAGTGCT
GTTTGGTCAGAAGATGGCTGTGTTTATCCAGCTACAGTGAAGTCTATAGACCGGGAAACT
GGGACATGTGTAGTGCAATATGATGGCTATGGAAACACTGAGAGACATCAGCTTGATGAA
ATAGTGTCGGTGGGGAGCAGTGGTGATAGCACCCCTCCTGTCAGACAGTGGAAAGTTGGC
GACCGTTGTTCAGTGCAGTGGTCGGAGGATGGACAGATGTACTGTGCAATTATTCGCTCT
GTGGATGAGGTGCAGGGCACCTGTGTGGTGGTGTATGAGGAATATAAGAATGAGGAAGAG
CACAGCTTGGCTGACTTGATGCCTCCACCCAGTGCCCTCCTACGTTCTCGCGGCAAGAAG
CAGGCGAGTCCTGCACCTCTAGGACTGGACAGCTCAGGGGTACACAGCCTGACATGTCTG
GGGCAGACCAGTGGTATGATGCCTGGACTATTTAAGGACTGGCAAATATAA
>g687
ATGTCGGGCTCTCCGGACGAGAGCTCGGTGCGGGTTGCTCTCAGAATTCGACCACAGTTG
GCCAAAGAAAAAATTGAAGGCTGTCATATTTGCACGTCTGTTACACCTGGAGAGCCTCAA
GTACTGCTTGGGAAAGATAAAGCATTTACCTTCGACTATGTCTTTGACCTTGATTCAAGG
CAAGATGAAATCTACACTCAGTGCACAGAAAAACTTATTGAAGGCTGCTTTGAAGGATAC
AATGCAACCATTTTTGCATATGGCCAAACAGGTTCTGGAAAAACCTACACTATGGGAACA
GGATTTGACGTGAACATATGTGAAGAAGAACAAGGCATCATCACCCGTGCTGTTAAGCAT
CTTTTCAAACTGATTGAGGAAAAAAAACAAGCTGCTCTGGAAGAAGGGCTTCCACCACCA
GATTTTAAAGTTAATTCTCAATTTTTGGAGCTTTACAATGAAGAAGTACTTGATTTGTTT
GATTCAACCCGTGATATTGATGCTAGGAACAAAAAGTCAAACATCAAAATACACGAGGAT
TCGAATGGAGGAATTTACACAGTTGGAGTCACAACACGTAGTGTGAGCTCAGAAGCCGAG
ATGATCCAGTGCTTAAAGCTTGGTGCCTTATCCAGAACTACTGCCAGCACCCAAATGAAT
GTTCAGAGTTCTCGTTCACACGCCATTTTCACCATCCACTTATGTCAAAGTCGTGTTTGT
TCCAAACTTAATAACGAGAATGACTTGGATAATAGGATCACATCTGAATCTAATCAAATG
AATGAGTTTGAAACCCTTACTGCCAAGTTTCATTTTGTTGACTTGGCTGGGTCAGAACGG
TTGAAGCGAACTGGAGCTACTGGAGATCGAGCCAGGGAAGGCATTTCCATTAACTGTGGA
CTGTTGGCCCTTGGAAATGTAATCAGTGCTTTAGGAGATAAAAGTAAGAAGGCCACTCAT
GTGCCTTACAGGGACTCTAAGTTAACACGACTGCTTCAGGACTCGCTGGGAGGTAACAGC
CAAACGATTATGATTGCTTGTATAAGCCCTTCAGACAGAGATTTCATGGAAACACTGAAC
ACGCTTAAGTATGCCAATCGAGCACGTAACATCAAGAACAAAGTTATGATTAACCAAGAC
CGAACTAGTCAGCAGATAAATGCATTGAGGAATGAAATAGCCCGTCTGCAGATGGAGCTG
ACCGAGTACAAGACAGGTAAAAGAATTATTGATGAAGAAGGTGTTGAGAGCATCAATGAT
ATGGTCCACGAGAATGCAATGTTGCAAACTGAAAACAGCAATCTACGGGTGAGAATTAAG
GCCATGCAGGAAACCATTGATGCTTTAAGAATGAGGATCACCCAGCTTATGAGTGATCAA
GCCAACCAGGTCCTTGCTAGAGCAGGAGACGGAAATGAAGAAATAAGCAACATGATTCAC
AATTATATCAAAGAGATTGAGGACCTACGAGCAAAATTATTAGAAAGCGAAGCAGTGAAT
GAAAACCTTCGGAGAAACTTGTCAAGAGCTTCAACAAGATCATCCTACTTTTCTGCTCAT
TCTCCTTTCCCTGCATCTTTACTTCCTGCGGAGAAAGAAACCACTGAAATCATAGACATG
GCAAAAAAAGACTTGGAAAAATTGAAAAAGATTGAAAAAAAGAAGAAGAAAAGTGTTGTC
AGGGATGAGAACACAGAGAATGAGAAGTCAGATGAAAAGGGGATTACTGAAGGAGAAATC
CATGAATTGGAAGAAGAAATTCATGAAGGGAGCGATCATGAAGAAGACGAGGAGGAAGAC
GAGGAGGAGGATGAAGATGCTGGCGATAGTTCAGATGAATCAGATTCTGAATTGGAAGAG
AAAGAGAATTACCAGGCTGATCTGGCTAACATTACCTGTGAAATTGCTATAAAGCAGAAA
CTGATTGATGAATTAGAAAACAGCCAGCGACGATTGCATACTCTAAAGCAGCAGTATGAA
GAGAAACTGATGACCTTGCAGCATAAAATACAGGACACTCAATTAGAGAGAGATCGTGTC
CTGCAGAACATGGGATCAATGGAAACATGCACTGAAGAAAAAACAAAAAAGATCAAGACT
GAGTATGAAAAAAAGCTTCAGACAATGCATAAAGAACTTCAAAAACTGCAGGCCGCTCAA
AAGGAGCATGCCCGGCTCTTGAAAAACCAGTCACAGTATGAAAAGCAGATGAAGAAGTTG
CAACAGGAGGTGGTGGAAATGAAGAAAACAAAGGTACGGCTTATGAAACAAATGAAAGAA
GAGCAAGAGAAGGCCAGATTAACAGAATCACGCAGAACCCGTGAAATTTCACAGCTGAAA
AAGGACCAGCGGAAACGAGAGTATCAGCTAAAACAGCTTGAAGCCCAAAAAAGACAACAA
GAAGTTGTGTTGCGTCGCAAGACAGAAGAGGTCAATTCTCTTAGACGGAAAGTAAAACCA
ATGTCTGATAAAGTTGGTGGAAGGGTGAATCGAAAAATAAGTTTACCTGAGCCCATTTCT
GAGCATGTATCAAATTATGCAGATGATCGTGATTCTACGAGAGGAGTAGGAAATCAGAGA
CTGAGAATTCCTGTTGCCAAAGTGCAGCCTGCGACGACCACCGCATTAAATGGAACTAGG
AAAAAACATCAAAGAACAAGCATTTACACTTCAAAGGCAGCCAGACAGAAGTGGCAGTCA
CTGGAGCGCAGGATCACTGACATTGTGATGCAGAGGATGACTATTTCTAATATGGAAGCC
GACATGAACAGACTACTGACGCAACGGGAGGTACTTACAAAAAGAAAAGAAAAGGTGATG
AAGAAGAGAGACCGAATTTTGAAGGAAAATGGAGAGGCCGACAAAAATGTTTATAACCTC
AATGAAGAAATTGAGTGCCTTAGTGCCAATGTTGACTACATAAATGACAGCATATCTGAC
TGTCAAGCCAGCATCATGCAGATGGAAGAGGCAAAGGAAGAGGGTGATACGTTGGATGTA
ACTGCGATTATTAGTTCCTGCACTCTTACAGAAGCACGATACTTACTTGATCATTTTCTT
TCAATGGCTGTCAGCAAGGGTCTATTAGCAGCACAGAGAGAGGCTCAGATTAAAGTTCTT
GAAGGACGTCTCAAACAAACTGAATTTACCAGTGCTACTCAAAATCAGCTTTTGTTTCAT
ATGTTAAAGGAAAAGGCGGAACTGAATCCTGAACTTGATGCTCTTCTAGGCCATGCTTTA
CAAGGTGAACAATCTGTTTCATTTGATCAACCTGATGTTAATGTTTACTTTTTTTTTTTT
TTTTTTAAAGAGAATACAGAAAATAGCAGCGATGAAGAAGGGTCATTGCAGAGTCCCGGA
ACAGAAGGCAGTTCCTTGTCTTCAGATCTCATGAAACTGTGCGGTGAGGTGAAACCCAAG
AGTAAGGCTCGAAGGAGAACTACTACTCAACTGGAGCTGCTTTATGCAGATAACGTCGAG
TCACCCGCGGATCCAGGCACAGGAGACCCTGGTGTGTCCACTTACCTCCCGCCAGTGGCA
GAAGTTCCAGAGACTGTACCGAACTTGGAAGCAAGTGGAAATAATGTTAGGGAGAAAGAT
CTACAACAACCATCTTCTGGGTTACCTTCTAAAATAGGCAGCATGGCAAAGCAAATCCCT
TTGGCTGAAAAACGTGTACCTGAACCGTCCCCATTATCAAGAAGGAAAACTTATGAAAAA
GGTGGAGATAAAACAATAAAAACCAAAGAACAGAAGTGCTCAGATTCTGGAACTTCAGAG
GCTAGTCTGTCACCTCCTTCTTCCCCAACAAGTCGGTCCCGTAACGAAATGAATGTTTTT
AGCCGTCTCACAGTTTCTCAGGGAAACACAGCCTTTCAACAGGATAAGGGCATAATTAAC
CCATTTCCTACCCCCAGAGGCAGCAAGTCATCACTTTTGCAGTGCACTCACATAGCCGAA
GGGCACAACAAGGCTGTGCTTTGCCTAGATGCTACTGATGATCTGCTTTTTACTGGATCT
AAAGACCGTACTTGTAAAGTATGGAATCTTGTCACTGGGCAAGAAATTATGTCTCTTGGA
GGTCATCCGAATAATGTTGTGTCGGTGAAGTATTGCAACTACACCAGTCTGGTGTTCACT
GTTTCAACATCTTATATTAAGGTGTGGGACATCAGAGACTCTGCTAAATGTGTCCGGACA
CTTACATCTTCCGGTCAAGTGGTGGCTTGGGATTCATGTGCTGGAAGTCAGAACCGAACA
GTAACTATACCTGCTGGAGAGAACCAAATCAATCAAATTGCACTCAACCCCACAGGCACT
GTACTTTATGCAGCTGCTGGAAATGCTGTGAGGATGTGGGATCTAAAGAGGTAA
>g722
ATGGACTCCCTGGGCACCGTATTTACCTTCATTTCCAGCGAAACCAGGACAAAAATCAAC
ATCTTGCAGGGCTACCTCGACGGAGAACACGGCCAGAGCTACAGGACCATCTCCTCCATG
ATCAGATACGAGCTGGACAACCAGGTGGTCAATTTCAGGGAACTCCCTCGCAATCGAGTG
CCCTCCGGGTGTCGGACCCTCTTGCGCATGCATCGCGCTCTCAAGTGGTTGGAGGACTTC
CTCTACAAGGTGGGCACCAGCCCTGGGCAGGAGAGGACTTCCGAACTCTGTGCCGAGTCT
TATCACAAGACGCTGGCCCACCATCACAGCTGGTTCATCCGACAGGTGGCCGAGGTGGCT
TTCTTGGCTCTCCCGCCCCTTGAGAAGATGTACGAGGTGGTGTGCGTGAAGGACCAAGCC
GAGGCCAGAGTTGTCCTTCTGACCACGGTGGACGCCATAGCTAAAGTGTACAACATCACT
CAAGAACTTTACACAGATAATAAAATGCTTGACCTGCCGTGA
>g719
ATGGTCCGTTTACACGTAAAACGGGGCGATGAAAGCCAATTCCTTTTTGATACAACAGTT
GGCGTCTCTGTGGATGATCTGGTCAAACAGGTAACGGCTATTTACAACGGAAGGCTTAAA
GTGGACAGACTATGTTCAGAGATGGGAGAGCTGTCGGAGCACGGCATTACTCTGCCCCCA
AATATGCAGGGGCTGACTGACGAGCAGATCGCAGACCTAAAACTTAAAGACGAGTGGGAA
GAAAAATGCGTCCCTAGTGGGGGAAGTGTCTTTAAGAAGGATGAGATTGGAAGACGAAAT
GGACACGCACCAAATGACAATATGAAGAAGGTGTTACAGAAAACCATTGAAGAGGCAAAG
GCCTTGGTGTCTAAGAAACAAGCTGAAGCTAATGTGTGCGTGACAATGGAAATGGTGAAA
GATGCTCTGGACCAGCTCCGAGGGGCGGCCAGCCAACTAGTTATCGAAGAACCTGCCGCT
CAGTTATGGTGGGCCGGCAAAGAGCTGCAAAGGAATAAGAAGCTTTTGGATTTTGTGGGG
AAGAATGAGAAAACCAAAATTATTGTTAAGATACAAAAGAGAGGTCAAGGAGCTCCAGCA
CGTGAACCAGTTGTCTCAGAAGAAGAGCAAAAGAAATTAATGTTGTATTACCATAGAAGA
CAGGAGGAACTTAAGGGCGCAACATGCTCCGACACGCAGACGGGCTGTTCCCGCACACAG
AGCCCCGCCGAGGCCATGTATCCAGACCTACATTGA
>g728
GTTCGGAAACTGGTTGATGTATCCCCCATCAAAGAACTGCTAAACCAGAAATGGAATACC
TTTGGCTACAAAAACTTCCTGATTTGGATGGTCAGTTATCTCGTATACATGGCTATCTTC
ACCACGGTCAGTCTGTTTCGCCCATTAAAACCGATAACCGAAGGCCATACGGATAACATA
ACCGTCATGACGCAAAAATCCCTCTCTGAATCTTATGAATGCAAAGAAGATTTTCTGAGA
CTGGTGGGAGAGTTAATTACTCTGTTTGGAGCAGTAATCATATTTGTCAGGGAGATTCCT
TTACTCATTAAACTTGGTCCTAAGAAATATATTGGCAATGCATCTACCGGGGGTCCTTTC
TCCTTACTAATGGTGGCATATTCCGTGCTCATATTCTCTGCGGCGGTGTTGAGAACGCTC
GGAGATGAGGGAGAAGCCATTCCGCTCTCTCTTGCCTTGATAATTGGATGGTGCAATTCA
ATCTACTTTGCCAGAGGATTTAAAATGCTGGGCCAGTTTTCAATAATGATTCAGAAGATA
GCTGCTACCATTCTCGTTCTTGAACGTCATGTTCCAAGGTTCCTTAAAGTACGCACTGGG
ATTCCAGGGAGCTCCTTGGGTCTGGATGATGGCAAGTGGTATATTGGGGTTGAAGAAATA
TTGAATGAAAACAGCACTGAAAATATTAAAGACTCGACTGCTTTATCCAATCAACCCATT
GTTTGCTGGAATTTGATCCGAAAAAACATTTCAAGAATTAGCAGTATGAGTGGCTTTACA
GAATCGACCTCATTATAG
>g730
ATGGTGATAACGTTTTTGTCTTCCGAGGAACGGATAGAAGTGTCAACTATGCATCTCCTC
AGCTTTCTCCTGATATCCATCGTGCTATCAATAGTGTATGGCACAAGTGTCCACGATGAG
ACCGTTACAGATTTCTCTGTCAAGTTGTATCATGAGCTGAGAGCCACAAAAGAAGATGAG
AATATTTTCTTCTCTCCACTAAGCATCGCAATCGCAATTGGAATGGTAGAGCTGGGAGCG
CGAGGATCCAGTCTCAAGGAGATCCGACATGCTCTGGGATATGACAGACTGAAGAATGGT
GAAGAATTTACTCTGCTGAAAGATCTTTCCAGCATGATGACAGCCCAGGAAAGACACTAT
GTGCTCAGCATTGCAAACTCCCTATATTTACAAAATGGATTTCATATCAGTGACAAGTTC
ATTCAGTTAATGAAAAAATACTTCAAGGCAGAAGTAGAAAATGTAGACTTCAGTCAAGGT
TCGGCCGTGGCAAATCACATCAATACATGGGTGGAAAATCACACTAATAACCATATCCAT
GAGCTGTTTTCATCTGAGGATTTCACTGAATTGACAAGGTTGGTTCTGGTTAACGCAATC
TACTTTAAAGGCAATTGGAAATCACAATTTAGGCCTGAAAACACCAGGACCTTCTCATTC
ACCAAAGATGATGAAAGTGAGGTTCAAGTTCCAATGATGTACCAGAAGGGGGAATTTTAC
TACGGGGAGTTTACTGATGGATCAAACGAGGCAGGAGGAGTTTATCAGGTCCTGGAAATG
CCATACGAAGGAGATGAAATGAGCCTTATGATCATTCTTTCCAGGCAGGAAGTCCCGCTG
GCAACACTCGAACCTTTAGTCAAAACATCTTTGATTGAAGAATGGGCTAATTCTGTTAAA
AAACAAAAAGTGGAGGTTTACTTGCCAAGATTCAAAATTGAAGAAGTGATTAATCTAAAA
GACGTTTTGAAGCCGCTTGGCATCAAAGAGATATTCGCAAGGCAAGCTGATCTCTCTGCG
ATATCCGAAAACCAGGATCTTTTTGTTGACAAAGCTGTCCATAAATCTTACCTTGAGATT
AATGAAGAAGGTTCTGAAGCAGCAGCAGCTACCGGAATGGTTGCCAATAGTAGAATGGCC
GTGCTGTACCCTCAAGTTATTGCAGACCACCCTTTCTTCTTCCTGATTAGAAACAGGAAA
ACTGGTTCTGTTTTGTTTATGGGAAGAGTCATGCACCCAGAGGCACTGAATTCTAGTGGC
CATGATTTCGAAGAGCTGTAA
>g697
ATGGAGTCCACCGAGGACCATATGCTTCCTCGCAGGCCATCATATCTTGGCGTGGGGATA
AATCTTCCAGAAATGTCAGAGCCCCAGTCAGTTGATGACATCAGAACCAACCTGGCTGAC
AAATTTCTTTTACTTGAGGGATCTGATGCTGAACCTAATCAGAAAAATTCCTCAGACTCC
AATGAAAATATGCACGTTTACTTGAGAGTCCGGCCATTCACTTTATCTGAGATCGAACAA
AGAGAGGCGCAGGAATGTGTCAGTATTCCAGATTTCAAAAGCGTTTTGGTCCGAGCACCA
CAAAGTTCCCAGGCTGGTAGACTCAGTGACAAGGGCCTTTGTCCAATGGCTCAGAAATTC
ACGTTTACTCAAGTCTTTGGTCCGGAGACAACCCAACCTCAGTTTTTTGAAGGGACTATA
AAACAGCAAGTGATTGATTTTATGAAAGGTCATAATCGACTTATTTTTACATATGGTGTG
ACCAATGCAGGAAAGACTTTTACATTCCAAGGTACAAAGGATGATGCAGGCATTTTGCCT
CGATCTATGGAAATGCTTTTTAACACCATTCAAGGAAATGTTTATTCAAAGATGGACGTG
AAGCCTCACAGATGTAGAGATTATATAAGATTAACAAAAGACCAAGTAAAGGTCGAAGTT
GCCTTCAAAAATAATGTACTGCGTCAAATTAAAGAGGTTGATCCGCAATGCAGCATAAGA
AGTAACAGCAGTAGAACCTCAGCAGATACAACAGACTTTCTGAATGATGAAGTTGTCGGA
GGTTTTGTAAATTCGAGAGTCATAGAGTTTGAAGATCGCTTACCGCAGTGTGAAGAGTTC
AGATTAGATCCAGACAGTACTGCAAAATACTCTGTCTGGGTTTCCTTCTGTGAAATCTAC
AATGAGTGTATATATGATCTTCTTGACCCCATATCTGGAGATAAATTCTATAAACGGAAG
ACTTTGCGGCTTGCCCAGGACATCAAAGGATTCTGCTTTGTTAAAGATCTACAGTGGATA
CAGGTGTCTGATGCAAAAGAGGCATGCCGCATACTGGCCTTGGGCAAAAAATTCCAGAGC
ATTGCATTTACAAAGTTAAATAGTTCTTCGAGTAGGAGTCACAGCATATTCACTGTTCGT
CTCTTAAAAATTGAAGATGCTGATATTCCTCGTGTTGTCAAAGTTAGTGAAATGGCACTT
TGTGACTTGGCTGGGTCTGAAAGATGTACGAAAACCCAGAATGAAGGGGAAAGATTAAAA
GAGAGTGGAAATATAAACACCTCCTTGCTGATACTCGGTAAATGCATCAATGCATTGAAG
AACAGTCAGCAATCAAAGATTCCGCAGCATGTGCCCTTCCGAGAAAGTAAGCTCACACAC
TACCTTCAAAGTTTCTTTACTGGCAAAGGCAAAGTGAGCATGATTGTCAACATCTGTCAG
TCGGCCTCTTCCTATGATGAGACTCTGAATGTGTTGAAATTCTCAGCTGTGGCGCAGAAG
GTCCTTATATTGGATTCTTGTCAGACTTCAGAAAGTCTAACATATGGTCAGAAAAAGAGT
GCTAGAGAAGTCTCATTTATAATAAACAATGCTGACCGCAAGATATGGACGTCAAGAAAA
CGGGCAACTGTGCAATGGGATTCACGATTAGAGGATGTCCTAGAGGATGGAGATGATTCA
GAACTTGAGGACAACTCTGAGGATGAAGAGTGTCTTGACTGTACCAATCTTGATGATCTT
GATGATGAAGAGGAGGCGAATGACGATCAGGAAGATGACATTATCATTAAGAAAGATGCA
TACCAGAAACTGTTGGATCTAGTAGAAGACTTGAAAACCAAACTGGTAAATGAGAAAAAA
GATAAACTCTTAATGGAACTTAGAATCCGTGAGGAAGTAGCAAAAGAATTTACCCAACAT
TTTATGGAACGAGAGAATGACTTTAGTGAACGTTTGGAAAAGGAAAAGGAGTTAATGGAA
GAAAGGTGCGATGAAAGATTGGAGATCTTCCAGGATTTGGTACGAAAATGTACAGAAAAA
CAGGATGGAGAAGAACCCAATCCTACAAAATGCACCGAAGCTGAGCCTGCCATTGAGGTG
GGTGAAACCAGTCTGCCACTCCAGGGACTTTTCTCCTCTATGCAGACTGATCTGGCAGTG
ATTAAGAAGCAAGCAGTAGAGGCTCACTTGCAGATTGCTGCCATTCCTGATGTTCCAGAT
ATCACAGCAGGCCTGGAAGAAAGGTTAAAAGAAGTGTCATCTGACCTCTTCAAAACTCAG
GAAGAATTGAAGAAAACATCTGCTGAGCTGGAAAAGCAAATTGAAAAATACCGTAAAACA
AGCATTCACCTGGAAGAAGCTGATAAGAAACTCTCTGCTCAAAAACTGCAAATTGATCAG
ATGATGCAGATGATGCAGCAAAAGGAGTCTGCAATCGACAAACTAAAAGAACTTGTGTCT
CACTGGGAAAATAAATATGAAGATTATGCGAAAACCATGAAAGAAATGAGAGGGGGAATG
GAGAAAGTCGGCAGTCATCCAACGGTCCTTCCTATCGGACGTAAACGGCCACCAGAGGAT
CATCACAAGGAACAGCCCCCTTCAAAGAAAGAAGTAAACGAAAGGACTTCACCAAACATC
TCACAGACATCCGACCTAAAAGCTAGAGAGGAAACAGATGCTGTAAAAGAGCTGGAAGAT
ATAAAAGCTGAAAAGGAACAGCTTAAAAGACAAATAGTTGACCTTAACCAGACCATTACC
CGTTTGGAAGATACTATTGCTAGAAATAATGAGAAGCTAGTAGAAATAGAATCAAAAAAT
ACAATTATTTCTTCTGAACTCCAGACATACAAAGAACGTCTAACCAACCAGGAGGGAACC
GTTAAAAGCTTATTGCAGGAAGTAGATCAGAACAAGGAGAACATCTCTATCAAGGTGGCA
CAAATTAGAACAATTCAAAATAAACTTGAATTGTTTAAAGATTGTGAGATAAAGGAACAG
TCCACTGAGGAGTTTTGTAATTTTAATGACTGGATGAAGAAACCAATGAATATAAGGAAG
GAAATAAACTCTGAAGTGGATAACAAAGATCATCCAGCACCCAAAGTAGGCTCAGGGCGA
GAAAGTGCTTTCTACAGTGCGGTAGAAGGTCTGTGGAAGAAATGCCATGAAGTTCTGCAA
GAGTTGGCAAAAAAGAACCAGTTCATTGAACAGCTCGAAGAAAACATCAATACACTAAAA
GATGAAGTTACGTTGCTCAAAAAAGAAAATGACGGTTTACAACTTACACAAGCTAGTAGT
TTTGAGAAAGATGGCCTACTCAAAGAAAAAGACAACTTCATAAGCCAGCTCCAAGGTAAA
TTGTCTGAAAAGTCAAATCAACTGGAGATACAATCTAAGCTAGAACTTGATTCACAAAAT
GAGATTTTGGCACTTAAGAAGCAGCTTGTTGAGAATAAACAGAAGATAAAGGACCAGGAG
CGCACCTTAGATTCTTATAATGAAAAATGTAATAAATTAGAAATTCTGGAAAAACAAATC
AAAGAAAAGGCCTCTGTTATCCAAGCATTGGAGAAACAATTGGAACAGGCCCAAACGGAA
AAATCAGGCTATGAAAAAGAACTAAATAAGTTGAATCATGACAAAACGGAGTTGGAACAA
ATAACTACAGATGTGAAGGAAAAACTTAAAGCTGTTGAAAACACAAACGGCAAGAAGCAA
ACGCAGCTTGATGATTTGTCAAAGCAAATTGAACTGTTAAAGAAAGACCTTTCAGGAAGA
ACATTGGAAGTTAAAACTCTTCAGACTGATCTCCAGAGAAAAGATGAGGACTACGCCGAT
CTGAAAGATAAATTAGCGGATGCTAAAAAACAAATACAACAAGTAGAGAAAGAGGTCTCT
GCCATGCGGGAAGAGAAAAAGCTGCTCAGTAACAAAGTGAATGAATACGAAAAATTAAAG
AACCAGCTGTCTTGTGAATTGGAGATGAAGCAGCGCACAATCCAGCAATTGAAAAAGGAA
CGTCTTAATAACGAAGGCAATGAAGATGCAACAAACCTTTACCGGAAGACCTGCCAAGAT
GTACAAGCAAAAGAAAAAATAATTGAAGATATGAGAATGACCCTTATCGAGCAAGAACAA
ACTCAGGCAGAGCAAGATCAAGCACTTGAGGCCAAAACAGAAGAAGCTGAAAAATTAGCT
GAAGAACTCGAAATATGGAAGCTTAAGTATAAAGAATTGGAGAAGAACAGCCACAGAGAA
CTTATAACAAAACTTTCTGTTGAGTCGAGTGAGACAGAAAGGGTGGATTCCCAAGTATCG
AAACTACAGGCTCAATTAAATCAATCGGAAGAAAAGTATAGCAGCGAAAGAAAGAAATGG
TTGGAAGAAAAAATGAATTTACTTGCTCAGGCTAAAGAATCTGAGACTCACAGGAACAAA
GAGATGAGAAAGTTTGCTGAAGACCGAGAACGCCACGTGAAACAACAGGGAGAGCTGGAA
CAACTTTGTGCTCAGCTTGCTGAGAAGGAAAATACTCTGCTGAAGTGGCGTGAAGAGCGT
GACCAGCTTGTATCAGCTCTGGAAGTTCAGTTGAAGAGTCTCCTTTCCAGCAACATGGAA
AAAGAAAGAGAGATTGAAAATCTTAAAAAATGCAGCACTTTAAAAACAGAAGGGGAAAAT
GTTGATGATCTGAAGAAACAATTGTGTTTGTGTGAGAAGAAAATCAAAGAGCTAGAGGAG
AAACTTGCTAATCTGGAAAACTCCAAAGCAACACATACAGCAGAATCACCAGATGATCAG
CAGCTAAAGGAACAACCAACAGAGATCGCTGATCCACCACAACGTCCTAGTCCTTTCCAA
ACAGAGACCAGCAGATCAAAAGCTTCAGATAGCAGTCGTGTTTCAACGGATGACTGTCAG
TCACAGGATGGATCGGGAACAGTACTGGACTCTTCTGAGATTTCGACAGAAAATGGGCGA
GTCAGCAGGTTCCCGAAACCAGAGATGGAAATACGTTTCAGCCCAGCAAGGCCCAACAAA
ATGGAAGTAAAACATTGTGGGGAGGACTCGCCAAGAACAGTAAAGATAACTAGAACTACA
AGAAAGAGAAAGAGCCATGAAATGGAGCAGGACATTGTAAAAAGTGAAAACAAGAGAAAT
ATAATATCGCGAACTGGTGTAAGGACCCCTTCCTCGCAATCTAGCCCAACTGTAAACCTG
AATGAAGCCAAGAGAAACACCAGAAATACAATAACAAAACAGCAATCCACATCAAGTACG
TTATCAGTACAGAAAAAAGACGGAACCCTGCAAAAACTTGGAGGCTTTTTACAAAGCTCT
CCTTCCATCTTCCAGAGTAAAGCCAAAAAACTACTTGAGACAATTAGCGCTCCCAAGACA
ACGGATCTGGTTGGCAGTAAAAAAGAAAATGACGTTAAGCCCAAGAAAAGCAGGAGAAAG
TTGTACAATACTGATATTTCAGCTCCTCTGGACTTCATTGCCCCTACGAGTATCGTGGAC
AAAAAAGAAAAGGAAAGTGACCACTTAATAATGAAGAGACGCCTAAGAACAAGAACAGCT
AAATAA
>g736
ATGAACTTCCCCGGCCTGAAGGAAGACTGCGAGACCCTCCTGAGCCGCTTCCAGGCCACC
GACAGCGTGCGCTACGAGGAGTTTCTGGCCATATGGAAGGATATGCAGTTCTCCAAGATA
TTTGTAGGTGGGATGAGGACTCTGGAGCGGAATGGGTTCACGGAGGAAGCGTTCTCTATC
GCCTGCTTGTATTTCCTGCCGCCTTACACCTTCCAGATCCGCGTCGGCGCTCTCTACCTG
CTCTATGGCCTCTACAGCACGCAGCTTTGTGAACCAAAGCGACAGATCCGGATATCGTTA
AAGGACTGGAGTGAAGTTCAAAGCTTCCACCAGGATCTGATCAGCGCGAACCATCTGGAT
GCGGCTTACGTCTTCCTGCAGATGCGTTTAAAGCGCGCCTTCCGCTTCACAGCGATGCCA
AAATTGCTTACATTCCAGACCCACAAAAATACCCCGAATAGCAGCGGGAAAGAGGAGTTT
AAGGATGTTCAAGACAGAGTGTCAAATCTGGTGACATCGGACACCCTGGAG
>g733
ATGCTGGGACTGGATGAGCGGGACAAGTCTTTGCAGATGATCCGACAGCTGGGGTCACCA
TTATTTGCGGACAATACACTGCAGTTCTACAATGAGAGAGTTATCATCATGAGCTCCATC
TTGGAGAACATGTGTGCCGAGGTTCTCCTGCAGACGGCCACACAGATCAAATTTACGGTG
TCTGGCAGCGAGCCCGTGCCTTATGTCCATCGGCTGCCACCCAAGAAACCCATCAAAGAA
GTTCTCAGGGCCACCTTCAGTGCCACCTTAGAGAAGGGATGGGTAGACAGCCGTTCCCTG
CACGTTTTTGACACGCTACTTCACATGGGTGGCGTGTACTGGTTCTGCAATAACTTGGTG
AAGGAGTTACTGAGGGAGACACGGATGGAATTTGCTTTGCGGGCGGTGGAACTTCTGTTT
GCCATCTTCTGCTTGGACATGCCCCAACTCACTCTCACTCTTCTAGGGCACGTGCTACCG
GCCCTTCTCACAGACTCTGCCAAATGGCACACGCTGATGGACCCGCCAGGGAGAGCGCTG
GCAAATGTGACCTCTGACCCTCAGGATTACAGCAGCCTCTTTCCATTGGATGACACTCAA
CAATCCAAATTGATGCGTCTGCTTAGTTCCAACGAGGAGGAACACGCCGTACAAGCCAAT
CCCACCGATCGCCCGATGAACAGCTCCCTGTCTGCATCTCAGATCCACAACATCAGTTCC
AAAGAGCCCTTAAACAGAGTGCTTGCAAATCTTTTCCTTTTGATCTCATCTATACTCGGT
GCCCGGACGGCGGGCGCTCACACTCAGTTTGTGCAGTGGTTCATGGAGGAGTGCGTGGAG
AGCCTGGAGCAGGGAGGGAAAGGCGGCATCCTGCAGTTCATGCCTTTCAGCATGGTGTCA
GAGTTGGTCAAAGTTTCCACGTTATCCAGTCCAAAAATCGTGCTGGCCATCACCGATCTC
ACGTTACCCCTGGGCCGTAGAGTGGCTGCGAAAGCACTGACCGCTCTTTGA
>g731
ATGAAGGAGGCTACGGCTAAGCGGCGGGAGCCCGAAGATGTGGAAATGAAAGAAGAAGAG
CCGGCGGCTGGAACCGGGGAGGGAGGGAAGAAGGAGCTGGACAGCGTCACTTTGGAGGAT
ATTAAGGAACATGTTAAGCAGATTGAGAAAGCCGTTTCTGGGAAGGAGCCGCGCTTTGTC
CTTCGTGCGCTTCGAGCTTTACCATCCACCTCACGCCGTCTCAACCCAAATGTCCTGCAC
AAGGCTATCAATGGCTTCTTCACATCCAACCCTGCCACGCGTGACATGCTGCTTGGTTTC
CTGGAGGAGCTGATGGATACGGAAGGAGACCTGCAGTTCCGTCCTCGCACAGGGAAAGCT
GCTTCAGCACCTCTACTCCCTGAGGTAGAAGCTTATCTGCAACTGCTCCTGGTGATTTAT
CTGATGAACAGCAAGCGCTACACAGAGGCCCAAAAGGTGTCAGATGACCTGATGCAAAAG
ATAAGTCCCCAGAATCGTCGCGCTCTGGACCTGGTGGTGGCAAAATGCTACTATTACCAC
TCCCGCATCTATGAGTTCCTCGACAAGTTGGATGTAGTCAGGAGTTTCCTGCATGCAAGA
CTGCGCACCGCCACACTCCGGCATGATGCAGATGGCCAGGCTACGCTGCTGAACTTGCTG
CTTCGAAACTACTTGCACTACAACCTTTATGACCAAGCCGAAAAGCTGGTATCCAAGTCT
GTATTTCCTGAGCAGGCGAACAACAATGAATGGGCTCGATACCTTTACTATACTGGTCGT
ATTAAAGCTATCCAGCTGGAGTATTCAGAAGCCAGGAGAACTTTAACCAACGCTTTGAGG
AAGGCTCCCCAGCACACAGCTGTAGGCTTCAAGCAGACGGTCCACAAACTTTTAATTGTA
GTGGAACTGTTACTTGGAGAGATCCCAGATCGTCTTCAGTTTAGACAGCATTCGCTCAAG
AGATCGCTAATGCCCTATTTCTTACTGACTCAAGCTGTTCGCACGGGTAATTTGGCCAAG
TTCAACCAAGTCCTGGACCAGTTTTGTGATAAGTTCCAGGCAGATGGAACCTATACACTT
ATCATCCGCCTAAGACACAATGTCATCAAGACAGGTGTTCGCATGATCAGTCTCTCTTAT
TCGAGGATTTCATTGCCTGACATAGCCCAGAAGCTGCAGCTGGACAGCCCTGAGGATGCA
GAGTTCATAGTGGCCAAGCCAGCCGATACGTCCAGTGGAGATGGGGGAGCCCCAGCTATT
AATCACGAGAAGGGCTACGTCCAGTCCAAGGAGATGATTGATATTTACTCCACACGGGAG
CCCCAGCTGGCTTTCCACCAACGCATTTCTTTCTGCTTAGACATACACAACATGTCTGTA
AAGGCTATGAGGTTTCCACCAAAATCCTACAACAAAGACCTGGAGTCTGCAGAGGAACGC
CGTGAGAGAGAGCAGCAAGACTTAGAGTTTGCTAAAGAAATGGCAGAAGATGATGACGAC
GGATTCCCTTGA
>g746
ATGCTGGCGGTTTGGGCCGCCGTTTTCATCATTAAGAGATACTGCTTTCCGGAGAGATAC
TCGGCACTGCGGAGACGCCACGAAGACTTAGACAACAGCGCCACCAGCAGGCCGCCGGAC
GACTCCGACGAGAAAGAAACCAAGAGTCAAAAGTTACCATTGAGTGTGGACGGGCAGCAG
GATGGGGGCATCGGGGGCAACTATGGCAGGGAACCCAGTGAAGGGATGGGACCCTCTGAG
GCCAGTTTTATGAGCAGCGTGAGGAATAACATCGGCCGCGGCCTGAACTTGGCGGTGGTA
AACGCCTCCACCGGGGCTCTTCTCCAAACGGCATTTTTCGACATGTATTCCGGAGATGTG
AAGGAGCTCCTGAAGTTTATGGAAGCCATCAAAGACGGCTCTTTGGTGTTCGCCGCGTCC
TACGATGATCCGGGAACCAAACTGGATGATAAAGCCAGAGAAAATATTTACGCAGCTCGG
GAGTAA
>g747
ATGAAGTCAGGACTCACCAGACACATGCGCTTTCATACTGGAGAGAAGCCATTCGTGTGT
CCTGAATGCGGGAAATGCTACCCTAGGGCGGAAAGCCTCAGTTATCATATCAAAACGCAC
ACGGGAGAGAAACCGTTCGCGTGTCCTGAATGCGGGAAATGCTTCACTTTGACAGGACAC
CTCCATGCTCATATGAGAACGCACATGGGAGAGAAACCGTTCGTGTGTCCTGAATGTGGC
AAAGGTTTTATGAAAGAGGAAAATCTCACGTTCCATGAAAGGATCCACACAGGAGAAAAG
CCATTCGCGTGTTCCGAATGTGGAAAATGTTACACGTCCAAGACCGCGCTTAGCATTCAT
GAGAAACTTCACACCAGAGAGAAACCGTTTGCGTGTTCCGAATGCGGAAAATGTTTTGCT
ACAAAGCCGGAGCTCACCGTACACGAGAAATTCCACATCAGCCTGAAGTCATTTGCGTGT
TCGGAATGCGGAAAGTGTTTTCGTAGTCCCTCAGAACTCAAGCAGCATGAGCAATTTCAC
ACGGGGGAGAAGCCGTATGCGTGTTCGGAATGCGAGAAGTGTTTTTTGACGAAGCCAGGG
CTGCGGAGACACGAGCTGTTTCATCGTGGAGAAAAACCATTTGCGTGTCCGGAGTGCGGA
AAATGTTTTATCTTAAAGGGAGAATTGAACGCACACAAGCGATGTCATACTGGAGAGAAA
CCATTCTCGTGTCCTGAATGCGGGAAACGCTGCGCTACGACGGGGAGCCTCAGTGATCAT
ATCAGAACGCACACGGGAGAGAAACCATTTGCGTGTTCTGAATGTGAGAAATGCTTCGCT
ACATTGAGAAACCTCCGTGCTCACAAGAGAGTGCACAAGGGAGAGAAACTGTTCTCATGT
CCTGAATGCGGGAAATGCTTCGGTACACTGGGGAACCTCAGTGCTCACAAGAGAACGCAC
ACGGGAGAGAAACCATTCTCATGTACTGAATGCGGGAAATGCTTCGCTGCGATGGGGAAC
CTCACTGCTCATATGAGAACGCACACGGGAGAGAAACCATTTGCGTGTTCTGAATGTGGG
AAACGTTTCGCTAGACAAGATAACCTTGATATACATGTAAGGTTACACAAAGGAGAAAAC
CCGTTTGTGTGTTCTGAATGTGGGAAATGTTTTACCACGCAGGGAAGCCTTAATCAACAT
GAGAAGCTTCACACTGGGGAGAAATCATTTGTGTGTTCTGAATGTGGGAAATGTTTTTTG
AGAATGGTGGAGCTCACGTACCACGAAAGGATCCACACAGGAGAAAAGCCATTCGCGTGT
ACCAAATGTGGAAAAAGTTACACGACCAAAAGCGCGCTTGGAACTCATGAGAAAAATCAC
AAAGGGAAACCATTTGCGTGTTCCGAATGCGGAAAATGTTTTCCCACAAAGTCAAGGCTC
ACCGCGCACGAGAAATACCACACAGGCGAGAAGTCATTCGCGTGTTCGGAATGCGGAAAG
TCTTTTCGTACAAAACCCCAACTCAAGCAGCATGAGCGAACTCACACGGGAGAGAAACCG
TATGCGTGTTCGGAATGCGGAAAATGTTTTAACACAAAGCCGGAGCTCTCCATACACGAG
AAATACCACACAGGCGAGAAGTCATTTGCGTGTTCGGAATGCGGACAGTGTTTTTATACC
AAACCACATCTCAAGCGGCATGAGCAGATTCACACGAGAGAGAAACCGTCCACATGTTCG
TAA
>g752
ATGCCTGTTGGTGGCCATTGGCCTGTCCTCTCTCTGTTGGTGGTAGTCAACATGGCTTTG
TTTGTTGGTGTCTGGCTGGTTGTGTTTGGTGTCGGGAAGCGGTTTCTTCTGATTGCCATT
GCTGTATTGTCAAGTTACTCCATCCACCTCCTTCTGAAGTGCTCGGGCGTTGTGGGTATT
CGCGCCTATGAGCAGCTGGGACAACGAGCGTTTGGTTCTGGGGGAAAGATTCTGGCTGCT
CTGATCATAACAATGCACAATGTGGGCGCAATGTCTAGTTACCTCTACATCATCAAGTCC
GAGCTGCCTCTTGTTATTCAAACCTTCCTTGGACTGAGTCGCAATACCGGAGACTGGTAT
CTGAACGGTAATGTTCTCATTATCATAGTCACCATCAGCCTCATCTTCCCGCTGACACTC
ATGAAACATCTCGGTGACTATCAGAACTGTACTCGGCCCCGAACACACAATGACCCAATC
CTCTACACAATGGCCACGCAACACAAGACAGGGGAATCCGTACGCTTTGGAGGAGCCATG
TTGCAGCCGCTATTCACAGTCAACTCCCAGACGGCATACTCCATCCCGATTGTGGCTTTC
GCGTTTGTGTGTCACCCAGAGGTCCTGCCCATATACACAGAGCTGCGCAGAGCCACCAAG
TCACGGATGCAGAATGTTGCCAACGTGTCAATCTTTGCCATGTTTGTTATGTACCTGATG
ACAGCCATGTTTGGTTACCTGACGTTCTATGGTCAGGTGGAGCCGGAGATGTTACACACA
TACAGTAATGTGGATCCCCTGGACAAGCTGATGCTGTGCGTGCGCCTGGCGGTGCTGGTG
GCCGTCACACTCACTGTTCCCGTGGTACTCTTTCCAATCCGGAGAGCGATCCAGCAGCTC
CTCTGCCCGGGACAGGACTTTCGATGGTGGCGTCACATTGTCATCGCCACGTGCCTGCTG
ACTGTTGTCAATATTCTGGTCATCTTTGTCCCCAACATCAAGGATATTTTCGGTGTCATC
GGTGCCACGTCGGCTCCCAGCTTGATTTTCATTCTCCCCAGTATCTTCTACATCCGCATC
GTCCCCAATGAAAAGGAAGCGTTGACATCACGGCCGAAGATCCAGGTCTGTACAGATTCC
CCCAGCTAA
>g758
ATGAGCCAGCAAGGAGCGGCCCTGCAGAGCTACAACAACGAGCTGGTGAAATGCATTGAG
GATCTGTGCAGCAAGAGAGAGGAGCTGAACCGCCAGATCCTGCAGGAGGAGGAAGAGAAG
AACAAGCTGCAGAACGACGTCCGGATCCTGACCGAGAAGCTGGCCCGGGTCAACGAGAAC
CTGGCCCGGAAGATGGCCTCGCGGAACGAGTTTGACAAAACCATCGCGGAGACGCAAGCC
GCTTACATGAAAATACTGGAAAGTTCCCAGACTTTACTAAACGTTCTGAAGAGGGAAGCG
GGGAGTTTGGGGAAATCCACGGACGTTCGAGGAGACTGCTGA
>g763
ATGAGCCAGCAAGGAGCGGCCCTGCAGAGCTACAACAACGAGCTGGTGAAATGCATTGAG
GATCTGTGCAGCAAGAGAGAGGAGCTGAACCGCCAGATCCTGCAGGAGGAGGAAGAGAAG
AACAAGCTGCAGAACGACGTCCGGATCCTGACCGAGAAGCTGGCCCGGGTCAACGAGAAC
CTGGCCCGGAAGATGGCCTCGCGGAACGAGTTTGACAAAACCATCGCGGAGACGCAAGCC
GCTTACATGAAAGCGGAGCTCTGTCGGGGGATATCCTCTTCTCTCATCCAAGCCTCGTGC
TTCCTGGTGGGGCTCTTCCGCCCGTTAACGCCTGCTCGTTTCCCGGCCTCCGTCGGAAGT
TTGTAA
>g764
ATGATCCCGGCCGCCGATGAAAGCCGCCTGCAGAACGAGACGCTCACTCAAACCATCTTC
GCCGAAGTGTCGAAAACCCTTAGGACGTTCCCGGTGAGGTTCCAGGGCGCCCGAATCCTC
ACCGGCAACGAGGAAGGGTCCTTGGGCTGGATCACCGTCAACTATCTCCTTGGCACCTTC
GTGACGCAGCATTCCTTGATGAACATTTGGATTCACCCTGGAAGCCAGATCCTTGGGGCC
ATGGACCTCGGTGGGGCTTCCACCCAGATGACCTTCCTCCCCTCCGGGGTTATTGAAGAC
AAGAGCACCGAGATGAGTTTCCGCCTGTACGGCTACAACTACACAATCTACACCCACAGT
TACCTCTGCTACGGGCAGGACCAGATATTCAAGAGGATTCTCGCAAAACTCATCCAGGCC
ACCTCTTCTGTGAACCCTTCTAACAATGGTGAGCCAGGGCTTTCCACGGTGTCATTAATC
TGTTCCGGGTGCAGCTCGCAGGCCACGGCGGAACACGCGGGCGGCCAGTCAGAGACGGCA
ATTCACAGAAGCCACCGGGTACAAGCAGCCCTGGCCACGTTCAGCCTCGCTCCATCCACT
CAGCTTAGTTATTGA
>g749
ATGGAAGATATGGGAGAAAATGTATGTAAATCCAATGAGACAGATGCTGGGTGGAAAACA
ATATTCACAGACAAAATGCAAGAGCGAGGCTTAAAATTGCAACAGAAAACCATGGAAAGA
TTGAAGCATCAAAGAGCACAAGATGCAAAACTAAGGAAAACAGATCCACCAGATGAGCTG
ACCAAGGAGTGGTTCAGCCAAGATAAGCAGTCTGTGGACACCAGGGCTTACATGCTTGAA
AATGTGATGCCATCTGTTTTGCCTGGGTTGGAGGCTCTGCTTAAGGAAGTGGAGAAGAAG
AGAGTTCTGGAAGATGATTCCACCAAATTTGACCCTGTCAATTTTCTTGGAGAATATTTA
ATGAGAAATAACCCTGAGTCTGGGGTTGGTTCTCATTCTCATCCCTACGTCCGTGGCCTG
AAGGAAGTAGTTGCAGATCTCAAAAACAATGTGTTTGATCTAAAGTATAATAGGCTTGGT
CAGCTAAAAGAAGAACTGAGTGAAGCCCAGAACCAGAGAGTACAAGTGGCAACCATTCAA
ACTCAGGTAAAAGAGAGAAGAAAGGAAGCCCTATCTCTTCAGTTCCAGGAATGGACTTTG
GATGTCAGCGGGAGGATCCCTCTAGCTCTGGTACAAAGTGCTGTGATATCATTTCTAGAA
GTGGCCCCTCAACTTCCACAGTCAGGAGTGGACTTTGACACAGTCTGTACAATGGAGCAG
AAGATAAATCAAGATGAGTTTGTGGAGTACGTTTATCCCTTTATTTGTGACTTCAGCACA
GACACATTCCGGGAATTTCTGCATCACCTTGCACAATGTGCAGACATGTTTCGCGAAACC
ATTCGACATGACATCTGGAGGAAGAAGTTTTCAGATCTCTTCCTTGCATGTGACACAGGG
AAGGTGGGCTTCCTGGACAGACAAAGGGTACTCGCATTGTTGGAGACTTTCTATGACAGC
ATAAATCTTGAATCAGAGGGGTGGCAGTTAAGAAACCCAAGGCAATGGCCAGTTATTGAA
CTGGATGAAATGGAACCATCGGACTTCTGGAGTGGCTTCCAGGAAAAGCCTTCAGAGAAG
GATGAGAAAGATGATGATGAATCTGGAACTACAGCCTTAGACACAGCAGCAGGTCATATG
CCAACAGAGATCCAGAACACTGGGGAGGAATTTACAGCAGATTCAGGGGAAGGCTCAACA
CCCCAAGCCACAGAGGCCAGGACTCCTGAAAAAGACTTACACTACTTTGAAGGGAAACCC
TGGTCAGATTTATGCCCGATCATCACGGATATCAGTTCCCGTGGTCCCTCTCACGTTGCT
AGCGCTTTTAATGGCAGCTCGCTGAATTTGCCCCAGTTTGTGCAGCTGATGGAGACGTTC
TTGGGTGAGGGAGCACCCTTACCAATTGTGGATAAAATCACCACTTTTGTACAAAAGGAA
TACGTTGAGACCGAAGAGGAGAAAATGACATTATTGAATAAGGTCCGACATGAGGCTGTG
ATCGCAAGGCAGAAGTTGGTGCTACAGGCTCTTTTTGAGAAGTGGGACAATGAGGGCTCT
GGTTTCCTGGAACTCGATGAGGTGGAGGCAGTACTGTCCAAGTACAAGGATGGAACAGAA
ACCGAGGTCATAGTCAAAGGAAGGGAGTCTTTGAGTTCCTCACAGTCCCAGCGTGGGAAG
CTTTCAGCCCCTCAGTTCTGCACTTACATCATGGGGGTAGTCAGTGAATTGCCCGGACCC
CATAATGAGGGCTTTGAAAATGTGGTGGGATTCCTGACGTCCAGCATGGAACGAACGCAG
GCTGAGAAGATGCGAGGGTTATCTCGCAGAAAGTGGCTTCAACGAATCCAATCAGCTGCT
GAAACCAGTGGTGGCAAACTGGATCCAGTATATAAAGCTGTGTTTCAGGCTCTCTATAAG
GATGCCGAGGCTCATGGGAATAACAAAAAGATAAGTGCCAGCATTGGCCTTCTGGAACAG
GTACCTGCTGATGGAAAGTGGACAGAGGTCCTACGTTATGTAGCATGTACCTCTGATGAT
GCCGTGTATGTATTAAACAAGACATTGCATAAAGACATGAAGAACGTAAGTTTTGCGGCA
GTGGACAACGGGCTACCAGTGCATGTCCCACGAGTTCAATATCATGGACACATCCACTTC
TGGAATACAGAGCGCCCAGCAGAAGAGAGAAAGGGATCCCTCATTGTCCTTCCTCTTATG
GATTGCCAACAAAGGGTGTTCGGTACCCTCAGCATTGATACTCTGAGAGAAACCAGGGAT
CGAAACATTTTCCTTACCCATGAAATCAGCTTTTATCAGGCATGTGTTCATGGGGTCACG
CACATGTTTAGTAAAGCGTACCACCACGTCCAGATGCAGAGCGACATTCTCCAGCTTGTA
AGCAGCGCACTTGCTTGGATCTACCCTCGTGCTCCCAACATCCATATTATCAACACTTAC
CTCATGGAACCCAGCGCAGACAAGGCACAAGGTTATGTGTTCCGTAATATGATGCGTACA
GACAACAGTACAGGGGCGTCTCAGACGTACAGTTCCCCTGCCATACTACGCAGACGTGAT
AACCTTTTCAGGGATTACCTATTTAAGTGTGCGGATAGCTCCGAAGTAATCACAACAGAT
GCCTATGGAGAGCGCCACATTGCTGTACCCATTCGTGACCCAACAGGACGGGCTATTGGC
GTACTGGATCTGAGTACTGGGCAGTGCTGGGAGTTACCAGCCCATGAATATCAAGACCTA
CAAAAGATGCTACAGATGCTGCAGGAAGCATGCGTTGAAATTCTGCAGCAGAATGATGAG
GAAACCCAGAATAAAGCAGTCCTAGAAGCAGAGCAAGCGGCAGGCCAGAAGAGGATGGGA
GTCCTGTTTCATCGCTTTATGCTGCAGGACCTGCGCCAGTGCGTCAGCAAACTGGACCAC
AAGTCCTTTGCGGAGCTGAAAAGTTACAAGGAACCACCAGCCATGGTTCATAGTATCCTA
AAGGCTGTCCTACTCCTTTTCAGCCCTGATGGGACTGAGTCTGAAGAAATTCATAGCTGG
AACCAATGTAAACTGAAAGTTAATAGTGATCTGATTCGGAAGATTTTATCTTATGATCCA
ACAGCTCGATCTGTGCAGGTCAACCCTGAGATCCTCGCTAAGTATATCAAAGGTATACCC
AGAGGAGCAGTCTGGAAGCATGGCTCCATCCCAGCCGAGCACCTCTATAACTGGGCTTTC
ACCTGCTTGTCCCTACTGGAGCTCACTCAGAAAATGCAGAACACCCATCCACCCTCCCTG
ACTTCATGA
>g754
ATGGCTGTCAGCGCCAAAGGTTGGGCACGCCCGGGGCCGGAGTCCGGGAACATGCCGGCA
TGGAAACTCGAAGTGCTGGAGAGGAAGCGGGCAAAGATGGGGAACCTGCCGCCTGCATCC
CGGACTCCGGAGCAGCAGGGTTCCCCTGAGAGGAAGGCGGGCCCCGAGGAAAGGCTGGTG
CTGCAGGAGAGCCTGGGGCCCCTGCACGAGAACCCGTTCATCAAGCAGGAGAAGGAGCGG
CGGCGCCGGCGCGGGGCCCCTCACTCCCCGGGCCGGGGCTCCCCCATCCGGCAGCTGCTG
GATCTGTACAGTAACGTCCCCGGCATCAGGACCATCCGGGCGGATAACATCATCATCATC
GAGTCCGACCCTGCCTACTTCGGGACAGCCAGGAGCCCCTCAGAGCAAAGCCCGGGGGCC
AAACCTCACCACGACCCCATGGAGGAGCTAATGGCCAAGAGGGGCAGCAAAGTGGCCGAG
ATCAGGGCCTCTAAGGTCGTCATCTATGAGCCTGAGAAGGCCAAGGAGCCCCTGGGGCAG
GAGGCCAGCGCTGTGCTGGAGGAGGCCGGCAGGGTCAGTCGGCTCCTCGAGAAGTTTGAC
CGGGGCCACAGCAAGCCGGTGAGGGCCAGGAGCTGGGAGAACCTGCTGGACTCCCGGCAC
AGCAAGCCCACCACGTTGCCAAAGCCACCATCTATGGAGCGGCGCGGCCGAGTCCAGAGC
AACAAGGCGAGGAGGTCCGGAGACGTCTCCCCCTCGTCTGCCTCCCTCCTGGACGAGGAC
AGTAAGCGCTTCCCCTTAAACAACCCCTCCTGGTTACCGGACAAACTGCCCTCTGCCCCC
TCTCTCCCAGACCCCGCTCTGTTTCACAAGAGACCCTCCAGCCCCGTGACCCCACCGGCT
AGCGTTGCCCCGCTGTCTCCGGTGGCTGGGCCTCTGCCCCCTCCCTACGAGAGCTCCACG
GATGAAAAGTTTGTGTCCCCCGTTGTGGCTTCTGTCATCGAGAAGTTCGAGGTGGGCTCC
GCGCGCAACAATCTGCCCCTGCCCAAGCTGACGAGCTTTTCCCAGAAGACGAGCAAAAAC
ACCATCATGGTCAACCCAAAAGCTGCCTCTCGTAATCACGGGAACCCCGCCGAGGGGAGT
CGGTCTAAAGAGACCCCACCGCTTGTCAACGGTCACATTGACCAATCCAGTGAGAGCCCG
AACGCCGACGGCTCCATCAGAATAGAAGACCTCCTGAATAAGAGCAGGACGTCGCGGGGC
GCCTCGGGTCAGAAGATAGGTGAGGGAACAGGGCAAGTGCCATCTTCAGGTGCTTCAGCT
AATGAGAATCTCTCAGGGGCCAACACCTGGAGGCCAAAGTCTGAGGTGAACCACTTAAAA
CCTAATGCCCCCCCTGAATCCGGTGCCACGCAGTCCGATACCCCTTCGTACAACCACTGT
GAGCAGGGTATGAGCAGTGCCACTCCTAGCCAGCAGAAGAGGGTCTCGGCTTCCACCAGC
AGCAACGACTCCTTCGAGATCCGGCCGGCCCCCAAACCGGATCTGAGGAACATCCCGGAG
AGCGACGTCCAGGCGAAGGCCCTCGCCAACATCCGCGCCCAGTCCAAGAACTCCTTCGTC
TTCATCCCCAAGAACAGGCAGGTCCCCGGCGGGCCGACGCGCCACCTTCCGGGGCGGACC
ACCGATCAGCCAAAAACCACGCTCAGCGCTTCCGTGACCAACGGCCCCAAGGCGGACGTC
ACCGACGCCCCGGCAGAAAACGGCCTCCGACCAAACGGAGAGGACAGCGCGCCCCGTGCA
AAAAAAGCATCGAGCGTTCCTGCGCTCTCCGACTTTGACTGGAAAAGCGGTCTTTTACCC
AATTCCGCCTTCGAGGGGCATCATTCCTTCACAGACGTTGGGGCAGAACTGGAGTATTTC
AGCAGCGCCCCCCGAGACGACGAGGTCGTTCTGCCCGTCCCAGTCACTAAAATCCACGAC
GTTCCCGTCACTAATATCGATGACATCATCGGCTGCGAGGAGAACGATTTGAACATAGAG
GCCAAAAATGATGTGGGAGAGCCGGCCCCCGCGGTGCCCTCGTACCGCCCCCACGCAGCG
CTGTCCTCCACGCGCAATAAAGGGGGCAACACGTTCACCGTGATACCCAAGCGGAGGCCG
CTGAGCGAGCAGGAGGCCTTCAGGACGGCGGTCATCGAGGACGAGGACGACGAAACCCGA
CCCAAAGGAACGAGGAGCGAGGCTCCGTACTCCGAGCTCGGGGCCGCCCTCAAAAAGCGA
TATCCAACCGCCGAGGAGATCCGGGTGATTGGCGGCTACCTCTCCCTGTCCAAGTCCTGC
CTGTCCAAGGACGGCTCCACCAGGAAAAAGATGAAGATCTCGTTTAACGAGCAGAACATC
CACACGATGTTTGAATATCCCTCGGAGGCCTCGCTGGCCGAAGAGACGGGTGAGGAGGAG
CCCAACGAGGCGTCCGGCTCCGAATCCGAGGAAGACGAGAGACCCTCTGGCCACTTCCTT
CCACGTCCCACGTTTGTCAGCAGCGGGGTCTCCAGTAACGGCGTCCGAGCAAACTCTGCG
AACTCAGGTCTCTCCAGCTACACTCCGAAGCACTCTGTGCAGTTCAGCAAATGGCAGGAG
GAGAATCCACCCCCGGCCACGGACGGCGTGGACGCCCAAAGAGAGATGCTCACCCCGGCG
GACGGCGACTCTCACCCCGACTTCCGCAGCGAGCCGGCTCTGTACTTCTAG
>g770
ATGGCTGAGAGCGACTGGGATACCGTGACCGTGCTGAGGAAGAAGGGCCCGACCGCCGCG
CAGGCCAAGTCCAAGCAGGCGATTATAGCCGCTCAGCGAAGAGGCGAAGACGTAGAAACC
TCCAAAAAATGGTCAGCCGGTCAGAACAAGCAGCACACGATCACCAAGAACACAGCCAAG
CTGGACCGGGAAACGGAAGAGCTTCACCACGACAGAGTGCCCCTCGAGGTGGGCAAAGTC
ATCCAGCAGGGCCGGCAGGCGATCGGCATGACCCAGAAGGACCTGGCCACGAAAATCAAC
GAGAAGCCTCAGGTGATCGCAGATTATGAGTGCGGACGAGCGATCCCCAGCAACCAGGTC
ATGGGGAAGATCGAAAGAGCACTCGGCATAAAGCTGCGTGGAAGAGACATTGGAAAGCCC
CTGGACGCCGTCCCGAAAAAGAAATGA
>g771
ATGGCAGGCACAAGGCTGCGGTTTTACCAAACCAACCACACGGCAGCGGAGGAGCAGGAA
GGAGACCTAAAATTCAGCGCCGCGCAGGAAGAAAGCGCTCGTGCCCTGTACCCCGACCAC
ATTCCCACCAGCACCCTGCAGAAGGTCCTGCTGTCTGCCGGCTCGGCGGTAACGTCTCTG
TATGACCCCTATAGACACGACATGGTTGCGGTTCTTGGGGAGACCACAGGCGCGCAGGCT
CTGCAAAACCTCCGAGACCGTATGACCAGGGACCCCGAAGGAATCCAAATATTACAGGAA
CGGCCTCGTATCCGAATGTCTACCTTGGATATCGAGCGGTTGAGACAGATGCCAGACGGG
GCTTTTGGGCGAGAGTACGTACGCTTCTTGGACGTCAACCGCGTCTCCCCTGACACTCGC
ATGCCCGTGAAGTTTGTAGATGACGAGGAGCTGGCGTATGTGGCACAAAGGTACCGTGAA
GTCCACGACCTGATGCACACGCTTTTGGGGATGCCGACGAACATGCTGGGGGAGGTTGTA
GTGAAGTGGTTTGAAGCTGCGCAGACGGGGCTGCCGATGTGCGTCCTGGGAGCCATGTTT
GGGCCTCTGCGTCTTAATAGCAAGAGGCTGAAGCTTCTGGCAGAGCTCATTCCCTGGGCG
GTGCGGAACGGACGCAGCGCGCGGTGCGTCCTCAGCTTCTACTACGAGAAGCGCTGGGAG
CAGAGCGTGGAGTCCCTGAGAGAGGAGATCGGGATCCTGCCGCCTCCTCCTATCAAATCC
TAA
>g774
ATGGATGCCCGGGTGCAGGCGTTTGCGTCTTTGTGCTCGCTGAGCCACAAGGGTCAGAGA
TATTTGTGTCACAGCAGAGCCGGCGACCTGCGCTCCGGCGGCCTGGAGATCACTGTAACG
AATGGCATTGAGGTCTGGAGATGTGAATTATCCAAGGAGACCCTGGAGGAGTGGGACACA
TCTGGGAGTTTCGGGTCCCCGGAGGACGGCCCAGGAGCCCTGCGTAAGATTTTTGAGCGA
GTGACCCCCGTTCTCGATGTGAGTGGCAGCCTGGTCACCCTGAGCCTCTCGCTCCATTCT
GGGAATGTGACCCTGGAGCTTTTCAAGCTGTCCATCTCCGAGACGCGCATGCACCTCCAG
ACCCTGCTCTTCGATTTGGCTGACCGGGCGCAGGATCTTGAAAAGCGCCAGAGGGGAGGC
AGCGTAGCGGCAGCACCCAGTCCCGTGAAACCGGCTTCACTTAACAATTTAATGAACATT
CCAGACATTGAAGCTCGCAGAAGAGGCTACGGGACCTTGAGCACAAATATTAAGAAGAGG
CTGCCGGGAGAATCTCTCGTCAACCCCGGGTGCAAAAGAAAAAAACCTGCGACTGGGGTC
GATTTTGAGGAATCCTGA
>g768
ATGTTTTACGGGAGGAAGATAATGCGAAAGGTCACTACTCTTCCAAACACTCTGGTTGGG
AGTACGGTTGCCAGACCCAGGAGTAGGAAGCGAACCAGAGTCCTGACTTTGGCCAAAAGA
ATTCTCCGTTTTAAGAAAGAATACCCCACTCTGCAGAAGAAGGAGCCGCCGCCGTCGCTC
CTGGAAGCCGATCTCACCGAGTTTGACGTGAAGAATTCTCACTTACCCTCGGAAGTTCTC
TACATGCTGAAAAATGTCAGGGTGCTCGGTCACTTCGAGAAGCCTCTGTTCCTGGAGCTT
TGTAAGCACATGGTGTTCGTGCAGCTACACGAAGGGGAGTACATCTTCCGCCCGGGGCAG
CTGGATAACAGTATCTACGTGGTGCAGGACGGCGTATTGGAAGTCTGCATTCAGGAGAAC
GACGGGAACGAGATGGTGGTGAAAGAGGTTCCGCCGGGAGACAGCGTCCACAGTTTGCTC
AGCATTCTCGACGTTATAACCGGACACCCGGCTCCTTATAAAACCGTTTCGGCCAGAGCT
GCCACCGCCTCTACCGTCCTGCGGCTTCCCGCCAACGCCTTCCAGGACGTCTTTGCCAAA
TACCCGGAGACGCTCGTCCGGGTCGTCCAGATTATTATGGTGCGACTCCAGCGGGTGACC
TTCCTGGCACTGCATAACTACTTGGGTCTGACCACCGAACTCTTCAACTCCGAGAGCCAG
GCCATTCCTCTGCTGTCGGTAGCGAGTCTGACATCCGGCGCCGGAAGCGGTAAAAGTATC
AAAAAACAGACGTCGGCCGTGTCCACCGACGAGGATCACGGAGGAGCCGCTGAGAAGGCT
GTGGAGTGTCTGCCGGATCCGGACGCAGGAGTCCTGGACCCCAGCAAGTTCTCTGCCGTT
GACGGTTCGGTCAGTGGTCACAGGAGAAGCCGGTCATCTTCCAACCTGGCCGACATCCCC
GGGAGCCCCAAGGCCACCAAATCCGACATGGACATGGCTTACGAGCGCGCACGCGTGAGT
CTCACCCCCGACGACCCGCCGCCGAGCCCTGTAATGAACAAGCCCATCCTGAAGAAGTCG
GTGACCGTCACGGAGACGCCGTCGGCCGTCTATCACTACAAGGAGGAAGATCTGCTCATC
CCGGAGTTCAGCGTCAACAGACACATTAATGCCGTGTTTGATGCTGCAAAAAAAGATCTC
TCCACCCTGATGAAGCTGCAGGACGTCAACATCCGCTTCGTGATCTCCGGCCTGCTGCAC
GTTTACCAGCGGAAGATCGACCGGGAGGAGGAGACGTGTCTGTTCATCACCCACCCGGGC
GAGCTGGTCGGACAGCTGGCCGTCCTCACCGGGGAGCCGCTCATCTTCACCATCAAGGCC
AACCGGGACTGCACCTTCCTGTCCATCTCCAAGTGCCACTTCTATGATTCTTTAGCGTGG
AATGAAAGCTCTTCTCCCTTCCAGCTGCAGCTTCCACCGCCAGCGTTTGGAGGCCTCCAT
GGCAGGATCATGCGGGAGCAGCCCAGCGTGGTGCTCGGCGTGGCCCACACCGTGGTGAAG
CGGATGTCTCCCTTCGTACGGCAGGTGGATTTCGCGTTGGATTGGATGGAAGTGGAGGCC
GGACGGGCCGTGTACAGGCAGGGAGATAAATCGGATTCGACGTACATCGTCCTGAACGGG
CGACTCCGATCCGTCATCAGGAAGGACGACGGGAAGAAGCAGCTGACCGGTGAATACGGC
CGCGGAGACCTCATCGGGGTGGTGGAAGCTTTAACCCACCAGCCGAGGGCCACCACGGTG
CACGCCGTGCGAGACTCTGAACTGGCCAAGCTACCCGAGGGAGCCCTGACTTCCATCAAA
CGCAAGTTCCCCCAGGTAACAGAACTGCAGCCAATCCCATGA
>g769
ATGTCTACAGCGCCACAGACGGGGTGCCACGCCGGACAGGTCCAGTGTGACCGTGGGTCG
TGCGTCGAGGAAAGATCCGTATGTGACGGGACCGACGACTGCGGAGATAGATCCGACGAG
AGCAGCTGTGAAAAATTCACCTTCTGCACCTTTGAAAATGCGACATGCAACTGGACGTCT
ACCTGGGAAAAAGTCAACGGCTTCAGCTCCAAGCCGGGCCGGGATCACACAACAAGCAGC
AGATCCGGTTCCTTTCTCCGGGTTAACGATGGAACCGCAACGTTGGTCATCCCAGGTATT
CGGAACCAAGACAACATGGCCTGTGCGCTCGTACTGTATTATCTCACAGCTGGCTCAGAA
GAAAACCGCTTGGCTATCAGTTACCGCAACACCAGTTCTTCCGAGGATAGCGTCATGCTG
GAAAGAGTGGGGCAGAGGGGCGAGGTGTGGCTCCGAGAGAAGGTCACCTTTCCCATTTCC
CAAGAGCCATTTCAGGTCACCATCACGGGTGTTGCGGGTAAAGGAGCCGATCCCGGTGTT
GCCCTGGATGATCTCATCTGGTCTCCCGGATGTGTCCTGCCGGGGAGTAAAACTGGGGAT
ACACATCTAGAAATTCAGAGGTTTCCATCGCTCGCGGAGCTCCGCAGCCCCGGGAAGGCA
GCCTGCAACGCAATTCCTGATGGCTATGATTTTGGGGGGGATAATAAAGGCTGGCAGGAC
GTCAGTATCGGGGTGCAGAGGTGGAGCGGAGACATAAAGACCTTCCCGGAAGAGGGCGTC
TCAGGGCATCTTGGGGTGACGCACGCCGAAGGGAACCTTCTAACAAATGCCGTGATCCTC
AGCCCTACTTTGTGCTCTAGCAAAGCTTCCTGCATGGTGAACATGACCTACTGTTTTAAC
AGTGGACCAGCAGGCTCCTTGTCTATACATGTATTGGACTCCGAGCTGCGGACACACACG
CAGATCTGGCACAGCCAGGGCCACAGCAGATCCTGGAGAAGCGCTTTGATTCCGGTGGGA
GAGAGGCTTCAGCCGTTCCAGTTTGTCTTGTCGGGCTCCGTGGACCCTCTTCCTGGTGGG
ATGTGGGGGGCAGCCGTGAAAAGCATGAAATTTCTGGAATGTGACACACAGGTCCCTCTT
GAGAATACAGAGTCTGTTACCTGTAACTTTGAGACGGGCCTCTGCGGCTGGTACCAGGAT
CAGACAGACGACATCGACTGGGAACAAAGAACGCTGGCCGATCACACCACGGGGAACGGT
AACTACCTGTATGTAGCCGGAGGGTCCCGCATGGATCGAGGGGGTAAAGCCCGTCTTATA
ACTTACCCACAATCCATAAAACCCAGATCCCAGTGCCTATCGCTGTATTACCGCATAGGG
GGACCAGACACAGGCACCTTGAACCTGTTTATTAAATATGACGGAGGTCAGGAGACGTTA
CTTTGGACCGTCTCCGGCACCCGCGGGAACAAGTGGCACCATGAATCCATTCCTCTCTCA
CACCCAGCCAAGGATCAGTATCAGCTGATCCTTGACGCAGTCCGCGATGGTTCCGTGGGG
CACATATCGATCGATGATATTACTGTGAGATCCAGTCCCTGCGCGGCTTCCACGCACTGC
TCTTTTGAGGCCGGAACCTGCGGCTTTACCACGGAGGGGGACAAACACTGGTGGAGACAG
CAGAGCCTGCAAGCCAAGCCTCACGGGGGACCCTTTTTCGATCATACGCTGCAGACGGTC
ACAGGTCATTACATCATTGTCGATACCAGCGCTTCTACTTTGCCAAAGAAAAAGACAGCT
GTTCTGACATCAGGTTGGTACAATACCCAGCCTGCCCTCCAATGCCTGAGCTTCTGGTAC
CAGCTGGGTGGCAGTAACTCGGGAACACTTAACGTCTATAAGGTGGAGAATTCGGGCAAG
CACCACACAAAGACGCGTCTGCTTAGCGTGAGTGGGACTCATGGAGACAGCTGGCACTAT
CGGAGTGTGAAGCTCCAGTCTGACCATGAGTGGTTGCTGAAGTTTGAAGCTGTTGGCGCT
GGAGGAGATCGGAGCTTTATTGCAGTTGATGATGTTCACATGAGCCACCATCCCTGTGAT
GAAGCAGCCACGTGCGACTTTGAATCCGGCTCCTGCGCCTGGACCAACACGCGTATTCCA
CTGATGGACACGTATGATTGGGACTGGACCAGTGGAGCTGCCCTGACCACCCAGAGCTCG
GCCGTGGAGAAGGATCACACTCTGGGCACCCCAGAAGGACATTATGCCTTTGTGGATACC
GGAGTGATGCACGCGGAAGGGAGCTCCGCATGGATGATGAGCGAACATCTCACGGCCACA
GCCAGCTCCTGTTTCACTTTCTGGTACCGCACGGATTCCCCGGACCGTGCCCACCTGGGA
GAGCTGGTCCTGTATTTGGCCAGCAGTCACGGCCTGCAGCCCCTCTGGGTCCTTCACGGC
TACCACAGCGGCGACTGGCAACAAGTGCAGCTACAGATCAACAGCACGGCGGAGTTCCAG
ATTGTATTCGAAGCATCCAAGGGGTCTCACGCGCACCCCACTACCATCTCATTAGACGAC
GTGGCATACACTTTGGATTTACCGTGCAACGCAAAGAAAACAGAAAAGGGGAAGAGTAAC
GCGGGGGAGATAGCGGCCATTGTCCTCGGCATTCTCCTGGCCCTGCTCTGCCTGGCGGCT
GCCTATCTGCTGTATCAGAAGCGGAAAAAGAACCTGGACGACGCGCCCCGAGTCTCCAAC
CACAGCGAGGCAATCGACGGATTCGATAACGTGGTGTTTGGAGAGGTATATTCTGTCTCA
TTATCCCAAGAATTTTACCTGCACGTTGGCTGA
>g783
ATGTATACACAAGACGTGTCCCGCAGAGCTGTTCCCGGCCCGTGGGAACAAAACATACAT
TTTCCCCCCAAAATCTTTTACATGTGTGCTGAATTAGAAGGAGAGCGTGACTATGGACCA
CCCATTGACCTTTGGGGTGCCGGTTGTATCATGGCAGAGATGTGGACAAGAAGCCCCATC
ATGCAGGGCAATACTGAACAACATCAGCTTACTCTCATCAGCCAGCTATGTGGCTCCATC
ACACCCGAGGTCTGGCCCAATGTTGACAAGTATGAATTGTACCTGAAACTAGAATTGCCT
AAAGCCCAGAAGAGAAAGGTGAAGGACAGGTTAAAGGCCTACGTGAAAGACCCATATGCA
CTGGACCTCATAGATAAGCTTCTGGTTCTGGATCCAGCTCAGCGAATAGACAGTGACGAT
GCCCTCAACCATGACTTCTTCTGGTCTGACCCAATGCCTTCTGATCTGAAGAACATGCTT
TCAACACATAACCAATCCATGTTTGAGTACTTGGCACCTCCAAGGAGGAGAGGTGGCCAC
ATGCCACAGCAGCCAGCCAATCAAGCAAGGAACCCTGCTGCCACCAACCAAACAGAATTT
GATAGGGTCTTCTGA
>g778
ATGTATGGTCAACAAGCCTACCCTGCCTTCTCCTTTAACCACGGGCTTCTTCAGGAGGGT
TTTGGGGGCTACCCTCCTTACCCCCAGCAGTACTACCACTTTTCAGCAGGAAAACTTGAT
AATCTGGACTTGGGAGGACAACCCAACGGTGAAGGAGCGGCTCAGGTGATGTCTTGGAAT
CCCTTGGCTCAGTTTGAGTTCCATAATCACCTGAATGCCTATGAGCAGCCTCCCCAACCC
AGGGGACAGAGTCCGGCCAAAGTGGGGGCCAAGAGCATCAAGGAAGAATCGGATTATGAT
TCGGAGTCCAAAGAGGAGTCTGTGGCTGAGAAGTTCTCCCCAGCACCCAATCTTCCTGAG
CCCCAATTTTCCAACAGCTGGAGTTCCCCTTACTGGCCGGGGGCCTCCACCGCAACGGCC
TCCAACCCAAGCCCCCCATTGCCCAGCCAACACCTCCCCAAACCCCCCAGTGCACAGGAC
TCTCCTACCTACCCCACGGGGGCAAACCACAGCCCCCAAACCCCAGCGGAGTGCGAGGTG
ACCAGCCTGGAGAGCAGCCGCTGCGGCAGTGCCAACGTTACGAGCAGAGGGACCGAGGAA
GCCTATGACGGGAAGGGCTCCTTCACCCAATATATCATCCGCACCTACGGGAACATGAAT
GATGTGGAGGAGGAAACACCGACTGAAGTGGAGATGGAGCAGTTCGCCAAAGAGTTAAAG
CACAAGCGGGTATCGCTAGGCTACACGCAAGCTGACGTGGGATATATGCTGGGCATTATT
TTTGATAAACTCTTCAGTCAGACGACGATCTGCCGCTTTGAATCGTTACAGCTGAGCTAT
AAGAATATGTGTCAGCTGAAGCCGCTGCTCAGTCACTGGCTGGTGGTGGCTGAAAAGTAC
GACAATCTCCTGGAGTTGCTTACGAAGGAACAATCGCTGATTCACACGAGGAAAAGGAAG
AGGAGGACGAACATCGAGGCTGTGGTGAAAGCTCATCTGGAGAAATATTACATGAAATGC
CCCAAACCGTCCGCTCAGGAGATGAGTCAGATGGCAAAAGATCTAAAAATCGGAAAAGAG
GTTGTTAGGATATGGTTTTGTAACCGGAGACAGAAGGAGAAACGCGAGGGGGACGCGCAC
TCCGCAGCCAATCCCAAAGAAGCTTACGAAGTTGGGGTCCAACCTCTATTGCCCCATTCG
CCCTACAGTCTGCCCCAAGGAATGGCCTCCCAGGGTTACTTGGCTGCTCCTCTGTCGTCC
TCGCCTGGAATCTACGCCTCCGCGTTTCACAAGAATGATTCGTTCCACCAGTCGCTCGGC
CATATGGTGCCCATGGGGAACCAGCTGTGTTAA
>g786
ATGAGCGGTGGCGAGGAAATTGGATTTATTGAAATGATTACAGAGGTTGCCTTCCCCACA
GAAGCTACAGAGATGGCAGACAAATTAAAGAACAGCAAGATCATATTCGTAGTGGGAGGA
CCAGGTTCGGGCAAGGGCACCCAGTGTGAGAAGATTGTACAGAAATATGGCTACACCCAT
TTATCTACTGGCGACCTTCTCAGAGCAGAGGTGTCCTCTGGCTCGGAACGAGGCAAGACT
CTGTCTGCCATCATGGAGAGAGGAGAATTAGTTCCCTTGGACACCGTTCTAGATATGTTG
AAGGACGCCATGATCGCAAAGGCTGACAGCTCGAATGGCTTTCTGATCGATGGCTACCCG
CGAGAGGTCAAACAAGGAGAAGAATTCGAGAAGAAGATTGCTTCTCCATCGCTGCTGCTG
TACATCGATGCTGGGTCTGACACAATGGTGAAAAGGTTGCTGAAACGTGGTGAGACTAGT
GGCCGGGCAGATGACAATGAAGAGACCATCAAGAAGCGGCTGGAGACCTATTACAAAGCT
ACGGAGCCTGTGATTGCTTTGTATGAAGGAAGGGGAATCGTCCGAAAGATAAACGCAGAA
GGCTCCGTAGATGATGTCTTCAAACAAGTCAGTGAAGCCCTGGATGCACTTAAATGA
>g773
ATGGTGGCCGAAGAAGCGGAGGATAAAGTGGCCGACATGGACGCCGTTCTGCCCCAGCTT
CTCTCCCCCCTTCCCCACGTGGTGCAGCAGGGGGTAGAAGTGATAATGAGCGACGTGCAG
GGGTACCGGGAGCAGGTGATGGCGGCGCTGATGAGCGACTCGCGGTGCAGACAGTACATA
GCGGCGCTGTGCAACCTGCTGAGAGCTCCCGACGTCAGGTTGTGCAGTAGTGCGGCGTAC
ATCCTGGGCACGGTGGCAGAAGACCCAGACATCTCCTCGCTGCTGGTGGAGCTGGCCAAG
AGCTGGACAGACTGGGACCTGCTGGTCAGATTGGGAGACATGTTACAGTGGGAGGACACG
GAGGTTGTGATGAACGCTGCGGGGGCGCTGGGAACGCTGGCAGAGAGCAGCTCCGGTCGC
GGATGGATTCTTGAATCCCCCAACGCTGACTTTATCATCGAGAACATTGCGGATCTGCTG
GGCTCCCCCAGTGAATGGACGGCCAGTAATGGCGCCCTGGTGCTTGCCCGGATCTCTATG
TGCCCCCAGGGCTGCGCCAGGCTTCTGGACCACCCCAAATCCGATGCCATACTCCGAAAG
CTGGTGGTCTCGCTGCGCGTGGATGAAGCGGGCTGTGGGTTGAATGCTGCATTTACTCTG
GGGCGCCTCTGCGACACCGACGTCGGGAGAAAGAGGGTACTTGGTCTACAGGAGGCTGAA
CACATGGTGTCTCGTCTGGAGGCCATGATGTCAGAAGGGGATGCCGGAGGGAGTCGCAAT
GCATGCTTCGCGCTCACGTGCTTAGCCACGGACCGCGTCGGCCACCAGCACGTTCTGCAG
AGCGCGTCCTTCCCTCGGATTCTCGACACCCTCAGCCGCCTGCTACGCTCGGACGAGCAG
GAGTCCTGCTGGTTTGCTGCCATGACTGTGAAGGTCTTATCCGGTTACCCTGAAGGTGTT
GTGAGGCTTCGGCAGCACCCGGTACTGGAAGAAGTCCTAAAGAAGGCTGCAGCTTCCCAA
ACAGCTGGAAAAGAGCTGCTGGAGGAGGTGCAGGAAACCCTCGTCAATCTCCAGCGTCTG
CCCCAGCCCCGCTGTCCCAGAACCGAAATACTGACGTCAGGGTCCATACGGGTCGGCTGG
GAGGAACACAAACCAAACAGCGGCCTGTCCGTCACATACAGTCTCTTCGATGGTGAGAGG
CTCCTTTACCAAGGCCCTTCAAGCTCCTATCTAATCTCGAACTGCAAGCCAGGCCAGCAA
TACAATCTCCGAGTTTTCATGGAGACCATAGGAGACCGAAGCCCAGAAAGCCCGGTGGCG
TCGGTGACCCTGGACGAACCTTTGCCCGGCTGTCCTCTGAACTTCCAGGTTACGAGTCGA
ACGGCCACGAAAGTCAGACTCAGCTGGTCACCCCCTGCTGAAAATGGCGCAACCGTAAAA
TCTTACATTGTGTTCAGAGAGGAGACCCCCGTGGAGACCACCTCTGAGCTTGGCTGCATA
GTAGGAGGTTTGTCGCCATCCTCTAATTACACTTTTAGCGTGTGTGCCTGCTCGTCAAGC
AGCCGGGGCCAGAAGGTATCTCTAGTTGCCCGGACAGTTGACAAAGGTGATCATGCTCCG
GGCAAACTCACCGTCTATGTCATCGGCCGAAGCGAGATCTTCGTCACGTGGGATGTGCCC
AGAGCCCCTCTAGGTAGATTCTTCAACTATGAGCTATGCATGAACGGGAAGCCGGTGTAC
TTGGGTACAGAACGTTCTTACACGGCCCGCCGCCTCGTTCCCAGCACAGAGTACACCTTC
ACGGTGTGCGCCATTACCAGTGAAGGGCGCTTCGAGAGTAGAGCGGTCACTAAACGCACT
GCCAAGGACGAGTACAGTAACCTGAGCAGAAACCATGTTACATTGGAGAACAACCAACCT
GTGGCTTCTTCACCTGCACGCGATCCACCAGATCACGCTGAGAAACAGCCAAAGATGCCC
GATCCTTCCAAACATTGTGCCACTAAAAGTCACCCTATACGGCTGCTCCTCAGCCGACAG
ACCAGCGGGTCAGGAGATAATAAAAGCCAAGCCCCCAATTCACGGAGAAACTCGATGCTA
TCATGGTCTACTGACTCAAGTGAGGGCACTGCTGGACCTCTGCTGTCCCAAGTCCAGCCT
CCGAAGCTAAGCCCCCTGGGAGTATCGGACTCTACAAGCTCCAAGCTGGGCCACTCTGGA
CCTCCTGATATCAAAAAGCCAAAAAGTTCTCTGGGTCTGCGACCAACGCCCGTGGCATCC
GTTCATTGCCTGGAGCCGGGATATCTGTTGTATCAAAGGGCCAAGACGGAAACTGAACTC
GTGCGGCCGGCGCAAAAGGAAAGGCAGGGCCAGCAAATGCATGAATGTGAGTTGGAGACG
GAGAGTCAAAGGAGGACACCGGAGCCACTGCGAGATCCCTTACTGAAATCTAGACACCGA
AACCTGAAGCTCAGAGCTTGGAACGTTACCCAAAGTTTGAAAAATGGAGAAGAAAAGACG
CACGGGTCGTGGAATTGTCCCGGGATCTCTGCAGAAAAAGAAAAGCCCCATGCGGCACCA
CTGGCCAAGAACGCCCTACGCAAGGATGGACCTTTCTCACAGACAGCGGGACCGTTCGCT
GTGAGATATCAGCCCGTATCGCAGTTTCATGCAGAACTATCCAGGATCCAGAACCTCCAG
AAGGTAGAAAAAAAACTTCGGAAGCCTTTCAAAGGACAAAGGATTGAAGGACCGCTGTCT
GGCCATTTTCACAAAGACGTTCTTGCTCTCGTCGGAGAGTCTGGAGTCACGTTTCGACTG
CCCCTTGCCCCAAGCAACTCACTTCTTCCACAGAGAGCCATTCCACGCCAACGATAG
>g784
ATGCTGTCTTATTTACAAATAGATGTTCTCTCCCCGCACTTAGTGCAGGTGAGAGAACGG
ATTCGGATCAACGGGCAGCCAATCAGCAAGGAGCTCTTCAGCAAATACTTCTGGCAGGTG
TATAACCGCTTGGAAGAAACCAAGGAACATGAAGGGAGCCCCATGCCTGCTTATTTCCGC
TTCCTTACTATCATGGCGTTTCATGTTTTCCTGCAAGAGAAGGTAGACCTAGCGGTGCTG
GAAGTTGGGATCGGAGGAGCATATGACTGCACTAACATCATCAGGTGGCCAGGTGTCCCT
GCTTTCACCGTCCCGCAGCTGGCTGGCCCTCTGGAAGTTCTGAAAACCAGAGCCCAGGAG
ATTGGGTGCCCCCTCTACATGTGCCCTGATCTGACGGCGTACGAGGATGAAAACCTCACG
CTCCGGCTCGGCCTGGCCGGAGATCACCAGAGAGTAAATGCTGCCCTGGCGTTGCAGTTG
GCGCACACATGGCTTCAACGACAGGGATTTCAAGACTTTGCAGAACGGAAGAACCCTGAT
CAGCTGCTTCCTCCGGTCAAATGGCCCTTTCCGCTGGCACCTGCATTCCGCCCCAGTGTG
CAGATGGCTCAGGGTTTACAGGATACCGTTTGGCTGGGGCGCACTCAGATTCTGCAGAGG
GGCCCCGTATCTTATTGCATTGACGGGGCTCACACAAACAGCAGCGTGAAGGCCTGCGTC
AGATGGTTCCACCAGGTGGCGCTCAACGAGGAGAAGGCTGGCGTAGGTTCGGTAATCAGA
GTACTAGTGTTTAATGCCACGGGGGAAAGAGACACCGCGGCTCTGCTGAAGCTCCTCCAG
CCCTGCCATTTCGACTATGCTTTGTTTTGTCCCAACATCAGTGAAGTTTCCGGCGTGGGC
ATTGCTGACCAGAAAAATTATAATGTGACTTTGGAGAATATCCTAACCCGGTGTCTGGAG
AATCAGAAGAAGTGGAACAAGTTGATGGAAGAGCGCAGCGGCTCCGATCCCTGGGGAAGC
TCCCTCCCCGTAGACGCCTTGATCCAGGACAGTCCACGGGGCGCTCCCTTGCTCCTCTCG
CCCTCTGCCGAGCGCCTCTTGAACTCTAACTCGCTGGTATTTCCTTGCATCTCTCATGCC
CTGCAGTGGGCAACCCAGGGTAGGGACCCGGAATTCTCCTGCCCAGACGCTAACCTACTC
CACCATCATCCTGTGGCGAGCTCCGGTTCCGTGCTTTTACGAGAAGCTGCCCGTATACAG
ATCCTCATTACCGGGAGCTTGCACCTCGTGGGCGGGGCCCTCAAACTGCTCGACCAATCA
CTGTCCCAGTGA
>g787
ATGCCTCTGTACAGACGAAATAGAGACTCTCTACAGAGACGTTCCCAGGATTCTCTAGTA
TCTTATGCTACGACGGCCAGCGAGACGCGATTATTATACCTTCACCTGGAGCCGGGGATC
GGGAAAGATTCCGCTTTTTGCTTCTTTCTCTGTTCTCTGCTGACTCAGCTTTATTACAAC
CAGTTCAGGCGAGTCTATGAATCATGCGTCTGGCCGAGAGTCAGCGCGTCTCCACCAATG
CTGTGTTCGGCTAGGTTCAGCTGGACCGAGCCATTGTCACCGGAGCCAGTCCCTCGTGCA
TCCAGCGGGAAGAGGGGAAACTCCTCTAAGAACGCTATGAGCTCCGGACATGGAGAGAGG
GGGGAAAGGAGGACGATTTTCAGGATTTTAGTACATAAGGAATTCATTAGAAGAGACTTT
AAGAGTGTGGCCTTGATGAGCAAGAGGGTCCTGTTGGCGATCGTGGAGACCGAGGGGAAC
CCGGGGACCCCGGATATCCGAACCAGGCGCGTGTTCGCAAACTTCCGTAGAGTTATGTCC
GATAATGACTGCTTGGCTAGCTTGGAGAATCCGCGGAACGTCCCCGATGACCCGTGTCGC
TGTTCATTTGCAAAATCATTGTGTGGTCAAGAAGGACCACAGGGACCCAGAGGGAAAGCT
GGACAGCAGGGCTTACCGGGAAATCCAGGACCACCAGGTTTCCAAGGCTTACCGGGATCA
AAAGGCGGAATGGGTATGAAGGGCAAGCCTGGGAAACCAGGAGAATCCGGAACACGAGGG
CAACCTGGTGCTGTAGGCTTGGCTGGTCCCCGGGGAGTGGTAGGAAGACAAGGTCAGGAA
GGGCCCTCCGGCCCGGATGGCCTACCAGGGAGGGATGGCAGCCGTGGTATGAAGGGCGAA
CAAGGAGAAGATGGCGAAATCGGCCCCGCTGGAATGTCTGGAAAACGAGGAAATACCGGG
GTGCCAGGCTTTCCCGGGGCTCAGGGACCAACAGGATTCAGGGGGGAGAGGGGATTACCC
GGACAAATTGGGCTTCCAGGAAAACGTGGTACAGAAGGTGGAATGGGATACCCGGGAGCC
AAAGGAGAGCGTGGAACTAAAGGCCAACCGGGGGACACTGGCGAGATGGGGTATCCTGGC
ATAGCCGGACTGTTTGGACCAAAGGGACCTCCTGGTGACTTAGGATTCAAGGGCATTCAA
GGGCCTAAAGGGCCACCAGGTTTAATGGGAAGTGAAGGTGTCGTTGGACCCGTAGGAATT
GTGGGTCCAACTGGAATCCCAGGGCCACATTGTGTCTTCAAAGGCTCAAAGCCAAGTGAG
GCTGCTGTCCTGTGCATATCTGTTCCTAGTGGTCTACACGATGCGGATGTCCGCAGGGAA
TACCTGGTCCTCGGGGCCCACCTGGACCCCGTGGAAAGCCTGGACCCCCGGAGCCCCACT
CATGGGAATCCCGCAGAACACGAGGAGCCGCTTAGTTCCACCCAGGCTAAGCTGTCGGAT
TTGTATTTAGCTCATCAGGTCCAAAATTATCATGGACTCGGCCTCGGGGCTGTTCTTGGG
ATCACATTTGGAGCATTTGCAATCGGCGTACTTCTCACAGCCGCCCTGTGGTTTATTTAC
ACGCATACACATGAGGGCTCGGGGATCACAGATATCCTGATCTGCTGCCTAAACTGTATA
CAGGGCAGAGGGGCATATACTGACACTTGGACGCTTCTCTCTCATCCAGGGTCGACTGTT
AAAATGCAGCCTGTACCGACAACAGCCGGAGGCTCGGAGAGCAGCAGCACAAATCACAGC
ATCGACAGCACGCAGAGCACCCCCTGCTCCACCGGCAGTAGGGCATAG
>g793
ATGACACGGACGCCCAGTGAGCATTCAGTCAGCCCGACTGAAATCGAGATGCCTTTGCAA
AAGGAGACAAGAGATGTAGGCACCTCTACAAACCATGACCCAGAAGAGGAGAGCTTTCGG
GAGCGCAGGATGGGAGGAGGCAGAAGAGCTGTGTCCATGATAGATCAGTCTGGAATAAGC
CAAACCTTCCACTTGCAGACTCCCCTTTCACGCTCCATACATTCCAGTTTAAGAAGGGTT
CCCCCTGAGTTCTCACGTGACTGTTCCCAAAGACGGTCTCTTCCTGACCTAACAAGCCAG
ACCAGGACAACTTCTAGAGTCACATTCAAGATACCTCTTAGCTCTGAGTTTAAAGAACCC
ATCAGCTTCTCTCACCCCTCTTTCACATCCTCCTCGTCTTCTGATGATGAAGAAGAGGGT
TACTTTCTAGGAGAACCCATTCCCCTGCCTCCGTTTATGAGACCACCAGGGTGCACTCCC
CCCTCAAACCCTACCTCCACACCCAAGAAGAAAGACAAGAACTGCATTTTATCATGA
>g794
ATGTATAAGCTGGACTTACCCCTCGATCCAAAAGAAGTTTCCGCAATCGAGCGGAGGAGG
AATCAAGAGAAGCAGAGGCAAAGTCGTATCTTCAATGCTAAATTCCGGACCATCGGGGTT
GACCTTCCCACGTTGGAAAGACAAGTCGAAGAGAAAAGAATAGGAGAGAGGACTGAAAAA
GCTCGAGATGAGGCGTTTGATGCAGACAGGGAGCAATATGATAAAATTGCCCTGTTGTTG
GAACAAAAAGAGAAAGAGGAAATCCGGAAGCTGGAGCAAACTCTACAGGAGTTCAGAAAG
CAGCGCCAACAGCCCGAGAGCCGCAGGGAGTTTGACATCTATGACCCAGAAGCCCTGAAG
AAGGATCGACCAGCCCGTATCAGCGATGATGACCCCAGATGCGGACCGGCCAGCCTACAG
AAATTTGCCGGAGAAGACCTGAGTGAGAAGGAACGGCAGAAGATGCAAGCGGAGTTGACG
AAGAAATGGTTGACCGAGCAGAAGGAGGAGAGACAGATGTCCGAACTGCAAAACAAGTAT
GCAGATCTATTGTATGGAAAGAAAAGCGTGGAGTTGGACGAAAGGGCCCAGCATTTAAGC
ATGATGGAAGAAGAAGGCAGGAAAGCCATAGACATGGCCATCACAAACTTCAACCAAGCC
CTGACACTGGAAGCATCAGAACACAGGAAACTTCAGAATCAACAAGAACAAGAAAATAAT
TTTAAAGAGATCTATAATCATATGACTGGAGATATTCTGACGGAGAACCCTGCAGTAGCA
ATCAGCGCCTTTGGTCCTCATCGTGTGATTCCAGATCGGTGGAAGGGAATGACCCCTGAA
CAGTTCAAAGCCATCTGTGAAATGCAGGAGCAGCAAAGGCAGGAAAAACAGAGGTTGGCG
GAGGAAGGCAGGCAGCGGGACGCAGAGTGGGATAAGCAAAGATTGCTGGTGGCCCAAGCG
GGAATGACCCTGGAGCAGCAGGAACAAGAACTCAACAGGGAGCTGAGGAAGAGGATGGAT
TCGTATAACCAGCAGCTAAGCAGGGAGCAGCAGGCACATTTGCAATATCTAGAAAAGGAA
GTCTATACCAACCGCCCGACCGCGCATTACTACACTCAGTTCAACACGACCAGCCGCTGA
>g795
ATGACACGGACGCCCAGTGAGCATTCAGTCAGCCCGACTGAAATCGAGATGCCTTTGCAA
AAGGAGACAAGAGATGTAGGCACCTCTACAAACCATGACCCAGGAGAGGAGAGCTTTCGG
GAGCGCAGGATGGGAGGAGGCAGAAGAGCTGTGTCCATGATAGATCAGTCTGGAATAAGC
CAAACCTTCCACTTGCAGACTCCCCTTTCACGCTCCATACATTCCAGTTTAAGAAGGGTT
CCCCCTGAGTTCTCACGTGACTGTTCCCAAAGACGTTCTCTTCCTGACCTAACAAGCCAG
ACTAGGACAACTTCTAGAGTCACATTCAAGATACCTCTTAGCTCTGAGTTTAAAGAACCC
ATCAGCTTCTCTCACCCCTCTTTCACATCCTCCTCGTCTTCTGATGATGAAGAAGAGGGT
TACTTTCTAGGAGAACCCATTCCCCTGCCTCCGTTTATGAGACCACCAGGGTACACTCCC
CCCTCAAACCCTACCTCCACACCCAAAAAGAAAGATAAGAACTGCCTTTTATCGTGA
>g792
ATGGCTGCTACCGGTTCGTCTCAGGCCCCGATTTCATTCGGGTTCAGTCGCAGCTCTAAG
AAGAAACTCGGCTCGGCTGCGGACCTCGGGAACCGGGAGGAAGATAAACGGGAGTATCTG
GTCGGGGCGGAAGGGAAGGAGTTGCTCAGGAAAATCTGCCAGCATTGCCAGTGTCCGTGG
GAGGAACATGGCACCGTGGGCACTCCTCAGGATCTGGAACGAACCATATGCCGCCTGGTA
TCAGGAGCGCAGAGACATTCTTTGAACGATAGCAGTTCTGACAGCTCTTTGGAGAAGTAC
GCATGGGTACCATCTGGATTAACCCCTGAACAGGTTCACCAGTATTTTAGTTGTTTGCCT
GAAGATAAGATCCCCTACGTACAGAGTATCGGAGAGAGACACCGAATGAAGCAACTTCTC
CGACAGCTGCCCCCACATGACTGCGAGGGGGAGGAAGAAGAGGAAATGCTGACGCTCTTC
AGCCAAAGACGGAGACTTGAAAATTTGGGTCGTGGGTCCGTCCATCCAGTCTCCAGAACA
ATGAACGGGACGGTGTGTCAGAGGTGCGGGCATCAGATCAGCGGAGGCGACATGGCGGTG
TTCGCATCCCGGGCAGGGTTGGGGTCCTGCTGGCACCCTCGGTGTTTCACCTGTGCCCGC
TGTACGGAGCTGCTGGGTGACCTCATCTACTTTTATCAGGATGGGGAGGTGTATTGCGGC
CGTCACCACGCCGAGCTTCAACGGCCACGGTGCCTGGCGTGCGACGAGGTGATCTTCTCA
ACAGAGTGCACTCAGGCTGAGGGTTACCACTGGCACACAAGGCACTTCTGCTGTTTTGAG
TGTGAAGGTGTACTCGGAGGACAGCGCTACGTTATGAGGGACAGGCGTCCGTACTGCTGC
CCCTGTTACGAAAGACTCTTCTCTCAGTATTGTGATAGCTGCGGGGAGTGCATCGGTAAG
AAGGAGCTTGGGTTATCAACCAAAAGCTTCAGGAAGCGCCTGGTTCTTGGCCAGCAATTG
GCCCAGGATGACATTTCCCTCTGCTGTCACTGCCATGTCCCCAGCCACCCCACACCAGCC
TTCTCCCCTACTTTCCTCACTAATTTCCATTCCCACCTCCTCTCGCCATCATCCTCTACC
CATTTCCATCTTTCTCCCCCTTACAAAGCGTAA
>g798
ATGGCGAATTTGAGAAGCCTGAAGGGCCTGGTTGGCATTGTTACCGGAGGGTCTTCAGGT
CTCGGCCGGGCCACGGTTGAACGTCTGGTTAGTCAGGGAGCCAGCGCCGTCATCCTAGAT
TTGCCGAAGTCCGACGGTAGCAGCGTGGCACAGTCGCTGGGAGATAAATGTGCATTTGCT
CCAACTGATGTAGATCGTAGCCGGTATTTTCTCCTAACCGGTTCAATGCTGGGTGGCTCA
CCCTGGATTAAGTGA
>g796
ATGGACACAGCTCTTCTGCCTCCTCCCATCCTGCGCTCCCGAAAGCTCTCCTCTTCTGGG
TCATGGTTTGTAGAGATGTCTACATCTCTTGTCTCCATTTGCGAAGGCATCTCAATGAAT
GCTCACTGGGCGTCCGTGTCATACTGCAGCTCCAAGAGCAGTAAATCTGCCTATGTCGAG
GTGAACGGAACTGAGAGGAAGAAGAGAGAGAAGCAGGAGTCAGCGGCGGACATCACCTCC
GAGATGTTCCGCGGCTCCAGAAGACGTCGGTCTCAGGGAACAGAGGCGGATGTAACAGCG
CAAGGCCAGCCATGCCTCACCTGTTTGGAGCGATGTCCCGGCTTCCTCGCCCACAGATGG
AGGAAAATCTGCCAGCATTGCCAGTGTCCGTGGGAGGAACATGGCACCGTGGGCACTCCT
CAGGATCTGGAACGAACCATATGCCGCCTGGTATCAGGAGCGCAGAGACATTCTTTGAAC
GATAGCAGTTCTGACAGCTCTTTGGAGAAGTACGCCTGGGTACCATCTGGATTAACCCCT
GAACAGGTTCACCAGTATTTTAGTTGTTTGCCTGAAGACAAGATCCCCTACGTACAGAGT
ATCGGAGAGAGACACCGAATGAAGCAACTTCTCCGACAGCTGCCCCCACATGACTGCGAG
GGGGAGGAAGAAGAGGAAATGCTGACGCTCTTCAGCCAAAGACGGAGACTTGAAAATTTG
GGTCGTGGGTCCGTCCATCCAGTCTCCAGAACAATGAACGGGACAGTGTGTCAGAGGTGC
GGGCATCAGATCAGCGGAGGCGACATGGCGGTGTTCGCATCCCGGGCAGGGTTGGGGTCC
TGCTGGCACCCTCGGTGTTTCACCTGTGCCCGCTGTACGGAGCTGCTGGGTGACCTCATC
TACTTTTATCAGGATGGGGAGGTGTATTGCGGCCGTCACCACGCCGAGCTTCAACGGCCA
CGGTGCCTGGCGTGCGACGAGTTCCGTTCACCTGAAAGCAGACCGCGCCTCCCAACTCAC
GAGACGTCACCCAACTCACGAAAAGACAGCCCTACCTGGAAAGACGATCCGGTCACTCCC
ACCGTGCGGGAGGAACAAACCCCGGAAGCAGAATGTTCACAATGCAGCCACCGAGAAAAG
GGATCCTACTCATTGCATTGA
>g797
ATGATGCGCCTTGTAGCGTACACTCAGCTTTCCTCCATTATCTCAGCCTCCCCCTCCAGT
GATGAGCCTACTCCAAAAAAAGCCATCTTCACTCCTGGTGTAGGGAGTGGGATCATCTCG
TTTTCTCTTCCAGATTGTGCTCTATGCTATAGGATGCTCTTCTCTATCTTTGCCTTCGCA
ACATGTGGAAGTTATTCTGGACAGTTCAGTCTGAGCATTGAATGTAACAACAAAAATGAA
AGCAAGCCGAATATAAAAGTGGACTTTGAATACCCCTTTAAGCTGCACCAGAAATATTTT
GAAGCCCCCACGTGCCAAGGTGGAGCCACTTCCAAGGTCTTCTTAGTTGGAGACTACTCT
TCCTCTGCTGAGTTCTTTGTCACAGTGGCTGTCTTCGCCTTCTTGTACTCGCTCGGGGCA
CTCCTCACATACATATTTCTACAGAACAAATACCGTGAGAACAACAAAGGCCCAATGATT
GACTGCATAGTGACAGCTGTTTTCACGTTCCTTTGGCTGGTCAGTTCCAGCGCTTGGGCC
AAAGGCTTGTCGGATATCAAGTTGGCAACTGACCCTGAGATGATCATCAAGAACCAGATC
CCACCCTTCGAGAAGGGCGAAGGAAAGTGTCAGGAACTGAGCGACCCAGTAATGTCTGGG
CTTAACACCTCTGTGGCCTTCGGGTTTTTGAACTGTGTCATCTGGCTGGGGAACATTTGG
TTTGTCTTTAAAGAGACAGGATGGTCAACTCCATTTATGAAGTACCCACCACCAGCGCAA
GAGAAGCAGCCGGCGCCTGACAGCTACACCCAGGCCCAGGGCTACGGCCAACAAGATACC
TACGCACAGCAAGGTGGCTACCAACCTGACTATTATGGCCAGCAAGCTGATTATAATCAG
CAGGGGTACACCCAGCCGGGATATACCCAACAAGGCGCCCCCACCTCCTTTTCCAACCAG
ATGTGA
>g803
ATGAGTCTGCAGTGGACCGCTGTGGCAACTTTCCTGTATGCCGAAGTGTTTCTGGTTTTG
CTGTTGTGCATTCCCTTCATTTCTCCCACAAGATGGCAGAAAATCTTCAAATCTCGTTTG
GTACAGTTATTGGTGGCATATGGGAACACATTCTTTGTGGTCTTGATCGTGATTTTGGTG
CTTCTGCTACTTGATGCGTTCCGTGAAATCCAGAAGTATGGCGTTGGAGAGCAGGTGGAC
CTCAAAAACAACCCAGTGGCCGTGGAGCATATCCACATGAAGCTGTTTAGAGCCCAGCGC
AACTTGTACATCGCTGGCTTCTCCCTGCTGCTCTCTTTTCTGTTGAGACGCTTGGTCACC
CTGATCTCAAAACAAGCCACTCTCCTGGCTTCCAATGAGGCCTTCAAGAAACAGGCTGAG
AGTGCCAGCGATGCTGCCAAGAAGTACATGGAGGAAAACGACAAGCTGAAGAAGCAATTA
CAAGCCGCAGGTGTGGAGGTGGGCGACCTGCCAGAAGTCGATACCGCAGAAGAAAACAAG
AAGCTTAAAGGAGAGGTTCAGAAACTCAAGGAGCAGCTGGAGTCCACCAAAAAATCTATA
CTCAAGTCTGACAATGAGGTGATTGCCATCAAGAAGCAGTGCGAAGGGTTAACCAAGGAG
TACGACCGTCTGCTGGAGGAGCACGCCAAGCTGCAGGCTCAGAAAGATGGCCCAAAGGAC
AAGAAGGAAGAGTGA
>g804
ATGGATAAGAGCAGCTTGTCTTTGGAAAACGGCAGCTACAAAGTTTCACTGGAGGAGAAG
AACGGACAGCTGATACCAAATGGGAATGGCCATGAGACCGATTTGTGCTGTAATGGATCC
ACCAAAGGGGGCCTTGTGTTCACCCCAAACTGCAGGGAGGGCGTCCCCGAAAGAGAGACA
TGGACTCGCCAGATGGATTTTATAATGTCTTGCGTGGGCTTTGCTGTTGGGCTCGGTAAC
GTATGGAGGTTCCCCTACCTGTGCTACAAGAATGGAGGAGGTGTCTTTCTCATTCCTTAC
ATCCTGATTGCCATCCTTGGAGGAATCCCAATATTCTTCTTGGAGATCGCCTTAGGACAG
TTCATGAAAGCTGGTAGCATTGCCGTGTGGAACATTGCTCCTCTTTTTCAAGGGATTGGC
TTTGCGTCAGTGGTGATCGTCTTTTTTTGTAACACATATTACATCATGATCCTGACCTGG
GGCGTCTATTACTTGGTGAAATCGTTCACGGCCACTCTGCCCTGGTCACAGTGCAATAAC
ACATGGAACACTCCGGACTGCGTGGAGATCTTCAGACATGACGACTGCAGCAACAGCACC
GCCAATTCCACCTATGGCAACCTGACATGCGATGAACTTGCAGACAAAGTGTCCCCAATC
ACAGAGTTCTGGGAGAACAAGGTACTGAGACTTTCCAGTGGTTTGGATGATGTGGGTTCT
GTGAATTGGGAGCTGCTCCTGTGTCTGCTGGCCTGCTGGTTGCTGGTTTACTTCTGTGTC
TGGAAGGGTGTCAAGTCCACAGGAAAGATTGTCTACTTTACTGCCACATTCCCATATGTG
GTTCTGCTCATCCTTCTTGTTCGTGGTGCTATGTTGCCTGGGGCAAGAGAAGGTGTTGTC
TTCTATTTAAAGCCAGATTGGTCGAAGCTTGGCAATGCCCAGGTGTGGATCGATGCTGGA
ACTCAAATTTTCTTCTCCTACGCGATAGGACTTGGAGCGCTAACAGCGCTGGGCAGCTAC
AACCGCTTCAACAATGACTGCTACAAGGATGCCATTTTACTGGCACTGATCAATAGCGGC
ACCAGCTTCTTTGCAGGCTTTGTGGTCTTCTCCATCCTGGGATTCATGGCACACGAACAA
GGTGTCGATATATCCAAAGTGGCTGAATCAGGACCGGGCTTGGCTTTTATCGCATATCCG
AGGGCAGTAAGTTTGATGCCGGTGGCTCCTCTCTGGTCTGCTCTTTTTTTCTTCATGTTG
CTGCTTCTGGGTTTGGACAGCCAGTTTGTGGGTGTGGAAGGATTCATTACCGCCATCCTG
GACATGATGCCACCCCGCTATTACTTCCGTTTCCAGAGGGAAGTCGCCGTGGCTGTTTGT
TGTGTGGTCATGTTCCTCATTGACATCTCTATGCTGACAGATGGTGGGATGTACGTCTTT
CAGCTGTTTGATTATTACTCTGCCAGTGGGATGACCCTTCTGTGGCAGACGTTCTGGCAG
TGCGTGGTTATTGCATGGGTGTACGGTGCTGATCGGTTTATGGATGATATTGCTCGTATG
ATAGGTTACCGCCCCTTCCCATGGATGAAGTGGTGCTGGTCTGTGATCACTCCATTTGTA
TGTATGGCCATCTTTATCTTTAATCTAGTAAACTACAAGCCTTTGACCTACAACAAGACC
TATACATACCCCTGGTGGGGAGAAGCCATCGGCTGGTGCTTTGCATTGTCTTCCATGCTG
TGCATTCCTGTTACCTTCCTGTATAAACTCACACGTGCCAAGGGTACCCTGAAAGAACGC
TGGATGCATCTGACCGAGCCTGTCTGGGGAGCTCATCATTTAGAATACATGTCACCCGAT
CAAGATGTCAAGAGCCTGACTAGCCTGACTCCTGTGTCAGACAACAAGGTCATCATCTTT
GAAAGCGTCATGTGA
>g802
ATGATGCAAGTGTGCCCGTCCCCTGTTACCCGAGCTGCCGTCCTGAAACGGGCGGCCGTC
TTGGCGTTGGCTGCCTACGGAGCACGTCGTCTTTACCCGGTGCTGAAACACGCCTGTCTG
AAGTCACCAAAGCATCAGAACTCCAATGGGCTCCCGGGCAAAACGGGAGAGGCCTCCTCG
ACTCCCCCTTATGAAAGGACTGGGGTGAACAGAGTTTTCTTCAGAAGACTGGCCCGTCTC
CTACGTCTGCTCTTCCCAAAGTTGGCTTGCAAGGAGTTTGGACTATTAGTATTACATTCA
GCGGCGCTCATCTCTAGGACATTCCTTTCTGTGTATGTAGCTAAACTAGATGGCCGCCTA
ACCCGCTGCATTGTTAAAAAACGTCCAGCCGGTTTTGTGTGGCAGCTGCTTAAGTGGCTT
TTAATTGCCCTGCCTGCCACCTTCATCAACAGTGCCATCCGGTATCTTGAGGGTCAACTA
AGTTTGGCCTTCCGTAGCCGCTTGGTGGCCCATGCTTACCATCTGTACTTTGGTAATCAG
ACATACTATAGGGTGAGCAACATGGACGGAAGACTACGTAACCCTGACCAGTCGTTGACG
GAGGATGTTGTGGCCTTTGCCAACTCGGTGGCACATCTCTACTCCAACCTGACTAAGCCT
GTGCTCGATGTAGTGGTCACCACATACACGTTAATCAGTACAGCCAAGTCTAAGGGTGCC
AACACCGGCTGGCCATCCCTGATTGCTGGACTTGTAGTTATGATTACAGCAAAAGTGCTG
AGAAGCTGTTCTCCTAAGTTTGGGAAATTAGTCGCTGAGGAAGCCCGACGGAAGGGAGAG
CTGCGATACATGCACTCGAGAGTGGTCGCCAACTCAGAAGAAATTGCCTTCTATGGAGGT
CACAAGGTGGAGATGTCTCTGCTGAAGCAGTGCTACCGGGATTTGTCCTCGCAGATTAAC
CTCATCCTGCTGGAGAGGTTGTGGTACGTGATGCTGGAGCAGTTCCTCATGAAGTACGTG
TGGAGCGCATCTGGACTGGTGATGGTGGCGGTGCCCATCATCACTGCCACCGGCTATTCT
GAGAGTGATTCGGCGGAGGTGAAGAAAGCGGCCATGGAGATGAAGGAAGAGGAACTGGTG
AGCGAGAGAGCTGAGGCCTTCACAACGGCAAGGAACCTCCTCACAGCTGCAGCAGATGCT
ATCGAGCGGGTCATGTCCTCTTATAAAGAAATAACAGAACTGGCCGGCTACACTGCACGA
GTTCATGATATGTTTGAAGTGTTTGAAGACGTGCAGAATGGCATCTACAAGAGACCAGGA
GAACTGGAAGAGGTCAGCCCCAAGAAAGGAAGGGTAATCCAGCACGGACAAGTAGTGGAT
GTGGAGAATGGCATCATATGTGAGAATATTCCCATCGTCACTCCAACTGGGGATGTCGTA
GTTGCAAGCCTCAATATCCGCGTGGAGGAGGGCATGCACCTACTCATCACTGGCCCCAAT
GGCTGCGGCAAAAGCTCTTTGTTCCGGATTTTGGGTGGTCTGTGGCCAGCATACAGTGGA
GTCCTTTACAAGCCCCCGCCTCAGCATATGTTTTATATCCCACAGAGGCCATACATGTCC
GTGGGAACCCTCCGTGATCAAGTAATTTACCCAGATACTGTTGAAGACATGCTCAGGAAA
GGCTTCACTAATAAGGACCTGGGAACCATTCTAGATATTGTGAATTTGAATTACCTGGTA
CAGAGAGAGGGAGGTTGGGACTCCGTAAGCGACTGGAAGGATGTTCTCTCCGGGGGTGAG
AAGCAGCGTGTTGGAATGGCGCGCATGTTCTATCACAGACCCAAATACGCCCTCTTGGAT
GAGTGCACCAGTGCCGTGAGCATTGATGTAGAGGGGAAAATCTTCCAGTCCGCAAAGGAT
GCTGGGATTGCGCTCTTGTCTATCACGCACAGGCCATCTCTATGGAAATATCACACACAC
CTGCTCCAGTTTGATGGTGAAGGCGGCTGGAAGTTTGAGAAGCTGGACACCGCTGCCCGT
CTTTCTCTAACGGAGGAGAAGCAGAGGCTGGAGCAGCAGCTTGCTGGCGTACCTGAGATG
CAGCAAAGGCTCAGTGAGCTGTGCCAGATCCTCGGCGAGGATTCCGAGGTAGTCGGCACG
GATAGCGGTCCCACCCCGGGACTGTCTGTGTAA
>g806
ATGGATAACCTCTGGAAATCGACCACATGGCTACGGGACGAGCTGGACTCTCCGACTCAA
AACATTCGCGTTCTCGATTGTCGTAGCCGGGAGCTCTATGATTCCTCTCACATTGAAAAA
GCTCTGCACGTCGCCCTCCCTGGATTGATGCTACGCAGACTGCGCAAGGGCAACTTTTCT
GCTCATTCCCTGCTCCCTGGGTCTCCCCCAGCAGTGAGAGGAGTGGCCGTTCTATACGAT
GAGTGCACCGCCACCCTACCAGGCCTGGTGGGAAGTCAGGGAGAAGAGCAGGAACCCATT
CTCGTGACTCTGCTGCATAAGCTTAGGAAAGAAGGTTGTCAGGCCTACTATCTACAAGGT
GGTTTCAGTAAGTTTCAAGCTGAGTTCCCTCATCACTGTGAAACCAACTTGGACTCCACT
AGCTGTGCCAGCAGTTCACCGCTGCCTCCGACCCCAGTGCTGGGACTCGGAGGCTTGTGT
ATAGCTTCGGACTGTTCAGACATTGAGTCGGATCTGGACAGGGAGCCACTAAGTGGGGTG
GATTCTGAAGGGATGAGCCCACGGAATCCGGCTCCTTCTTTTCCAGTACAAATCCTGCCA
CACCTGTACCTGGGCAGCGCAAGAGATTCTGGGAACATGGACACGTTAGCTAAACTCGGA
ATCCGTTACATCCTCAACGTCACCCCAAACCTACCCAATATTTTTGAGAAGGATGGGGAT
TTCCACTACAAGCAAATTCCAATATCTGACCACTGGAGCCAGAACTTGTCTCAGTTTTTT
CCTGAAGCAATTGAGTTTATTGATGAGGCAGCTTCCCACAACTGTGGGGTACTCGTGCAT
TGTTTGGCTGGCATCAGTCGATCTGTCACTGTCACCGTCGCCTACCTCATGCAGAAGCTC
AACCTGTCTCTGAACGACGCCTATGACTTTGTGAAGCGTAAAAAAACAAACATCTCTCCT
AACTTCAACTTCATGGGCCAGTTGCTGGACTTTGAGAAAAGTCTGGGTCTGAGCAGTCCA
GATGACAATCGGCCTCTTGGTCACTCGTTCTTCACCAGCCCTTCCAGCGACGATGTCTTT
GAACTGGACTCTTTGGACTCTACGTAG
>g814
ATGTCGACCGAACTGGTGGAAGACGAAACTCAGTTTTATTGCAAGGCAAAGAAATATTGG
AAAGACGTTCCTGCCACCGTCGACGGAATGCTCGGGGGATACGGGCACATATCCAGCATA
GATATCAGCGGCTCCAAAAAGTTTCTCCAAAGGTTCCTTCGTGATGGTCCACACAAGATG
GGAACTTCGAATGCTTTGGACTGCGGCTCAGGAATCGGCAGGATCACAAAGCGACTTCTC
CTGCCCATTTTCAAGACGGTGGATATGGTGGACATTACAGACGACTTTCTCAGCAAAGCA
AAGAACTACCTTGGCGAAGATGCGAAACGAATTGGAAACTTTTATTGCAGTGGCCTACAG
GATTTTAGCCCTGAGCCAAACCGCTATGATCTGATCTGGGTCCAGTGGGTCATCGGCCAT
TTGACAGATGACCACCTGGTGGCTTTCTTGAAGAGGTGTAAAAGCGGTCTACGTCCAAAT
GGCATTATCATCATCAAGGATAACATGACCCAAGAAGGTTCCGTCATGGACGAGGTGGAC
AGCAGCATTTGCAGAGACATGGACCTTGTAAGGAAACTCATCCGACAGGCTGGCCTCTCT
GTTTTGGCACAGGAGAAACAAGAAAACTTCCCCGATGAAATCTACCATGTCTACTCCATC
GCCATGCGATAA
>g815
ATGCCATTCCTCCATGGCTTCCGGAGGATTATATTTGAATATCAGCCTCTCGTAGATGAG
ATCCTAGGAGCGGTGGGCATACAAGATCCGGAGCAGCCGGAGGTCAACCAAGCAAGCGAC
AGCCAACTGGTCGGTGACAATGACAAGTTTGTCACTCTGAATGAGTTGCTGGAGAGACAT
[truncated: 27,126,338 more chars]
